# Supplementary material for: A Burden of Rare Copy Number Variants in Obsessive-Compulsive Disorder
Source: Research Square preprint supplement (doi:10.21203/rs.3.rs-3749504/v1), 2024-01-03
Supplement: Supplementary file 1 [file 9403737064694168c7761591.xlsx]

## Sheet: Legend
Table S1. Number of samples after each quality control step.
Table S2. Deletion call rate per dataset after each filter step.
Table S3. Duplication call rate per dataset after each filter step.
Table S4. Statistics on the number and rate of CNVs after each filter step.
Table S5. Global CNV burden test results. Global CNV burden test results.
Table S6. Summary statistics from gene-based CNV burden tests.
Table S7. Summary statistics from breakpoint-based CNV burden tests.
Table S8. extTADA analysis results. extTADA analysis results.
Table S9. Deleterious CNV carrier status and PRS. Case-only association test results between deleterious CNV carrier status and PRS (height, OCD, cross-disorder psychiatric).
Table S10. Genome coordinates, call information and basic gene-based annotation for deleterious CNV calls.

## Sheet: Table S1
Table S1. Number of samples after each quality control step.
dataset	genotype_array	raw	missingness	sex_concordance	relatedness	EUR_ancestry	PCA_nonoutlier	heterozygosity	intensity_qc	cnv_qc
ANGI_PhaseII_Pedersen_Controls_GSA-MD_wave1	GSAv1	1500	1500	1497	1444	1358	1355	1341	1258	1257
ANGI_PhaseII_Pedersen_Controls_GSA-MD_wave2	GSAv1	1500	1500	1498	1466	1382	1380	1366	1309	1308
LG500_ctrls_2019	GSAv2	500	498	498	474	422	422	421	409	409
NORDiC-NOR_cases_2019_1	GSAv1	243	240	230	224	210	210	209	202	200
NORDiC-NOR_cases_2019_2	GSAv2	239	239	239	135	126	126	126	122	121
NORDiC-NOR_cases_2020	GSAv3	371	368	362	325	301	300	299	293	292
NORDiC-SWE_cases_2018	GSAv2	1107	1078	1074	1060	912	911	901	873	870
NORDiC-SWE_cases_2020	GSAv3	925	901	896	880	793	792	790	776	765
norway_ctrls_2019	deCODE	343	341	341	335	314	313	309	296	294
norway_ctrls_2020	deCODE	384	383	381	377	358	357	353	340	340

## Sheet: Table S2
Table S2. Deletion call rate per dataset after each filter step.
filter_step	ANGI	LG500_ctrls_2019	NORDiC-NOR	NORDiC-SWE	norway_ctrls
qual_cnv	0.556335	0.493888	0.593137	0.595719	0.496845
centromere_telomere	0.48694	0.432763	0.535948	0.524159	0.44795
human_g1k_v37-N	0.48577	0.432763	0.534314	0.524159	0.44795
segmental_dup	0.442885	0.408313	0.493464	0.476453	0.411672
simplerepeat_lowcomplexity_satellite	0.438986	0.408313	0.493464	0.475841	0.411672
Immunoglobulins_TcellReceptors	0.438986	0.408313	0.493464	0.475841	0.411672
LCL_loci	0.438596	0.408313	0.493464	0.475841	0.411672
het_filter	0.438207	0.408313	0.493464	0.475841	0.411672
frq_gnomAD	0.422612	0.391198	0.470588	0.451988	0.394322
frq_eachdataset	0.25848	0.242054	0.295752	0.294801	0.233438
BAF_validation	0.25809	0.242054	0.295752	0.292966	0.228707

## Sheet: Table S3
Table S3. Duplication call rate per dataset after each filter step.
filter_step	ANGI	LG500_ctrls_2019	NORDiC-NOR	NORDiC-SWE	norway_ctrls
qual_cnv	1.05692	0.660147	0.776144	0.75841	0.545741
centromere_telomere	0.908382	0.608802	0.707516	0.685627	0.503155
human_g1k_v37-N	0.906823	0.608802	0.705882	0.685627	0.503155
segmental_dup	0.666667	0.511002	0.584967	0.545566	0.419558
simplerepeat_lowcomplexity_satellite	0.630019	0.498778	0.566993	0.53578	0.410095
Immunoglobulins_TcellReceptors	0.630019	0.498778	0.566993	0.53578	0.410095
LCL_loci	0.630019	0.498778	0.566993	0.53578	0.410095
het_filter	0.630019	0.498778	0.566993	0.53578	0.410095
frq_gnomAD	0.596881	0.479218	0.534314	0.51315	0.394322
frq_eachdataset	0.385575	0.354523	0.375817	0.387768	0.294953
BAF_validation	0.329825	0.305623	0.334967	0.340673	0.260252

## Sheet: Table S4
Table S4. Statistics on the number and rate of CNVs after each filter step.
filter_step	n_del	n_del_per_sample	nbp_del_per_sample	n_del_aov_p	nbp_del_aov_p	n_dup	n_dup_per_sample	nbp_dup_per_sample	n_dup_aov_p	nbp_dup_aov_p	n_cnv	n_cnv_per_sample	nbp_cnv_per_sample	n_cnv_aov_p	nbp_cnv_aov_p
qual_cnv	3281	0.560376	96299.8	0.0828274	0.181391	5042	0.861144	179420	1.49356e-36	5.14689e-15	8323	1.42152	275720	1.45444e-29	1.62004e-13
centromere_telomere	2895	0.494449	89437.6	0.199447	0.27202	4452	0.760376	161589	1.48285e-25	1.95813e-11	7347	1.25482	251026	1.8569e-20	3.5422e-10
human_g1k_v37-N	2891	0.493766	87546.5	0.215222	0.46788	4447	0.759522	158406	2.17622e-25	5.59482e-12	7338	1.25329	245953	3.01348e-20	4.85132e-10
segmental_dup	2645	0.451751	80261.7	0.404365	0.76762	3435	0.586678	126411	3.94475e-12	1.50894e-05	6080	1.03843	206673	1.09642e-09	0.000111657
simplerepeat_lowcomplexity_satellite	2634	0.449872	79599.4	0.492562	0.866711	3303	0.564133	118687	5.1549e-10	0.00038747	5937	1.01401	198287	6.89064e-08	0.00205554
Immunoglobulins_TcellReceptors	2634	0.449872	79599.4	0.492562	0.866711	3303	0.564133	118687	5.1549e-10	0.00038747	5937	1.01401	198287	6.89064e-08	0.00205554
LCL_loci	2633	0.449701	79569.6	0.502014	0.871433	3303	0.564133	118687	5.1549e-10	0.00038747	5936	1.01383	198257	7.2668e-08	0.00209719
het_filter	2632	0.44953	79548.9	0.511515	0.874665	3303	0.564133	118687	5.1549e-10	0.00038747	5935	1.01366	198236	7.7275e-08	0.00212768
frq_gnomAD	2521	0.430572	76397.1	0.460478	0.8532	3143	0.536806	115417	6.3609e-09	0.00100446	5664	0.967378	191814	3.44423e-07	0.00391941
frq_eachdataset	1573	0.268659	56989.8	0.491673	0.820856	2185	0.373185	94340.2	0.00655873	0.0416711	3758	0.641845	151330	0.00601056	0.0593647
BAF_validation	1566	0.267464	56806.5	0.394676	0.769204	1898	0.324167	87650.4	0.0319957	0.0885646	3464	0.591631	144457	0.0164371	0.0966787

## Sheet: Table S5
Table S5. Global CNV burden test results.
predictor	group	control_rate	n_cases	n_controls	n_samples	n_samples_eff	lm_est	lm_est_95ci_l	lm_est_95ci_u	lm_p	lg_est	lg_est_95ci_l	lg_est_95ci_u	lg_p
n_cnv	ALL	0.56541	2248	3608	5856	5540.15	0.0691379	0.0241903	0.114086	0.00257729	1.11968	1.04298	1.20187	0.00177103
n_del	ALL	0.251109	2248	3608	5856	5540.15	0.0387746	0.00965241	0.0678968	0.00907399	1.15845	1.03817	1.29219	0.00841344
n_dup	ALL	0.314302	2248	3608	5856	5540.15	0.0303634	-0.00408549	0.0648122	0.0840629	1.09107	0.994669	1.1964	0.0641556
n100kb_cnv	ALL	1.27491	2248	3608	5856	5540.15	0.450936	0.245306	0.656565	1.74362e-05	1.03783	1.02069	1.0558	1.65745e-05
n100kb_del	ALL	0.481127	2248	3608	5856	5540.15	0.202471	0.0664077	0.338534	0.00354579	1.04685	1.01717	1.07876	0.00231534
n100kb_dup	ALL	0.793786	2248	3608	5856	5540.15	0.248465	0.0937504	0.40318	0.00165067	1.03341	1.01256	1.05538	0.00181136
n_cnv	leaveoneout_ANGI	0.511026	2248	1043	3291	2849.79	0.104361	0.045988	0.162735	0.000462075	1.19485	1.08186	1.32228	0.000503357
n_del	leaveoneout_ANGI	0.233941	2248	1043	3291	2849.79	0.0497799	0.0115032	0.0880567	0.0108196	1.21555	1.04631	1.41686	0.0115568
n_dup	leaveoneout_ANGI	0.277085	2248	1043	3291	2849.79	0.0545814	0.00960187	0.099561	0.0174053	1.17068	1.02944	1.33597	0.0177021
n_del_nongenic	leaveoneout_ANGI	0.144775	2248	1043	3291	2849.79	0.024664	-0.00494324	0.0542712	0.102496	1.17483	0.969787	1.43033	0.103785
n_dup_nongenic	leaveoneout_ANGI	0.102589	2248	1043	3291	2849.79	0.00330664	-0.0214863	0.0280995	0.793725	1.02964	0.822237	1.2976	0.801539
n_cnv_gt_1mb	leaveoneout_ANGI	0.0105465	2248	1043	3291	2849.79	0.0181634	0.00665476	0.0296721	0.00198851	2.68314	1.46881	5.4004	0.00269817
n_del_pli_50_to_1	leaveoneout_ANGI	0.0115053	2248	1043	3291	2849.79	0.0207946	0.00821739	0.0333719	0.00120003	2.71473	1.53057	5.27366	0.0014125
n_dup_pli_50_to_1	leaveoneout_ANGI	0.0498562	2248	1043	3291	2849.79	0.0427498	0.0212685	0.064231	9.73285e-05	1.82445	1.35621	2.50208	0.000114916
n_cnv	leaveoneout_LG500_ctrls	0.56799	2248	3199	5447	5280.96	0.0812775	0.0333542	0.129201	0.000890594	1.13783	1.05528	1.22683	0.000775883
n_del	leaveoneout_LG500_ctrls	0.252266	2248	3199	5447	5280.96	0.0454826	0.0143781	0.0765872	0.00416509	1.18671	1.05646	1.33271	0.00385733
n_dup	leaveoneout_LG500_ctrls	0.315724	2248	3199	5447	5280.96	0.0357949	-0.000930267	0.07252	0.0560902	1.1021	0.999104	1.21552	0.0518246
n_del_nongenic	leaveoneout_LG500_ctrls	0.162551	2248	3199	5447	5280.96	0.013315	-0.0113269	0.0379568	0.289519	1.08364	0.935486	1.25407	0.28245
n_dup_nongenic	leaveoneout_LG500_ctrls	0.104095	2248	3199	5447	5280.96	0.00940622	-0.0105022	0.0293146	0.354363	1.09025	0.909021	1.30614	0.349736
n_cnv_gt_1mb	leaveoneout_LG500_ctrls	0.0168803	2248	3199	5447	5280.96	0.0160356	0.00708288	0.0249882	0.000449427	1.99056	1.33124	2.99361	0.000848288
n_del_pli_50_to_1	leaveoneout_LG500_ctrls	0.0150047	2248	3199	5447	5280.96	0.0239871	0.0147276	0.0332466	3.93111e-07	2.65102	1.80024	3.94292	1.02825e-06
n_dup_pli_50_to_1	leaveoneout_LG500_ctrls	0.080025	2248	3199	5447	5280.96	0.0190588	0.0011238	0.0369938	0.0372761	1.24862	1.02169	1.52491	0.0296275
n_cnv	leaveoneout_NORDiC-NOR	0.56541	1635	3608	5243	4500.54	0.078802	0.0295927	0.128011	0.00170268	1.13224	1.04911	1.22144	0.0013634
n_del	leaveoneout_NORDiC-NOR	0.251109	1635	3608	5243	4500.54	0.0431648	0.01153	0.0747997	0.00749765	1.17569	1.04415	1.32241	0.00721837
n_dup	leaveoneout_NORDiC-NOR	0.314302	1635	3608	5243	4500.54	0.0356372	-0.00181926	0.0730937	0.0622093	1.10384	0.998463	1.21912	0.0522797
n_del_nongenic	leaveoneout_NORDiC-NOR	0.16214	1635	3608	5243	4500.54	0.0094256	-0.0156505	0.0345016	0.461227	1.0599	0.9098	1.2317	0.451351
n_dup_nongenic	leaveoneout_NORDiC-NOR	0.106707	1635	3608	5243	4500.54	2.92697e-05	-0.0204282	0.0204868	0.997762	1.00519	0.833265	1.20805	0.956355
n_cnv_gt_1mb	leaveoneout_NORDiC-NOR	0.0160754	1635	3608	5243	4500.54	0.0152996	0.00670295	0.0238963	0.000488856	2.05981	1.35651	3.11176	0.000625474
n_del_pli_50_to_1	leaveoneout_NORDiC-NOR	0.0146896	1635	3608	5243	4500.54	0.0237779	0.0146735	0.0328823	3.16491e-07	2.65289	1.80387	3.91501	7.44827e-07
n_dup_pli_50_to_1	leaveoneout_NORDiC-NOR	0.0751109	1635	3608	5243	4500.54	0.0294834	0.0115882	0.0473786	0.00124596	1.41195	1.15008	1.72907	0.000900919
n_cnv	leaveoneout_NORDiC-SWE	0.56541	613	3608	4221	2095.91	0.0691557	-0.000851984	0.139163	0.0528527	1.13151	1.01105	1.26321	0.029505
n_del	leaveoneout_NORDiC-SWE	0.251109	613	3608	4221	2095.91	0.0423092	-0.00303546	0.0876538	0.0674275	1.18223	0.995041	1.39791	0.0533662
n_dup	leaveoneout_NORDiC-SWE	0.314302	613	3608	4221	2095.91	0.0268465	-0.0269828	0.0806758	0.328239	1.09135	0.941815	1.25792	0.235888
n_del_nongenic	leaveoneout_NORDiC-SWE	0.16214	613	3608	4221	2095.91	0.0249437	-0.0114845	0.061372	0.179525	1.17763	0.947236	1.45193	0.133014
n_dup_nongenic	leaveoneout_NORDiC-SWE	0.106707	613	3608	4221	2095.91	0.0106527	-0.0192783	0.0405837	0.485361	1.1047	0.848258	1.41951	0.447544
n_cnv_gt_1mb	leaveoneout_NORDiC-SWE	0.0160754	613	3608	4221	2095.91	0.0204079	0.00818242	0.0326333	0.00107385	2.31768	1.3373	3.90413	0.00198649
n_del_pli_50_to_1	leaveoneout_NORDiC-SWE	0.0146896	613	3608	4221	2095.91	0.0185838	0.00697607	0.0301915	0.00170826	2.33236	1.31212	4.00714	0.00280901
n_dup_pli_50_to_1	leaveoneout_NORDiC-SWE	0.0751109	613	3608	4221	2095.91	0.0217011	-0.00340099	0.0468033	0.0901677	1.34363	0.985418	1.80155	0.054433
n_cnv	leaveoneout_norway_ctrls	0.581708	2248	2974	5222	5121.07	0.0575239	0.00822622	0.106822	0.0222035	1.09509	1.01479	1.18167	0.0193032
n_del	leaveoneout_norway_ctrls	0.255884	2248	2974	5222	5121.07	0.0420909	0.0102726	0.0739092	0.00953135	1.17012	1.03989	1.31637	0.00897406
n_dup	leaveoneout_norway_ctrls	0.325824	2248	2974	5222	5121.07	0.015433	-0.0222642	0.0531302	0.422253	1.04452	0.945405	1.15365	0.390821
n_del_nongenic	leaveoneout_norway_ctrls	0.167787	2248	2974	5222	5121.07	0.00478465	-0.0205358	0.0301051	0.711063	1.02924	0.886539	1.19369	0.703959
n_dup_nongenic	leaveoneout_norway_ctrls	0.110962	2248	2974	5222	5121.07	-0.00110617	-0.0217872	0.0195749	0.916493	0.99041	0.824778	1.18773	0.917447
n_cnv_gt_1mb	leaveoneout_norway_ctrls	0.0171486	2248	2974	5222	5121.07	0.0163429	0.00713711	0.0255486	0.000504937	1.97739	1.31798	2.98735	0.00106504
n_del_pli_50_to_1	leaveoneout_norway_ctrls	0.0154674	2248	2974	5222	5121.07	0.0234175	0.0138503	0.0329848	1.64333e-06	2.53652	1.71482	3.79248	4.05929e-06
n_dup_pli_50_to_1	leaveoneout_norway_ctrls	0.0786819	2248	2974	5222	5121.07	0.0216635	0.00345941	0.0398676	0.0196877	1.28819	1.05003	1.57976	0.0149998
n_cnv	covarloo_FEMALE	0.56541	2248	3608	5856	5540.15	0.0596509	0.0155323	0.10377	0.00805811	1.10414	1.02971	1.1838	0.00534342
n_del	covarloo_FEMALE	0.251109	2248	3608	5856	5540.15	0.0309396	0.00234756	0.0595317	0.0339363	1.1267	1.01184	1.25415	0.0293442
n_dup	covarloo_FEMALE	0.314302	2248	3608	5856	5540.15	0.0287113	-0.00508948	0.0625121	0.0959281	1.08639	0.991812	1.18963	0.0739484
n_cnv	covarloo_LRR_SD	0.56541	2248	3608	5856	5540.15	0.0659828	0.0222744	0.109691	0.00309472	1.11074	1.03669	1.18986	0.00280242
n_del	covarloo_LRR_SD	0.251109	2248	3608	5856	5540.15	0.0398683	0.0115497	0.0681869	0.00579983	1.16276	1.04549	1.2926	0.0053191
n_dup	covarloo_LRR_SD	0.314302	2248	3608	5856	5540.15	0.0261145	-0.00738664	0.0596155	0.126535	1.07333	0.980772	1.17404	0.122842
n_cnv	covarloo_PC1	0.56541	2248	3608	5856	5540.15	0.0764583	0.0316948	0.121222	0.000817904	1.13147	1.05436	1.2141	0.000596333
n_del	covarloo_PC1	0.251109	2248	3608	5856	5540.15	0.0426854	0.0136908	0.07168	0.00391566	1.17585	1.05439	1.31084	0.00352687
n_dup	covarloo_PC1	0.314302	2248	3608	5856	5540.15	0.0337729	-0.000515511	0.0680614	0.0535441	1.09923	1.00248	1.20492	0.0436746
n_cnv	covarloo_PC2	0.56541	2248	3608	5856	5540.15	0.0716031	0.026864	0.116342	0.00171245	1.12345	1.04686	1.20552	0.00121842
n_del	covarloo_PC2	0.251109	2248	3608	5856	5540.15	0.0403354	0.0113486	0.0693223	0.00639352	1.16536	1.04504	1.29905	0.00581649
n_dup	covarloo_PC2	0.314302	2248	3608	5856	5540.15	0.0312676	-0.00301851	0.0655538	0.0738631	1.09272	0.996512	1.19777	0.058706
n_cnv	covarloo_PC3	0.56541	2248	3608	5856	5540.15	0.0683469	0.0233894	0.113304	0.00289184	1.11717	1.04069	1.19912	0.00216938
n_del	covarloo_PC3	0.251109	2248	3608	5856	5540.15	0.0386431	0.00952607	0.0677601	0.00929874	1.15775	1.03754	1.29139	0.00868588
n_dup	covarloo_PC3	0.314302	2248	3608	5856	5540.15	0.0297038	-0.0047552	0.0641629	0.0911105	1.08755	0.991512	1.19247	0.0744962
n_cnv	covarloo_PC4	0.56541	2248	3608	5856	5540.15	0.0690026	0.0240624	0.113943	0.00262352	1.11921	1.04256	1.20134	0.00183754
n_del	covarloo_PC4	0.251109	2248	3608	5856	5540.15	0.0389261	0.00980783	0.0680443	0.00879825	1.15901	1.03868	1.2928	0.00819769
n_dup	covarloo_PC4	0.314302	2248	3608	5856	5540.15	0.0300765	-0.00437015	0.0645232	0.0870117	1.08993	0.993654	1.19512	0.0673405
n_cnv	covarloo_PC5	0.56541	2248	3608	5856	5540.15	0.0688869	0.0239446	0.113829	0.00266857	1.11957	1.04288	1.20174	0.00178663
n_del	covarloo_PC5	0.251109	2248	3608	5856	5540.15	0.0387684	0.00965138	0.0678854	0.00907279	1.15842	1.03815	1.29215	0.00842292
n_dup	covarloo_PC5	0.314302	2248	3608	5856	5540.15	0.0301185	-0.00432741	0.0645644	0.0865652	1.0909	0.994529	1.1962	0.0645886
n_cnv	covarloo_PC7	0.56541	2248	3608	5856	5540.15	0.068334	0.0233791	0.113289	0.00289551	1.11854	1.04194	1.20061	0.00194261
n_del	covarloo_PC7	0.251109	2248	3608	5856	5540.15	0.0382375	0.00911001	0.0673651	0.010092	1.15671	1.03666	1.29019	0.00907759
n_dup	covarloo_PC7	0.314302	2248	3608	5856	5540.15	0.0300965	-0.00434718	0.0645401	0.086775	1.09038	0.994044	1.19564	0.0660989
n_del_30kb_to_100kb	ALL	0.10255	2248	3608	5856	5540.15	0.0154996	-0.00294659	0.0339457	0.0995666	1.15529	0.971271	1.37235	0.101461
n_del_100kb_to_500kb	ALL	0.133315	2248	3608	5856	5540.15	0.0158193	-0.00546994	0.0371086	0.145257	1.12078	0.964335	1.3016	0.135947
n_del_500kb_to_1mb	ALL	0.00970067	2248	3608	5856	5540.15	-0.00043372	-0.00595605	0.00508861	0.877642	0.975903	0.540638	1.72256	0.933906
n_del_gt_1mb	ALL	0.00554324	2248	3608	5856	5540.15	0.00788944	0.00267804	0.0131008	0.00301189	2.40141	1.31442	4.47845	0.00485368
n_dup_30kb_to_100kb	ALL	0.101164	2248	3608	5856	5540.15	0.00827797	-0.0106254	0.0271813	0.39067	1.08344	0.913272	1.28358	0.355638
n_dup_100kb_to_500kb	ALL	0.179878	2248	3608	5856	5540.15	0.00712048	-0.0179621	0.032203	0.577881	1.04377	0.918528	1.18489	0.509402
n_dup_500kb_to_1mb	ALL	0.0227273	2248	3608	5856	5540.15	0.0073684	-0.0017444	0.0164812	0.112995	1.33707	0.944858	1.88783	0.0992398
n_dup_gt_1mb	ALL	0.0105322	2248	3608	5856	5540.15	0.00759651	0.00113481	0.0140582	0.021221	1.76943	1.08572	2.89195	0.0219398
n_cnv_30kb_to_100kb	ALL	0.203714	2248	3608	5856	5540.15	0.0237775	-0.00275811	0.0503132	0.0790367	1.11704	0.989716	1.25996	0.0721867
n_cnv_100kb_to_500kb	ALL	0.313193	2248	3608	5856	5540.15	0.0229398	-0.00986298	0.0557426	0.170448	1.07585	0.975838	1.1856	0.14089
n_cnv_500kb_to_1mb	ALL	0.0324279	2248	3608	5856	5540.15	0.00693468	-0.0036477	0.0175171	0.198969	1.23233	0.913389	1.65798	0.168947
n_cnv_gt_1mb	ALL	0.0160754	2248	3608	5856	5540.15	0.0154859	0.00723762	0.0237343	0.000234849	2.01292	1.37522	2.95888	0.000335325
n_cnv_freq0to1	ALL	0.199279	2248	3608	5856	5540.15	0.0440643	0.0168733	0.0712554	0.00149651	1.20905	1.07673	1.35731	0.00130392
n_cnv_freq2to5	ALL	0.212306	2248	3608	5856	5540.15	0.0212269	-0.00571145	0.0481652	0.122465	1.10306	0.979474	1.24143	0.10459
n_cnv_freq6to10	ALL	0.0936807	2248	3608	5856	5540.15	0.00130231	-0.0162365	0.0188412	0.884272	1.01742	0.842014	1.22511	0.85663
n_cnv_freq11to38	ALL	0.0601441	2248	3608	5856	5540.15	0.00254443	-0.0121855	0.0172743	0.734899	1.04157	0.839668	1.28897	0.709026
n_del_freq0to1	ALL	0.0920177	2248	3608	5856	5540.15	0.0234264	0.00493338	0.0419194	0.0130436	1.2398	1.04479	1.47065	0.0136556
n_del_freq2to5	ALL	0.106984	2248	3608	5856	5540.15	0.0126584	-0.00605466	0.0313715	0.184862	1.12386	0.94752	1.33093	0.17768
n_del_freq6to10	ALL	0.0354767	2248	3608	5856	5540.15	0.00617863	-0.00472091	0.0170782	0.266495	1.185	0.876709	1.59222	0.264195
n_del_freq11to38	ALL	0.0166297	2248	3608	5856	5540.15	-0.00348885	-0.0107689	0.0037912	0.347525	0.825395	0.527213	1.27396	0.392426
n_dup_freq0to1	ALL	0.107262	2248	3608	5856	5540.15	0.020638	0.00032309	0.0409528	0.0464671	1.17703	1.00772	1.37371	0.0389867
n_dup_freq2to5	ALL	0.105322	2248	3608	5856	5540.15	0.00856846	-0.0107383	0.0278752	0.384324	1.084	0.918022	1.27859	0.339525
n_dup_freq6to10	ALL	0.058204	2248	3608	5856	5540.15	-0.00487633	-0.018612	0.00885929	0.486483	0.922551	0.72079	1.17235	0.515367
n_dup_freq11to38	ALL	0.0435144	2248	3608	5856	5540.15	0.00603328	-0.00683404	0.0189006	0.358036	1.12084	0.876621	1.43062	0.360044
n_del_nongenic	ALL	0.16214	2248	3608	5856	5540.15	0.00992889	-0.0131666	0.0330243	0.399388	1.06193	0.92385	1.21929	0.395711
n_del_genic	ALL	0.088969	2248	3608	5856	5540.15	0.0288457	0.0107126	0.0469788	0.00182651	1.318	1.1076	1.56821	0.00184136
n_dup_nongenic	ALL	0.106707	2248	3608	5856	5540.15	-0.000337828	-0.0192118	0.0185361	0.97201	1.00278	0.846025	1.18666	0.974293
n_dup_genic	ALL	0.207594	2248	3608	5856	5540.15	0.0307012	0.00305806	0.0583443	0.0295027	1.14397	1.01939	1.28308	0.0218459
n_cnv_nongenic	ALL	0.268847	2248	3608	5856	5540.15	0.00959106	-0.0202783	0.0394604	0.529062	1.0376	0.931841	1.15462	0.499582
n_cnv_genic	ALL	0.296563	2248	3608	5856	5540.15	0.0595469	0.0263521	0.0927416	0.000440366	1.19202	1.08346	1.31133	0.000307673
ngenes_del	ALL	0.19235	2248	3608	5856	5540.15	0.127299	0.0510517	0.203546	0.00107052	1.07449	1.02829	1.1271	0.00198976
ngenes_dup	ALL	0.573171	2248	3608	5856	5540.15	0.204162	0.0664794	0.341845	0.00366372	1.03567	1.01193	1.06084	0.00347557
ngenes_cnv	ALL	0.765521	2248	3608	5856	5540.15	0.331461	0.174785	0.488137	3.41134e-05	1.04465	1.02326	1.06727	4.60182e-05
n_del_pli_0_to_50	ALL	0.0742794	2248	3608	5856	5540.15	0.00626537	-0.0098724	0.0224031	0.446629	1.08083	0.886993	1.315	0.43857
n_del_pli_50_to_1	ALL	0.0146896	2248	3608	5856	5540.15	0.0225803	0.0140171	0.0311435	2.42778e-07	2.56293	1.77811	3.7233	5.61683e-07
n_del_pli_50_to_995	ALL	0.0105322	2248	3608	5856	5540.15	0.0110366	0.00433752	0.0177358	0.00124622	2.10385	1.32761	3.35232	0.00159195
n_del_pli_995_to_1	ALL	0.00415743	2248	3608	5856	5540.15	0.0115437	0.00643456	0.0166528	9.62604e-06	4.11894	2.16609	8.1573	2.53938e-05
n_dup_pli_0_to_50	ALL	0.132483	2248	3608	5856	5540.15	0.00255006	-0.0186373	0.0237374	0.813483	1.02375	0.879413	1.19016	0.760978
n_dup_pli_50_to_1	ALL	0.0751109	2248	3608	5856	5540.15	0.0281511	0.0116326	0.0446696	0.000840323	1.40162	1.15656	1.698	0.00056198
n_dup_pli_50_to_995	ALL	0.0432373	2248	3608	5856	5540.15	0.0123448	-5.94321e-05	0.0247491	0.0511075	1.31821	1.02063	1.69925	0.0333837
n_dup_pli_995_to_1	ALL	0.0318736	2248	3608	5856	5540.15	0.0158063	0.00504017	0.0265724	0.00401508	1.53962	1.14437	2.07053	0.00428557
n_cnv_pli_0_to_50	ALL	0.206763	2248	3608	5856	5540.15	0.00881544	-0.0179306	0.0355615	0.518218	1.04403	0.926379	1.17595	0.478711
n_cnv_pli_50_to_1	ALL	0.0898004	2248	3608	5856	5540.15	0.0507315	0.0321384	0.0693245	9.18475e-08	1.59904	1.34911	1.89628	6.37448e-08
n_cnv_pli_50_to_995	ALL	0.0537694	2248	3608	5856	5540.15	0.0233815	0.00927839	0.0374845	0.0011602	1.46941	1.17621	1.83481	0.000682685
n_cnv_pli_995_to_1	ALL	0.036031	2248	3608	5856	5540.15	0.02735	0.0155242	0.0391758	5.90843e-06	1.85364	1.41626	2.42874	7.13997e-06
n_del_phaplo_ge_86	ALL	0.0138581	2248	3608	5856	5540.15	0.0126848	0.00502272	0.0203469	0.00117925	1.92442	1.27986	2.90142	0.00166899
n_del_phaplo_lt_86	ALL	0.237251	2248	3608	5856	5540.15	0.0260898	-0.00193838	0.054118	0.0680832	1.11455	0.994205	1.24883	0.0621888
n_del_ptriplo_ge_94	ALL	0.00554324	2248	3608	5856	5540.15	0.00364585	-0.00108561	0.00837731	0.130951	1.63343	0.833262	3.21739	0.152104
n_del_ptriplo_lt_94	ALL	0.245565	2248	3608	5856	5540.15	0.0351287	0.00632318	0.0639343	0.016848	1.14691	1.02652	1.28086	0.0151798
n_dup_phaplo_ge_86	ALL	0.0709534	2248	3608	5856	5540.15	0.0204215	0.00407325	0.0367699	0.0143623	1.28313	1.05691	1.5561	0.0114388
n_dup_phaplo_lt_86	ALL	0.243348	2248	3608	5856	5540.15	0.00994182	-0.019259	0.0391426	0.504521	1.04423	0.935642	1.16463	0.438181
n_dup_ptriplo_ge_94	ALL	0.0202328	2248	3608	5856	5540.15	0.0011502	-0.00722581	0.0095262	0.787786	1.07312	0.727338	1.56761	0.717887
n_dup_ptriplo_lt_94	ALL	0.294069	2248	3608	5856	5540.15	0.0292132	-0.00398019	0.0624065	0.0845256	1.0936	0.993487	1.20337	0.0670945
n_del_phaplotriplo_1	ALL	0.00166297	2248	3608	5856	5540.15	0.00474236	0.00151896	0.00796576	0.00393898	3.97518	1.45349	12.3729	0.0102594
n_del_phaplotriplo_0	ALL	0.249446	2248	3608	5856	5540.15	0.0340322	0.00504597	0.0630185	0.0213908	1.14029	1.02122	1.27271	0.0193728
n_dup_phaplotriplo_1	ALL	0.0135809	2248	3608	5856	5540.15	-0.000950138	-0.00774492	0.00584465	0.783998	0.957227	0.588516	1.527	0.856736
n_dup_phaplotriplo_0	ALL	0.300721	2248	3608	5856	5540.15	0.0313135	-0.00223754	0.0648646	0.067356	1.09819	0.998695	1.20717	0.0526779
n_dup_g1_genic	ALL	0.0853659	2248	3608	5856	5540.15	0.00646758	-0.0110012	0.0239363	0.467989	1.0723	0.892025	1.2872	0.455227
n_del_g1_genic	ALL	0.0382483	2248	3608	5856	5540.15	0.010966	-0.00085517	0.0227873	0.0690308	1.28702	0.985222	1.67942	0.0633098
n_dup_g1_pli_0_to_50	ALL	0.0620843	2248	3608	5856	5540.15	-0.00283931	-0.0170807	0.0114021	0.69593	0.954872	0.760148	1.1956	0.689092
n_dup_g1_pli_50_to_1	ALL	0.0232816	2248	3608	5856	5540.15	0.0093069	2.84023e-05	0.0185854	0.049303	1.42621	1.01079	2.00905	0.0424067
n_dup_g1_pli_50_to_995	ALL	0.011918	2248	3608	5856	5540.15	0.00412533	-0.00262546	0.0108761	0.230981	1.35053	0.843377	2.1563	0.208031
n_dup_g1_pli_995_to_1	ALL	0.0113636	2248	3608	5856	5540.15	0.00518156	-0.00110295	0.0114661	0.106079	1.53125	0.917942	2.53886	0.0994539
n_del_g1_pli_0_to_50	ALL	0.0340909	2248	3608	5856	5540.15	0.00310384	-0.00770605	0.0139137	0.573538	1.09727	0.816193	1.4693	0.535267
n_del_g1_pli_50_to_1	ALL	0.00415743	2248	3608	5856	5540.15	0.0078622	0.00313462	0.0125898	0.00111975	2.94508	1.5089	5.93905	0.00186228
n_del_g1_pli_50_to_995	ALL	0.00249446	2248	3608	5856	5540.15	0.00419015	0.000641223	0.00773907	0.0206709	2.76328	1.14186	7.02026	0.026485
n_del_g1_pli_995_to_1	ALL	0.00166297	2248	3608	5856	5540.15	0.00367206	0.000532284	0.00681183	0.0219	3.17276	1.15412	9.59046	0.0296234
n_del_neurodev	ALL	0.00221729	2248	3608	5856	5540.15	0.00320976	-0.000100301	0.00651982	0.0573554	2.43273	0.947883	6.56705	0.0679991
n_del_NDD	ALL	0.00166297	2248	3608	5856	5540.15	0.00562354	0.00215368	0.00909341	0.00149513	4.48497	1.72337	13.2207	0.00335945
n_del_NDD0	ALL	0.249446	2248	3608	5856	5540.15	0.033151	0.00421854	0.0620835	0.0247281	1.13629	1.01743	1.26847	0.0231026
n_dup_neurodev	ALL	0.00249446	2248	3608	5856	5540.15	0.00375364	0.000205089	0.00730219	0.0381537	2.53423	1.05254	6.39043	0.0407554
n_dup_NDD	ALL	0.0105322	2248	3608	5856	5540.15	0.0111389	0.00447826	0.0177996	0.00105004	2.18906	1.36181	3.53965	0.00126017
n_dup_NDD0	ALL	0.303769	2248	3608	5856	5540.15	0.0192244	-0.0144389	0.0528877	0.262961	1.0623	0.966129	1.16751	0.210584
n_cnv_neurodev	ALL	0.00471175	2248	3608	5856	5540.15	0.0069634	0.00212036	0.0118064	0.00483882	2.49423	1.30906	4.86739	0.00603734
n_cnv_NDD	ALL	0.0121951	2248	3608	5856	5540.15	0.0167625	0.00928041	0.0242445	1.14336e-05	2.53933	1.66171	3.91302	1.90692e-05
n_cnv_NDD0	ALL	0.553215	2248	3608	5856	5540.15	0.0523755	0.00812641	0.0966245	0.0203538	1.09384	1.01764	1.17553	0.0147457
n_del_pli_0_to_50	male_vs_female	0.0912921	824	1424	2248	2087.86	-0.0258956	-0.0513365	-0.000454636	0.0460474	0.731472	0.532135	0.990115	0.0477833
n_del_pli_50_to_1	male_vs_female	0.0407303	824	1424	2248	2087.86	-0.0161361	-0.0325172	0.000244858	0.0535212	0.612814	0.361426	0.993553	0.0561352
n_del_pli_50_to_995	male_vs_female	0.0238764	824	1424	2248	2087.86	-0.0105105	-0.0225895	0.00156861	0.0880794	0.553276	0.265605	1.06615	0.0916992
n_del_pli_995_to_1	male_vs_female	0.0168539	824	1424	2248	2087.86	-0.00562568	-0.0159873	0.00473593	0.287123	0.658322	0.287559	1.37955	0.289861
n_dup_pli_0_to_50	male_vs_female	0.143961	824	1424	2248	2087.86	-0.0238968	-0.0562406	0.00844707	0.147513	0.838863	0.658662	1.05996	0.147009
n_dup_pli_50_to_1	male_vs_female	0.0863764	824	1424	2248	2087.86	0.025317	-0.00154438	0.0521784	0.0646942	1.28926	0.982343	1.6876	0.0651732
n_dup_pli_50_to_995	male_vs_female	0.0484551	824	1424	2248	2087.86	0.00966211	-0.0103515	0.0296758	0.343876	1.19216	0.824457	1.71185	0.343924
n_dup_pli_995_to_1	male_vs_female	0.0379213	824	1424	2248	2087.86	0.0156549	-0.00212251	0.0334323	0.0843254	1.4277	0.947992	2.14064	0.0855791
nkbp_del_cons	ALL	1.10452	2248	3608	5856	5540.15	0.205988	0.0460304	0.365945	0.0116126	1.03429	1.01012	1.06032	0.00633514
nkbp_del_cons0to3	ALL	26.7758	2248	3608	5856	5540.15	1.26932	-0.130838	2.66948	0.0755903	1.0027	0.999841	1.00545	0.0593281
nkbp_del_cons3to6	ALL	0.465033	2248	3608	5856	5540.15	0.0743383	0.00839752	0.140279	0.0271422	1.07389	1.01448	1.13992	0.0164073
nkbp_del_cons6to9	ALL	0.169965	2248	3608	5856	5540.15	0.0810464	0.0309803	0.131112	0.00151433	1.11106	1.03967	1.1927	0.0025028
nkbp_dup_cons	ALL	2.15642	2248	3608	5856	5540.15	-0.0470998	-0.268731	0.174532	0.676982	0.998066	0.983389	1.01245	0.793798
nkbp_dup_cons0to3	ALL	44.3944	2248	3608	5856	5540.15	-1.4435	-3.13599	0.248992	0.0945841	0.998461	0.996548	1.00031	0.107434
nkbp_dup_cons3to6	ALL	0.904999	2248	3608	5856	5540.15	-0.0312768	-0.127779	0.0652251	0.525214	0.991793	0.958426	1.02505	0.629626
nkbp_dup_cons6to9	ALL	0.420372	2248	3608	5856	5540.15	0.0103626	-0.0563318	0.077057	0.760689	1.01042	0.962666	1.05941	0.670246
nkbp_del_cons_nc	ALL	0.49049	2248	3608	5856	5540.15	0.00089243	-0.0519348	0.0537197	0.973582	1.00273	0.942291	1.06667	0.931175
nkbp_del_cons0to3_nc	ALL	14.2681	2248	3608	5856	5540.15	0.000552984	-0.462667	0.463773	0.998133	0.999883	0.992984	1.00689	0.973535
nkbp_del_cons3to6_nc	ALL	0.213206	2248	3608	5856	5540.15	0.000908618	-0.0238388	0.025656	0.942623	1.00853	0.883203	1.15072	0.899596
nkbp_del_cons6to9_nc	ALL	0.0403185	2248	3608	5856	5540.15	0.000926829	-0.00688023	0.00873388	0.81598	1.07342	0.69977	1.62882	0.741631
nkbp_dup_cons_nc	ALL	0.337879	2248	3608	5856	5540.15	-0.0383934	-0.0975369	0.0207501	0.203215	0.962096	0.905766	1.0176	0.191868
nkbp_dup_cons0to3_nc	ALL	9.42785	2248	3608	5856	5540.15	-0.442099	-0.992168	0.107969	0.115176	0.995243	0.989061	1.00101	0.116509
nkbp_dup_cons3to6_nc	ALL	0.148429	2248	3608	5856	5540.15	-0.0165369	-0.0441574	0.0110835	0.240557	0.927581	0.816633	1.04466	0.229887
nkbp_dup_cons6to9_nc	ALL	0.0328681	2248	3608	5856	5540.15	-0.0042644	-0.0158505	0.00732167	0.470607	0.89785	0.65161	1.18809	0.473754

## Sheet: Table S6
Table S6. Summary statistics from gene-based CNV burden tests.
locus_name	nca_1_tot	nco_1_tot	nca_0_tot	nco_0_tot	breslowday_p	cmh_or	cmh_95ci_l	cmh_95ci_u	cmh_p	cmh_p_expected
LRRTM3_DUP	5	1	2243	3607	0.380351	11.8008	1.26813	109.814	0.0262674	0.0304824
ZNF92_DEL	11	4	2237	3604	0.252615	4.10485	1.22297	13.7778	0.0310604	0.0532927
ZC3H18,ZFPM1_DUP	4	0	2244	3608	0.468568	inf			0.0578436	0.0742517
CETN1,CLUL1,COLEC12_DUP	3	0	2245	3608	0.455404	inf			0.107597	0.0896774
CHRNA7_DEL	3	0	2245	3608	0.455404	inf			0.107597	0.102365
FAN1,KLF13,MTMR10,OTUD7A,TRPM1_DEL	3	0	2245	3608	0.455404	inf			0.107597	0.111886
FAM115A,OR2A12,OR2A14,OR2A2,OR2A25,OR2A5,OR2F1,OR2F2,OR6B1_DEL	2	0	2246	3608	0.319298	inf			0.129583	0.118992
CCSER1_DEL	2	0	2246	3608	0.319298	inf			0.129583	0.125244
PCDH15_DEL	2	0	2246	3608	0.319298	inf			0.129583	0.130769
FAT1,MTNR1A_DUP	2	0	2246	3608	0.319298	inf			0.129583	0.136403
COL18A1_DEL	2	0	2246	3608	0.319298	inf			0.129583	0.142903
DOCK4_DEL	2	0	2246	3608	0.319298	inf			0.129583	0.150869
CBR3,DOPEY2_DUP	8	6	2240	3602	0.167207	2.4962	0.846255	7.36302	0.131642	0.15908
CHRNA7_DUP	7	3	2241	3605	0.895838	4.13146	0.882948	19.3318	0.148495	0.168442
AP3S1,AQPEP,ARL14EPL,COMMD10_DUP	1	8	2247	3600	0.637786	0.232441	0.033042	1.63515	0.168179	0.178442
CDH19_DEL	1	8	2247	3600	0.513453	0.23876	0.0340921	1.67213	0.176905	0.188603
GLIS3,SLC1A1_DUP	1	8	2247	3600	0.841401	0.113626	0.00856208	1.50792	0.176905	0.198906
SLC7A13_DUP	0	5	2248	3603	0.759268	0			0.196358	0.209193
SRBD1_DUP	3	0	2245	3608	0.672775	inf			0.241024	0.218949
AIFM3,ARVCF,C22orf29,C22orf39,CDC45,CLDN5,CLTCL1,COMT,CRKL,DGCR14,DGCR2,DGCR6,DGCR6L,DGCR8,GNB1L,GP1BB,GSC2,HIRA,KLHL22,LZTR1,MED15,MRPL40,P2RX6,PI4KA,PRODH,RANBP1,RIMBP3,RTN4R,SCARF2,SEPT5,SERPIND1,SLC25A1,SLC7A4,SNAP29,TANGO2,TBX1,THAP7,TRMT2A,TSSK2,TXNRD2,UFD1L,ZDHHC8,ZNF74_DUP	4	2	2244	3606	0.806943	4.26215	0.677848	26.7994	0.253246	0.228741
AGMO_DUP	3	2	2245	3606	0.506146	4.00888	0.668889	24.0265	0.253578	0.237934
FRMD1,KIF25_DUP	18	16	2230	3592	0.825344	1.61388	0.776124	3.35592	0.273594	0.246746
LRBA_DUP	1	6	2247	3602	0.432103	0.291134	0.0413508	2.04976	0.285241	0.254813
AKAP13_DUP	3	0	2245	3608	0.626084	inf			0.290726	0.263102
AIFM3,ARVCF,C22orf29,C22orf39,CDC45,CLDN5,CLTCL1,COMT,CRKL,DGCR14,DGCR2,DGCR6,DGCR6L,DGCR8,GNB1L,GP1BB,GSC2,HIRA,KLHL22,LZTR1,MED15,MRPL40,P2RX6,PI4KA,PRODH,RANBP1,RIMBP3,RTN4R,SCARF2,SEPT5,SERPIND1,SLC25A1,SLC7A4,SNAP29,TANGO2,TBX1,THAP7,TRMT2A,TSSK2,TXNRD2,UFD1L,ZDHHC8,ZNF74_DEL	3	1	2245	3607	0.267744	4.46741	0.516929	38.6084	0.292153	0.270931
RBFOX1_DEL	3	0	2245	3608	0.738563	inf			0.294539	0.277729
SPINK5_DEL	3	0	2245	3608	0.738563	inf			0.294539	0.283855
MEP1B_DEL	2	0	2246	3608	0.549174	inf			0.29674	0.290611
ABCA2,ANAPC2,C9orf139,C9orf169,C9orf173,DPP7,ENTPD2,EXD3,FAM166A,FUT7,GRIN1,LRRC26,MAN1B1,NDOR1,NELFB,NPDC1,NRARP,RNF208,RNF224,SAPCD2,SLC34A3,SSNA1,TMEM203,TMEM210,TOR4A,TPRN,TUBB4B,UAP1L1_DEL	2	0	2246	3608	0.549174	inf			0.29674	0.296818
GPR89A,PDZK1_DEL	2	0	2246	3608	0.549174	inf			0.29674	0.302757
SDK1_DEL	2	0	2246	3608	0.549174	inf			0.29674	0.309324
ST6GALNAC3_DEL	2	0	2246	3608	0.549174	inf			0.29674	0.315901
SV2C_DUP	0	3	2248	3605	0.752646	0			0.319061	0.322742
ANXA1_DUP	0	3	2248	3605	0.728078	0			0.336663	0.328434
ADRBK2_DUP	0	3	2248	3605	0.728078	0			0.336663	0.334679
WWOX_DUP	0	3	2248	3605	0.728078	0			0.336663	0.340351
ANGPT2,MCPH1_DUP	0	3	2248	3605	0.728078	0			0.336663	0.34674
ZNF92_DUP	3	8	2245	3600	0.293006	0.471477	0.128508	1.72979	0.341877	0.352388
GRM6,ZNF354C,ZNF879_DUP	2	0	2246	3608	0.573004	inf			0.361738	0.358157
MYOM2_DEL	2	1	2246	3607	0.5172	5.34187	0.483858	58.9751	0.376631	0.363976
ABI2,CARF,CYP20A1,FAM117B,ICA1L,NBEAL1,WDR12_DUP	2	1	2246	3607	0.5172	5.34187	0.483858	58.9751	0.376631	0.369544
CDRT15,COX10,HS3ST3B1,PMP22,TEKT3,TVP23C,TVP23C-CDRT4_DEL	4	3	2244	3605	0.723489	2.93228	0.583744	14.7295	0.376962	0.375303
EML5,TTC8_DUP	0	3	2248	3605	0.908719	0			0.378519	0.380398
ELOVL6_DUP	0	3	2248	3605	0.908719	0			0.378519	0.38549
PDE1C_DUP	1	7	2247	3601	0.852058	0.155952	0.00992093	2.4515	0.378909	0.390115
C9orf62_DUP	8	8	2240	3600	0.374363	1.76292	0.643137	4.83238	0.379289	0.394916
CGNL1_DUP	2	7	2246	3601	0.451594	0.430129	0.0954039	1.93924	0.389486	0.399905
FPR3,ZNF350,ZNF432,ZNF577,ZNF613,ZNF614,ZNF615,ZNF649,ZNF841_DUP	6	4	2242	3604	0.653103	2.13973	0.566953	8.0755	0.392793	0.404593
CNTNAP2_DEL	2	0	2246	3608	0.670809	inf			0.410797	0.409414
CHN2_DUP	2	0	2246	3608	0.670809	inf			0.410797	0.413599
IGSF6,METTL9,OTOA_DUP	2	0	2246	3608	0.670809	inf			0.410797	0.417448
PARD3_DUP	2	0	2246	3608	0.670809	inf			0.410797	0.421453
KRT84,KRT85_DUP	2	0	2246	3608	0.670809	inf			0.410797	0.425288
EVC2_DEL	2	0	2246	3608	0.670809	inf			0.410797	0.428817
ADCYAP1,ENOSF1,TYMS,YES1_DUP	2	0	2246	3608	0.670809	inf			0.410797	0.43231
DOCK4_DUP	2	0	2246	3608	0.670809	inf			0.410797	0.435869
DLG2_DEL	2	0	2246	3608	0.670809	inf			0.410797	0.438881
GUCA1C,MORC1_DUP	0	4	2248	3604	0.986472	0			0.413697	0.441401
CNTN4_DEL	0	4	2248	3604	0.986472	0			0.413697	0.443895
KIF1A_DUP	4	2	2244	3606	0.916636	3.60778	0.511028	25.4704	0.419467	0.44621
ACYP2_DEL	2	0	2246	3608	0.723648	inf			0.442671	0.448116
UGT1A8_DEL	1	4	2247	3604	0.609706	0.294769	0.0345732	2.51318	0.442721	0.449858
UGT1A3,UGT1A4,UGT1A5,UGT1A6,UGT1A7,UGT1A9_DEL	1	4	2247	3604	0.609706	0.294769	0.0345732	2.51318	0.442721	0.451152
CYP2C18_DEL	4	3	2244	3605	0.442244	2.30913	0.509341	10.4686	0.452227	0.452438
COL4A3,COL4A4,RHBDD1_DUP	1	1	2247	3607	0.991123	1.09167	0.0277748	42.9071	0.45678	0.45331
ATP10A,GABRA5,GABRB3,GABRG3,HERC2,MKRN3,NDN,NPAP1,OCA2,SNRPN,SNURF,UBE3A_DUP	1	1	2247	3607	0.229253	1.0356	0.101962	10.5183	0.45678	0.454103
MSR1,SGCZ,TUSC3_DUP	1	1	2247	3607	0.991123	1.09167	0.0277748	42.9071	0.45678	0.454819
FER1L6,TMEM65_DUP	1	1	2247	3607	0.229253	1.0356	0.101962	10.5183	0.45678	0.455442
AFAP1,SORCS2_DEL	0	2	2248	3606	0.662331	0			0.45678	0.455895
SCN7A_DEL	1	1	2247	3607	0.991123	1.09167	0.0277748	42.9071	0.45678	0.456338
CHL1_DUP	1	1	2247	3607	0.991123	1.09167	0.0277748	42.9071	0.45678	0.456753
HS6ST1_DUP	1	1	2247	3607	0.229253	1.0356	0.101962	10.5183	0.45678	0.457283
CADPS2_DEL	0	2	2248	3606	0.662331	0			0.45678	0.457851
EXOC4,LRGUK_DEL	1	1	2247	3607	0.991123	1.09167	0.0277748	42.9071	0.45678	0.458541
DCTD,WWC2_DUP	1	1	2247	3607	0.991123	1.09167	0.0277748	42.9071	0.45678	0.459462
ASTN2,TRIM32_DUP	1	1	2247	3607	0.991123	1.09167	0.0277748	42.9071	0.45678	0.460378
ADORA2A,C22orf15,CABIN1,CHCHD10,DDT,DDTL,DERL3,FAM211B,GGT1,GGT5,GSTT1,GSTT2,GSTT2B,GUCD1,MIF,MMP11,RGL4,SLC2A11,SMARCB1,SNRPD3,SPECC1L,SUSD2,UPB1,VPREB3,ZNF70_DUP	0	2	2248	3606	0.662331	0			0.45678	0.461516
NBAS_DUP	1	1	2247	3607	0.991123	1.09167	0.0277748	42.9071	0.45678	0.463013
GRIN3A_DUP	0	2	2248	3606	0.662331	0			0.45678	0.464655
NQO2,RIPK1,SERPINB1,SERPINB6,SERPINB9_DUP	1	1	2247	3607	0.991123	1.09167	0.0277748	42.9071	0.45678	0.466796
FAM83G,GRAP,PRPSAP2,SLC5A10_DUP	1	1	2247	3607	0.229253	1.0356	0.101962	10.5183	0.45678	0.469377
BMPER_DEL	1	1	2247	3607	0.991123	1.09167	0.0277748	42.9071	0.45678	0.472232
ARPP21_DUP	0	2	2248	3606	0.662331	0			0.45678	0.475633
MYLK3,ORC6,SHCBP1,VPS35_DUP	1	1	2247	3607	0.991123	1.09167	0.0277748	42.9071	0.45678	0.479026
CDCP1,CLEC3B,EXOSC7,TMEM158,ZDHHC3_DUP	1	1	2247	3607	0.991123	1.09167	0.0277748	42.9071	0.45678	0.483365
PIK3CA_DUP	1	1	2247	3607	0.991123	1.09167	0.0277748	42.9071	0.45678	0.487311
SLC22A25,SLC22A6,SLC22A8_DEL	1	1	2247	3607	0.991123	1.09167	0.0277748	42.9071	0.45678	0.491885
CNTN6_DEL	0	3	2248	3605	0.915727	0			0.474488	0.49651
ARHGAP5,NUBPL_DUP	0	3	2248	3605	0.915727	0			0.474488	0.501422
C22orf43,IGLL1_DEL	0	3	2248	3605	0.915727	0			0.474488	0.506351
MLLT4_DUP	4	11	2244	3597	0.396933	0.593267	0.190282	1.8497	0.502505	0.511802
BCAR1_DUP	0	4	2248	3604	0.935013	0			0.506901	0.51686
NINJ2,RAD52,WNK1_DUP	1	1	2247	3607	0.743428	1.0923	0.0589525	20.2388	0.512763	0.521948
AGBL1_DUP	0	2	2248	3606	0.730611	0			0.512763	0.527161
CLNK,ZNF518B_DUP	2	1	2246	3607	0.659098	4.75683	0.380301	59.4988	0.513402	0.532661
ABR_DUP	1	5	2247	3603	0.989321	0.195632	0.0124003	3.08639	0.516691	0.538313
ACOXL,ANAPC1,BCL2L11,BUB1,FBLN7,MERTK,TMEM87B,ZC3H6,ZC3H8_DUP	2	0	2246	3608	0.717071	inf			0.531427	0.543389
HTR5A,PAXIP1_DUP	1	1	2247	3607	0.811982	0.889163	0.0554149	14.2671	0.531427	0.548911
COL25A1,ETNPPL,OSTC,RPL34_DUP	1	1	2247	3607	0.811982	0.889163	0.0554149	14.2671	0.531427	0.553903
C4orf22_DUP	1	1	2247	3607	0.811982	0.889163	0.0554149	14.2671	0.531427	0.558785
PAMR1_DEL	3	1	2245	3607	0.205021	2.49757	0.345395	18.0601	0.542192	0.563551
IMMP2L_DEL	7	18	2241	3590	0.344371	0.707371	0.295253	1.69473	0.548095	0.568169
ERCC2,KLC3,PPP1R13L_DUP	1	2	2247	3606	0.781507	1.04324	0.0761122	14.2992	0.55206	0.571948
CYFIP1,NIPA1,NIPA2,TUBGCP5_DEL	8	10	2240	3598	0.987113	1.56901	0.557159	4.41847	0.583722	0.575775
CCT4,COMMD1,FAM161A_DUP	2	0	2246	3608	0.862356	inf			0.586348	0.579441
AHR_DUP	1	1	2247	3607	0.88192	0.690843	0.0264679	18.0318	0.586348	0.582627
SLC2A14,SLC2A3_DEL	2	0	2246	3608	0.862356	inf			0.586348	0.585622
MPHOSPH8_DUP	2	0	2246	3608	0.862356	inf			0.586348	0.588164
ZMYM2_DUP	2	0	2246	3608	0.862356	inf			0.586348	0.590327
ACER2,ADAMTSL1,DENND4C,FAM154A,HAUS6,PLIN2,RPS6,RRAGA,SLC24A2_DUP	1	4	2247	3604	0.592089	0.309606	0.0306836	3.124	0.592157	0.592596
FPR2_DUP	1	4	2247	3604	0.592089	0.309606	0.0306836	3.124	0.592157	0.594134
KDM4C_DUP	1	4	2247	3604	0.592089	0.309606	0.0306836	3.124	0.592157	0.595664
DNAJC15,EPSTI1_DUP	1	4	2247	3604	0.592089	0.309606	0.0306836	3.124	0.592157	0.59711
CYTL1,STK32B_DUP	2	1	2246	3607	0.737504	4.39606	0.328778	58.7793	0.596636	0.598575
MCTP2_DUP	2	1	2246	3607	0.737504	4.39606	0.328778	58.7793	0.596636	0.599875
ARHGEF10_DEL	2	1	2246	3607	0.737504	4.39606	0.328778	58.7793	0.596636	0.601075
ARHGAP10_DEL	2	1	2246	3607	0.737504	4.39606	0.328778	58.7793	0.596636	0.602209
TLR3_DUP	1	2	2247	3606	0.588536	0.906808	0.0946227	8.69032	0.596636	0.603366
CNTN4_DUP	2	1	2246	3607	0.737504	4.39606	0.328778	58.7793	0.596636	0.604264
IMMP2L_DUP	2	1	2246	3607	0.737504	4.39606	0.328778	58.7793	0.596636	0.60518
MUC4_DUP	2	1	2246	3607	0.737504	4.39606	0.328778	58.7793	0.596636	0.606148
ASAH2_DUP	1	2	2247	3606	0.588536	0.906808	0.0946227	8.69032	0.596636	0.606774
CXCL2,CXCL3,CXCL5,MTHFD2L,PF4,PPBP_DUP	1	3	2247	3605	0.761427	0.314848	0.0314819	3.14876	0.602253	0.607361
SP140L_DEL	0	2	2248	3606	0.722843	0			0.604925	0.607877
DZIP3,HHLA2,KIAA1524,MYH15,RETNLB,TRAT1_DUP	0	2	2248	3606	0.722843	0			0.604925	0.608316
KIF26A_DUP	1	0	2247	3608	0.518619	inf			0.609834	0.608655
CEP128,TSHR_DUP	1	0	2247	3608	0.518619	inf			0.609834	0.608906
SYNDIG1L,VRTN_DUP	0	1	2248	3607	0.925109	0			0.609834	0.609128
PACRG_DEL	0	1	2248	3607	0.925109	0			0.609834	0.609278
NDUFA4,PHF14,THSD7A_DEL	1	0	2247	3608	0.518619	inf			0.609834	0.609416
DGKB_DEL	0	1	2248	3607	0.925109	0			0.609834	0.609511
FTSJ2,MAD1L1,NUDT1,SNX8_DUP	1	0	2247	3608	0.518619	inf			0.609834	0.609587
NDUFA4,PHF14,THSD7A_DUP	0	1	2248	3607	0.925109	0			0.609834	0.609655
CARD11_DUP	0	1	2248	3607	0.925109	0			0.609834	0.609722
SDK1_DUP	0	1	2248	3607	0.925109	0			0.609834	0.609759
MPC1,PRR18,RPS6KA2,SFT2D1_DUP	0	1	2248	3607	0.925109	0			0.609834	0.60978
C7orf26,GRID2IP,ZDHHC4_DEL	0	1	2248	3607	0.925109	0			0.609834	0.609813
PACRG_DUP	0	1	2248	3607	0.925109	0			0.609834	0.609825
AIMP2,ANKRD61,CYTH3,EIF2AK1,USP42_DUP	0	1	2248	3607	0.925109	0			0.609834	0.609829
C14orf80,TMEM121_DUP	1	0	2247	3608	0.518619	inf			0.609834	0.60983
ATG2B_DUP	0	1	2248	3607	0.925109	0			0.609834	0.609834
RFPL4B_DUP	0	1	2248	3607	0.925109	0			0.609834	0.609834
TMEM242,ZDHHC14_DUP	1	0	2247	3608	0.518619	inf			0.609834	0.609834
BMP5,GFRAL,HCRTR2,HMGCLL1_DEL	0	1	2248	3607	0.925109	0			0.609834	0.609834
PKHD1_DUP	0	1	2248	3607	0.925109	0			0.609834	0.609834
HLA-DOA,HLA-DPA1,HLA-DPB1_DEL	1	0	2247	3608	0.518619	inf			0.609834	0.609834
FAM81A,MYO1E_DUP	0	1	2248	3607	0.925109	0			0.609834	0.609834
MEGF11_DUP	0	1	2248	3607	0.925109	0			0.609834	0.609834
CCDC33,CYP11A1_DEL	1	0	2247	3608	0.518619	inf			0.609834	0.609834
HIST1H2AG,HIST1H2AH,HIST1H2BJ,HIST1H2BK,HIST1H4I,POM121L2,PRSS16_DUP	0	1	2248	3607	0.925109	0			0.609834	0.609834
HDGFL1,PRL_DEL	0	1	2248	3607	0.925109	0			0.609834	0.609834
CDKAL1_DEL	0	1	2248	3607	0.925109	0			0.609834	0.609834
MCUR1_DEL	0	1	2248	3607	0.925109	0			0.609834	0.609834
C6orf52,PAK1IP1_DEL	1	0	2247	3608	0.518619	inf			0.609834	0.609834
CAGE1,RIOK1,RREB1,SSR1_DUP	0	1	2248	3607	0.925109	0			0.609834	0.609834
MNS1_DEL	1	0	2247	3608	0.518619	inf			0.609834	0.609834
ABHD2,FANCI,POLG,RLBP1_DEL	1	0	2247	3608	0.518619	inf			0.609834	0.609834
BTNL3,BTNL8,BTNL9,MGAT1,OR2V1,ZFP62_DUP	0	1	2248	3607	0.925109	0			0.609834	0.609834
SLCO3A1_DUP	1	0	2247	3608	0.518619	inf			0.609834	0.609834
CNOT6,FLT4,GFPT2,MAPK9,SCGB3A1_DUP	0	1	2248	3607	0.925109	0			0.609834	0.609834
FAM174B_DUP	1	0	2247	3608	0.518619	inf			0.609834	0.609834
EFCAB9,STK10,UBTD2_DUP	0	1	2248	3607	0.925109	0			0.609834	0.609834
FBXW11_DUP	1	0	2247	3608	0.518619	inf			0.609834	0.609834
KCNIP1_DUP	0	1	2248	3607	0.925109	0			0.609834	0.609834
LSM11,THG1L_DUP	0	1	2248	3607	0.925109	0			0.609834	0.609834
IRGM,SMIM3,ZNF300_DEL	0	1	2248	3607	0.925109	0			0.609834	0.609834
FSTL4_DEL	0	1	2248	3607	0.925109	0			0.609834	0.609834
SLC22A5_DUP	1	0	2247	3608	0.518619	inf			0.609834	0.609834
LMNB1,MARCH3_DUP	0	1	2248	3607	0.925109	0			0.609834	0.609834
EXOC2_DUP	0	1	2248	3607	0.925109	0			0.609834	0.609834
ACAT2,MRPL18,PNLDC1,TCP1,WTAP_DUP	0	1	2248	3607	0.925109	0			0.609834	0.609834
PRTG_DEL	0	1	2248	3607	0.925109	0			0.609834	0.609834
WDR72_DEL	1	0	2247	3608	0.518619	inf			0.609834	0.609834
CCDC170_DUP	0	1	2248	3607	0.925109	0			0.609834	0.609834
PLEKHG1_DUP	0	1	2248	3607	0.925109	0			0.609834	0.609834
RAET1L,ULBP3_DUP	1	0	2247	3608	0.518619	inf			0.609834	0.609834
NMBR_DEL	1	0	2247	3608	0.518619	inf			0.609834	0.609834
NMBR_DUP	0	1	2248	3607	0.925109	0			0.609834	0.609834
RYR3_DUP	0	1	2248	3607	0.925109	0			0.609834	0.609834
PATL2,SPG11_DEL	1	0	2247	3608	0.518619	inf			0.609834	0.609834
LAMA2_DUP	0	1	2248	3607	0.925109	0			0.609834	0.609834
PTPRK_DUP	0	1	2248	3607	0.925109	0			0.609834	0.609834
TRMT11_DUP	0	1	2248	3607	0.925109	0			0.609834	0.609834
B2M,TRIM69_DUP	0	1	2248	3607	0.925109	0			0.609834	0.609834
MCM9_DUP	0	1	2248	3607	0.925109	0			0.609834	0.609834
MEI4_DUP	0	1	2248	3607	0.925109	0			0.609834	0.609834
SLC12A1_DUP	1	0	2247	3608	0.518619	inf			0.609834	0.609834
RPF2_DUP	0	1	2248	3607	0.925109	0			0.609834	0.609834
DDO,METTL24,SLC22A16_DUP	0	1	2248	3607	0.925109	0			0.609834	0.609834
AP4E1,CYP19A1,TNFAIP8L3_DEL	0	1	2248	3607	0.925109	0			0.609834	0.609834
MMS22L_DEL	0	1	2248	3607	0.925109	0			0.609834	0.609834
FUT9,MANEA,UFL1_DEL	1	0	2247	3608	0.518619	inf			0.609834	0.609834
BCL2L10,LEO1,MAPK6_DUP	0	1	2248	3607	0.925109	0			0.609834	0.609834
MDN1_DEL	1	0	2247	3608	0.518619	inf			0.609834	0.609834
MYO5C_DEL	0	1	2248	3607	0.925109	0			0.609834	0.609834
RNGTT_DUP	0	1	2248	3607	0.925109	0			0.609834	0.609834
ORC3,RARS2,SLC35A1_DUP	0	1	2248	3607	0.925109	0			0.609834	0.609834
TBX18_DUP	0	1	2248	3607	0.925109	0			0.609834	0.609834
CYB5R4,RIPPLY2_DUP	0	1	2248	3607	0.925109	0			0.609834	0.609834
KIAA1919,SLC16A10_DEL	0	1	2248	3607	0.925109	0			0.609834	0.609834
HDAC9_DEL	1	0	2247	3608	0.518619	inf			0.609834	0.609834
KCND2_DUP	0	1	2248	3607	0.925109	0			0.609834	0.609834
PRKCH_DEL	0	1	2248	3607	0.925109	0			0.609834	0.609834
CARD16,CARD17,CARD18,CASP1,CASP12,CASP4,CASP5_DUP	1	0	2247	3608	0.518619	inf			0.609834	0.609834
CUL5,RAB39A_DUP	0	1	2248	3607	0.925109	0			0.609834	0.609834
ATM,C11orf65,NPAT_DUP	1	0	2247	3608	0.518619	inf			0.609834	0.609834
RDX_DUP	0	1	2248	3607	0.925109	0			0.609834	0.609834
PAPPA_DUP	0	1	2248	3607	0.925109	0			0.609834	0.609834
AKNA,COL27A1,ORM1,ORM2_DUP	1	0	2247	3608	0.518619	inf			0.609834	0.609834
FKBP15,SLC31A1,SLC31A2_DUP	0	1	2248	3607	0.925109	0			0.609834	0.609834
ZFP37_DUP	0	1	2248	3607	0.925109	0			0.609834	0.609834
CEP164,DSCAML1_DUP	1	0	2247	3608	0.518619	inf			0.609834	0.609834
CYLC2_DUP	0	1	2248	3607	0.925109	0			0.609834	0.609834
NAA35_DUP	0	1	2248	3607	0.925109	0			0.609834	0.609834
AGTPBP1_DUP	0	1	2248	3607	0.925109	0			0.609834	0.609834
CCDC67_DEL	0	1	2248	3607	0.925109	0			0.609834	0.609834
GNA14_DUP	0	1	2248	3607	0.925109	0			0.609834	0.609834
IFNA1,IFNE_DEL	1	0	2247	3608	0.518619	inf			0.609834	0.609834
CACNA2D4_DEL	0	1	2248	3607	0.925109	0			0.609834	0.609834
BNC2_DEL	1	0	2247	3608	0.518619	inf			0.609834	0.609834
LURAP1L_DEL	0	1	2248	3607	0.925109	0			0.609834	0.609834
TMEM261_DEL	1	0	2247	3608	0.518619	inf			0.609834	0.609834
ERMP1,KIAA1432_DEL	0	1	2248	3607	0.925109	0			0.609834	0.609834
GLIS3,SLC1A1_DEL	0	1	2248	3607	0.925109	0			0.609834	0.609834
KCNV2,KIAA0020,VLDLR_DUP	0	1	2248	3607	0.925109	0			0.609834	0.609834
DMRT2_DUP	0	1	2248	3607	0.925109	0			0.609834	0.609834
DERA_DEL	0	1	2248	3607	0.925109	0			0.609834	0.609834
C8orf31,EEF1D,GSDMD,LY6E,LY6H,MROH6,NAPRT1,PYCRL,TIGD5,TSTA3,ZC3H3,ZNF623_DUP	0	1	2248	3607	0.925109	0			0.609834	0.609834
PDE3A_DEL	0	1	2248	3607	0.925109	0			0.609834	0.609834
CDKN2A,CDKN2B_DUP	0	1	2248	3607	0.925109	0			0.609834	0.609834
MTNR1B,SLC36A4_DUP	1	0	2247	3608	0.518619	inf			0.609834	0.609834
MYO3A_DEL	0	1	2248	3607	0.925109	0			0.609834	0.609834
C11orf82,FAM181B,PRCP,RAB30_DEL	0	1	2248	3607	0.925109	0			0.609834	0.609834
GPR123_DUP	0	1	2248	3607	0.925109	0			0.609834	0.609834
LRRC27,PWWP2B_DUP	0	1	2248	3607	0.925109	0			0.609834	0.609834
NPS_DUP	0	1	2248	3607	0.925109	0			0.609834	0.609834
ADAM12_DUP	0	1	2248	3607	0.925109	0			0.609834	0.609834
BUB3,HMX2,HMX3_DUP	0	1	2248	3607	0.925109	0			0.609834	0.609834
BAG3_DUP	1	0	2247	3608	0.518619	inf			0.609834	0.609834
OR52A1,OR52A5_DUP	1	0	2247	3608	0.518619	inf			0.609834	0.609834
CCDC147_DEL	0	1	2248	3607	0.925109	0			0.609834	0.609834
OR10A5,OR2AG1,OR2AG2,OR6A2_DUP	0	1	2248	3607	0.925109	0			0.609834	0.609834
C10orf12,LCOR,SLIT1_DUP	1	0	2247	3608	0.518619	inf			0.609834	0.609834
OR5P2,OR5P3_DEL	0	1	2248	3607	0.925109	0			0.609834	0.609834
CYP2C19_DEL	1	0	2247	3608	0.518619	inf			0.609834	0.609834
MICALCL_DUP	1	0	2247	3608	0.518619	inf			0.609834	0.609834
CCDC179_DUP	1	0	2247	3608	0.518619	inf			0.609834	0.609834
LUZP2_DUP	1	0	2247	3608	0.518619	inf			0.609834	0.609834
NRG3_DUP	0	1	2248	3607	0.925109	0			0.609834	0.609834
ANO3,MUC15_DEL	0	1	2248	3607	0.925109	0			0.609834	0.609834
MICU1_DUP	0	1	2248	3607	0.925109	0			0.609834	0.609834
CSTF3,HIPK3_DUP	0	1	2248	3607	0.925109	0			0.609834	0.609834
MTRNR2L5_DUP	0	1	2248	3607	0.925109	0			0.609834	0.609834
PCDH15_DUP	0	1	2248	3607	0.925109	0			0.609834	0.609834
MBL2_DUP	0	1	2248	3607	0.925109	0			0.609834	0.609834
A1CF_DUP	1	0	2247	3608	0.518619	inf			0.609834	0.609834
OR4D10,OR4D6,OR5A1,OR5A2,OR5AN1_DUP	0	1	2248	3607	0.925109	0			0.609834	0.609834
MSMB,NCOA4,TIMM23_DUP	0	1	2248	3607	0.925109	0			0.609834	0.609834
CD6_DUP	0	1	2248	3607	0.925109	0			0.609834	0.609834
CXCL12_DEL	0	1	2248	3607	0.925109	0			0.609834	0.609834
HAS2,MTBP,SNTB1_DUP	0	1	2248	3607	0.925109	0			0.609834	0.609834
ACTN1_DEL	1	0	2247	3608	0.518619	inf			0.609834	0.609834
CSMD3_DEL	0	1	2248	3607	0.925109	0			0.609834	0.609834
ERGIC2,TMTC1_DEL	0	1	2248	3607	0.925109	0			0.609834	0.609834
BRCA2,N4BP2L1,N4BP2L2_DUP	0	1	2248	3607	0.925109	0			0.609834	0.609834
TAS2R41_DUP	1	0	2247	3608	0.518619	inf			0.609834	0.609834
SERTM1_DUP	0	1	2248	3607	0.925109	0			0.609834	0.609834
RAB19,SLC37A3_DEL	0	1	2248	3607	0.925109	0			0.609834	0.609834
RFXAP,SMAD9_DUP	1	0	2247	3608	0.518619	inf			0.609834	0.609834
GRM8_DEL	0	1	2248	3607	0.925109	0			0.609834	0.609834
UFM1_DUP	0	1	2248	3607	0.925109	0			0.609834	0.609834
COG5_DEL	1	0	2247	3608	0.518619	inf			0.609834	0.609834
CUX1_DUP	1	0	2247	3608	0.518619	inf			0.609834	0.609834
DYNC1I1,SLC25A13_DUP	0	1	2248	3607	0.925109	0			0.609834	0.609834
CDK14,FZD1_DUP	1	0	2247	3608	0.518619	inf			0.609834	0.609834
DCT,GPC6,GPR180,SOX21,TGDS_DUP	0	1	2248	3607	0.925109	0			0.609834	0.609834
B3GALTL,HSPH1_DUP	0	1	2248	3607	0.925109	0			0.609834	0.609834
C7orf62,C7orf63,CLDN12,GTPBP10,STEAP1,STEAP2,ZNF804B_DEL	0	1	2248	3607	0.925109	0			0.609834	0.609834
DCT,GPC6,GPR180,SOX21,TGDS_DEL	1	0	2247	3608	0.518619	inf			0.609834	0.609834
ABCC4_DEL	1	0	2247	3608	0.518619	inf			0.609834	0.609834
CLDN10,DNAJC3,DZIP1,HS6ST3,UGGT2_DEL	1	0	2247	3608	0.518619	inf			0.609834	0.609834
SPACA7_DUP	1	0	2247	3608	0.518619	inf			0.609834	0.609834
OXA1L,SLC7A7_DUP	1	0	2247	3608	0.518619	inf			0.609834	0.609834
WBSCR17_DUP	0	1	2248	3607	0.925109	0			0.609834	0.609834
FAM177A1,KIAA0391,PPP2R3C_DUP	0	1	2248	3607	0.925109	0			0.609834	0.609834
C7orf69,PKD1L1_DUP	0	1	2248	3607	0.925109	0			0.609834	0.609834
GPR141_DUP	0	1	2248	3607	0.925109	0			0.609834	0.609834
BBS9,NT5C3A,RP9_DUP	0	1	2248	3607	0.925109	0			0.609834	0.609834
EVX1,HOXA13_DUP	0	1	2248	3607	0.925109	0			0.609834	0.609834
NPY_DUP	0	1	2248	3607	0.925109	0			0.609834	0.609834
C7orf62,C7orf63,CLDN12,GTPBP10,STEAP1,STEAP2,ZNF804B_DUP	1	0	2247	3608	0.518619	inf			0.609834	0.609834
MTUS2_DEL	1	0	2247	3608	0.518619	inf			0.609834	0.609834
GALNT11_DUP	0	1	2248	3607	0.925109	0			0.609834	0.609834
C1QTNF9,C1QTNF9B,MIPEP,SACS,SGCG,SPATA13,TNFRSF19_DEL	0	1	2248	3607	0.925109	0			0.609834	0.609834
SBSPON,TERF1_DUP	0	1	2248	3607	0.925109	0			0.609834	0.609834
FAM186A,LIMA1_DUP	1	0	2247	3608	0.518619	inf			0.609834	0.609834
RPS20_DEL	1	0	2247	3608	0.518619	inf			0.609834	0.609834
LYN,TGS1_DEL	1	0	2247	3608	0.518619	inf			0.609834	0.609834
TMEM68,XKR4_DEL	1	0	2247	3608	0.518619	inf			0.609834	0.609834
DCD,LACRT,NCKAP1L,PDE1B,PPP1R1A_DUP	0	1	2248	3607	0.925109	0			0.609834	0.609834
FAM150A,RB1CC1_DUP	0	1	2248	3607	0.925109	0			0.609834	0.609834
ST18_DEL	1	0	2247	3608	0.518619	inf			0.609834	0.609834
AP3M2,KAT6A,PLAT_DUP	0	1	2248	3607	0.925109	0			0.609834	0.609834
INTS9_DUP	0	1	2248	3607	0.925109	0			0.609834	0.609834
LGR5_DUP	1	0	2247	3608	0.518619	inf			0.609834	0.609834
TRHDE_DUP	0	1	2248	3607	0.925109	0			0.609834	0.609834
BBS10,OSBPL8_DUP	0	1	2248	3607	0.925109	0			0.609834	0.609834
MTUS1_DEL	1	0	2247	3608	0.518619	inf			0.609834	0.609834
DCN,LUM_DEL	0	1	2248	3607	0.925109	0			0.609834	0.609834
BLK_DUP	0	1	2248	3607	0.925109	0			0.609834	0.609834
DCN,LUM_DUP	0	1	2248	3607	0.925109	0			0.609834	0.609834
KSR2,PEBP1,RFC5,SUDS3,TAOK3,VSIG10_DUP	0	1	2248	3607	0.925109	0			0.609834	0.609834
C2CD2_DEL	1	0	2247	3608	0.518619	inf			0.609834	0.609834
ATP6V0A2,TCTN2_DEL	1	0	2247	3608	0.518619	inf			0.609834	0.609834
PRSS55_DEL	0	1	2248	3607	0.925109	0			0.609834	0.609834
DHX37,SCARB1,UBC_DUP	0	1	2248	3607	0.925109	0			0.609834	0.609834
DEFA6_DEL	0	1	2248	3607	0.925109	0			0.609834	0.609834
ANGPT2,MCPH1_DEL	0	1	2248	3607	0.925109	0			0.609834	0.609834
MMP17,ULK1_DUP	1	0	2247	3608	0.518619	inf			0.609834	0.609834
CSMD1_DEL	1	0	2247	3608	0.518619	inf			0.609834	0.609834
PTPRN2_DUP	1	0	2247	3608	0.518619	inf			0.609834	0.609834
BCAT1,C12orf77_DUP	0	1	2248	3607	0.925109	0			0.609834	0.609834
LRRC28,TTC23_DUP	0	1	2248	3607	0.925109	0			0.609834	0.609834
GLYR1,PPL,UBN1_DEL	1	0	2247	3608	0.518619	inf			0.609834	0.609834
ADAMTS17_DEL	0	1	2248	3607	0.925109	0			0.609834	0.609834
PAK7_DUP	0	1	2248	3607	0.925109	0			0.609834	0.609834
AGPS,TTC30B_DUP	0	1	2248	3607	0.925109	0			0.609834	0.609834
SCN7A_DUP	1	0	2247	3608	0.518619	inf			0.609834	0.609834
MACROD2_DEL	0	1	2248	3607	0.925109	0			0.609834	0.609834
RBL1,RPN2_DUP	1	0	2247	3608	0.518619	inf			0.609834	0.609834
DPP4,FAP,GCA,GCG,IFIH1,KCNH7_DUP	1	0	2247	3608	0.518619	inf			0.609834	0.609834
GTSF1L,IFT52,L3MBTL1,MYBL2,SGK2_DUP	0	1	2248	3607	0.925109	0			0.609834	0.609834
NCKAP5_DUP	1	0	2247	3608	0.518619	inf			0.609834	0.609834
PTGIS_DEL	0	1	2248	3607	0.925109	0			0.609834	0.609834
GPR39_DUP	0	1	2248	3607	0.925109	0			0.609834	0.609834
PTPRS,ZNRF4_DUP	0	1	2248	3607	0.925109	0			0.609834	0.609834
CCL25,FBN3_DUP	1	0	2247	3608	0.518619	inf			0.609834	0.609834
CCL25,FBN3_DEL	0	1	2248	3607	0.925109	0			0.609834	0.609834
FSIP2_DUP	1	0	2247	3608	0.518619	inf			0.609834	0.609834
ANGPTL4,KANK3,RAB11B_DEL	1	0	2247	3608	0.518619	inf			0.609834	0.609834
MUC16_DUP	0	1	2248	3607	0.925109	0			0.609834	0.609834
MAP4K4_DEL	1	0	2247	3608	0.518619	inf			0.609834	0.609834
PDCL3_DUP	1	0	2247	3608	0.518619	inf			0.609834	0.609834
ADRA2B,ANKRD23,ANKRD36,ANKRD39,ARID5A,ASTL,CIAO1,CNNM3,CNNM4,DUSP2,FAHD2B,FAM178B,ITPRIPL1,KANSL3,LMAN2L,NCAPH,SEMA4C,SNRNP200,STARD7,TMEM127_DEL	1	0	2247	3608	0.518619	inf			0.609834	0.609834
B3GNT3,FCHO1,INSL3,JAK3_DEL	0	1	2248	3607	0.925109	0			0.609834	0.609834
EIF2AK3,FABP1,KRCC1,RPIA,SMYD1,TEX37,THNSL2_DUP	1	0	2247	3608	0.518619	inf			0.609834	0.609834
IMMT,MRPL35,PTCD3,REEP1_DUP	0	1	2248	3607	0.925109	0			0.609834	0.609834
LRRTM4_DEL	1	0	2247	3608	0.518619	inf			0.609834	0.609834
ALMS1_DEL	0	1	2248	3607	0.925109	0			0.609834	0.609834
UGP2,VPS54_DEL	1	0	2247	3608	0.518619	inf			0.609834	0.609834
KIAA1841,PEX13,PUS10,REL_DEL	0	1	2248	3607	0.925109	0			0.609834	0.609834
ZNF486,ZNF682,ZNF90_DUP	0	1	2248	3607	0.925109	0			0.609834	0.609834
CCDC88A,CLHC1,MTIF2,RPS27A_DUP	1	0	2247	3608	0.518619	inf			0.609834	0.609834
RGPD3,ST6GAL2_DUP	0	1	2248	3607	0.925109	0			0.609834	0.609834
EML6_DEL	0	1	2248	3607	0.925109	0			0.609834	0.609834
AP5S1,C20orf27,CDC25B,CENPB,MAVS,RASSF2,SLC23A2,SPEF1_DUP	1	0	2247	3608	0.518619	inf			0.609834	0.609834
PARD3B_DUP	0	1	2248	3607	0.925109	0			0.609834	0.609834
ARPP21_DEL	0	1	2248	3607	0.925109	0			0.609834	0.609834
METTL4,NDC80,SMCHD1_DUP	0	1	2248	3607	0.925109	0			0.609834	0.609834
DLGAP1_DEL	1	0	2247	3608	0.518619	inf			0.609834	0.609834
COLQ_DEL	0	1	2248	3607	0.925109	0			0.609834	0.609834
FBLN2,HDAC11,NUP210_DUP	1	0	2247	3608	0.518619	inf			0.609834	0.609834
PPARG,TIMP4_DUP	1	0	2247	3608	0.518619	inf			0.609834	0.609834
GRM7_DUP	0	1	2248	3607	0.925109	0			0.609834	0.609834
LRRN1_DUP	0	1	2248	3607	0.925109	0			0.609834	0.609834
ITPR1,SETMAR,SUMF1_DEL	1	0	2247	3608	0.518619	inf			0.609834	0.609834
ITPR1,SETMAR,SUMF1_DUP	0	1	2248	3607	0.925109	0			0.609834	0.609834
CRBN,IL5RA,TRNT1_DUP	0	1	2248	3607	0.925109	0			0.609834	0.609834
CRBN,IL5RA,TRNT1_DEL	0	1	2248	3607	0.925109	0			0.609834	0.609834
RAB12_DUP	0	1	2248	3607	0.925109	0			0.609834	0.609834
C18orf63,CBLN2,CCDC102B,CD226,CNDP1,CNDP2,CYB5A,DOK6,DSEL,FAM69C,FBXO15,GTSCR1,NETO1,RTTN,SMIM21,SOCS6,TIMM21,TMX3,TSHZ1,ZADH2,ZNF407_DUP	1	0	2247	3608	0.518619	inf			0.609834	0.609834
PRR16_DEL	0	1	2248	3607	0.925109	0			0.609834	0.609834
MTERFD2,PASK,PPP1R7_DEL	1	0	2247	3608	0.518619	inf			0.609834	0.609834
AQP12B,GPR35_DUP	1	0	2247	3608	0.518619	inf			0.609834	0.609834
SPP2_DUP	0	1	2248	3607	0.925109	0			0.609834	0.609834
FAM210A,LDLRAD4,RNMT_DUP	1	0	2247	3608	0.518619	inf			0.609834	0.609834
ITM2C_DEL	0	1	2248	3607	0.925109	0			0.609834	0.609834
PIAS2_DEL	1	0	2247	3608	0.518619	inf			0.609834	0.609834
MARCH4_DUP	1	0	2247	3608	0.518619	inf			0.609834	0.609834
CTIF_DUP	0	1	2248	3607	0.925109	0			0.609834	0.609834
MREG,PECR,TMEM169_DUP	0	1	2248	3607	0.925109	0			0.609834	0.609834
FN1_DEL	0	1	2248	3607	0.925109	0			0.609834	0.609834
CTIF_DEL	0	1	2248	3607	0.925109	0			0.609834	0.609834
CDH7_DEL	0	1	2248	3607	0.925109	0			0.609834	0.609834
ERBB4_DUP	1	0	2247	3608	0.518619	inf			0.609834	0.609834
CHMP1B,GNAL,MPPE1_DUP	0	1	2248	3607	0.925109	0			0.609834	0.609834
STAC_DEL	0	1	2248	3607	0.925109	0			0.609834	0.609834
ZNF737_DUP	1	0	2247	3608	0.518619	inf			0.609834	0.609834
LRP3,SLC7A10,WDR88_DUP	0	1	2248	3607	0.925109	0			0.609834	0.609834
CABP7,NEFH,NF2,NIPSNAP1,THOC5,UQCR10,ZMAT5_DUP	0	1	2248	3607	0.925109	0			0.609834	0.609834
KIAA1324,SARS_DEL	1	0	2247	3608	0.518619	inf			0.609834	0.609834
LPPR4_DUP	0	1	2248	3607	0.925109	0			0.609834	0.609834
DPYD_DEL	0	1	2248	3607	0.925109	0			0.609834	0.609834
LARGE_DEL	0	1	2248	3607	0.925109	0			0.609834	0.609834
CLCA1_DUP	0	1	2248	3607	0.925109	0			0.609834	0.609834
TTLL7_DUP	0	1	2248	3607	0.925109	0			0.609834	0.609834
LARGE_DUP	0	1	2248	3607	0.925109	0			0.609834	0.609834
PIGK,ST6GALNAC5_DUP	0	1	2248	3607	0.925109	0			0.609834	0.609834
GRAP2_DUP	0	1	2248	3607	0.925109	0			0.609834	0.609834
NEGR1_DEL	0	1	2248	3607	0.925109	0			0.609834	0.609834
TBC1D22A_DEL	0	1	2248	3607	0.925109	0			0.609834	0.609834
PDE4B_DEL	0	1	2248	3607	0.925109	0			0.609834	0.609834
EMID1,KREMEN1_DUP	0	1	2248	3607	0.925109	0			0.609834	0.609834
DNAJC6,LEPROT_DUP	0	1	2248	3607	0.925109	0			0.609834	0.609834
HSPA13,LIPI,POTED,RBM11,SAMSN1_DUP	0	1	2248	3607	0.925109	0			0.609834	0.609834
FAAH,NSUN4_DUP	0	1	2248	3607	0.925109	0			0.609834	0.609834
ATP5J,GABPA,JAM2_DUP	1	0	2247	3608	0.518619	inf			0.609834	0.609834
ADAMTS1,CYYR1_DUP	1	0	2247	3608	0.518619	inf			0.609834	0.609834
LAPTM5,MATN1_DUP	1	0	2247	3608	0.518619	inf			0.609834	0.609834
RHCE,TMEM57_DUP	0	1	2248	3607	0.925109	0			0.609834	0.609834
KRTAP21-1,KRTAP21-2,KRTAP21-3,KRTAP8-1_DUP	1	0	2247	3608	0.518619	inf			0.609834	0.609834
C21orf140,KCNE1,KCNE2,RCAN1,SMIM11_DUP	0	1	2248	3607	0.925109	0			0.609834	0.609834
PRDM15_DEL	1	0	2247	3608	0.518619	inf			0.609834	0.609834
CAMTA1,PER3,UTS2,VAMP3_DEL	0	1	2248	3607	0.925109	0			0.609834	0.609834
NOL9,PLEKHG5,TAS1R1_DUP	1	0	2247	3608	0.518619	inf			0.609834	0.609834
AJAP1_DUP	0	1	2248	3607	0.925109	0			0.609834	0.609834
GABRD,PRKCZ_DUP	0	1	2248	3607	0.925109	0			0.609834	0.609834
FAM19A5_DEL	0	1	2248	3607	0.925109	0			0.609834	0.609834
ZNF728,ZNF730,ZNF91_DUP	0	1	2248	3607	0.925109	0			0.609834	0.609834
C1orf137,CD101,CD2,CD58,FAM46C,IGSF3,MAN1A2,PTGFRN,TRIM45,TTF2,VTCN1_DUP	1	0	2247	3608	0.518619	inf			0.609834	0.609834
ADAM30,HMGCS2,PHGDH,REG4,ZNF697_DUP	0	1	2248	3607	0.925109	0			0.609834	0.609834
GTF2A1L,LHCGR,STON1-GTF2A1L_DUP	1	0	2247	3608	0.518619	inf			0.609834	0.609834
CAPNS1,COX7A1,POLR2I,TBCB,THAP8,WDR62,ZNF565_DEL	1	0	2247	3608	0.518619	inf			0.609834	0.609834
CYP2B6_DEL	0	1	2248	3607	0.925109	0			0.609834	0.609834
EPCAM,MSH2_DEL	1	0	2247	3608	0.518619	inf			0.609834	0.609834
PSG9_DEL	0	1	2248	3607	0.925109	0			0.609834	0.609834
ETHE1,LYPD3,PHLDB3,TEX101,XRCC1,ZNF575_DUP	0	1	2248	3607	0.925109	0			0.609834	0.609834
SIGLECL1_DUP	0	1	2248	3607	0.925109	0			0.609834	0.609834
ATL2_DEL	1	0	2247	3608	0.518619	inf			0.609834	0.609834
VIT_DEL	1	0	2247	3608	0.518619	inf			0.609834	0.609834
VIT_DUP	1	0	2247	3608	0.518619	inf			0.609834	0.609834
BIRC6,LTBP1,TTC27_DUP	1	0	2247	3608	0.518619	inf			0.609834	0.609834
DDX1_DUP	0	1	2248	3607	0.925109	0			0.609834	0.609834
NBAS_DEL	0	1	2248	3607	0.925109	0			0.609834	0.609834
HAO2,HSD3B2_DUP	0	1	2248	3607	0.925109	0			0.609834	0.609834
LAIR2_DUP	0	1	2248	3607	0.925109	0			0.609834	0.609834
LILRB4_DUP	1	0	2247	3608	0.518619	inf			0.609834	0.609834
EPS8L1,GP6,NLRP2,PPP1R12C,RDH13_DEL	0	1	2248	3607	0.925109	0			0.609834	0.609834
SMYD3,TFB2M_DUP	0	1	2248	3607	0.925109	0			0.609834	0.609834
FMN2_DEL	1	0	2247	3608	0.518619	inf			0.609834	0.609834
WNT3A_DUP	0	1	2248	3607	0.925109	0			0.609834	0.609834
SRP9_DUP	0	1	2248	3607	0.925109	0			0.609834	0.609834
ADIPOR1,CYB5R1,TMEM183A_DEL	0	1	2248	3607	0.925109	0			0.609834	0.609834
RASAL2,SEC16B_DUP	1	0	2247	3608	0.518619	inf			0.609834	0.609834
CD247,POU2F1_DEL	0	1	2248	3607	0.925109	0			0.609834	0.609834
ATP1A2,ATP1A4,IGSF8,KCNJ10,KCNJ9,PIGM_DUP	0	1	2248	3607	0.925109	0			0.609834	0.609834
KIRREL_DUP	1	0	2247	3608	0.518619	inf			0.609834	0.609834
GPR89A,PDZK1_DUP	0	1	2248	3607	0.925109	0			0.609834	0.609834
SGSM1_DUP	1	0	2247	3608	0.518619	inf			0.609834	0.609834
LILRA1,LILRA2,LILRB1_DEL	0	1	2248	3607	0.925109	0			0.609834	0.609834
ST6GALNAC1_DUP	0	1	2248	3607	0.925109	0			0.609834	0.609834
RAB31_DUP	0	1	2248	3607	0.925109	0			0.609834	0.609834
CACNA2D3_DUP	0	1	2248	3607	0.925109	0			0.609834	0.609834
ADAT1,KARS,TERF2IP_DUP	0	1	2248	3607	0.925109	0			0.609834	0.609834
ADAMTS18,MON1B,NUDT7,SYCE1L,VAT1L_DUP	0	1	2248	3607	0.925109	0			0.609834	0.609834
DDX60,DDX60L_DEL	0	1	2248	3607	0.925109	0			0.609834	0.609834
BCMO1_DUP	0	1	2248	3607	0.925109	0			0.609834	0.609834
MAB21L2_DEL	0	1	2248	3607	0.925109	0			0.609834	0.609834
LRBA_DEL	0	1	2248	3607	0.925109	0			0.609834	0.609834
HHIP_DEL	0	1	2248	3607	0.925109	0			0.609834	0.609834
MPHOSPH6_DUP	1	0	2247	3608	0.518619	inf			0.609834	0.609834
NDST4,UGT8_DUP	0	1	2248	3607	0.925109	0			0.609834	0.609834
GSTCD,NPNT_DUP	0	1	2248	3607	0.925109	0			0.609834	0.609834
GRID2_DUP	1	0	2247	3608	0.518619	inf			0.609834	0.609834
CDH13_DUP	1	0	2247	3608	0.518619	inf			0.609834	0.609834
MMRN1,SNCA_DEL	1	0	2247	3608	0.518619	inf			0.609834	0.609834
NEIL3_DUP	1	0	2247	3608	0.518619	inf			0.609834	0.609834
MMRN1,SNCA_DUP	0	1	2248	3607	0.925109	0			0.609834	0.609834
BANP,CA5A,JPH3,KLHDC4,SLC7A5_DUP	0	1	2248	3607	0.925109	0			0.609834	0.609834
C4orf36,SLC10A6_DUP	1	0	2247	3608	0.518619	inf			0.609834	0.609834
C4orf22_DEL	0	1	2248	3607	0.925109	0			0.609834	0.609834
FGF5,PRDM8_DEL	0	1	2248	3607	0.925109	0			0.609834	0.609834
ACSF3,CDH15_DUP	0	1	2248	3607	0.925109	0			0.609834	0.609834
SHROOM3_DEL	1	0	2247	3608	0.518619	inf			0.609834	0.609834
CACNA1D_DUP	0	1	2248	3607	0.925109	0			0.609834	0.609834
CDK10,CHMP1A,DPEP1,FANCA,SPATA2L,SPATA33,VPS9D1,ZNF276_DUP	0	1	2248	3607	0.925109	0			0.609834	0.609834
SGSM2,SMG6,SRR,TSR1_DUP	0	1	2248	3607	0.925109	0			0.609834	0.609834
GABRA4_DUP	0	1	2248	3607	0.925109	0			0.609834	0.609834
NSUN7_DUP	0	1	2248	3607	0.925109	0			0.609834	0.609834
PAFAH1B1_DUP	0	1	2248	3607	0.925109	0			0.609834	0.609834
RAP1GAP2_DUP	0	1	2248	3607	0.925109	0			0.609834	0.609834
HSD17B11,HSD17B13_DEL	1	0	2247	3608	0.518619	inf			0.609834	0.609834
FGFBP1,FGFBP2_DUP	0	1	2248	3607	0.925109	0			0.609834	0.609834
GLG1,MLKL,RFWD3_DEL	0	1	2248	3607	0.925109	0			0.609834	0.609834
ATP2A1,ATXN2L,CD19,LAT,NFATC2IP,RABEP2,SH2B1,SPNS1,TUFM_DUP	0	1	2248	3607	0.925109	0			0.609834	0.609834
TMEM232_DEL	1	0	2247	3608	0.518619	inf			0.609834	0.609834
CLCN7,IFT140,PTX4,TELO2,TMEM204_DUP	0	1	2248	3607	0.925109	0			0.609834	0.609834
RIOK2_DEL	1	0	2247	3608	0.518619	inf			0.609834	0.609834
CAST,ERAP1_DUP	0	1	2248	3607	0.925109	0			0.609834	0.609834
GPR98,LYSMD3,POLR3G_DEL	1	0	2247	3608	0.518619	inf			0.609834	0.609834
COX7C_DUP	1	0	2247	3608	0.518619	inf			0.609834	0.609834
CCDC64B,CLDN6,CLDN9,FLYWCH1,FLYWCH2,HCFC1R1,IL32,KREMEN2,MEFV,MMP25,OR1F1,PAQR4,PKMYT1,THOC6,TNFRSF12A,ZNF200,ZNF205,ZNF213,ZSCAN10_DUP	0	1	2248	3607	0.925109	0			0.609834	0.609834
CCDC64B,CLDN6,CLDN9,FLYWCH1,FLYWCH2,HCFC1R1,IL32,KREMEN2,MEFV,MMP25,OR1F1,PAQR4,PKMYT1,THOC6,TNFRSF12A,ZNF200,ZNF205,ZNF213,ZSCAN10_DEL	0	1	2248	3607	0.925109	0			0.609834	0.609834
ADCY9_DUP	0	1	2248	3607	0.925109	0			0.609834	0.609834
FAM159B,RGS7BP,SREK1IP1_DUP	0	1	2248	3607	0.925109	0			0.609834	0.609834
ANKS3,C16orf96,MGRN1,NUDT16L1,UBALD1_DEL	0	1	2248	3607	0.925109	0			0.609834	0.609834
ART1,CHRNA10,NUP98,PGAP2_DUP	1	0	2247	3608	0.518619	inf			0.609834	0.609834
ANKRD55_DUP	0	1	2248	3607	0.925109	0			0.609834	0.609834
AARS,CLEC18A,CLEC18C,COG4,DDX19A,DDX19B,EXOSC6,FUK,NOB1,NQO1,PDPR,SF3B3,ST3GAL2,WWP2_DUP	1	0	2247	3608	0.518619	inf			0.609834	0.609834
CCNO,CDC20B,DHX29,GPX8,MCIDAS,PPAP2A,SKIV2L2_DUP	0	1	2248	3607	0.925109	0			0.609834	0.609834
GDNF,WDR70_DUP	1	0	2247	3608	0.518619	inf			0.609834	0.609834
ABAT,CARHSP1,PMM2,TMEM186,USP7_DUP	1	0	2247	3608	0.518619	inf			0.609834	0.609834
ADAMTS12,AMACR,C1QTNF3,RXFP3,SLC45A2,TARS_DUP	1	0	2247	3608	0.518619	inf			0.609834	0.609834
C5orf22,CDH6,DROSHA,GOLPH3,MTMR12,PDZD2_DUP	0	1	2248	3607	0.925109	0			0.609834	0.609834
CDH18_DUP	0	1	2248	3607	0.925109	0			0.609834	0.609834
ARL6IP1,NOMO2,NPIPA8,RPS15A,SMG1_DUP	0	1	2248	3607	0.925109	0			0.609834	0.609834
C16orf52,CDR2,EEF2K,PDZD9,POLR3E,UQCRC2,VWA3A_DEL	0	1	2248	3607	0.925109	0			0.609834	0.609834
FASTKD3,MTRR_DUP	1	0	2247	3608	0.518619	inf			0.609834	0.609834
ADCY2_DUP	1	0	2247	3608	0.518619	inf			0.609834	0.609834
KIAA0947_DUP	0	1	2248	3607	0.925109	0			0.609834	0.609834
ADAMTS16_DEL	0	1	2248	3607	0.925109	0			0.609834	0.609834
SLC6A19_DUP	1	0	2247	3608	0.518619	inf			0.609834	0.609834
SLC12A7_DUP	1	0	2247	3608	0.518619	inf			0.609834	0.609834
METTL22_DEL	1	0	2247	3608	0.518619	inf			0.609834	0.609834
OR1E1,OR1E2,OR3A3,SPATA22_DEL	1	0	2247	3608	0.518619	inf			0.609834	0.609834
C4orf26,CDKL2,RCHY1,THAP6_DUP	0	1	2248	3607	0.925109	0			0.609834	0.609834
ADRA2C_DUP	0	1	2248	3607	0.925109	0			0.609834	0.609834
MAGEF1_DEL	1	0	2247	3608	0.518619	inf			0.609834	0.609834
ADORA2B,CENPV,FAM211A,NCOR1,PIGL,TRPV2,TTC19,UBB,ZNF287,ZSWIM7_DUP	1	0	2247	3608	0.518619	inf			0.609834	0.609834
GHSR_DUP	0	1	2248	3607	0.925109	0			0.609834	0.609834
TNIK_DUP	0	1	2248	3607	0.925109	0			0.609834	0.609834
NMD3,OTOL1,SPTSSB_DUP	0	1	2248	3607	0.925109	0			0.609834	0.609834
IQCJ-SCHIP1,SCHIP1_DUP	0	1	2248	3607	0.925109	0			0.609834	0.609834
ATP2A3,ZZEF1_DUP	1	0	2247	3608	0.518619	inf			0.609834	0.609834
C17orf51,CCDC144NL,DHRS7B,KCNJ12,MAP2K3,MTRNR2L1,TMEM11,USP22_DEL	1	0	2247	3608	0.518619	inf			0.609834	0.609834
ADAP2,ATAD5,CRLF3,RNF135,TEFM_DEL	0	1	2248	3607	0.925109	0			0.609834	0.609834
P2RY1_DUP	0	1	2248	3607	0.925109	0			0.609834	0.609834
SLC35G3,UNC45B_DEL	0	1	2248	3607	0.925109	0			0.609834	0.609834
A4GNT,ARMC8,CEP70,CLDN18,DBR1,DZIP1L,ESYT3,FAIM,MRAS,NME9,PIK3CB_DUP	1	0	2247	3608	0.518619	inf			0.609834	0.609834
CDRT15,COX10,HS3ST3B1,PMP22,TEKT3,TVP23C,TVP23C-CDRT4_DUP	0	1	2248	3607	0.925109	0			0.609834	0.609834
PCCB,STAG1_DUP	1	0	2247	3608	0.518619	inf			0.609834	0.609857
CCDC37,CHST13,UROC1,ZXDC_DUP	0	1	2248	3607	0.925109	0			0.609834	0.60988
GTF2E1,HGD,RABL3_DEL	1	0	2247	3608	0.518619	inf			0.609834	0.609934
IGSF11,LSAMP_DUP	0	1	2248	3607	0.925109	0			0.609834	0.610012
CD96,DPPA2,DPPA4,PLCXD2_DUP	0	1	2248	3607	0.925109	0			0.609834	0.610102
ZPLD1_DEL	1	0	2247	3608	0.518619	inf			0.609834	0.610275
CEP97,NFKBIZ,NXPE3,RPL24,ZBTB11_DUP	1	0	2247	3608	0.518619	inf			0.609834	0.610482
CMSS1_DEL	0	1	2248	3607	0.925109	0			0.609834	0.610853
OR5H2,OR5K3,OR5K4_DEL	0	1	2248	3607	0.925109	0			0.609834	0.611264
ACSF2,CACNA1G,CHAD,EPN3,MYCBPAP,RSAD1,SPATA20_DUP	0	1	2248	3607	0.925109	0			0.609834	0.611948
TOB1,WFIKKN2_DUP	1	0	2247	3608	0.518619	inf			0.609834	0.612785
SLC39A11_DEL	0	1	2248	3607	0.925109	0			0.609834	0.613666
FADS6,HID1,OTOP2,OTOP3,USH1G_DEL	0	1	2248	3607	0.925109	0			0.609834	0.614707
TF_DEL	0	1	2248	3607	0.925109	0			0.609834	0.61612
KNG1_DUP	1	0	2247	3608	0.518619	inf			0.609834	0.617621
ALDH3A2,SLC47A1,SLC47A2_DEL	0	1	2248	3607	0.925109	0			0.609834	0.619294
OR52A1,OR52A5_DEL	0	1	2248	3607	0.925109	0			0.609834	0.621233
DLG1,MFI2_DUP	1	0	2247	3608	0.518619	inf			0.609834	0.623426
XXYLT1_DUP	0	1	2248	3607	0.925109	0			0.609834	0.625578
CTBP1,MAEA_DUP	1	0	2247	3608	0.518619	inf			0.609834	0.62793
GAS7,MYH1,MYH13,MYH4,MYH8_DUP	0	1	2248	3607	0.925109	0			0.609834	0.630361
FGF12_DUP	1	0	2247	3608	0.518619	inf			0.609834	0.632867
ALOX15,GGT6,SMTNL2_DUP	1	0	2247	3608	0.518619	inf			0.609834	0.635451
ADIPOQ,EIF4A2,RFC4_DUP	1	0	2247	3608	0.518619	inf			0.609834	0.637796
CHSY1,SNRPA1,VIMP_DUP	3	1	2245	3607	0.919774	4.54377	0.282191	73.1627	0.623896	0.640242
ADAMTS2_DUP	3	3	2245	3605	0.613877	2.28113	0.414868	12.5427	0.628941	0.642062
KCNMB3_DUP	2	7	2246	3601	0.948194	0.472913	0.0830334	2.69346	0.637136	0.643727
ALPP,ALPPL2_DEL	4	5	2244	3603	0.938021	1.82075	0.453426	7.31133	0.645529	0.6452
MAP3K4_DUP	1	3	2247	3605	0.909017	0.88878	0.0923448	8.55413	0.645901	0.64646
POLE4_DUP	2	2	2246	3606	0.672507	2.66995	0.3756	18.9793	0.645901	0.64754
CD9,VWF_DUP	1	3	2247	3605	0.909017	0.88878	0.0923448	8.55413	0.645901	0.64845
MADCAM1,TPGS1_DUP	1	3	2247	3605	0.909017	0.88878	0.0923448	8.55413	0.645901	0.649097
EMR1,MBD3L2,MBD3L3,MBD3L4,MBD3L5_DUP	15	21	2233	3587	0.075095	1.23957	0.626573	2.4523	0.651004	0.649768
SLFN11,SLFN12_DEL	0	2	2248	3606	0.863719	0			0.651676	0.65021
DERL2,MIS12,NLRP1_DUP	0	2	2248	3606	0.863719	0			0.651676	0.650649
BTN2A2,BTN3A2_DUP	0	2	2248	3606	0.863719	0			0.651676	0.651026
GABRG1_DUP	1	1	2247	3607	0.875595	1.72605	0.0672285	44.3153	0.651676	0.651418
ACOT11,FAM151A,MROH7,PARS2,TTC4_DUP	0	2	2248	3606	0.863719	0			0.651676	0.651694
SLC2A14,SLC2A3_DUP	1	1	2247	3607	0.875595	1.72605	0.0672285	44.3153	0.651676	0.651913
GRID2_DEL	1	1	2247	3607	0.376184	1.37413	0.116832	16.1621	0.651676	0.652205
ASTN2,TRIM32_DEL	1	1	2247	3607	0.875595	1.72605	0.0672285	44.3153	0.651676	0.652538
ICA1_DUP	1	1	2247	3607	0.376184	1.37413	0.116832	16.1621	0.651676	0.652816
AATF,ACACA,C17orf78,DDX52,DHRS11,DUSP14,GGNBP2,HNF1B,LHX1,MRM1,MYO19,PIGW,SYNRG,TADA2A,ZNHIT3_DUP	0	2	2248	3606	0.863719	0			0.651676	0.653104
ACP6,BCL9,CHD1L,FMO5,GJA5,GJA8,GPR89B,NBPF24,PRKAB2_DEL	1	1	2247	3607	0.875595	1.72605	0.0672285	44.3153	0.651676	0.653518
AGXT,C2orf54,SNED1_DUP	1	1	2247	3607	0.376184	1.37413	0.116832	16.1621	0.651676	0.653855
EYS_DEL	1	1	2247	3607	0.376184	1.37413	0.116832	16.1621	0.651676	0.654296
MGST1_DEL	1	1	2247	3607	0.376184	1.37413	0.116832	16.1621	0.651676	0.654823
EPYC,KERA_DEL	0	2	2248	3606	0.863719	0			0.651676	0.655128
C1orf74,CAMK1G,DIEXF,G0S2,HHAT,HSD11B1,IRF6,KCNH1,LAMB3,SERTAD4,SYT14,TRAF3IP3_DUP	1	1	2247	3607	0.875595	1.72605	0.0672285	44.3153	0.651676	0.655603
ACSS3,LIN7A,MYF5,MYF6,PPFIA2_DEL	1	1	2247	3607	0.376184	1.37413	0.116832	16.1621	0.651676	0.656003
KLHL1_DEL	0	2	2248	3606	0.863719	0			0.651676	0.65633
ERV3-1,ZNF107,ZNF117,ZNF138,ZNF273,ZNF679,ZNF680,ZNF727,ZNF736_DUP	0	2	2248	3606	0.863719	0			0.651676	0.656703
C16orf89,NAGPA,SEC14L5_DEL	1	1	2247	3607	0.376184	1.37413	0.116832	16.1621	0.651676	0.656982
BBOX1,FIBIN_DUP	0	1	2248	3607	0.512936	0			0.658229	0.657211
CCDC47,DDX42,FTSJ3,LIMD2,MAP3K3,PSMC5,SMARCD2,STRADA_DUP	1	0	2247	3608	0.927493	inf			0.658229	0.657471
CLCN7,IFT140,PTX4,TELO2,TMEM204_DEL	1	0	2247	3608	0.927493	inf			0.658229	0.657664
BAZ1A,CFL2_DUP	1	0	2247	3608	0.927493	inf			0.658229	0.657773
FAN1,KLF13,MTMR10,OTUD7A,TRPM1_DUP	1	0	2247	3608	0.927493	inf			0.658229	0.657878
EIF4B,IGFBP6,SOAT2,SPRYD3,TENC1_DUP	1	0	2247	3608	0.927493	inf			0.658229	0.657985
MAP2K6_DUP	1	0	2247	3608	0.927493	inf			0.658229	0.658055
ERC1_DEL	1	0	2247	3608	0.927493	inf			0.658229	0.658101
ACSBG1,CHRNA3,CHRNA5,CHRNB4,CIB2,CRABP1,DNAJA4,HYKK,IDH3A,IREB2,PSMA4,WDR61_DEL	1	0	2247	3608	0.927493	inf			0.658229	0.658131
B3GAT1_DUP	0	1	2248	3607	0.512936	0			0.658229	0.658151
BPI,KIAA1755,LBP_DEL	1	0	2247	3608	0.927493	inf			0.658229	0.658196
MPHOSPH6_DEL	1	0	2247	3608	0.927493	inf			0.658229	0.658209
BDKRB1,BDKRB2_DUP	1	0	2247	3608	0.927493	inf			0.658229	0.658212
ZNF28,ZNF320,ZNF321P,ZNF468,ZNF600,ZNF611,ZNF701,ZNF808,ZNF816,ZNF83_DUP	1	0	2247	3608	0.927493	inf			0.658229	0.658223
LILRA3,LILRA4,LILRA5,LILRB2,LILRB5_DEL	0	1	2248	3607	0.512936	0			0.658229	0.658229
TSPAN9_DUP	0	1	2248	3607	0.512936	0			0.658229	0.658229
ANKRD9,RCOR1,TECPR2_DUP	1	0	2247	3608	0.927493	inf			0.658229	0.658229
DYNC2H1_DUP	1	0	2247	3608	0.927493	inf			0.658229	0.658229
BTBD2,MKNK2_DEL	1	0	2247	3608	0.927493	inf			0.658229	0.658229
GNG7_DUP	1	0	2247	3608	0.927493	inf			0.658229	0.658229
DSG3,DSG4_DUP	1	0	2247	3608	0.927493	inf			0.658229	0.658229
DSC1,DSC2_DEL	0	1	2248	3607	0.512936	0			0.658229	0.658229
FBXL14,WNT5B_DEL	1	0	2247	3608	0.927493	inf			0.658229	0.658229
RXFP2_DUP	1	0	2247	3608	0.927493	inf			0.658229	0.658229
ZNF486,ZNF682,ZNF90_DEL	1	0	2247	3608	0.927493	inf			0.658229	0.658229
LITAF_DUP	1	0	2247	3608	0.927493	inf			0.658229	0.658229
CLEC2D,CLECL1,KLRB1_DUP	1	0	2247	3608	0.927493	inf			0.658229	0.658229
COQ7,ITPRIPL2,TMC7_DUP	1	0	2247	3608	0.927493	inf			0.658229	0.658229
KLHL17,NOC2L,PLEKHN1_DUP	1	0	2247	3608	0.927493	inf			0.658229	0.658229
MYOZ2,USP53_DEL	1	0	2247	3608	0.927493	inf			0.658229	0.658229
SLC8A1_DUP	1	0	2247	3608	0.927493	inf			0.658229	0.658229
DYNLT1,SYTL3,TMEM181_DEL	1	0	2247	3608	0.927493	inf			0.658229	0.658229
DES,SPEG_DUP	1	0	2247	3608	0.927493	inf			0.658229	0.658229
C7orf50,ZFAND2A_DEL	1	0	2247	3608	0.927493	inf			0.658229	0.658229
NXPH1_DUP	1	0	2247	3608	0.927493	inf			0.658229	0.658229
DNAH7,HECW2,STK17B_DEL	1	0	2247	3608	0.927493	inf			0.658229	0.658229
OLFML2B_DUP	1	0	2247	3608	0.927493	inf			0.658229	0.658229
DTX2,HSPB1,MDH2,POMZP3,POR,SRCRB4D,STYXL1,UPK3B,YWHAG,ZP3_DEL	0	1	2248	3607	0.512936	0			0.658229	0.658229
HGF_DEL	1	0	2247	3608	0.927493	inf			0.658229	0.658229
CACNA2D1,PCLO,SEMA3A,SEMA3E_DEL	1	0	2247	3608	0.927493	inf			0.658229	0.658229
CDK14,FZD1_DEL	1	0	2247	3608	0.927493	inf			0.658229	0.658229
ARG1,CTAGE9,ENPP1,ENPP3,MED23,OR2A4_DEL	1	0	2247	3608	0.927493	inf			0.658229	0.658229
KMT2E,SRPK2_DUP	1	0	2247	3608	0.927493	inf			0.658229	0.658229
FAM115A,OR2A12,OR2A14,OR2A2,OR2A25,OR2A5,OR2F1,OR2F2,OR6B1_DUP	1	0	2247	3608	0.927493	inf			0.658229	0.658229
TPK1_DEL	1	0	2247	3608	0.927493	inf			0.658229	0.658229
ACMSD,CCNT2,CXCR4,DARS,HNMT,LCT,MAP3K19,MCM6,MGAT5,NXPH2,R3HDM1,RAB3GAP1,SPOPL,TMEM163,UBXN4,ZRANB3_DEL	1	0	2247	3608	0.927493	inf			0.658229	0.658229
CLN8,DLGAP2_DUP	1	0	2247	3608	0.927493	inf			0.658229	0.658229
CSMD1_DUP	1	0	2247	3608	0.927493	inf			0.658229	0.658229
MSRA_DUP	0	1	2248	3607	0.512936	0			0.658229	0.658229
CTSB,DEFB134,DEFB135,DEFB136_DUP	1	0	2247	3608	0.927493	inf			0.658229	0.658229
PPP1R21_DUP	1	0	2247	3608	0.927493	inf			0.658229	0.658229
PSD3_DEL	1	0	2247	3608	0.927493	inf			0.658229	0.658229
FBXO11,MSH6_DUP	1	0	2247	3608	0.927493	inf			0.658229	0.658229
DMRT1_DUP	1	0	2247	3608	0.927493	inf			0.658229	0.658229
FAM180A,SLC13A4_DUP	1	0	2247	3608	0.927493	inf			0.658229	0.658229
IMPG1_DEL	1	0	2247	3608	0.927493	inf			0.658229	0.65823
CNKSR3_DUP	1	0	2247	3608	0.927493	inf			0.658229	0.658233
EIF3E,RSPO2_DEL	0	1	2248	3607	0.512936	0			0.658229	0.658241
NRG3_DEL	0	1	2248	3607	0.512936	0			0.658229	0.658251
ADAMTS12,AMACR,C1QTNF3,RXFP3,SLC45A2,TARS_DEL	1	0	2247	3608	0.927493	inf			0.658229	0.658264
KCNMA1_DUP	1	0	2247	3608	0.927493	inf			0.658229	0.65833
ARL15_DUP	0	1	2248	3607	0.512936	0			0.658229	0.65843
HSPB3_DUP	0	1	2248	3607	0.512936	0			0.658229	0.658536
EFHB_DEL	0	1	2248	3607	0.512936	0			0.658229	0.658732
NLGN1,SPATA16_DEL	0	1	2248	3607	0.512936	0			0.658229	0.658979
HOMER1_DUP	1	0	2247	3608	0.927493	inf			0.658229	0.659198
CTNND2_DUP	1	0	2247	3608	0.927493	inf			0.658229	0.659551
KCNAB1,LEKR1,SSR3,TIPARP_DUP	1	0	2247	3608	0.927493	inf			0.658229	0.659876
FIP1L1,SCFD2_DUP	1	0	2247	3608	0.927493	inf			0.658229	0.660561
C3orf79,RAP2B_DUP	1	0	2247	3608	0.927493	inf			0.658229	0.661274
CEP120_DEL	1	0	2247	3608	0.927493	inf			0.658229	0.662204
MAGI1_DUP	1	0	2247	3608	0.927493	inf			0.658229	0.663185
C1orf87,CYP2J2,HOOK1_DUP	0	1	2248	3607	0.512936	0			0.658229	0.664441
IL12RB2,IL23R_DUP	1	0	2247	3608	0.927493	inf			0.658229	0.665609
NEDD9_DUP	1	0	2247	3608	0.927493	inf			0.658229	0.666927
HIVEP1_DUP	1	0	2247	3608	0.927493	inf			0.658229	0.668582
CDKN2AIP_DUP	1	0	2247	3608	0.927493	inf			0.658229	0.670025
KCNIP4_DEL	1	0	2247	3608	0.927493	inf			0.658229	0.671341
PSPC1,ZMYM5_DUP	2	3	2246	3605	0.844864	1.05938	0.1259	8.91408	0.659402	0.672658
XYLT1_DUP	1	2	2247	3606	0.912976	0.808078	0.066262	9.85467	0.65955	0.6741
CYFIP1,NIPA1,NIPA2,TUBGCP5_DUP	11	14	2237	3594	0.857588	1.35018	0.563934	3.23262	0.669423	0.675378
FAM57A,GEMIN4,GLOD4,NXN,RNMTL1,VPS53_DUP	1	2	2247	3606	0.848063	1.33366	0.120801	14.7238	0.679907	0.676492
GLT8D1,GNL3,ITIH1,NEK4,PBRM1,PRKCD,RFT1,SFMBT1,SPCS1,TKT,TMEM110,TMEM110-MUSTN1_DUP	1	2	2247	3606	0.848063	1.33366	0.120801	14.7238	0.679907	0.677599
PAPOLG_DUP	1	2	2247	3606	0.848063	1.33366	0.120801	14.7238	0.679907	0.678764
NREP_DEL	1	2	2247	3606	0.848063	1.33366	0.120801	14.7238	0.679907	0.680043
CALN1_DUP	1	2	2247	3606	0.848063	1.33366	0.120801	14.7238	0.679907	0.681279
XRCC5_DUP	1	2	2247	3606	0.848063	1.33366	0.120801	14.7238	0.679907	0.682566
IGSF6,METTL9,OTOA_DEL	0	3	2248	3605	0.949552	0			0.679907	0.684304
OR52B4,OR52K2,TRIM21_DUP	0	3	2248	3605	0.949552	0			0.679907	0.685914
RP1L1_DEL	1	2	2247	3606	0.848063	1.33366	0.120801	14.7238	0.679907	0.688126
GCSAML,NLRP3,OR11L1,OR13G1,OR14A16,OR1C1,OR2AK2,OR2B11,OR2C3,OR2G2,OR2G3,OR2L13,OR2L2,OR2L3,OR2L5,OR2L8,OR2M2,OR2M3,OR2M4,OR2M5,OR2T8,OR2W3,OR6F1,TRIM58,ZNF124,ZNF496_DUP	1	2	2247	3606	0.848063	1.33366	0.120801	14.7238	0.679907	0.6903
ABI1,ACBD5,ANKRD26,MASTL,YME1L1_DUP	1	2	2247	3606	0.848063	1.33366	0.120801	14.7238	0.679907	0.692766
SNTG2_DEL	1	2	2247	3606	0.848063	1.33366	0.120801	14.7238	0.679907	0.695769
RBM20_DEL	1	2	2247	3606	0.848063	1.33366	0.120801	14.7238	0.679907	0.699414
RGS7_DUP	1	2	2247	3606	0.848063	1.33366	0.120801	14.7238	0.679907	0.703059
PRSS38,SNAP47,WNT9A_DUP	0	3	2248	3605	0.949552	0			0.679907	0.707401
C22orf43,IGLL1_DUP	0	3	2248	3605	0.949552	0			0.679907	0.711754
SNTG2_DUP	2	7	2246	3601	0.998348	0.495417	0.0855279	2.86968	0.689339	0.715731
ATF7IP2,EMP2,NUBP1,TEKT5_DEL	1	1	2247	3607	0.438603	0.670311	0.0523236	8.58728	0.691663	0.720075
BTG3,CXADR_DUP	2	0	2246	3608	0.937063	inf			0.691663	0.724756
GCNT2_DEL	3	3	2245	3605	0.920357	2.14392	0.382511	12.0163	0.691877	0.728775
BMP8B,OXCT2,PPIE_DUP	2	4	2246	3604	0.995488	0.939524	0.138132	6.39032	0.691877	0.732312
H6PD_DUP	2	4	2246	3604	0.995488	0.939524	0.138132	6.39032	0.691877	0.735213
LYN,TGS1_DUP	4	3	2244	3605	0.997038	2.19319	0.376184	12.7865	0.69402	0.737557
SYTL2_DEL	1	4	2247	3604	0.583501	0.453237	0.0576778	3.56158	0.718531	0.739623
ANXA11,PLAC9,SFTPD,TMEM254_DUP	3	11	2245	3597	0.833882	0.641056	0.168747	2.43532	0.732143	0.74115
KMT2C_DUP	1	2	2247	3606	0.995414	0.545833	0.0229315	12.9924	0.745822	0.742323
NCKAP5_DEL	1	2	2247	3606	0.995414	0.545833	0.0229315	12.9924	0.745822	0.74328
ACTR3C,GIMAP2,GIMAP4,GIMAP6,GIMAP7,GIMAP8,LRRC61,RARRES2,REPIN1,ZBED6CL,ZNF775_DUP	2	1	2246	3607	0.872972	3.76105	0.256271	55.1974	0.745822	0.744219
BCL2L1,CCM2L,COX4I2,DEFB115,DEFB116,DEFB118,DEFB119,DEFB121,DEFB123,DEFB124,DUSP15,FOXS1,HCK,HM13,ID1,MYLK2,PDRG1,REM1,TM9SF4,TPX2,TTLL9,XKR7_DUP	2	1	2246	3607	0.872972	3.76105	0.256271	55.1974	0.745822	0.744965
TRPM3_DUP	1	2	2247	3606	0.389092	0.745851	0.0851506	6.53306	0.745822	0.745777
CNTN5_DUP	2	1	2246	3607	0.10467	2.0712	0.27884	15.3847	0.745822	0.746423
SASH1_DUP	2	1	2246	3607	0.872972	3.76105	0.256271	55.1974	0.745822	0.747065
C19orf84,CLDND2,ETFB,IGLON5,LIM2,NKG7,SIGLEC10,SIGLEC12,SIGLEC8,VSIG10L_DUP	1	2	2247	3606	0.995414	0.545833	0.0229315	12.9924	0.745822	0.747706
TMEM2_DUP	1	2	2247	3606	0.389092	0.745851	0.0851506	6.53306	0.745822	0.748364
CDH13_DEL	1	2	2247	3606	0.995414	0.545833	0.0229315	12.9924	0.745822	0.749245
ANTXR2_DEL	1	2	2247	3606	0.995414	0.545833	0.0229315	12.9924	0.745822	0.750157
LPHN3_DUP	2	1	2246	3607	0.872972	3.76105	0.256271	55.1974	0.745822	0.751091
RBFOX1_DUP	2	1	2246	3607	0.872972	3.76105	0.256271	55.1974	0.745822	0.752093
CPZ,GPR78,TRMT44_DEL	2	1	2246	3607	0.872972	3.76105	0.256271	55.1974	0.745822	0.753211
C15orf32,ST8SIA2_DUP	2	1	2246	3607	0.455321	2.77986	0.266032	29.0477	0.748317	0.754144
AGR3_DUP	1	2	2247	3606	0.663676	0.709536	0.0625796	8.04481	0.748317	0.755298
ZNF557_DUP	4	5	2244	3603	0.264254	0.973126	0.258666	3.66099	0.749886	0.756268
PTCHD3_DEL	2	2	2246	3606	0.302939	0.832142	0.130613	5.30163	0.752378	0.757208
ALPP,ALPPL2_DUP	1	1	2247	3607	0.78286	2.08647	0.0984538	44.2173	0.759733	0.758088
C16orf52,CDR2,EEF2K,PDZD9,POLR3E,UQCRC2,VWA3A_DUP	1	1	2247	3607	0.78286	2.08647	0.0984538	44.2173	0.759733	0.75898
C1QTNF8,CACNA1H,CHTF18,GNG13,LMF1,PRR25,RPUSD1,SOX8,SSTR5_DUP	1	1	2247	3607	0.446206	1.68756	0.130214	21.8704	0.759733	0.759788
ARL4D,DHX8_DUP	0	2	2248	3606	0.937573	0			0.759733	0.760713
AGMO_DEL	1	1	2247	3607	0.78286	2.08647	0.0984538	44.2173	0.759733	0.761541
ALG14,CNN3,RWDD3,SLC44A3,TMEM56,TMEM56-RWDD3_DUP	1	1	2247	3607	0.78286	2.08647	0.0984538	44.2173	0.759733	0.762585
JMJD7,JMJD7-PLA2G4B,MAPKBP1,MGA,PLA2G4B,SPTBN5_DUP	1	1	2247	3607	0.78286	2.08647	0.0984538	44.2173	0.759733	0.763623
THSD4_DEL	0	2	2248	3606	0.937573	0			0.759733	0.764999
FPGT,FPGT-TNNI3K,LRRIQ3,TNNI3K_DUP	1	1	2247	3607	0.78286	2.08647	0.0984538	44.2173	0.759733	0.766465
MGAM,PRSS58,TAS2R38_DUP	1	1	2247	3607	0.78286	2.08647	0.0984538	44.2173	0.759733	0.76809
ERC1_DUP	0	2	2248	3606	0.937573	0			0.759733	0.769767
MALL,NPHP1_DEL	1	1	2247	3607	0.446206	1.68756	0.130214	21.8704	0.759733	0.771932
C1QTNF9,C1QTNF9B,MIPEP,SACS,SGCG,SPATA13,TNFRSF19_DUP	1	1	2247	3607	0.78286	2.08647	0.0984538	44.2173	0.759733	0.774004
MPDZ_DEL	0	2	2248	3606	0.937573	0			0.759733	0.776425
CNTN6_DUP	4	4	2244	3604	0.80585	1.06849	0.241068	4.73588	0.768634	0.778855
CEP85L,PLN_DUP	2	3	2246	3605	0.987959	1.25303	0.166688	9.41924	0.769589	0.781683
ANKRD34A,ANKRD35,CD160,HFE2,ITGA10,LIX1L,NUDT17,PEX11B,PIAS3,POLR3C,POLR3GL,RBM8A,RNF115,TXNIP_DUP	2	3	2246	3605	0.987959	1.25303	0.166688	9.41924	0.769589	0.784626
KAT2B,PP2D1_DUP	2	3	2246	3605	0.987959	1.25303	0.166688	9.41924	0.769589	0.788001
MYT1L,PXDN_DUP	2	7	2246	3601	0.979305	0.536449	0.0904483	3.18168	0.774226	0.792243
C1orf63,RHD,SYF2,TMEM50A_DUP	2	7	2246	3601	0.622819	0.621442	0.136033	2.83894	0.774226	0.796561
AADACL3,AADACL4,C1orf158,DHRS3,HNRNPCL1,PRAMEF1,PRAMEF10,PRAMEF11,PRAMEF12,PRAMEF2,PRAMEF22,PRAMEF4,PRAMEF6,PRAMEF7,VPS13D_DUP	3	6	2245	3602	0.420045	1.05622	0.276289	4.03777	0.774226	0.800839
OR10AG1,OR4A15,OR4A16,OR4C11,OR4C15,OR4C16,OR4C6,OR4P4,OR4S2,OR5AS1,OR5D13,OR5D14,OR5D16,OR5D18,OR5F1,OR5I1,OR5J2,OR5L1,OR5L2,OR5T2,OR5W2,OR8H2,OR8H3,OR8I2,OR8J3,OR8K5_DUP	2	5	2246	3603	0.879226	0.878424	0.151725	5.08571	0.780339	0.805929
KRT83,KRT86_DUP	3	2	2245	3606	0.980742	2.4264	0.295353	19.9335	0.782881	0.811586
C18orf63,CBLN2,CCDC102B,CD226,CNDP1,CNDP2,CYB5A,DOK6,DSEL,FAM69C,FBXO15,GTSCR1,NETO1,RTTN,SMIM21,SOCS6,TIMM21,TMX3,TSHZ1,ZADH2,ZNF407_DEL	2	2	2246	3606	0.744594	2.37792	0.304849	18.5486	0.784305	0.817374
FHIT_DUP	2	2	2246	3606	0.744594	2.37792	0.304849	18.5486	0.784305	0.823336
CACNA2D1,PCLO,SEMA3A,SEMA3E_DUP	1	4	2247	3604	0.673315	0.42231	0.0433295	4.11604	0.789645	0.829874
CCDC86,MS4A10,MS4A15,PTGDR2_DEL	3	6	2245	3602	0.93992	0.913979	0.18851	4.43138	0.791303	0.836627
CTNNA3_DEL	4	3	2244	3605	0.327351	1.58183	0.359846	6.95345	0.796185	0.843173
ALDOA,ASPHD1,C16orf54,C16orf92,CDIPT,CORO1A,DOC2A,FAM57B,GDPD3,HIRIP3,INO80E,KCTD13,KIF22,MAPK3,MAZ,MVP,PAGR1,PPP4C,PRRT2,QPRT,SEZ6L2,SPN,TAOK2,TBX6,TMEM219,YPEL3,ZG16_DEL	1	2	2247	3606	0.86751	0.304551	0.0209381	4.42978	0.821311	0.849064
FSHR_DEL	4	3	2244	3605	0.594937	1.57682	0.323977	7.67454	0.85871	0.854339
OR4K1,OR4K5_DUP	4	3	2244	3605	0.476729	1.21729	0.240848	6.15243	0.864247	0.859754
ABCC1,ABCC6,C16orf45,FOPNL,KIAA0430,MPV17L,MYH11,NDE1,NPIPA5,NTAN1,PDXDC1,RRN3_DUP	3	7	2245	3601	0.811998	0.701331	0.173871	2.82891	0.864325	0.864017
ACP6,BCL9,CHD1L,FMO5,GJA5,GJA8,GPR89B,NBPF24,PRKAB2_DUP	1	3	2247	3605	0.732889	0.676552	0.0772155	5.92786	0.868099	0.868145
ATP2C2_DEL	2	2	2246	3606	0.830802	2.19754	0.266606	18.1135	0.868099	0.871508
WWOX_DEL	1	3	2247	3605	0.857966	0.57535	0.0426371	7.76386	0.868099	0.87404
TRIM48_DUP	2	2	2246	3606	0.830802	2.19754	0.266606	18.1135	0.868099	0.876631
PTPRM_DUP	3	5	2245	3603	0.909275	0.816292	0.158481	4.20449	0.874981	0.879153
ZNF626_DUP	3	5	2245	3603	0.909275	0.816292	0.158481	4.20449	0.874981	0.881109
ALDOA,ASPHD1,C16orf54,C16orf92,CDIPT,CORO1A,DOC2A,FAM57B,GDPD3,HIRIP3,INO80E,KCTD13,KIF22,MAPK3,MAZ,MVP,PAGR1,PPP4C,PRRT2,QPRT,SEZ6L2,SPN,TAOK2,TBX6,TMEM219,YPEL3,ZG16_DUP	2	0	2246	3608	0.954842	inf			0.882583	0.882846
ABHD11,BAZ1B,BCL7B,CCL24,CCL26,CLDN3,CLDN4,CLIP2,DNAJC30,EIF4H,ELN,FKBP6,FZD9,GATSL2,GTF2I,GTF2IRD1,GTF2IRD2,GTF2IRD2B,HIP1,LAT2,LIMK1,MLXIPL,NCF1,POM121C,RFC2,RHBDD2,STX1A,TBL2,TRIM73,VPS37D,WBSCR16,WBSCR22,WBSCR27,WBSCR28_DUP	2	0	2246	3608	0.954842	inf			0.882583	0.884211
DTX2,HSPB1,MDH2,POMZP3,POR,SRCRB4D,STYXL1,UPK3B,YWHAG,ZP3_DUP	2	0	2246	3608	0.954842	inf			0.882583	0.885331
FAM114A1,TMEM156_DEL	2	0	2246	3608	0.954842	inf			0.882583	0.886462
SP140L_DUP	2	0	2246	3608	0.954842	inf			0.882583	0.887213
BTBD17,C17orf77,CD300A,CD300C,CD300E,CD300LD,DNAI2,GPR142,GPRC5C,KIF19,RAB37,RPL38,TTYH2_DUP	8	16	2240	3592	0.449264	0.85368	0.357956	2.03592	0.885739	0.887807
SGMS1_DUP	5	7	2243	3601	0.346918	1.29249	0.409382	4.08059	0.887678	0.888247
TAS2R1_DEL	0	1	2248	3607	0.797995	0			0.889126	0.888559
C19orf84,CLDND2,ETFB,IGLON5,LIM2,NKG7,SIGLEC10,SIGLEC12,SIGLEC8,VSIG10L_DEL	1	0	2247	3608	0.709245	inf			0.889126	0.888735
ABHD2,FANCI,POLG,RLBP1_DUP	1	0	2247	3608	0.709245	inf			0.889126	0.888918
SYNPR_DUP	0	1	2248	3607	0.797995	0			0.889126	0.888999
ARL10,CLTB,HIGD2A,KIAA1191,NOP16,SIMC1_DUP	0	1	2248	3607	0.797995	0			0.889126	0.889072
C8orf48,DLC1_DEL	0	1	2248	3607	0.797995	0			0.889126	0.889101
AFF1,KLHL8_DUP	1	0	2247	3608	0.709245	inf			0.889126	0.88911
MTERFD1,PTDSS1,UQCRB_DUP	1	0	2247	3608	0.709245	inf			0.889126	0.889124
PRKCE_DUP	1	0	2247	3608	0.709245	inf			0.889126	0.889126
NRXN1_DUP	1	0	2247	3608	0.709245	inf			0.889126	0.889126
NUDT12_DEL	1	0	2247	3608	0.709245	inf			0.889126	0.889126
ST8SIA4_DEL	0	1	2248	3607	0.797995	0			0.889126	0.889126
AQP2_DUP	1	0	2247	3608	0.709245	inf			0.889126	0.889126
DHODH_DEL	0	1	2248	3607	0.797995	0			0.889126	0.889126
CMTR2_DUP	0	1	2248	3607	0.797995	0			0.889126	0.889126
FNDC3B_DEL	1	0	2247	3608	0.709245	inf			0.889126	0.889126
TLL2_DEL	0	1	2248	3607	0.797995	0			0.889126	0.889126
NKAIN3_DUP	0	1	2248	3607	0.797995	0			0.889126	0.889126
TRA2B_DUP	0	1	2248	3607	0.797995	0			0.889126	0.889126
SLC2A9,WDR1_DUP	1	0	2247	3608	0.709245	inf			0.889126	0.889126
SBF2_DEL	1	0	2247	3608	0.709245	inf			0.889126	0.889126
STX8_DEL	0	1	2248	3607	0.797995	0			0.889126	0.889126
SEMA5A_DEL	0	1	2248	3607	0.797995	0			0.889126	0.889126
DTNB_DEL	1	0	2247	3608	0.709245	inf			0.889126	0.889126
CEP19,FBXO45,NRROS,PIGX,RNF168,SMCO1,UBXN7,WDR53_DUP	0	1	2248	3607	0.797995	0			0.889126	0.889126
KAZN_DUP	0	1	2248	3607	0.797995	0			0.889126	0.889126
NOMO3,NPIPA7_DUP	0	1	2248	3607	0.797995	0			0.889126	0.889126
TTC21B_DUP	1	0	2247	3608	0.709245	inf			0.889126	0.889126
UGT1A1_DEL	1	0	2247	3608	0.709245	inf			0.889126	0.889126
ABCA12_DEL	0	1	2248	3607	0.797995	0			0.889126	0.889126
CCDC115,IMP4,MZT2B,PTPN18,TUBA3E_DEL	0	1	2248	3607	0.797995	0			0.889126	0.889126
NFAM1_DUP	1	0	2247	3608	0.709245	inf			0.889126	0.889126
C1GALT1,COL28A1,MIOS,RPA3_DUP	1	0	2247	3608	0.709245	inf			0.889126	0.889126
MELK,RNF38_DUP	0	1	2248	3607	0.797995	0			0.889126	0.889126
COL22A1,FAM135B_DUP	1	0	2247	3608	0.709245	inf			0.889126	0.889126
BMP4_DUP	1	0	2247	3608	0.709245	inf			0.889126	0.889126
ATL1,ATP5S,CDKL1,L2HGDH,NIN,SAV1_DUP	1	0	2247	3608	0.709245	inf			0.889126	0.889126
UGT1A10_DEL	1	0	2247	3608	0.709245	inf			0.889126	0.889126
ARMC2,SESN1_DEL	1	0	2247	3608	0.709245	inf			0.889126	0.889126
MAP3K7_DUP	1	0	2247	3608	0.709245	inf			0.889126	0.889127
PLXDC2_DEL	0	1	2248	3607	0.797995	0			0.889126	0.889133
ADARB2_DUP	0	1	2248	3607	0.797995	0			0.889126	0.889139
ANKS1A,C6orf106,SNRPC,TAF11,UHRF1BP1_DUP	1	0	2247	3608	0.709245	inf			0.889126	0.889168
LLGL2,TSEN54_DUP	1	0	2247	3608	0.709245	inf			0.889126	0.889206
CALCR_DUP	1	0	2247	3608	0.709245	inf			0.889126	0.889301
GALNT13_DUP	1	0	2247	3608	0.709245	inf			0.889126	0.889461
PTPRT_DEL	1	0	2247	3608	0.709245	inf			0.889126	0.889747
DCPS_DUP	0	1	2248	3607	0.797995	0			0.889126	0.890163
CD109,SLC17A5_DUP	1	0	2247	3608	0.709245	inf			0.889126	0.890888
GPCPD1_DUP	0	1	2248	3607	0.797995	0			0.889126	0.891953
TLN2_DEL	1	0	2247	3608	0.709245	inf			0.889126	0.893308
FAM81A,MYO1E_DEL	0	1	2248	3607	0.797995	0			0.889126	0.895117
RGPD3,ST6GAL2_DEL	0	1	2248	3607	0.797995	0			0.889126	0.89711
IGDCC3,PARP16_DUP	0	1	2248	3607	0.797995	0			0.889126	0.899743
DNAH11_DEL	1	4	2247	3604	0.938286	0.666339	0.0743888	5.96874	0.891028	0.902608
PARK2_DEL	3	7	2245	3601	0.412986	0.873617	0.238417	3.20114	0.896924	0.90625
IMPAD1_DEL	2	4	2246	3604	0.85311	1.33399	0.243964	7.29424	0.900457	0.910205
FNDC1_DUP	3	2	2245	3606	0.571956	1.79031	0.264621	12.1124	0.900523	0.914109
OR10AG1,OR4A15,OR4A16,OR4C11,OR4C15,OR4C16,OR4C6,OR4P4,OR4S2,OR5AS1,OR5D13,OR5D14,OR5D16,OR5D18,OR5F1,OR5I1,OR5J2,OR5L1,OR5L2,OR5T2,OR5W2,OR8H2,OR8H3,OR8I2,OR8J3,OR8K5_DEL	2	1	2246	3607	0.557592	2.3784	0.209957	26.9426	0.907335	0.918594
YWHAE_DUP	2	1	2246	3607	0.909214	3.17814	0.179129	56.387	0.907335	0.923587
NRXN1_DEL	2	1	2246	3607	0.909214	3.17814	0.179129	56.387	0.907335	0.927863
EHD4,PLA2G4E_DUP	2	3	2246	3605	0.13531	0.772832	0.152419	3.9186	0.907933	0.931923
NTF3_DUP	3	5	2245	3603	0.346558	1.21712	0.306678	4.83041	0.929741	0.935145
PARK2_DUP	10	18	2238	3590	0.381495	0.877638	0.376212	2.04738	0.92977	0.937442
FAM19A3,LRIG2,MOV10,PPM1J,RHOC,SLC16A1_DUP	1	1	2247	3607	0.729746	2.66831	0.166743	42.6996	0.94246	0.939365
CST11,CST8,CST9L,CSTL1_DUP	0	2	2248	3606	0.951054	0			0.94246	0.940797
COBLL1_DUP	1	1	2247	3607	0.729746	2.66831	0.166743	42.6996	0.94246	0.941518
ADAD2,DNAAF1,HSBP1,HSDL1,KCNG4,MBTPS1,MLYCD,NECAB2,OSGIN1,SLC38A8,TAF1C,WFDC1_DEL	0	2	2248	3606	0.951054	0			0.94246	0.941945
USP25_DUP	1	1	2247	3607	0.729746	2.66831	0.166743	42.6996	0.94246	0.94222
CCSER1_DUP	1	1	2247	3607	0.729746	2.66831	0.166743	42.6996	0.94246	0.942396
ZNF331,ZNF813_DUP	0	2	2248	3606	0.951054	0			0.94246	0.942428
C2orf61,CALM2,CRIPT,MCFD2,PIGF,RHOQ,SOCS5,TTC7A_DUP	0	2	2248	3606	0.951054	0			0.94246	0.942452
CETN1,CLUL1,COLEC12_DEL	0	2	2248	3606	0.951054	0			0.94246	0.942456
TOP3B_DUP	0	2	2248	3606	0.951054	0			0.94246	0.94246
PROKR2_DEL	0	2	2248	3606	0.951054	0			0.94246	0.94246
ACOXL,ANAPC1,BCL2L11,BUB1,FBLN7,MERTK,TMEM87B,ZC3H6,ZC3H8_DEL	1	1	2247	3607	0.729746	2.66831	0.166743	42.6996	0.94246	0.94246
MAST2,PIK3R3_DUP	1	1	2247	3607	0.729746	2.66831	0.166743	42.6996	0.94246	0.94246
HPCAL1,NOL10,ODC1_DUP	1	1	2247	3607	0.729746	2.66831	0.166743	42.6996	0.94246	0.94246
TPO_DEL	0	2	2248	3606	0.951054	0			0.94246	0.94246
CCDC150_DUP	1	1	2247	3607	0.729746	2.66831	0.166743	42.6996	0.94246	0.94246
C20orf166,SLCO4A1_DUP	1	1	2247	3607	0.729746	2.66831	0.166743	42.6996	0.94246	0.94246
ELTD1_DEL	1	1	2247	3607	0.729746	2.66831	0.166743	42.6996	0.94246	0.94246
BCR,GNAZ,RAB36,RTDR1_DUP	1	1	2247	3607	0.729746	2.66831	0.166743	42.6996	0.94246	0.94246
CCDC85A_DEL	1	1	2247	3607	0.729746	2.66831	0.166743	42.6996	0.94246	0.94246
C11orf40,OR51D1,OR51E1,OR51E2,OR51F1,OR51F2,OR51S1,OR52I1,OR52I2,OR52K1,OR52M1,OR52R1,TRIM68_DUP	0	2	2248	3606	0.951054	0			0.94246	0.94246
ACAN,AEN,DET1,HAPLN3,ISG20,MFGE8,MRPL46,MRPS11_DUP	1	1	2247	3607	0.729746	2.66831	0.166743	42.6996	0.94246	0.94246
PFKP,PITRM1_DEL	1	1	2247	3607	0.729746	2.66831	0.166743	42.6996	0.94246	0.94246
LIPC_DEL	0	2	2248	3606	0.951054	0			0.94246	0.94246
UBASH3B_DUP	1	1	2247	3607	0.729746	2.66831	0.166743	42.6996	0.94246	0.94246
FTSJ2,MAD1L1,NUDT1,SNX8_DEL	0	2	2248	3606	0.951054	0			0.94246	0.94246
NTM,SNX19_DUP	0	2	2248	3606	0.951054	0			0.94246	0.94246
AHNAK2,C14orf79,CDCA4,PLD4_DUP	0	2	2248	3606	0.951054	0			0.94246	0.94246
IZUMO3_DEL	0	2	2248	3606	0.951054	0			0.94246	0.94246
TMEM132D_DUP	1	1	2247	3607	0.729746	2.66831	0.166743	42.6996	0.94246	0.94246
LAMA2_DEL	0	2	2248	3606	0.951054	0			0.94246	0.94246
GLDC_DEL	0	2	2248	3606	0.951054	0			0.94246	0.94246
RXFP2_DEL	0	2	2248	3606	0.951054	0			0.94246	0.94246
SLC28A1_DEL	0	2	2248	3606	0.951054	0			0.94246	0.94246
ACACB_DUP	1	1	2247	3607	0.729746	2.66831	0.166743	42.6996	0.94246	0.94246
ADAMTS20_DEL	0	2	2248	3606	0.951054	0			0.94246	0.94246
NPBWR1_DUP	1	1	2247	3607	0.729746	2.66831	0.166743	42.6996	0.94246	0.94246
UNC13C_DEL	0	2	2248	3606	0.951054	0			0.94246	0.94246
MICA_DUP	0	2	2248	3606	0.951054	0			0.94246	0.94246
AP5Z1,RADIL_DEL	1	1	2247	3607	0.729746	2.66831	0.166743	42.6996	0.94246	0.94246
PANX1_DUP	0	2	2248	3606	0.951054	0			0.94246	0.94246
MSR1,SGCZ,TUSC3_DEL	0	2	2248	3606	0.951054	0			0.94246	0.94246
GLRA3_DEL	0	2	2248	3606	0.951054	0			0.94246	0.94246
RRM1,STIM1_DUP	0	2	2248	3606	0.951054	0			0.94246	0.94246
ABCC1,ABCC6,C16orf45,FOPNL,KIAA0430,MPV17L,MYH11,NDE1,NPIPA5,NTAN1,PDXDC1,RRN3_DEL	1	1	2247	3607	0.729746	2.66831	0.166743	42.6996	0.94246	0.94246
ATP6V0E2,ZNF467,ZNF862_DUP	1	1	2247	3607	0.729746	2.66831	0.166743	42.6996	0.94246	0.94246
POM121L12_DUP	1	1	2247	3607	0.729746	2.66831	0.166743	42.6996	0.94246	0.94246
MINPP1_DEL	0	2	2248	3606	0.951054	0			0.94246	0.94246
CLEC3A_DUP	0	2	2248	3606	0.951054	0			0.94246	0.94246
CLEC3A_DEL	0	2	2248	3606	0.951054	0			0.94246	0.94246
MARCH8_DEL	1	1	2247	3607	0.729746	2.66831	0.166743	42.6996	0.94246	0.942462
ADAMTS18,MON1B,NUDT7,SYCE1L,VAT1L_DEL	0	2	2248	3606	0.951054	0			0.94246	0.942478
RPS3A,SH3D19_DUP	0	2	2248	3606	0.951054	0			0.94246	0.942532
NEURL1,SH3PXD2A_DUP	1	1	2247	3607	0.729746	2.66831	0.166743	42.6996	0.94246	0.942762
SPCS3_DUP	1	1	2247	3607	0.729746	2.66831	0.166743	42.6996	0.94246	0.943352
LDB3,OPN4,WAPAL_DUP	0	2	2248	3606	0.951054	0			0.94246	0.944459
CUBN,RSU1_DUP	0	2	2248	3606	0.951054	0			0.94246	0.946099
ARHGEF4_DUP	0	1	2248	3607	0.713278	0			0.953256	0.948088
METAP2,USP44_DUP	1	0	2247	3608	0.794689	inf			0.953256	0.949903
FAHD2A,KCNIP3,PROM2_DUP	0	1	2248	3607	0.713278	0			0.953256	0.951498
ANKS1B_DEL	0	1	2248	3607	0.713278	0			0.953256	0.952489
PRSS55_DUP	1	0	2247	3608	0.794689	inf			0.953256	0.952926
C12orf65,CDK2AP1,MPHOSPH9,RILPL1,RILPL2,SBNO1,SETD8,SNRNP35_DUP	1	0	2247	3608	0.794689	inf			0.953256	0.953165
C2orf76,DBI_DUP	0	1	2248	3607	0.713278	0			0.953256	0.953225
ATP12A_DUP	1	0	2247	3608	0.794689	inf			0.953256	0.953252
ARFGEF2_DUP	0	1	2248	3607	0.713278	0			0.953256	0.953256
CRYL1,GJB6_DEL	1	0	2247	3608	0.794689	inf			0.953256	0.953256
CNTNAP5_DEL	1	0	2247	3608	0.794689	inf			0.953256	0.953256
ERICH1_DUP	1	0	2247	3608	0.794689	inf			0.953256	0.953256
P2RX2,POLE_DUP	1	0	2247	3608	0.794689	inf			0.953256	0.953256
RP1L1_DUP	1	0	2247	3608	0.794689	inf			0.953256	0.953256
RAB6C_DUP	0	1	2248	3607	0.713278	0			0.953256	0.953256
TRAM1L1_DUP	1	0	2247	3608	0.794689	inf			0.953256	0.953256
ASAH1_DEL	0	1	2248	3607	0.713278	0			0.953256	0.953256
PIGP,RIPPLY3,TTC3_DEL	1	0	2247	3608	0.794689	inf			0.953256	0.953256
CTNNA3_DUP	1	0	2247	3608	0.794689	inf			0.953256	0.953256
OR4A47_DEL	0	1	2248	3607	0.713278	0			0.953256	0.953256
TRABD2B_DUP	1	0	2247	3608	0.794689	inf			0.953256	0.953256
CCNY,CREM_DUP	1	0	2247	3608	0.794689	inf			0.953256	0.953256
PLEKHB1_DUP	1	0	2247	3608	0.794689	inf			0.953256	0.953256
ALG8,INTS4,KCTD14,NDUFC2,NDUFC2-KCTD14,THRSP_DUP	0	1	2248	3607	0.713278	0			0.953256	0.953256
BIRC2,BIRC3,TMEM123_DEL	1	0	2247	3608	0.794689	inf			0.953256	0.953256
AKR1C3,AKR1C4_DEL	0	1	2248	3607	0.713278	0			0.953256	0.953256
CASQ2_DUP	1	0	2247	3608	0.794689	inf			0.953256	0.953256
OR1J1,OR1J2,OR1J4,OR1N1,OR1N2,PTGS1_DEL	0	1	2248	3607	0.713278	0			0.953256	0.953256
C8orf74,PINX1,SOX7,XKR6_DUP	1	0	2247	3608	0.794689	inf			0.953256	0.953256
ACTL7A,ACTL7B,CTNNAL1,FAM206A,IKBKAP,TMEM245_DUP	1	0	2247	3608	0.794689	inf			0.953256	0.953256
CCDC77_DUP	1	0	2247	3608	0.794689	inf			0.953256	0.953256
ACER2,ADAMTSL1,DENND4C,FAM154A,HAUS6,PLIN2,RPS6,RRAGA,SLC24A2_DEL	1	0	2247	3608	0.794689	inf			0.953256	0.953256
FGF23,FGF6_DUP	1	0	2247	3608	0.794689	inf			0.953256	0.953256
LILRA3,LILRA4,LILRA5,LILRB2,LILRB5_DUP	1	0	2247	3608	0.794689	inf			0.953256	0.953256
PTPRD_DUP	1	0	2247	3608	0.794689	inf			0.953256	0.953256
APOBEC1_DUP	0	1	2248	3607	0.713278	0			0.953256	0.953256
KCNV2,KIAA0020,VLDLR_DEL	1	0	2247	3608	0.794689	inf			0.953256	0.953256
C8orf31,EEF1D,GSDMD,LY6E,LY6H,MROH6,NAPRT1,PYCRL,TIGD5,TSTA3,ZC3H3,ZNF623_DEL	0	1	2248	3607	0.713278	0			0.953256	0.953256
ARNTL2,PPFIBP1,SMCO2,STK38L_DEL	1	0	2247	3608	0.794689	inf			0.953256	0.953256
PPM1B_DUP	0	1	2248	3607	0.713278	0			0.953256	0.953256
NAT1_DEL	1	0	2247	3608	0.794689	inf			0.953256	0.953256
CDON,DDX25_DEL	1	0	2247	3608	0.794689	inf			0.953256	0.953256
LRRN3_DUP	1	0	2247	3608	0.794689	inf			0.953256	0.953256
SUCLA2_DEL	1	0	2247	3608	0.794689	inf			0.953256	0.953256
BPIFA1,BPIFA2,BPIFA3_DEL	1	0	2247	3608	0.794689	inf			0.953256	0.953256
ACSS2,GSS,MYH7B,TRPC4AP_DEL	1	0	2247	3608	0.794689	inf			0.953256	0.953256
EPHA6_DEL	0	1	2248	3607	0.713278	0			0.953256	0.953256
PLOD2_DUP	1	0	2247	3608	0.794689	inf			0.953256	0.953256
P2RY1_DEL	1	0	2247	3608	0.794689	inf			0.953256	0.953256
C3orf79,RAP2B_DEL	1	0	2247	3608	0.794689	inf			0.953256	0.953256
ADAMTS17_DUP	0	1	2248	3607	0.713278	0			0.953256	0.953256
CCDC112,KCNN2,PGGT1B,TRIM36_DUP	0	1	2248	3607	0.713278	0			0.953256	0.953256
ARSB_DUP	1	0	2247	3608	0.794689	inf			0.953256	0.953256
ADAMTS6_DUP	0	1	2248	3607	0.713278	0			0.953256	0.953256
IPO11,LRRC70_DUP	1	0	2247	3608	0.794689	inf			0.953256	0.953256
LRRC15_DEL	1	0	2247	3608	0.794689	inf			0.953256	0.953256
GAPT,PLK2_DUP	1	0	2247	3608	0.794689	inf			0.953256	0.953256
KRBA2,RNF222,RPL26_DUP	1	0	2247	3608	0.794689	inf			0.953256	0.953256
TNK2_DUP	1	0	2247	3608	0.794689	inf			0.953256	0.953256
NPR3_DUP	1	0	2247	3608	0.794689	inf			0.953256	0.953256
SPNS3_DEL	1	0	2247	3608	0.794689	inf			0.953256	0.953256
OR1A1,OR1A2,OR1G1,OR3A1,OR3A2_DUP	0	1	2248	3607	0.713278	0			0.953256	0.953256
ATP2A1,ATXN2L,CD19,LAT,NFATC2IP,RABEP2,SH2B1,SPNS1,TUFM_DEL	1	0	2247	3608	0.794689	inf			0.953256	0.953256
TRIML1,TRIML2_DUP	0	1	2248	3607	0.713278	0			0.953256	0.953256
CYP4V2,F11,FAM149A,KLKB1_DUP	0	1	2248	3607	0.713278	0			0.953256	0.953256
SORBS2_DUP	0	1	2248	3607	0.713278	0			0.953256	0.953256
ANKRD37,C4orf47,CCDC110,LRP2BP,PDLIM3,SNX25,UFSP2_DUP	1	0	2247	3608	0.794689	inf			0.953256	0.953256
AREG,BTC,EPGN,EREG_DUP	0	1	2248	3607	0.713278	0			0.953256	0.953256
FRAS1,MRPL1_DUP	1	0	2247	3608	0.794689	inf			0.953256	0.953256
TLDC1_DEL	1	0	2247	3608	0.794689	inf			0.953256	0.953256
TLL1_DEL	0	1	2248	3607	0.713278	0			0.953256	0.953256
CDYL2_DEL	1	0	2247	3608	0.794689	inf			0.953256	0.953256
SUCLG2_DEL	1	0	2247	3608	0.794689	inf			0.953256	0.953256
GMDS_DEL	0	1	2248	3607	0.713278	0			0.953256	0.953256
GABRB2_DUP	0	1	2248	3607	0.713278	0			0.953256	0.953256
ZNF804A_DEL	1	0	2247	3608	0.794689	inf			0.953256	0.953256
SATB2_DUP	0	1	2248	3607	0.713278	0			0.953256	0.953256
BARD1_DEL	1	0	2247	3608	0.794689	inf			0.953256	0.953256
APBA2,FAM189A1,NDNL2,TJP1_DEL	1	0	2247	3608	0.794689	inf			0.953256	0.953256
FABP7,SMPDL3A_DEL	0	1	2248	3607	0.713278	0			0.953256	0.953256
MC2R,MC5R_DEL	1	0	2247	3608	0.794689	inf			0.953256	0.953256
ANKRD6,GABRR1,GABRR2,PM20D2,RRAGD,UBE2J1_DUP	0	1	2248	3607	0.713278	0			0.953256	0.953256
FHIT_DEL	0	1	2248	3607	0.713278	0			0.953256	0.953256
AFG3L2,CIDEA,SLMO1,TUBB6_DUP	1	0	2247	3608	0.794689	inf			0.953256	0.953256
ADPRHL1,DCUN1D2,TMCO3_DUP	0	1	2248	3607	0.713278	0			0.953256	0.953256
MTERFD2,PASK,PPP1R7_DUP	0	1	2248	3607	0.713278	0			0.953256	0.953256
ABCB5,ITGB8,MACC1_DUP	1	0	2247	3608	0.794689	inf			0.953256	0.953256
CHL1_DEL	0	1	2248	3607	0.713278	0			0.953256	0.953256
ZNF236_DUP	0	1	2248	3607	0.713278	0			0.953256	0.953256
ARHGAP28,LAMA1_DEL	0	1	2248	3607	0.713278	0			0.953256	0.953256
GGTLC1_DEL	1	0	2247	3608	0.794689	inf			0.953256	0.953256
ARHGAP28,LAMA1_DUP	0	1	2248	3607	0.713278	0			0.953256	0.953256
SNRK_DUP	0	1	2248	3607	0.713278	0			0.953256	0.953256
ENOX1_DUP	1	0	2247	3608	0.794689	inf			0.953256	0.953256
OR2B3,OR2J2,OR2J3,OR2W1,ZNF311_DEL	1	0	2247	3608	0.794689	inf			0.953256	0.953289
CACNA1D_DEL	0	1	2248	3607	0.713278	0			0.953256	0.953484
CACNA2D3_DEL	1	0	2247	3608	0.794689	inf			0.953256	0.954121
BCKDHB_DUP	1	0	2247	3608	0.794689	inf			0.953256	0.955856
ACSBG1,CHRNA3,CHRNA5,CHRNB4,CIB2,CRABP1,DNAJA4,HYKK,IDH3A,IREB2,PSMA4,WDR61_DUP	1	0	2247	3608	0.794689	inf			0.953256	0.959121
OR2Y1_DUP	1	3	2247	3605	0.985801	0.363889	0.0184136	7.19116	0.981798	0.964231
PPP2R5E_DUP	2	2	2246	3606	0.958409	1.88003	0.207564	17.0286	0.981798	0.969449
TPO_DUP	1	3	2247	3605	0.985801	0.363889	0.0184136	7.19116	0.981798	0.974563
EHF_DUP	1	3	2247	3605	0.985801	0.363889	0.0184136	7.19116	0.981798	0.978603
KANK1_DUP	2	2	2246	3606	0.958409	1.88003	0.207564	17.0286	0.981798	0.980776
AGPAT4_DUP	3	6	2245	3602	0.983863	0.736864	0.146493	3.70644	0.983507	0.982834
ALG10,SYT10_DUP	2	3	2246	3605	0.805046	0.615544	0.0846079	4.47825	0.983953	0.985153
RAB3C_DUP	1	2	2247	3606	0.798131	0.489551	0.0417312	5.74295	0.990262	0.987448
MICA_DEL	2	1	2246	3607	0.694495	1.96697	0.188736	20.4994	0.990262	0.989776
ANKRD34A,ANKRD35,CD160,HFE2,ITGA10,LIX1L,NUDT17,PEX11B,PIAS3,POLR3C,POLR3GL,RBM8A,RNF115,TXNIP_DEL	2	2	2246	3606	0.657709	1.70274	0.227832	12.7257	0.995202	0.992042
MALL,NPHP1_DUP	2	1	2246	3607	0.46797	1.93667	0.190595	19.6788	0.995806	0.993988
OR1B1,OR1L1,OR1L8,OR1Q1_DEL	2	1	2246	3607	0.46797	1.93667	0.190595	19.6788	0.995806	0.995214
GNB4,MFN1,ZNF639_DUP	1	2	2247	3606	0.91371	0.371237	0.020958	6.57588	0.995806	0.995654
ABCC4_DUP	2	1	2246	3607	0.979575	2.81772	0.141636	56.0558	0.995806	0.995789
GLB1L2,GLB1L3_DEL	1	2	2247	3606	0.546165	0.482812	0.0432926	5.38445	0.995806	0.995805
SEMA5A_DUP	1	2	2247	3606	0.91371	0.371237	0.020958	6.57588	0.995806	0.995806

## Sheet: Table S7
Table S7. Summary statistics from breakpoint-based CNV burden tests.
locus_name	nca_1_tot	nco_1_tot	nca_0_tot	nco_0_tot	breslowday_p	cmh_or	cmh_95ci_l	cmh_95ci_u	cmh_p	cmh_p_expected
8_3927244_4308173_DEL	5	0	2243	3608	0.380655	inf			0.0169458	0.0191058
10_68740304_68922242_DUP	5	1	2243	3607	0.380351	11.8008	1.26813	109.814	0.0262674	0.0314114
7_64743378_65089410_DEL	11	4	2237	3604	0.252615	4.10485	1.22297	13.7778	0.0310604	0.0414765
8_2070794_2174902_DEL	4	1	2244	3607	0.246057	10.7048	1.19507	95.8889	0.0318412	0.0520064
16_88527293_88659990_DUP	4	0	2244	3608	0.468568	inf			0.0578436	0.0624005
20_14765820_15172022_DEL	11	7	2237	3601	0.219577	2.54139	0.975887	6.61826	0.0663755	0.0729931
7_19880689_20559001_DUP	3	0	2245	3608	0.360341	inf			0.0761155	0.082521
4_163934608_164020174_DUP	0	5	2248	3603	0.553126	0			0.0868728	0.0908946
22_18889969_21461607_DUP	5	2	2243	3606	0.687601	5.60265	0.977628	32.1079	0.0956361	0.098457
2_51975932_52570207_DEL	3	0	2245	3608	0.415041	inf			0.0996961	0.105381
9_23941083_24047722_DEL	3	0	2245	3608	0.455404	inf			0.107597	0.111197
15_30958935_32515100_DEL	3	0	2245	3608	0.455404	inf			0.107597	0.116074
21_24331798_24412633_DEL	3	0	2245	3608	0.455404	inf			0.107597	0.120088
16_5950848_6015697_DEL	2	0	2246	3608	0.319298	inf			0.129583	0.123122
7_63308511_64594340_DEL	2	0	2246	3608	0.319298	inf			0.129583	0.125619
7_143572286_143874190_DEL	2	0	2246	3608	0.319298	inf			0.129583	0.127406
21_46844965_46893370_DEL	2	0	2246	3608	0.319298	inf			0.129583	0.129077
3_186415532_186604336_DUP	2	0	2246	3608	0.319298	inf			0.129583	0.130625
2_209810952_210041387_DEL	2	0	2246	3608	0.319298	inf			0.129583	0.1321
10_54320516_56771835_DEL	2	0	2246	3608	0.319298	inf			0.129583	0.134374
21_37477099_37610558_DUP	8	6	2240	3602	0.167207	2.4962	0.846255	7.36302	0.131642	0.136994
6_61970201_62110461_DUP	0	3	2248	3605	0.444071	0			0.133632	0.139883
9_4163607_4547288_DUP	1	9	2247	3599	0.808974	0.102877	0.0077732	1.36157	0.140285	0.143803
18_62115075_62264706_DUP	1	5	2247	3603	0.520648	0.171815	0.0205649	1.43547	0.145662	0.148081
15_30958935_32515100_DUP	7	3	2241	3605	0.895838	4.13146	0.882948	19.3318	0.148495	0.152947
8_4449278_6521838_DEL	9	6	2239	3602	0.905423	2.61315	0.851733	8.01728	0.160825	0.1585
3_25927564_26292244_DEL	3	0	2245	3608	0.518597	inf			0.161228	0.164271
4_4923296_5118123_DUP	3	0	2245	3608	0.518597	inf			0.161228	0.170308
4_12375400_12674326_DUP	4	0	2244	3608	0.8171	inf			0.164348	0.176682
5_115229141_115428381_DUP	1	8	2247	3600	0.637786	0.232441	0.033042	1.63515	0.168179	0.182824
18_64094509_64328016_DEL	1	8	2247	3600	0.513453	0.23876	0.0340921	1.67213	0.176905	0.189004
3_5082955_5147044_DEL	4	1	2244	3607	0.730601	7.9381	0.685382	91.9391	0.18398	0.194777
22_25809940_25995783_DUP	2	9	2246	3599	0.409003	0.261068	0.0484528	1.40666	0.195036	0.200751
8_87194112_87330713_DUP	0	5	2248	3603	0.759268	0			0.196358	0.20585
7_63308511_64594340_DUP	0	3	2248	3605	0.656689	0			0.215207	0.21103
2_184862190_186126394_DEL	3	0	2245	3608	0.731592	inf			0.219123	0.216116
19_7098967_7103316_DUP	2	0	2246	3608	0.488164	inf			0.231842	0.221283
17_14096504_15457054_DEL	5	3	2243	3605	0.639509	3.50876	0.729215	16.8831	0.239883	0.225679
2_45408893_45858240_DUP	3	0	2245	3608	0.672775	inf			0.241024	0.230419
11_100402260_100513913_DEL	3	0	2245	3608	0.672775	inf			0.241024	0.235491
9_11504455_12286336_DEL	13	31	2235	3577	0.232043	0.636049	0.320917	1.26063	0.25145	0.239884
2_34198138_34259736_DUP	4	2	2244	3606	0.806943	4.26215	0.677848	26.7994	0.253246	0.244502
5_113603570_113662439_DEL	3	2	2245	3606	0.506146	4.00888	0.668889	24.0265	0.253578	0.248963
15_57644267_57777946_DUP	2	8	2246	3600	0.526737	0.375831	0.0849922	1.66191	0.270992	0.253597
8_137727375_137855721_DEL	3	1	2245	3607	0.682995	6.43569	0.570085	72.6524	0.274584	0.257706
9_122535333_122614778_DEL	0	2	2248	3606	0.485179	0			0.279846	0.261869
6_168347396_168597599_DUP	23	22	2225	3586	0.88717	1.48782	0.792774	2.79224	0.283551	0.266141
4_151679315_151998622_DUP	1	6	2247	3602	0.432103	0.291134	0.0413508	2.04976	0.285241	0.270034
10_6677767_6894846_DUP	3	1	2245	3607	0.690789	6.48458	0.545076	77.1448	0.292153	0.274018
2_44335986_44412864_DUP	3	1	2245	3607	0.186597	3.82343	0.49641	29.4487	0.292153	0.277886
5_147357920_147480692_DEL	3	0	2245	3608	0.738563	inf			0.294539	0.281742
9_139962260_139962260_DEL	2	0	2246	3608	0.549174	inf			0.29674	0.285138
20_41604393_41745159_DEL	2	0	2246	3608	0.549174	inf			0.29674	0.288868
1_145801230_145801230_DEL	2	0	2246	3608	0.549174	inf			0.29674	0.292154
1_76645080_77048617_DEL	2	0	2246	3608	0.549174	inf			0.29674	0.295518
13_90431523_90885583_DEL	2	0	2246	3608	0.549174	inf			0.29674	0.298623
18_29736722_29806853_DEL	2	0	2246	3608	0.549174	inf			0.29674	0.301894
1_5307076_5358282_DUP	0	6	2248	3602	0.883394	0			0.297242	0.305203
7_32216291_32420648_DUP	1	8	2247	3600	0.807209	0.136458	0.00887955	2.09705	0.301283	0.308747
15_82014373_82087604_DUP	0	5	2248	3603	0.984396	0			0.315861	0.312256
5_75255293_75434086_DUP	0	3	2248	3605	0.752646	0			0.319061	0.315857
16_77169104_78763794_DUP	0	3	2248	3605	0.728078	0			0.336663	0.319113
9_75633973_75978400_DUP	0	3	2248	3605	0.728078	0			0.336663	0.322681
9_18343434_18674221_DUP	0	3	2248	3605	0.728078	0			0.336663	0.32626
9_104449098_104930935_DUP	0	3	2248	3605	0.728078	0			0.336663	0.329825
19_6896380_7090222_DUP	17	21	2231	3587	0.0582416	1.43983	0.747974	2.77165	0.338772	0.333267
7_64743378_65089410_DUP	3	8	2245	3600	0.293006	0.471477	0.128508	1.72979	0.341877	0.337134
4_137797233_138269679_DEL	0	4	2248	3604	0.930366	0			0.356261	0.34095
2_51735134_51953396_DEL	2	0	2246	3608	0.573004	inf			0.361738	0.344438
11_21753111_21968847_DUP	2	0	2246	3608	0.573004	inf			0.361738	0.348038
5_178415937_178727670_DUP	2	0	2246	3608	0.573004	inf			0.361738	0.35148
14_27889567_28080806_DEL	2	1	2246	3607	0.5172	5.34187	0.483858	58.9751	0.376631	0.354674
3_8070268_8382513_DUP	2	1	2246	3607	0.5172	5.34187	0.483858	58.9751	0.376631	0.357837
14_40938636_41207853_DEL	2	1	2246	3607	0.5172	5.34187	0.483858	58.9751	0.376631	0.360921
8_2290945_2584448_DEL	2	1	2246	3607	0.5172	5.34187	0.483858	58.9751	0.376631	0.363904
17_75048672_75095164_DUP	2	1	2246	3607	0.5172	5.34187	0.483858	58.9751	0.376631	0.366847
7_109931329_110125420_DEL	2	1	2246	3607	0.5172	5.34187	0.483858	58.9751	0.376631	0.370116
2_203553836_204242614_DUP	2	1	2246	3607	0.5172	5.34187	0.483858	58.9751	0.376631	0.373064
14_89171711_89466283_DUP	0	3	2248	3605	0.908719	0			0.378519	0.376097
4_111081706_111168732_DUP	0	3	2248	3605	0.908719	0			0.378519	0.379154
9_138156321_138305834_DUP	10	11	2238	3597	0.127008	1.57819	0.665995	3.73981	0.38381	0.3819
20_12823007_12888320_DUP	0	5	2248	3603	0.91213	0			0.385562	0.384689
2_51304238_51357902_DEL	4	3	2244	3605	0.87182	2.84078	0.561175	14.3806	0.404002	0.387166
4_8611424_8677287_DEL	2	0	2246	3608	0.670809	inf			0.410797	0.389856
5_106609174_106679208_DEL	2	0	2246	3608	0.670809	inf			0.410797	0.392354
7_29209361_29535998_DUP	2	0	2246	3608	0.670809	inf			0.410797	0.39457
16_21625020_21742542_DUP	2	0	2246	3608	0.670809	inf			0.410797	0.396806
4_5573669_5651017_DEL	2	0	2246	3608	0.670809	inf			0.410797	0.399276
7_17396017_17520523_DUP	0	4	2248	3604	0.986472	0			0.413697	0.401883
3_108606666_109006139_DUP	0	4	2248	3604	0.986472	0			0.413697	0.404362
22_25809940_25995783_DEL	5	3	2243	3605	0.963024	2.87313	0.551655	14.9638	0.418077	0.406749
3_178921838_179045967_DUP	2	8	2246	3600	0.841772	0.379981	0.0701714	2.05761	0.418711	0.409149
2_241623458_241960778_DUP	4	2	2244	3606	0.916636	3.60778	0.511028	25.4704	0.419467	0.411453
2_82207498_82315179_DUP	3	3	2245	3605	0.631441	2.6716	0.538346	13.2581	0.428245	0.414161
2_53199884_53507910_DEL	0	2	2248	3606	0.579571	0			0.428515	0.416245
7_157734314_157803711_DUP	2	10	2246	3598	0.720855	0.459937	0.104768	2.01916	0.436279	0.4183
2_54353344_54427305_DEL	2	0	2246	3608	0.723648	inf			0.442671	0.420547
18_68749559_73955305_DEL	2	0	2246	3608	0.723648	inf			0.442671	0.42261
2_234553314_234639656_DEL	1	4	2247	3604	0.609706	0.294769	0.0345732	2.51318	0.442721	0.424892
4_131956770_132351655_DUP	5	5	2243	3603	0.95717	2.16699	0.569992	8.23842	0.446998	0.42728
6_161607130_161807897_DUP	4	9	2244	3599	0.583315	0.478881	0.125129	1.83272	0.451171	0.429356
4_186744619_188448849_DUP	4	3	2244	3605	0.442244	2.30913	0.509341	10.4686	0.452227	0.431466
10_96405329_96519061_DEL	4	3	2244	3605	0.442244	2.30913	0.509341	10.4686	0.452227	0.433298
4_35873502_36060986_DUP	1	1	2247	3607	0.991123	1.09167	0.0277748	42.9071	0.45678	0.435208
2_15253215_15833964_DUP	1	1	2247	3607	0.991123	1.09167	0.0277748	42.9071	0.45678	0.437026
4_183791706_184174980_DUP	1	1	2247	3607	0.991123	1.09167	0.0277748	42.9071	0.45678	0.438856
5_99436735_99656681_DEL	1	1	2247	3607	0.991123	1.09167	0.0277748	42.9071	0.45678	0.440764
4_160708061_162116243_DEL	1	1	2247	3607	0.991123	1.09167	0.0277748	42.9071	0.45678	0.442612
9_10487130_10564866_DEL	0	2	2248	3606	0.662331	0			0.45678	0.444184
12_125146549_125440950_DUP	0	2	2248	3606	0.662331	0			0.45678	0.445647
9_10172120_10346862_DEL	1	1	2247	3607	0.991123	1.09167	0.0277748	42.9071	0.45678	0.447003
6_2838046_3078266_DUP	1	1	2247	3607	0.991123	1.09167	0.0277748	42.9071	0.45678	0.448281
2_128960351_129455368_DUP	1	1	2247	3607	0.229253	1.0356	0.101962	10.5183	0.45678	0.449411
8_14543582_16842762_DUP	1	1	2247	3607	0.991123	1.09167	0.0277748	42.9071	0.45678	0.450427
1_72442018_72589410_DEL	1	1	2247	3607	0.991123	1.09167	0.0277748	42.9071	0.45678	0.451366
22_23983234_25010855_DUP	0	2	2248	3606	0.662331	0			0.45678	0.452257
9_28189782_28337697_DEL	1	1	2247	3607	0.991123	1.09167	0.0277748	42.9071	0.45678	0.45305
9_104449098_104930935_DEL	0	2	2248	3606	0.662331	0			0.45678	0.453822
16_7896743_8391583_DEL	1	1	2247	3607	0.991123	1.09167	0.0277748	42.9071	0.45678	0.454418
14_63010448_63098684_DUP	1	1	2247	3607	0.991123	1.09167	0.0277748	42.9071	0.45678	0.454812
16_46501717_46741887_DUP	1	1	2247	3607	0.991123	1.09167	0.0277748	42.9071	0.45678	0.455122
4_80636897_80857151_DEL	1	1	2247	3607	0.991123	1.09167	0.0277748	42.9071	0.45678	0.455519
3_35825701_35938795_DUP	0	2	2248	3606	0.662331	0			0.45678	0.455731
5_81914579_82086511_DUP	0	2	2248	3606	0.662331	0			0.45678	0.45605
3_44986836_45333985_DUP	1	1	2247	3607	0.991123	1.09167	0.0277748	42.9071	0.45678	0.456217
2_212350088_212412272_DEL	1	1	2247	3607	0.991123	1.09167	0.0277748	42.9071	0.45678	0.456393
15_23660570_28540261_DUP	1	1	2247	3607	0.229253	1.0356	0.101962	10.5183	0.45678	0.45656
16_75931234_76043514_DEL	1	1	2247	3607	0.991123	1.09167	0.0277748	42.9071	0.45678	0.456687
2_167298015_167417575_DEL	1	1	2247	3607	0.991123	1.09167	0.0277748	42.9071	0.45678	0.45679
5_120942971_121030389_DUP	0	2	2248	3606	0.662331	0			0.45678	0.456867
14_96649263_96787771_DUP	1	1	2247	3607	0.991123	1.09167	0.0277748	42.9071	0.45678	0.45693
1_102651012_102862866_DEL	0	2	2248	3606	0.662331	0			0.45678	0.457011
8_57982359_58353280_DUP	1	1	2247	3607	0.991123	1.09167	0.0277748	42.9071	0.45678	0.457159
8_125108977_129568078_DUP	1	1	2247	3607	0.229253	1.0356	0.101962	10.5183	0.45678	0.457248
3_152333054_153407913_DUP	1	1	2247	3607	0.991123	1.09167	0.0277748	42.9071	0.45678	0.45742
2_227824059_228071881_DUP	1	1	2247	3607	0.991123	1.09167	0.0277748	42.9071	0.45678	0.457654
1_2735418_2917377_DUP	0	2	2248	3606	0.662331	0			0.45678	0.457919
7_33774440_34468378_DEL	1	1	2247	3607	0.991123	1.09167	0.0277748	42.9071	0.45678	0.45821
20_9737189_9976721_DUP	0	2	2248	3606	0.662331	0			0.45678	0.458541
20_7564924_7666940_DEL	0	2	2248	3606	0.662331	0			0.45678	0.459002
8_1328742_1374675_DEL	1	1	2247	3607	0.991123	1.09167	0.0277748	42.9071	0.45678	0.459555
17_18789653_18927996_DUP	1	1	2247	3607	0.229253	1.0356	0.101962	10.5183	0.45678	0.460205
4_11680958_12361202_DEL	0	2	2248	3606	0.662331	0			0.45678	0.460936
11_62712229_62931547_DEL	1	1	2247	3607	0.991123	1.09167	0.0277748	42.9071	0.45678	0.461838
9_110704087_110761427_DEL	1	1	2247	3607	0.991123	1.09167	0.0277748	42.9071	0.45678	0.462996
12_20097565_20146185_DEL	1	1	2247	3607	0.991123	1.09167	0.0277748	42.9071	0.45678	0.464167
5_8556558_8697444_DUP	1	1	2247	3607	0.991123	1.09167	0.0277748	42.9071	0.45678	0.465404
7_152567213_152770512_DUP	1	1	2247	3607	0.991123	1.09167	0.0277748	42.9071	0.45678	0.466997
6_161602523_161602523_DUP	1	1	2247	3607	0.991123	1.09167	0.0277748	42.9071	0.45678	0.468715
9_119058748_120243337_DUP	1	1	2247	3607	0.991123	1.09167	0.0277748	42.9071	0.45678	0.47048
16_6924915_7745364_DEL	6	4	2242	3604	0.967423	2.42781	0.547418	10.7674	0.458322	0.472432
3_66206_2970932_DUP	14	14	2234	3594	0.89183	1.46275	0.657111	3.25613	0.471219	0.474413
11_96162383_100342880_DEL	0	3	2248	3605	0.915727	0			0.474488	0.476453
22_23921427_23979219_DEL	0	3	2248	3605	0.915727	0			0.474488	0.478717
3_66206_2970932_DEL	3	12	2245	3596	0.747387	0.552374	0.161294	1.89168	0.474584	0.480923
18_351378_2679139_DUP	3	2	2245	3606	0.833657	3.21686	0.470319	22.0025	0.480082	0.483306
11_96162383_100342880_DUP	3	2	2245	3606	0.110761	2.23878	0.433653	11.558	0.480082	0.48581
16_75266607_75322489_DUP	0	4	2248	3604	0.935013	0			0.506901	0.488292
11_4386751_4869649_DUP	0	4	2248	3604	0.935013	0			0.506901	0.490721
7_157731086_157731086_DUP	0	4	2248	3604	0.935013	0			0.506901	0.493301
13_70962112_71024996_DEL	0	4	2248	3604	0.935013	0			0.506901	0.495772
15_85825567_86134332_DUP	3	1	2245	3607	0.661724	5.17815	0.350145	76.5777	0.510378	0.49834
15_86532353_86866875_DUP	0	2	2248	3606	0.730611	0			0.512763	0.501167
12_675339_1072390_DUP	1	1	2247	3607	0.743428	1.0923	0.0589525	20.2388	0.512763	0.503938
2_18920739_19025460_DUP	1	1	2247	3607	0.743428	1.0923	0.0589525	20.2388	0.512763	0.506568
10_45329761_45353080_DUP	1	1	2247	3607	0.743428	1.0923	0.0589525	20.2388	0.512763	0.508998
2_40493846_40642423_DEL	2	1	2246	3607	0.659098	4.75683	0.380301	59.4988	0.513402	0.511433
4_9889924_10857992_DUP	2	1	2246	3607	0.659098	4.75683	0.380301	59.4988	0.513402	0.51371
17_991065_1145495_DUP	1	5	2247	3603	0.989321	0.195632	0.0124003	3.08639	0.516691	0.516157
2_1119669_1843343_DUP	2	9	2246	3599	0.943189	0.417019	0.0733823	2.36985	0.52971	0.518787
3_85110559_85407057_DEL	1	1	2247	3607	0.811982	0.889163	0.0554149	14.2671	0.531427	0.521322
3_109940576_110614179_DUP	2	0	2246	3608	0.717071	inf			0.531427	0.523745
7_119536966_119631886_DEL	2	0	2246	3608	0.717071	inf			0.531427	0.525849
8_13856147_13928981_DEL	2	0	2246	3608	0.717071	inf			0.531427	0.52832
4_109476983_109833983_DUP	1	1	2247	3607	0.811982	0.889163	0.0554149	14.2671	0.531427	0.530705
2_111399346_113103748_DUP	2	0	2246	3608	0.717071	inf			0.531427	0.533449
7_154666155_154904966_DUP	1	1	2247	3607	0.811982	0.889163	0.0554149	14.2671	0.531427	0.536147
4_81488421_81802673_DUP	1	1	2247	3607	0.811982	0.889163	0.0554149	14.2671	0.531427	0.53873
13_81909589_82105165_DEL	4	3	2244	3605	0.958408	2.50852	0.467406	13.463	0.53746	0.54128
9_28595171_28763061_DEL	1	5	2247	3603	0.819918	0.280185	0.0264924	2.96325	0.538994	0.543916
5_99319915_99391265_DEL	3	1	2245	3607	0.919082	4.85379	0.342142	68.8581	0.542192	0.546512
11_35539269_35580703_DEL	3	1	2245	3607	0.205021	2.49757	0.345395	18.0601	0.542192	0.549423
5_101012153_101287159_DEL	0	3	2248	3605	0.977445	0			0.55206	0.55225
4_131528544_131633658_DEL	0	3	2248	3605	0.977445	0			0.55206	0.555207
19_45837283_45899087_DUP	1	2	2247	3606	0.781507	1.04324	0.0761122	14.2992	0.55206	0.557883
8_13510293_13738853_DEL	1	4	2247	3604	0.93849	0.292337	0.0287481	2.97276	0.553491	0.560561
7_8187264_9223112_DEL	2	7	2246	3601	0.969407	0.440754	0.0789969	2.45914	0.561386	0.56324
5_104053379_104524071_DEL	2	8	2246	3600	0.484963	0.496049	0.104686	2.35051	0.568057	0.565925
6_161817691_163233409_DUP	7	9	2241	3599	0.996786	1.62201	0.551908	4.76694	0.570486	0.568423
15_22759530_23279684_DEL	8	10	2240	3598	0.987113	1.56901	0.557159	4.41847	0.583722	0.570918
21_33420705_33469682_DUP	3	3	2245	3605	0.786842	2.35579	0.439306	12.633	0.585591	0.573344
12_7989403_8123777_DEL	2	0	2246	3608	0.862356	inf			0.586348	0.576008
14_54001205_54439630_DUP	1	1	2247	3607	0.368645	0.81028	0.0695919	9.43435	0.586348	0.578418
8_111910462_112181765_DEL	2	0	2246	3608	0.862356	inf			0.586348	0.580573
2_61933897_62422996_DUP	2	0	2246	3608	0.862356	inf			0.586348	0.582731
9_122623813_122814965_DEL	1	4	2247	3604	0.474518	0.409095	0.0547115	3.05893	0.592157	0.584585
13_43544964_43732555_DUP	1	4	2247	3604	0.592089	0.309606	0.0306836	3.124	0.592157	0.586442
17_13177679_13234204_DUP	1	4	2247	3604	0.474518	0.409095	0.0547115	3.05893	0.592157	0.588165
9_12305664_12674124_DEL	3	2	2245	3606	0.893952	2.92429	0.396578	21.5632	0.59223	0.589979
7_8187264_9223112_DUP	4	3	2244	3605	0.797928	2.07084	0.43212	9.92401	0.596509	0.591556
7_135904371_135981478_DUP	1	2	2247	3606	0.880664	0.863026	0.0536927	13.8718	0.596636	0.592907
8_25530507_25587782_DEL	2	1	2246	3607	0.737504	4.39606	0.328778	58.7793	0.596636	0.594312
19_20822671_20826692_DUP	1	2	2247	3606	0.588536	0.906808	0.0946227	8.69032	0.596636	0.595566
13_69514967_69590780_DEL	2	1	2246	3607	0.197849	2.74827	0.329893	22.8953	0.596636	0.596848
4_148665437_148847584_DEL	2	1	2246	3607	0.737504	4.39606	0.328778	58.7793	0.596636	0.597935
15_93798732_95402285_DUP	2	1	2246	3607	0.737504	4.39606	0.328778	58.7793	0.596636	0.599038
3_195477791_195661523_DUP	2	1	2246	3607	0.737504	4.39606	0.328778	58.7793	0.596636	0.600017
5_5658833_6016507_DUP	1	2	2247	3606	0.588536	0.906808	0.0946227	8.69032	0.596636	0.601011
9_18882338_19640344_DUP	1	2	2247	3606	0.880664	0.863026	0.0536927	13.8718	0.596636	0.601909
8_1786342_1836047_DEL	2	1	2246	3607	0.737504	4.39606	0.328778	58.7793	0.596636	0.602748
16_4877593_5121170_DEL	2	1	2246	3607	0.197849	2.74827	0.329893	22.8953	0.596636	0.603403
10_51912644_52005293_DUP	1	2	2247	3606	0.588536	0.906808	0.0946227	8.69032	0.596636	0.604053
4_74776218_75747581_DUP	1	3	2247	3605	0.761427	0.314848	0.0314819	3.14876	0.602253	0.604765
5_9091308_9629295_DEL	0	2	2248	3606	0.722843	0			0.604925	0.605329
3_108036010_108583220_DUP	0	2	2248	3606	0.722843	0			0.604925	0.605812
5_100046135_100990247_DEL	1	1	2247	3607	0.811246	1.32195	0.0821976	21.2604	0.604925	0.606348
2_231183786_231258450_DEL	0	2	2248	3606	0.722843	0			0.604925	0.606769
8_123515720_123564173_DEL	2	8	2246	3600	0.944335	0.490658	0.096678	2.49017	0.607844	0.607193
5_120311620_120415134_DUP	1	0	2247	3608	0.518619	inf			0.609834	0.607521
5_109484586_109634255_DUP	0	1	2248	3607	0.925109	0			0.609834	0.607937
19_43768112_44082945_DUP	0	1	2248	3607	0.925109	0			0.609834	0.608233
5_81842729_81898168_DUP	0	1	2248	3607	0.925109	0			0.609834	0.608381
5_101850871_102041715_DEL	0	1	2248	3607	0.925109	0			0.609834	0.608638
5_120175344_120178687_DEL	0	1	2248	3607	0.925109	0			0.609834	0.608824
5_96506959_97051856_DEL	1	0	2247	3608	0.518619	inf			0.609834	0.609012
2_16434240_16498117_DEL	1	0	2247	3608	0.518619	inf			0.609834	0.609176
2_4971943_5221629_DEL	0	1	2248	3607	0.925109	0			0.609834	0.609296
5_63882186_64027291_DUP	0	1	2248	3607	0.925109	0			0.609834	0.60941
2_15253215_15833964_DEL	0	1	2248	3607	0.925109	0			0.609834	0.609489
2_5469833_5755801_DUP	1	0	2247	3608	0.518619	inf			0.609834	0.609563
9_139926023_139926023_DEL	1	0	2247	3608	0.518619	inf			0.609834	0.609626
5_58775150_58867697_DEL	1	0	2247	3608	0.518619	inf			0.609834	0.609678
5_104542273_105786813_DUP	0	1	2248	3607	0.925109	0			0.609834	0.609703
5_56947141_57340756_DUP	0	1	2248	3607	0.925109	0			0.609834	0.609737
2_851144_1101127_DEL	1	0	2247	3608	0.518619	inf			0.609834	0.609784
5_119984201_120084554_DEL	0	1	2248	3607	0.925109	0			0.609834	0.609794
2_32784311_33331219_DUP	1	0	2247	3608	0.518619	inf			0.609834	0.609805
2_22079770_22756232_DEL	0	1	2248	3607	0.925109	0			0.609834	0.609815
19_55481398_55625764_DEL	0	1	2248	3607	0.925109	0			0.609834	0.609818
19_54992832_55180067_DEL	0	1	2248	3607	0.925109	0			0.609834	0.609822
5_97537837_97976786_DEL	1	0	2247	3608	0.518619	inf			0.609834	0.609825
2_14317807_14603874_DEL	0	1	2248	3607	0.925109	0			0.609834	0.609829
5_99235642_99302479_DEL	0	1	2248	3607	0.925109	0			0.609834	0.60983
1_25695835_25758419_DUP	0	1	2248	3607	0.925109	0			0.609834	0.609834
5_96104835_96150836_DUP	0	1	2248	3607	0.925109	0			0.609834	0.609834
2_36881178_37052585_DUP	1	0	2247	3608	0.518619	inf			0.609834	0.609834
1_31062580_31107431_DEL	0	1	2248	3607	0.925109	0			0.609834	0.609834
2_36881178_37052585_DEL	1	0	2247	3608	0.518619	inf			0.609834	0.609834
5_118951870_119064355_DEL	0	1	2248	3607	0.925109	0			0.609834	0.609834
5_89777146_90007196_DEL	1	0	2247	3608	0.518619	inf			0.609834	0.609834
5_119302786_119398841_DUP	0	1	2248	3607	0.925109	0			0.609834	0.609834
9_139925995_139925995_DEL	1	0	2247	3608	0.518619	inf			0.609834	0.609834
2_38420561_38571255_DEL	1	0	2247	3608	0.518619	inf			0.609834	0.609834
5_85042123_86151620_DUP	1	0	2247	3608	0.518619	inf			0.609834	0.609834
2_837567_838796_DUP	0	1	2248	3607	0.925109	0			0.609834	0.609834
5_109876372_110021869_DEL	1	0	2247	3608	0.518619	inf			0.609834	0.609834
9_139925391_139925391_DEL	1	0	2247	3608	0.518619	inf			0.609834	0.609834
5_179706870_180111144_DUP	0	1	2248	3607	0.925109	0			0.609834	0.609834
19_41456390_41515483_DEL	0	1	2248	3607	0.925109	0			0.609834	0.609834
17_33501285_33577065_DEL	0	1	2248	3607	0.925109	0			0.609834	0.609834
6_101365551_101574674_DEL	0	1	2248	3607	0.925109	0			0.609834	0.609834
17_48509965_48643680_DUP	0	1	2248	3607	0.925109	0			0.609834	0.609834
17_48893818_49024867_DUP	1	0	2247	3608	0.518619	inf			0.609834	0.609834
17_49452209_49493090_DUP	1	0	2247	3608	0.518619	inf			0.609834	0.609834
6_97707240_97816312_DEL	0	1	2248	3607	0.925109	0			0.609834	0.609834
6_95836160_97021093_DEL	1	0	2247	3608	0.518619	inf			0.609834	0.609834
6_90429295_90561612_DEL	1	0	2247	3608	0.518619	inf			0.609834	0.609834
6_89247056_89615293_DUP	0	1	2248	3607	0.925109	0			0.609834	0.609834
17_70957223_71056033_DEL	0	1	2248	3607	0.925109	0			0.609834	0.609834
17_29115920_29333516_DEL	0	1	2248	3607	0.925109	0			0.609834	0.609834
6_88181501_88383623_DUP	0	1	2248	3607	0.925109	0			0.609834	0.609834
17_72883035_72955523_DEL	0	1	2248	3607	0.925109	0			0.609834	0.609834
6_84425863_84695944_DUP	0	1	2248	3607	0.925109	0			0.609834	0.609834
17_74610113_74653862_DUP	0	1	2248	3607	0.925109	0			0.609834	0.609834
17_75043943_75043943_DUP	0	1	2248	3607	0.925109	0			0.609834	0.609834
6_80985539_81515701_DEL	0	1	2248	3607	0.925109	0			0.609834	0.609834
17_77188549_77234671_DUP	0	1	2248	3607	0.925109	0			0.609834	0.609834
17_77235561_77291311_DUP	0	1	2248	3607	0.925109	0			0.609834	0.609834
6_78342050_78960614_DUP	0	1	2248	3607	0.925109	0			0.609834	0.609834
18_3768254_3864912_DEL	1	0	2247	3608	0.518619	inf			0.609834	0.609834
6_64753678_64970403_DEL	1	0	2247	3608	0.518619	inf			0.609834	0.609834
6_84943627_85555632_DUP	0	1	2248	3607	0.925109	0			0.609834	0.609834
9_139925946_139925946_DEL	1	0	2247	3608	0.518619	inf			0.609834	0.609834
17_20791169_22024892_DEL	1	0	2247	3608	0.518619	inf			0.609834	0.609834
17_15655798_16509917_DUP	1	0	2247	3608	0.518619	inf			0.609834	0.609834
9_139925790_139925790_DEL	1	0	2247	3608	0.518619	inf			0.609834	0.609834
16_89189129_89253934_DUP	0	1	2248	3607	0.925109	0			0.609834	0.609834
16_89688617_89836323_DUP	0	1	2248	3607	0.925109	0			0.609834	0.609834
6_126352051_126490939_DUP	0	1	2248	3607	0.925109	0			0.609834	0.609834
17_284614_831667_DEL	1	0	2247	3608	0.518619	inf			0.609834	0.609834
17_2202323_2242417_DUP	0	1	2248	3607	0.925109	0			0.609834	0.609834
17_2414208_2565540_DUP	0	1	2248	3607	0.925109	0			0.609834	0.609834
17_2775742_2827379_DUP	0	1	2248	3607	0.925109	0			0.609834	0.609834
17_3261291_3356664_DEL	1	0	2247	3608	0.518619	inf			0.609834	0.609834
17_3844586_3952845_DUP	1	0	2247	3608	0.518619	inf			0.609834	0.609834
17_19424088_19584971_DEL	0	1	2248	3607	0.925109	0			0.609834	0.609834
6_114437276_114611601_DUP	1	0	2247	3608	0.518619	inf			0.609834	0.609834
17_5381867_5415684_DUP	0	1	2248	3607	0.925109	0			0.609834	0.609834
6_113703164_113801238_DUP	1	0	2247	3608	0.518619	inf			0.609834	0.609834
6_112621834_113544965_DUP	0	1	2248	3607	0.925109	0			0.609834	0.609834
6_111394421_111598246_DEL	0	1	2248	3607	0.925109	0			0.609834	0.609834
6_111336435_111381468_DUP	0	1	2248	3607	0.925109	0			0.609834	0.609834
6_110563183_110920540_DUP	0	1	2248	3607	0.925109	0			0.609834	0.609834
17_10002773_10415269_DUP	0	1	2248	3607	0.925109	0			0.609834	0.609834
17_13748171_14073871_DUP	0	1	2248	3607	0.925109	0			0.609834	0.609834
1_46815836_46954263_DUP	0	1	2248	3607	0.925109	0			0.609834	0.609834
17_14096504_15457054_DUP	0	1	2248	3607	0.925109	0			0.609834	0.609834
17_4463023_4541042_DUP	1	0	2247	3608	0.518619	inf			0.609834	0.609834
19_43768112_44082945_DEL	0	1	2248	3607	0.925109	0			0.609834	0.609834
6_55087158_55825851_DEL	0	1	2248	3607	0.925109	0			0.609834	0.609834
18_8606605_8690365_DUP	0	1	2248	3607	0.925109	0			0.609834	0.609834
5_171597125_171656863_DUP	0	1	2248	3607	0.925109	0			0.609834	0.609834
5_171238693_171406077_DUP	1	0	2247	3608	0.518619	inf			0.609834	0.609834
5_169869333_170059227_DUP	0	1	2248	3607	0.925109	0			0.609834	0.609834
5_169571480_169644032_DUP	0	1	2248	3607	0.925109	0			0.609834	0.609834
5_157114139_157201700_DUP	0	1	2248	3607	0.925109	0			0.609834	0.609834
5_150159415_150307422_DEL	0	1	2248	3607	0.925109	0			0.609834	0.609834
19_5285570_5519444_DUP	0	1	2248	3607	0.925109	0			0.609834	0.609834
5_132605601_132696831_DEL	0	1	2248	3607	0.925109	0			0.609834	0.609834
1_31161483_31211282_DUP	1	0	2247	3608	0.518619	inf			0.609834	0.609834
5_131699867_131752090_DUP	1	0	2247	3608	0.518619	inf			0.609834	0.609834
5_175556343_175559948_DEL	0	1	2248	3607	0.925109	0			0.609834	0.609834
19_8063275_8261390_DUP	1	0	2247	3608	0.518619	inf			0.609834	0.609834
19_8398975_8476807_DEL	1	0	2247	3608	0.518619	inf			0.609834	0.609834
19_9083457_9141939_DUP	0	1	2248	3607	0.925109	0			0.609834	0.609834
19_17864452_17954595_DEL	0	1	2248	3607	0.925109	0			0.609834	0.609834
5_126085712_126267351_DUP	0	1	2248	3607	0.925109	0			0.609834	0.609834
5_124204071_124290967_DUP	1	0	2247	3608	0.518619	inf			0.609834	0.609834
19_20722817_20797644_DUP	1	0	2247	3608	0.518619	inf			0.609834	0.609834
19_23032300_23677401_DUP	0	1	2248	3607	0.925109	0			0.609834	0.609834
19_28369147_28444957_DEL	0	1	2248	3607	0.925109	0			0.609834	0.609834
19_33630693_33765136_DUP	0	1	2248	3607	0.925109	0			0.609834	0.609834
19_36524282_36674305_DEL	1	0	2247	3608	0.518619	inf			0.609834	0.609834
19_8063275_8261390_DEL	0	1	2248	3607	0.925109	0			0.609834	0.609834
18_8380800_8559836_DUP	0	1	2248	3607	0.925109	0			0.609834	0.609834
5_180218820_180567719_DUP	0	1	2248	3607	0.925109	0			0.609834	0.609834
6_464426_625268_DUP	0	1	2248	3607	0.925109	0			0.609834	0.609834
18_9745927_9791999_DUP	0	1	2248	3607	0.925109	0			0.609834	0.609834
18_11817585_11914251_DUP	0	1	2248	3607	0.925109	0			0.609834	0.609834
6_51373205_51546212_DUP	0	1	2248	3607	0.925109	0			0.609834	0.609834
18_13541605_13919154_DUP	1	0	2247	3608	0.518619	inf			0.609834	0.609834
6_32963784_33121678_DEL	1	0	2247	3608	0.518619	inf			0.609834	0.609834
6_31455653_31457633_DUP	0	1	2248	3607	0.925109	0			0.609834	0.609834
6_27057497_27326792_DUP	0	1	2248	3607	0.925109	0			0.609834	0.609834
18_39381834_39425041_DEL	0	1	2248	3607	0.925109	0			0.609834	0.609834
18_40992698_41096708_DUP	1	0	2247	3608	0.518619	inf			0.609834	0.609834
6_21921026_22664716_DEL	0	1	2248	3607	0.925109	0			0.609834	0.609834
18_64344156_65253832_DUP	1	0	2247	3608	0.518619	inf			0.609834	0.609834
18_44391197_44541614_DEL	1	0	2247	3608	0.518619	inf			0.609834	0.609834
18_46141229_46298896_DEL	0	1	2248	3607	0.925109	0			0.609834	0.609834
18_48951046_49051558_DUP	0	1	2248	3607	0.925109	0			0.609834	0.609834
6_20766103_20933677_DEL	0	1	2248	3607	0.925109	0			0.609834	0.609834
18_53692616_54243554_DUP	0	1	2248	3607	0.925109	0			0.609834	0.609834
18_56419325_56472758_DUP	0	1	2248	3607	0.925109	0			0.609834	0.609834
6_13732267_13837671_DEL	0	1	2248	3607	0.925109	0			0.609834	0.609834
18_58839828_58947144_DEL	0	1	2248	3607	0.925109	0			0.609834	0.609834
9_139925983_139925983_DEL	1	0	2247	3608	0.518619	inf			0.609834	0.609834
18_63294237_64079691_DUP	1	0	2247	3608	0.518619	inf			0.609834	0.609834
1_37394174_37432463_DEL	0	1	2248	3607	0.925109	0			0.609834	0.609834
18_46141229_46298896_DUP	0	1	2248	3607	0.925109	0			0.609834	0.609834
2_47587751_47681133_DEL	1	0	2247	3608	0.518619	inf			0.609834	0.609834
2_88240910_89130884_DUP	1	0	2247	3608	0.518619	inf			0.609834	0.609834
5_55509554_55738764_DUP	0	1	2248	3607	0.925109	0			0.609834	0.609834
21_35729154_35900759_DUP	0	1	2248	3607	0.925109	0			0.609834	0.609834
9_139934107_139934107_DEL	1	0	2247	3608	0.518619	inf			0.609834	0.609834
4_5327180_5403545_DUP	0	1	2248	3607	0.925109	0			0.609834	0.609834
21_43229099_43322866_DEL	1	0	2247	3608	0.518619	inf			0.609834	0.609834
9_139947473_139947473_DEL	1	0	2247	3608	0.518619	inf			0.609834	0.609834
4_4701921_4748273_DUP	1	0	2247	3608	0.518619	inf			0.609834	0.609834
9_139952916_139952916_DEL	1	0	2247	3608	0.518619	inf			0.609834	0.609834
4_3601783_3902542_DUP	0	1	2248	3607	0.925109	0			0.609834	0.609834
4_1213463_1315183_DUP	1	0	2247	3608	0.518619	inf			0.609834	0.609834
3_196741670_196956971_DUP	1	0	2247	3608	0.518619	inf			0.609834	0.609834
22_23708020_23916424_DUP	0	1	2248	3607	0.925109	0			0.609834	0.609834
22_23708020_23916424_DEL	0	1	2248	3607	0.925109	0			0.609834	0.609834
22_25283602_25314193_DUP	1	0	2247	3608	0.518619	inf			0.609834	0.609834
1_4452838_4737666_DUP	0	1	2248	3607	0.925109	0			0.609834	0.609834
22_29544839_29621477_DUP	0	1	2248	3607	0.925109	0			0.609834	0.609834
22_29844314_30164511_DUP	0	1	2248	3607	0.925109	0			0.609834	0.609834
22_33740860_33875161_DUP	0	1	2248	3607	0.925109	0			0.609834	0.609834
3_194585833_194905648_DUP	0	1	2248	3607	0.925109	0			0.609834	0.609834
22_40288385_40390173_DUP	0	1	2248	3607	0.925109	0			0.609834	0.609834
3_191961614_192094744_DUP	1	0	2247	3608	0.518619	inf			0.609834	0.609834
3_184324735_184451014_DEL	1	0	2247	3608	0.518619	inf			0.609834	0.609834
4_7495063_7632223_DEL	0	1	2248	3607	0.925109	0			0.609834	0.609834
21_32086967_32227847_DUP	1	0	2247	3608	0.518619	inf			0.609834	0.609834
21_27926088_28210030_DUP	1	0	2247	3608	0.518619	inf			0.609834	0.609834
21_27013525_27126486_DUP	1	0	2247	3608	0.518619	inf			0.609834	0.609834
4_25421621_25471921_DUP	0	1	2248	3607	0.925109	0			0.609834	0.609834
20_35683464_35809783_DUP	1	0	2247	3608	0.518619	inf			0.609834	0.609834
4_24406860_24458672_DEL	0	1	2248	3607	0.925109	0			0.609834	0.609834
4_22774617_22800070_DEL	0	1	2248	3607	0.925109	0			0.609834	0.609834
4_21505217_21567120_DEL	0	1	2248	3607	0.925109	0			0.609834	0.609834
20_42153827_42487204_DUP	0	1	2248	3607	0.925109	0			0.609834	0.609834
4_18437665_18836582_DEL	1	0	2247	3608	0.518619	inf			0.609834	0.609834
20_48147756_48221796_DEL	0	1	2248	3607	0.925109	0			0.609834	0.609834
20_55289145_55404648_DEL	0	1	2248	3607	0.925109	0			0.609834	0.609834
20_55289145_55404648_DUP	0	1	2248	3607	0.925109	0			0.609834	0.609834
3_3101524_3227154_DUP	0	1	2248	3607	0.925109	0			0.609834	0.609834
20_59204084_59286456_DEL	1	0	2247	3608	0.518619	inf			0.609834	0.609834
1_7652590_7946441_DEL	0	1	2248	3607	0.925109	0			0.609834	0.609834
21_14946923_16199390_DUP	0	1	2248	3607	0.925109	0			0.609834	0.609834
4_12375400_12674326_DEL	0	1	2248	3607	0.925109	0			0.609834	0.609834
21_17531989_17654621_DUP	0	1	2248	3607	0.925109	0			0.609834	0.609834
21_19806803_20078424_DEL	0	1	2248	3607	0.925109	0			0.609834	0.609834
21_20117382_20211578_DEL	0	1	2248	3607	0.925109	0			0.609834	0.609834
21_23222304_23344268_DEL	0	1	2248	3607	0.925109	0			0.609834	0.609834
21_23424239_23560409_DEL	0	1	2248	3607	0.925109	0			0.609834	0.609834
21_23646543_23925128_DEL	0	1	2248	3607	0.925109	0			0.609834	0.609834
1_6562784_6638995_DUP	1	0	2247	3608	0.518619	inf			0.609834	0.609834
4_15874104_15964349_DUP	0	1	2248	3607	0.925109	0			0.609834	0.609834
3_3101524_3227154_DEL	0	1	2248	3607	0.925109	0			0.609834	0.609834
3_3712668_3993727_DUP	0	1	2248	3607	0.925109	0			0.609834	0.609834
3_175821930_176009669_DEL	1	0	2247	3608	0.518619	inf			0.609834	0.609834
3_34193969_35823997_DEL	0	1	2248	3607	0.925109	0			0.609834	0.609834
3_35825701_35938795_DEL	0	1	2248	3607	0.925109	0			0.609834	0.609834
3_35945504_36248995_DEL	0	1	2248	3607	0.925109	0			0.609834	0.609834
3_135966726_136139306_DUP	1	0	2247	3608	0.518619	inf			0.609834	0.609834
3_133431055_133519135_DEL	0	1	2248	3607	0.925109	0			0.609834	0.609834
3_126084407_126249588_DUP	0	1	2248	3607	0.925109	0			0.609834	0.609834
3_120378791_120470654_DEL	1	0	2247	3608	0.518619	inf			0.609834	0.609834
3_53929806_54343019_DUP	0	1	2248	3607	0.925109	0			0.609834	0.609834
3_116118632_118758169_DEL	0	1	2248	3607	0.925109	0			0.609834	0.609834
3_111313457_111554228_DUP	0	1	2248	3607	0.925109	0			0.609834	0.609834
3_34193969_35823997_DUP	1	0	2247	3608	0.518619	inf			0.609834	0.609834
3_109440679_109873808_DEL	0	1	2248	3607	0.925109	0			0.609834	0.609834
3_65515613_65589805_DUP	0	1	2248	3607	0.925109	0			0.609834	0.609834
3_102101245_102563068_DEL	1	0	2247	3608	0.518619	inf			0.609834	0.609834
3_101361045_101590325_DUP	1	0	2247	3608	0.518619	inf			0.609834	0.609834
3_99679754_99885236_DEL	0	1	2248	3607	0.925109	0			0.609834	0.609834
3_97997981_98111769_DEL	0	1	2248	3607	0.925109	0			0.609834	0.609834
3_76453574_77007830_DEL	0	1	2248	3607	0.925109	0			0.609834	0.609834
3_77271906_77420922_DEL	1	0	2247	3608	0.518619	inf			0.609834	0.609834
3_94832290_94964265_DUP	0	1	2248	3607	0.925109	0			0.609834	0.609834
3_82906760_83329109_DUP	0	1	2248	3607	0.925109	0			0.609834	0.609834
3_84197151_84550306_DUP	1	0	2247	3608	0.518619	inf			0.609834	0.609834
3_109024932_109136446_DUP	0	1	2248	3607	0.925109	0			0.609834	0.609834
4_27082016_27374303_DEL	0	1	2248	3607	0.925109	0			0.609834	0.609834
3_26541091_26646809_DEL	0	1	2248	3607	0.925109	0			0.609834	0.609834
3_24872778_24961167_DEL	1	0	2247	3608	0.518619	inf			0.609834	0.609834
3_4015109_4083174_DUP	0	1	2248	3607	0.925109	0			0.609834	0.609834
3_175608041_175703513_DEL	0	1	2248	3607	0.925109	0			0.609834	0.609834
3_4102091_4250372_DUP	0	1	2248	3607	0.925109	0			0.609834	0.609834
3_4305212_4753178_DUP	0	1	2248	3607	0.925109	0			0.609834	0.609834
3_4305212_4753178_DEL	1	0	2247	3608	0.518619	inf			0.609834	0.609834
3_5391833_5435957_DUP	0	1	2248	3607	0.925109	0			0.609834	0.609834
3_172119811_172193731_DUP	0	1	2248	3607	0.925109	0			0.609834	0.609834
3_5442857_6131326_DEL	0	1	2248	3607	0.925109	0			0.609834	0.609834
3_171071204_171302911_DUP	0	1	2248	3607	0.925109	0			0.609834	0.609834
3_6323887_7320514_DUP	0	1	2248	3607	0.925109	0			0.609834	0.609834
1_1859176_2038824_DUP	0	1	2248	3607	0.925109	0			0.609834	0.609834
3_6323887_7320514_DEL	0	1	2248	3607	0.925109	0			0.609834	0.609834
3_12050306_12450354_DUP	1	0	2247	3608	0.518619	inf			0.609834	0.609834
3_13098542_13613064_DUP	1	0	2247	3608	0.518619	inf			0.609834	0.609834
3_15499791_15547970_DEL	0	1	2248	3607	0.925109	0			0.609834	0.609834
3_166517229_166642007_DEL	1	0	2247	3608	0.518619	inf			0.609834	0.609834
3_159442244_159620433_DUP	0	1	2248	3607	0.925109	0			0.609834	0.609834
3_20305293_20433212_DEL	0	1	2248	3607	0.925109	0			0.609834	0.609834
3_21106352_21241383_DEL	1	0	2247	3608	0.518619	inf			0.609834	0.609834
3_137711649_138512169_DUP	1	0	2247	3608	0.518619	inf			0.609834	0.609834
3_22079751_22355080_DEL	0	1	2248	3607	0.925109	0			0.609834	0.609834
3_137181392_137232860_DUP	0	1	2248	3607	0.925109	0			0.609834	0.609834
3_7982332_8033068_DEL	0	1	2248	3607	0.925109	0			0.609834	0.609834
2_47819339_47922684_DUP	1	0	2247	3608	0.518619	inf			0.609834	0.609834
4_28798860_28799596_DUP	1	0	2247	3608	0.518619	inf			0.609834	0.609834
20_16759102_16832064_DUP	0	1	2248	3607	0.925109	0			0.609834	0.609834
2_83066255_83336508_DUP	0	1	2248	3607	0.925109	0			0.609834	0.609834
4_189184881_189258322_DUP	0	1	2248	3607	0.925109	0			0.609834	0.609834
2_83600950_83748742_DUP	1	0	2247	3608	0.518619	inf			0.609834	0.609834
2_86337930_86509388_DUP	0	1	2248	3607	0.925109	0			0.609834	0.609834
16_87673564_88039150_DUP	0	1	2248	3607	0.925109	0			0.609834	0.609834
2_96741757_98023948_DEL	1	0	2247	3608	0.518619	inf			0.609834	0.609834
2_101143716_101318711_DUP	1	0	2247	3608	0.518619	inf			0.609834	0.609834
2_102194026_102582068_DEL	1	0	2247	3608	0.518619	inf			0.609834	0.609834
2_106031730_106160606_DEL	0	1	2248	3607	0.925109	0			0.609834	0.609834
2_106874835_108440432_DUP	0	1	2248	3607	0.925109	0			0.609834	0.609834
4_179357208_179427494_DUP	1	0	2247	3608	0.518619	inf			0.609834	0.609834
4_178261661_178321418_DUP	1	0	2247	3608	0.518619	inf			0.609834	0.609834
2_117781598_117870572_DUP	0	1	2248	3607	0.925109	0			0.609834	0.609834
2_118178954_118402694_DUP	1	0	2247	3608	0.518619	inf			0.609834	0.609834
4_169174299_169331408_DEL	0	1	2248	3607	0.925109	0			0.609834	0.609834
4_168564107_168664285_DEL	0	1	2248	3607	0.925109	0			0.609834	0.609834
1_9465155_9514846_DUP	0	1	2248	3607	0.925109	0			0.609834	0.609834
4_160708061_162116243_DUP	1	0	2247	3608	0.518619	inf			0.609834	0.609834
2_126453806_127237657_DUP	0	1	2248	3607	0.925109	0			0.609834	0.609834
2_126453806_127237657_DEL	1	0	2247	3608	0.518619	inf			0.609834	0.609834
4_151303318_151608097_DEL	0	1	2248	3607	0.925109	0			0.609834	0.609834
2_81898005_82094566_DEL	0	1	2248	3607	0.925109	0			0.609834	0.609834
5_1065399_1207778_DUP	1	0	2247	3608	0.518619	inf			0.609834	0.609834
2_77321170_77338205_DEL	1	0	2247	3608	0.518619	inf			0.609834	0.609834
5_5176672_5225138_DEL	0	1	2248	3607	0.925109	0			0.609834	0.609834
5_54417835_54880701_DUP	0	1	2248	3607	0.925109	0			0.609834	0.609834
2_48831931_49092915_DUP	1	0	2247	3608	0.518619	inf			0.609834	0.609834
2_49099508_49230413_DUP	1	0	2247	3608	0.518619	inf			0.609834	0.609834
5_37709631_37877690_DUP	1	0	2247	3608	0.518619	inf			0.609834	0.609834
5_33139201_34119847_DUP	1	0	2247	3608	0.518619	inf			0.609834	0.609834
5_29845360_32317439_DUP	0	1	2248	3607	0.925109	0			0.609834	0.609834
5_27583734_27719260_DEL	0	1	2248	3607	0.925109	0			0.609834	0.609834
5_24733157_24862568_DUP	0	1	2248	3607	0.925109	0			0.609834	0.609834
5_19416456_20302089_DUP	0	1	2248	3607	0.925109	0			0.609834	0.609834
9_139926054_139926054_DEL	1	0	2247	3608	0.518619	inf			0.609834	0.609834
2_132915518_133351703_DUP	0	1	2248	3607	0.925109	0			0.609834	0.609834
2_54954824_55034113_DEL	0	1	2248	3607	0.925109	0			0.609834	0.609834
2_55385294_55560903_DUP	1	0	2247	3608	0.518619	inf			0.609834	0.609834
5_9886796_10175162_DEL	0	1	2248	3607	0.925109	0			0.609834	0.609834
5_7526676_7911043_DUP	1	0	2247	3608	0.518619	inf			0.609834	0.609834
2_61002427_61099420_DEL	0	1	2248	3607	0.925109	0			0.609834	0.609834
2_61105077_61368845_DEL	0	1	2248	3607	0.925109	0			0.609834	0.609834
2_64068068_64263369_DEL	1	0	2247	3608	0.518619	inf			0.609834	0.609834
2_73792786_73842174_DEL	0	1	2248	3607	0.925109	0			0.609834	0.609834
2_75156603_75157980_DUP	1	0	2247	3608	0.518619	inf			0.609834	0.609834
5_5367152_5449367_DUP	0	1	2248	3607	0.925109	0			0.609834	0.609834
2_76751510_77229536_DEL	1	0	2247	3608	0.518619	inf			0.609834	0.609834
2_55075732_55150611_DEL	0	1	2248	3607	0.925109	0			0.609834	0.609834
4_145631599_145782963_DEL	0	1	2248	3607	0.925109	0			0.609834	0.609834
4_134931869_135178842_DEL	0	1	2248	3607	0.925109	0			0.609834	0.609834
2_145530266_145871379_DUP	0	1	2248	3607	0.925109	0			0.609834	0.609834
2_216871444_216972732_DUP	0	1	2248	3607	0.925109	0			0.609834	0.609834
2_217127309_217127309_DUP	1	0	2247	3608	0.518619	inf			0.609834	0.609834
4_77357592_77482463_DEL	1	0	2247	3608	0.518619	inf			0.609834	0.609834
4_76191643_76519096_DUP	0	1	2248	3607	0.925109	0			0.609834	0.609834
4_76010215_76117201_DUP	0	1	2248	3607	0.925109	0			0.609834	0.609834
2_231701617_231767095_DEL	0	1	2248	3607	0.925109	0			0.609834	0.609834
4_62594419_63345570_DEL	1	0	2247	3608	0.518619	inf			0.609834	0.609834
2_233319911_233319911_DEL	0	1	2248	3607	0.925109	0			0.609834	0.609834
2_234939143_234984861_DUP	0	1	2248	3607	0.925109	0			0.609834	0.609834
2_239928972_239964373_DEL	0	1	2248	3607	0.925109	0			0.609834	0.609834
2_216251279_216287234_DEL	0	1	2248	3607	0.925109	0			0.609834	0.609834
2_240175942_240245917_DEL	1	0	2247	3608	0.518619	inf			0.609834	0.609834
2_241540110_241600412_DUP	1	0	2247	3608	0.518619	inf			0.609834	0.609834
4_53325022_53434611_DEL	1	0	2247	3608	0.518619	inf			0.609834	0.609834
2_241991875_242100062_DEL	1	0	2247	3608	0.518619	inf			0.609834	0.609834
20_3740122_4957700_DUP	1	0	2247	3608	0.518619	inf			0.609834	0.609834
4_40684941_40778256_DUP	0	1	2248	3607	0.925109	0			0.609834	0.609834
20_5790591_5832150_DUP	0	1	2248	3607	0.925109	0			0.609834	0.609834
20_9571344_9627479_DUP	0	1	2248	3607	0.925109	0			0.609834	0.609834
20_12812565_12819717_DUP	0	1	2248	3607	0.925109	0			0.609834	0.609834
20_14622728_14671075_DEL	0	1	2248	3607	0.925109	0			0.609834	0.609834
4_33523164_33718069_DEL	0	1	2248	3607	0.925109	0			0.609834	0.609834
2_241106451_241168633_DEL	0	1	2248	3607	0.925109	0			0.609834	0.609834
4_30926766_31069340_DUP	1	0	2247	3608	0.518619	inf			0.609834	0.609834
4_80986641_81257907_DEL	0	1	2248	3607	0.925109	0			0.609834	0.609834
2_210256170_210463061_DEL	1	0	2247	3608	0.518619	inf			0.609834	0.609834
2_148258128_148317727_DEL	0	1	2248	3607	0.925109	0			0.609834	0.609834
2_148865529_149063814_DEL	0	1	2248	3607	0.925109	0			0.609834	0.609834
2_150580244_150832334_DUP	0	1	2248	3607	0.925109	0			0.609834	0.609834
2_158496696_158584262_DUP	1	0	2247	3608	0.518619	inf			0.609834	0.609834
2_162900834_163627077_DUP	1	0	2247	3608	0.518619	inf			0.609834	0.609834
4_130966165_131061059_DEL	0	1	2248	3607	0.925109	0			0.609834	0.609834
2_167298015_167417575_DUP	1	0	2247	3608	0.518619	inf			0.609834	0.609834
2_167422236_167494012_DUP	1	0	2247	3608	0.518619	inf			0.609834	0.609834
4_117636735_117865156_DUP	0	1	2248	3607	0.925109	0			0.609834	0.609834
2_168636999_168687153_DEL	0	1	2248	3607	0.925109	0			0.609834	0.609834
2_212425365_212909462_DUP	1	0	2247	3608	0.518619	inf			0.609834	0.609834
2_174863443_174930016_DUP	0	1	2248	3607	0.925109	0			0.609834	0.609834
4_117508067_117630240_DEL	0	1	2248	3607	0.925109	0			0.609834	0.609834
4_112275298_112438401_DEL	1	0	2247	3608	0.518619	inf			0.609834	0.609834
9_139929435_139929435_DEL	1	0	2247	3608	0.518619	inf			0.609834	0.609834
2_186387129_186834192_DUP	1	0	2247	3608	0.518619	inf			0.609834	0.609834
2_192436267_192533998_DUP	0	1	2248	3607	0.925109	0			0.609834	0.609834
4_106732957_106864927_DUP	0	1	2248	3607	0.925109	0			0.609834	0.609834
4_94536111_94594845_DUP	1	0	2247	3608	0.518619	inf			0.609834	0.609834
4_88030261_88290265_DEL	1	0	2247	3608	0.518619	inf			0.609834	0.609834
4_87765011_87864677_DUP	1	0	2247	3608	0.518619	inf			0.609834	0.609834
2_205636253_205840622_DUP	0	1	2248	3607	0.925109	0			0.609834	0.609834
2_178381104_178463776_DUP	0	1	2248	3607	0.925109	0			0.609834	0.609834
16_86997497_87159799_DEL	1	0	2247	3608	0.518619	inf			0.609834	0.609834
16_69750849_70566319_DUP	1	0	2247	3608	0.518619	inf			0.609834	0.609834
16_85295245_85341713_DEL	1	0	2247	3608	0.518619	inf			0.609834	0.609834
8_144065004_144756386_DUP	0	1	2248	3607	0.925109	0			0.609834	0.609834
11_81048744_81159235_DEL	0	1	2248	3607	0.925109	0			0.609834	0.609834
1_77453593_77579144_DUP	0	1	2248	3607	0.925109	0			0.609834	0.609834
11_82194775_82770527_DEL	0	1	2248	3607	0.925109	0			0.609834	0.609834
8_137688230_137688230_DEL	1	0	2247	3608	0.518619	inf			0.609834	0.609834
11_85430380_85430380_DEL	1	0	2247	3608	0.518619	inf			0.609834	0.609834
8_130377654_130456219_DEL	0	1	2248	3607	0.925109	0			0.609834	0.609834
11_90209402_90330380_DEL	0	1	2248	3607	0.925109	0			0.609834	0.609834
11_91047120_91352621_DEL	1	0	2247	3608	0.518619	inf			0.609834	0.609834
11_92651002_93074029_DUP	1	0	2247	3608	0.518619	inf			0.609834	0.609834
11_92651002_93074029_DEL	0	1	2248	3607	0.925109	0			0.609834	0.609834
11_96155679_96155679_DUP	1	0	2247	3608	0.518619	inf			0.609834	0.609834
1_77214364_77318003_DEL	1	0	2247	3608	0.518619	inf			0.609834	0.609834
8_113644350_113761143_DEL	0	1	2248	3607	0.925109	0			0.609834	0.609834
11_104045767_105279874_DUP	1	0	2247	3608	0.518619	inf			0.609834	0.609834
11_107755731_107918899_DUP	0	1	2248	3607	0.925109	0			0.609834	0.609834
11_108057226_108283161_DUP	1	0	2247	3608	0.518619	inf			0.609834	0.609834
11_110112611_110215976_DUP	0	1	2248	3607	0.925109	0			0.609834	0.609834
11_111269435_111320003_DUP	0	1	2248	3607	0.925109	0			0.609834	0.609834
11_117281566_117350098_DUP	1	0	2247	3608	0.518619	inf			0.609834	0.609834
11_120556817_120628012_DEL	0	1	2248	3607	0.925109	0			0.609834	0.609834
8_79877609_79941386_DEL	0	1	2248	3607	0.925109	0			0.609834	0.609834
11_127952873_128002947_DEL	0	1	2248	3607	0.925109	0			0.609834	0.609834
11_80407395_80551052_DEL	0	1	2248	3607	0.925109	0			0.609834	0.609834
11_128025266_128306404_DUP	0	1	2248	3607	0.925109	0			0.609834	0.609834
9_1044549_1090919_DUP	0	1	2248	3607	0.925109	0			0.609834	0.609834
11_60759847_60841281_DUP	0	1	2248	3607	0.925109	0			0.609834	0.609834
11_12290628_12374101_DUP	1	0	2247	3608	0.518619	inf			0.609834	0.609834
11_21753111_21968847_DEL	0	1	2248	3607	0.925109	0			0.609834	0.609834
11_22854616_23268171_DUP	1	0	2247	3608	0.518619	inf			0.609834	0.609834
1_83857369_84440889_DUP	0	1	2248	3607	0.925109	0			0.609834	0.609834
11_24892439_25148066_DUP	1	0	2247	3608	0.518619	inf			0.609834	0.609834
9_9667476_9718066_DUP	1	0	2247	3608	0.518619	inf			0.609834	0.609834
9_9014667_9102409_DEL	0	1	2248	3607	0.925109	0			0.609834	0.609834
9_8546095_8585367_DEL	0	1	2248	3607	0.925109	0			0.609834	0.609834
11_26482181_26600371_DEL	0	1	2248	3607	0.925109	0			0.609834	0.609834
9_7900048_7963435_DEL	0	1	2248	3607	0.925109	0			0.609834	0.609834
9_7770233_7874386_DEL	1	0	2247	3608	0.518619	inf			0.609834	0.609834
9_7205742_7249205_DUP	0	1	2248	3607	0.925109	0			0.609834	0.609834
9_6935297_7175689_DUP	0	1	2248	3607	0.925109	0			0.609834	0.609834
11_33161635_33412712_DUP	0	1	2248	3607	0.925109	0			0.609834	0.609834
9_5762600_5884281_DEL	0	1	2248	3607	0.925109	0			0.609834	0.609834
9_4550752_4603071_DEL	0	1	2248	3607	0.925109	0			0.609834	0.609834
11_39075449_39199019_DEL	0	1	2248	3607	0.925109	0			0.609834	0.609834
11_39633353_39772957_DUP	0	1	2248	3607	0.925109	0			0.609834	0.609834
9_4163607_4547288_DEL	0	1	2248	3607	0.925109	0			0.609834	0.609834
9_139925415_139925415_DEL	1	0	2247	3608	0.518619	inf			0.609834	0.609834
9_3566908_3600614_DEL	1	0	2247	3608	0.518619	inf			0.609834	0.609834
11_59049385_59262971_DUP	0	1	2248	3607	0.925109	0			0.609834	0.609834
9_2537934_2815542_DUP	0	1	2248	3607	0.925109	0			0.609834	0.609834
9_1315952_1523296_DEL	0	1	2248	3607	0.925109	0			0.609834	0.609834
8_73937384_74038028_DUP	0	1	2248	3607	0.925109	0			0.609834	0.609834
8_73201039_73362337_DEL	1	0	2247	3608	0.518619	inf			0.609834	0.609834
8_60233455_60723345_DEL	0	1	2248	3607	0.925109	0			0.609834	0.609834
12_62314921_62484392_DUP	0	1	2248	3607	0.925109	0			0.609834	0.609834
8_6742077_6786781_DEL	0	1	2248	3607	0.925109	0			0.609834	0.609834
12_68853791_68961584_DUP	1	0	2247	3608	0.518619	inf			0.609834	0.609834
12_71736457_71861186_DUP	1	0	2247	3608	0.518619	inf			0.609834	0.609834
12_72990194_73585383_DUP	0	1	2248	3607	0.925109	0			0.609834	0.609834
12_76695265_76850082_DUP	0	1	2248	3607	0.925109	0			0.609834	0.609834
12_80500294_82430283_DUP	0	1	2248	3607	0.925109	0			0.609834	0.609834
8_6656865_6691764_DEL	1	0	2247	3608	0.518619	inf			0.609834	0.609834
12_90161421_90773613_DUP	0	1	2248	3607	0.925109	0			0.609834	0.609834
9_139925446_139925446_DEL	1	0	2247	3608	0.518619	inf			0.609834	0.609834
16_86751820_86817240_DEL	0	1	2248	3607	0.925109	0			0.609834	0.609834
12_91499897_92109473_DEL	0	1	2248	3607	0.925109	0			0.609834	0.609834
12_91499897_92109473_DUP	0	1	2248	3607	0.925109	0			0.609834	0.609834
9_139925490_139925490_DEL	1	0	2247	3608	0.518619	inf			0.609834	0.609834
12_108790727_108889645_DUP	1	0	2247	3608	0.518619	inf			0.609834	0.609834
12_118134755_118822918_DUP	0	1	2248	3607	0.925109	0			0.609834	0.609834
12_124171417_124242557_DEL	1	0	2247	3608	0.518619	inf			0.609834	0.609834
12_126864489_126988692_DEL	1	0	2247	3608	0.518619	inf			0.609834	0.609834
12_127800403_128051685_DUP	1	0	2247	3608	0.518619	inf			0.609834	0.609834
12_128132746_128500278_DEL	1	0	2247	3608	0.518619	inf			0.609834	0.609834
8_1991272_2070062_DEL	1	0	2247	3608	0.518619	inf			0.609834	0.609834
12_132297655_132382001_DUP	1	0	2247	3608	0.518619	inf			0.609834	0.609834
7_158186141_158272116_DUP	0	1	2248	3607	0.925109	0			0.609834	0.609834
8_8321517_8439068_DEL	1	0	2247	3608	0.518619	inf			0.609834	0.609834
12_54928046_55042807_DUP	0	1	2248	3607	0.925109	0			0.609834	0.609834
8_10328677_10450049_DEL	0	1	2248	3607	0.925109	0			0.609834	0.609834
12_50569262_50750471_DUP	1	0	2247	3608	0.518619	inf			0.609834	0.609834
8_58405076_58534161_DUP	0	1	2248	3607	0.925109	0			0.609834	0.609834
8_57982359_58353280_DEL	1	0	2247	3608	0.518619	inf			0.609834	0.609834
11_134436003_134626887_DUP	1	0	2247	3608	0.518619	inf			0.609834	0.609834
8_56881218_56997571_DEL	1	0	2247	3608	0.518619	inf			0.609834	0.609834
8_56723557_56876219_DEL	1	0	2247	3608	0.518619	inf			0.609834	0.609834
8_55896302_56712013_DUP	1	0	2247	3608	0.518619	inf			0.609834	0.609834
8_55896302_56712013_DEL	1	0	2247	3608	0.518619	inf			0.609834	0.609834
12_1951805_1983801_DEL	0	1	2248	3607	0.925109	0			0.609834	0.609834
8_53055483_53264939_DEL	1	0	2247	3608	0.518619	inf			0.609834	0.609834
8_51912197_52181991_DUP	0	1	2248	3607	0.925109	0			0.609834	0.609834
12_5233825_5393404_DEL	0	1	2248	3607	0.925109	0			0.609834	0.609834
9_12780670_12908447_DEL	0	1	2248	3607	0.925109	0			0.609834	0.609834
8_41906095_42072438_DUP	0	1	2248	3607	0.925109	0			0.609834	0.609834
8_40962857_41004362_DEL	0	1	2248	3607	0.925109	0			0.609834	0.609834
8_28682594_28783032_DUP	0	1	2248	3607	0.925109	0			0.609834	0.609834
12_16105710_16187228_DEL	0	1	2248	3607	0.925109	0			0.609834	0.609834
12_19037097_19107330_DEL	1	0	2247	3608	0.518619	inf			0.609834	0.609834
8_20492697_20699439_DEL	0	1	2248	3607	0.925109	0			0.609834	0.609834
12_20529327_20740933_DEL	0	1	2248	3607	0.925109	0			0.609834	0.609834
12_24860035_25213582_DUP	0	1	2248	3607	0.925109	0			0.609834	0.609834
8_17576910_17626307_DEL	1	0	2247	3608	0.518619	inf			0.609834	0.609834
12_29488898_29959123_DEL	0	1	2248	3607	0.925109	0			0.609834	0.609834
12_42165804_42376118_DUP	0	1	2248	3607	0.925109	0			0.609834	0.609834
8_11395295_11426113_DUP	0	1	2248	3607	0.925109	0			0.609834	0.609834
12_5672960_5680477_DUP	0	1	2248	3607	0.925109	0			0.609834	0.609834
9_12931403_12934851_DEL	0	1	2248	3607	0.925109	0			0.609834	0.609834
11_7780588_7876081_DEL	0	1	2248	3607	0.925109	0			0.609834	0.609834
11_6707887_6885429_DUP	0	1	2248	3607	0.925109	0			0.609834	0.609834
1_225841744_225967597_DUP	0	1	2248	3607	0.925109	0			0.609834	0.609834
9_139911059_139911059_DEL	1	0	2247	3608	0.518619	inf			0.609834	0.609834
1_228202931_228239909_DUP	0	1	2248	3607	0.925109	0			0.609834	0.609834
1_232239312_232355455_DEL	1	0	2247	3608	0.518619	inf			0.609834	0.609834
1_237271291_237349738_DEL	0	1	2248	3607	0.925109	0			0.609834	0.609834
1_238219114_238599217_DUP	1	0	2247	3608	0.518619	inf			0.609834	0.609834
9_139908419_139908419_DEL	1	0	2247	3608	0.518619	inf			0.609834	0.609834
1_239354088_239555531_DUP	0	1	2248	3607	0.925109	0			0.609834	0.609834
1_240392709_240570088_DEL	1	0	2247	3608	0.518619	inf			0.609834	0.609834
1_246534452_246738141_DUP	0	1	2248	3607	0.925109	0			0.609834	0.609834
1_91060620_91165138_DUP	0	1	2248	3607	0.925109	0			0.609834	0.609834
10_3326652_3366193_DEL	1	0	2247	3608	0.518619	inf			0.609834	0.609834
10_3374178_3775523_DEL	1	0	2247	3608	0.518619	inf			0.609834	0.609834
9_118213864_118316056_DEL	0	1	2248	3607	0.925109	0			0.609834	0.609834
9_117011595_117103973_DUP	1	0	2247	3608	0.518619	inf			0.609834	0.609834
10_14112643_14199239_DUP	1	0	2247	3608	0.518619	inf			0.609834	0.609834
9_113850877_113957534_DUP	0	1	2248	3607	0.925109	0			0.609834	0.609834
10_19073973_19835505_DEL	0	1	2248	3607	0.925109	0			0.609834	0.609834
10_26096852_26315356_DEL	0	1	2248	3607	0.925109	0			0.609834	0.609834
10_27092492_27092492_DUP	0	1	2248	3607	0.925109	0			0.609834	0.609834
9_107720003_107789252_DEL	0	1	2248	3607	0.925109	0			0.609834	0.609834
9_105546493_105780558_DUP	0	1	2248	3607	0.925109	0			0.609834	0.609834
9_105049096_105056347_DUP	1	0	2247	3608	0.518619	inf			0.609834	0.609834
9_139911998_139911998_DEL	1	0	2247	3608	0.518619	inf			0.609834	0.609834
9_139912047_139912047_DEL	1	0	2247	3608	0.518619	inf			0.609834	0.609834
1_202912422_202997854_DEL	0	1	2248	3607	0.925109	0			0.609834	0.609834
1_191298169_191627282_DEL	1	0	2247	3608	0.518619	inf			0.609834	0.609834
1_97663193_98049233_DEL	0	1	2248	3607	0.925109	0			0.609834	0.609834
1_99667847_99913450_DUP	0	1	2248	3607	0.925109	0			0.609834	0.609834
9_139925383_139925383_DEL	1	0	2247	3608	0.518619	inf			0.609834	0.609834
1_105011378_105193317_DUP	0	1	2248	3607	0.925109	0			0.609834	0.609834
1_106717663_106809326_DEL	0	1	2248	3607	0.925109	0			0.609834	0.609834
1_109680559_109759998_DEL	1	0	2247	3608	0.518619	inf			0.609834	0.609834
9_139925275_139925275_DEL	1	0	2247	3608	0.518619	inf			0.609834	0.609834
9_139925221_139925221_DEL	1	0	2247	3608	0.518619	inf			0.609834	0.609834
1_117100957_118276152_DUP	1	0	2247	3608	0.518619	inf			0.609834	0.609834
1_118889632_119034534_DUP	0	1	2248	3607	0.925109	0			0.609834	0.609834
1_119930338_120014607_DUP	0	1	2248	3607	0.925109	0			0.609834	0.609834
10_29173102_29258268_DEL	0	1	2248	3607	0.925109	0			0.609834	0.609834
1_120098815_120437884_DUP	0	1	2248	3607	0.925109	0			0.609834	0.609834
9_139925166_139925166_DEL	1	0	2247	3608	0.518619	inf			0.609834	0.609834
1_145801230_145801230_DUP	0	1	2248	3607	0.925109	0			0.609834	0.609834
9_139916879_139916879_DEL	1	0	2247	3608	0.518619	inf			0.609834	0.609834
1_158019933_158087841_DUP	1	0	2247	3608	0.518619	inf			0.609834	0.609834
1_159978943_160142361_DUP	0	1	2248	3607	0.925109	0			0.609834	0.609834
9_139916833_139916833_DEL	1	0	2247	3608	0.518619	inf			0.609834	0.609834
1_167348551_167408073_DEL	0	1	2248	3607	0.925109	0			0.609834	0.609834
9_139916350_139916350_DEL	1	0	2247	3608	0.518619	inf			0.609834	0.609834
1_177626285_178272704_DUP	1	0	2247	3608	0.518619	inf			0.609834	0.609834
9_139915879_139915879_DEL	1	0	2247	3608	0.518619	inf			0.609834	0.609834
9_139912504_139912504_DEL	1	0	2247	3608	0.518619	inf			0.609834	0.609834
9_139925205_139925205_DEL	1	0	2247	3608	0.518619	inf			0.609834	0.609834
7_157870618_158166170_DUP	1	0	2247	3608	0.518619	inf			0.609834	0.609834
9_104939023_104977287_DUP	0	1	2248	3607	0.925109	0			0.609834	0.609834
10_44456029_45026907_DEL	0	1	2248	3607	0.925109	0			0.609834	0.609834
9_28771537_28817957_DEL	0	1	2248	3607	0.925109	0			0.609834	0.609834
10_96522365_96631816_DEL	1	0	2247	3608	0.518619	inf			0.609834	0.609834
9_25912839_26162706_DEL	0	1	2248	3607	0.925109	0			0.609834	0.609834
10_98678682_98832697_DUP	1	0	2247	3608	0.518619	inf			0.609834	0.609834
9_25694413_25794446_DUP	0	1	2248	3607	0.925109	0			0.609834	0.609834
10_106154143_106285308_DEL	0	1	2248	3607	0.925109	0			0.609834	0.609834
10_107107851_107275658_DUP	0	1	2248	3607	0.925109	0			0.609834	0.609834
9_24051359_24051359_DEL	1	0	2247	3608	0.518619	inf			0.609834	0.609834
1_86940715_86988622_DUP	0	1	2248	3607	0.925109	0			0.609834	0.609834
9_21943952_22013063_DUP	0	1	2248	3607	0.925109	0			0.609834	0.609834
9_21431339_21555445_DEL	1	0	2247	3608	0.518619	inf			0.609834	0.609834
10_121387549_121462638_DUP	1	0	2247	3608	0.518619	inf			0.609834	0.609834
10_124853470_124974126_DUP	0	1	2248	3607	0.925109	0			0.609834	0.609834
10_127058406_127165054_DUP	0	1	2248	3607	0.925109	0			0.609834	0.609834
10_127769545_127931073_DUP	0	1	2248	3607	0.925109	0			0.609834	0.609834
10_129273673_129482294_DUP	0	1	2248	3607	0.925109	0			0.609834	0.609834
10_131830640_131888112_DEL	0	1	2248	3607	0.925109	0			0.609834	0.609834
10_134124871_134215244_DUP	0	1	2248	3607	0.925109	0			0.609834	0.609834
10_134871976_134937104_DUP	0	1	2248	3607	0.925109	0			0.609834	0.609834
11_3676824_3824040_DUP	1	0	2247	3608	0.518619	inf			0.609834	0.609834
11_5084742_5220312_DUP	1	0	2247	3608	0.518619	inf			0.609834	0.609834
11_5084742_5220312_DEL	0	1	2248	3607	0.925109	0			0.609834	0.609834
9_16725894_16806728_DEL	1	0	2247	3608	0.518619	inf			0.609834	0.609834
9_29282192_29447139_DEL	1	0	2247	3608	0.518619	inf			0.609834	0.609834
10_85664031_85777245_DUP	0	1	2248	3607	0.925109	0			0.609834	0.609834
10_85165536_85496668_DUP	1	0	2247	3608	0.518619	inf			0.609834	0.609834
9_29879967_30093039_DUP	0	1	2248	3607	0.925109	0			0.609834	0.609834
9_93658854_93718266_DEL	1	0	2247	3608	0.518619	inf			0.609834	0.609834
9_88071696_88565033_DUP	0	1	2248	3607	0.925109	0			0.609834	0.609834
10_51497296_51593354_DUP	0	1	2248	3607	0.925109	0			0.609834	0.609834
9_85736936_85816469_DEL	0	1	2248	3607	0.925109	0			0.609834	0.609834
10_52548905_52705845_DUP	1	0	2247	3608	0.518619	inf			0.609834	0.609834
10_53760357_53804712_DEL	0	1	2248	3607	0.925109	0			0.609834	0.609834
10_54320516_56771835_DUP	0	1	2248	3607	0.925109	0			0.609834	0.609834
9_139925395_139925395_DEL	1	0	2247	3608	0.518619	inf			0.609834	0.609834
10_56886355_56937915_DEL	0	1	2248	3607	0.925109	0			0.609834	0.609834
10_57075157_57653432_DUP	0	1	2248	3607	0.925109	0			0.609834	0.609834
10_59500737_59686104_DUP	0	1	2248	3607	0.925109	0			0.609834	0.609834
10_34656697_34776680_DUP	1	0	2247	3608	0.518619	inf			0.609834	0.609834
10_66319465_66603601_DEL	0	1	2248	3607	0.925109	0			0.609834	0.609834
9_82921399_82921399_DUP	1	0	2247	3608	0.518619	inf			0.609834	0.609834
9_80061642_80189180_DUP	0	1	2248	3607	0.925109	0			0.609834	0.609834
9_73718746_73937299_DEL	0	1	2248	3607	0.925109	0			0.609834	0.609834
1_90532256_90668256_DUP	0	1	2248	3607	0.925109	0			0.609834	0.609834
10_74127221_74317267_DUP	0	1	2248	3607	0.925109	0			0.609834	0.609834
9_31305327_31669518_DEL	1	0	2247	3608	0.518619	inf			0.609834	0.609834
9_30677483_30817749_DEL	0	1	2248	3607	0.925109	0			0.609834	0.609834
10_81971019_81984357_DUP	0	1	2248	3607	0.925109	0			0.609834	0.609834
10_83057105_83199854_DEL	0	1	2248	3607	0.925109	0			0.609834	0.609834
10_83298806_83681448_DUP	0	1	2248	3607	0.925109	0			0.609834	0.609834
9_29879967_30093039_DEL	0	1	2248	3607	0.925109	0			0.609834	0.609834
10_67183928_67459595_DEL	1	0	2247	3608	0.518619	inf			0.609834	0.609834
13_23524030_24927971_DEL	0	1	2248	3607	0.925109	0			0.609834	0.609834
3_94069313_94216669_DUP	0	1	2248	3607	0.925109	0			0.609834	0.609834
13_29548289_29765897_DEL	1	0	2247	3608	0.518619	inf			0.609834	0.609834
15_55916703_56105907_DEL	0	1	2248	3607	0.925109	0			0.609834	0.609834
15_56733662_56824711_DEL	1	0	2247	3608	0.518619	inf			0.609834	0.609834
9_139925644_139925644_DEL	1	0	2247	3608	0.518619	inf			0.609834	0.609834
7_33059407_33226521_DUP	0	1	2248	3607	0.925109	0			0.609834	0.609834
15_59614841_59907586_DUP	0	1	2248	3607	0.925109	0			0.609834	0.609834
7_27230831_27516343_DUP	0	1	2248	3607	0.925109	0			0.609834	0.609834
7_25377056_25501256_DUP	0	1	2248	3607	0.925109	0			0.609834	0.609834
15_66347290_66450974_DUP	0	1	2248	3607	0.925109	0			0.609834	0.609834
15_67090218_67138238_DEL	0	1	2248	3607	0.925109	0			0.609834	0.609834
7_24142977_24647298_DEL	0	1	2248	3607	0.925109	0			0.609834	0.609834
7_37696431_37841534_DUP	0	1	2248	3607	0.925109	0			0.609834	0.609834
15_74600668_74637867_DEL	1	0	2247	3608	0.518619	inf			0.609834	0.609834
15_86460661_86512425_DEL	0	1	2248	3607	0.925109	0			0.609834	0.609834
7_18830489_18922889_DEL	1	0	2247	3608	0.518619	inf			0.609834	0.609834
7_17524738_17574314_DUP	0	1	2248	3607	0.925109	0			0.609834	0.609834
7_15528383_15548140_DEL	0	1	2248	3607	0.925109	0			0.609834	0.609834
15_89716846_89867564_DEL	1	0	2247	3608	0.518619	inf			0.609834	0.609834
15_93074890_93173072_DUP	1	0	2247	3608	0.518619	inf			0.609834	0.609834
7_15162498_15377889_DUP	1	0	2247	3608	0.518619	inf			0.609834	0.609834
7_15054804_15154665_DUP	1	0	2247	3608	0.518619	inf			0.609834	0.609834
15_95411105_95662785_DUP	1	0	2247	3608	0.518619	inf			0.609834	0.609834
15_95666177_95940811_DUP	1	0	2247	3608	0.518619	inf			0.609834	0.609834
7_24142977_24647298_DUP	0	1	2248	3607	0.925109	0			0.609834	0.609834
7_14788316_14877278_DEL	0	1	2248	3607	0.925109	0			0.609834	0.609834
15_55090357_55140204_DUP	0	1	2248	3607	0.925109	0			0.609834	0.609834
15_52504009_52592787_DEL	0	1	2248	3607	0.925109	0			0.609834	0.609834
14_80373039_80447044_DUP	0	1	2248	3607	0.925109	0			0.609834	0.609834
1_71635335_71767431_DEL	1	0	2247	3608	0.518619	inf			0.609834	0.609834
14_81141399_81438498_DUP	1	0	2247	3608	0.518619	inf			0.609834	0.609834
1_69437375_69528866_DEL	0	1	2248	3607	0.925109	0			0.609834	0.609834
14_87965805_88391067_DEL	1	0	2247	3608	0.518619	inf			0.609834	0.609834
9_139925590_139925590_DEL	1	0	2247	3608	0.518619	inf			0.609834	0.609834
14_104591453_104628406_DUP	1	0	2247	3608	0.518619	inf			0.609834	0.609834
14_105954949_106016434_DUP	1	0	2247	3608	0.518619	inf			0.609834	0.609834
7_54325177_54418986_DUP	0	1	2248	3607	0.925109	0			0.609834	0.609834
1_66416939_66700873_DEL	0	1	2248	3607	0.925109	0			0.609834	0.609834
15_53948377_54031781_DEL	1	0	2247	3608	0.518619	inf			0.609834	0.609834
1_65860660_65946506_DUP	0	1	2248	3607	0.925109	0			0.609834	0.609834
15_34895638_35031653_DUP	0	1	2248	3607	0.925109	0			0.609834	0.609834
7_47722237_47951430_DUP	0	1	2248	3607	0.925109	0			0.609834	0.609834
7_151818665_152033833_DUP	0	1	2248	3607	0.925109	0			0.609834	0.609834
15_44907562_44968772_DEL	1	0	2247	3608	0.518619	inf			0.609834	0.609834
15_45005264_45096735_DUP	0	1	2248	3607	0.925109	0			0.609834	0.609834
15_46039538_46125769_DUP	0	1	2248	3607	0.925109	0			0.609834	0.609834
15_46160498_46276580_DEL	0	1	2248	3607	0.925109	0			0.609834	0.609834
15_48523886_48595366_DUP	1	0	2247	3608	0.518619	inf			0.609834	0.609834
15_51294759_51599683_DEL	0	1	2248	3607	0.925109	0			0.609834	0.609834
15_52247898_52407839_DUP	0	1	2248	3607	0.925109	0			0.609834	0.609834
15_33824193_33990976_DUP	0	1	2248	3607	0.925109	0			0.609834	0.609834
7_14090857_14150037_DEL	1	0	2247	3608	0.518619	inf			0.609834	0.609834
7_12898648_12967449_DEL	0	1	2248	3607	0.925109	0			0.609834	0.609834
15_99640612_99913319_DUP	0	1	2248	3607	0.925109	0			0.609834	0.609834
16_26193476_26323475_DUP	0	1	2248	3607	0.925109	0			0.609834	0.609834
6_151853949_151939350_DUP	0	1	2248	3607	0.925109	0			0.609834	0.609834
16_28826049_29044745_DUP	0	1	2248	3607	0.925109	0			0.609834	0.609834
6_151093961_151129553_DUP	0	1	2248	3607	0.925109	0			0.609834	0.609834
6_150303241_150409997_DUP	1	0	2247	3608	0.518619	inf			0.609834	0.609834
16_54464218_54494424_DUP	0	1	2248	3607	0.925109	0			0.609834	0.609834
6_142245981_142433051_DUP	0	1	2248	3607	0.925109	0			0.609834	0.609834
6_142245981_142433051_DEL	1	0	2247	3608	0.518619	inf			0.609834	0.609834
16_63301476_63461623_DUP	1	0	2247	3608	0.518619	inf			0.609834	0.609834
1_95064335_95376730_DUP	0	1	2248	3607	0.925109	0			0.609834	0.609834
16_21956457_22414463_DEL	0	1	2248	3607	0.925109	0			0.609834	0.609834
6_142073541_142236407_DUP	0	1	2248	3607	0.925109	0			0.609834	0.609834
16_74634884_74709851_DEL	0	1	2248	3607	0.925109	0			0.609834	0.609834
16_75646423_75853021_DUP	0	1	2248	3607	0.925109	0			0.609834	0.609834
6_140676823_141407819_DEL	0	1	2248	3607	0.925109	0			0.609834	0.609834
16_76961175_77004779_DEL	0	1	2248	3607	0.925109	0			0.609834	0.609834
6_137959044_137959044_DUP	0	1	2248	3607	0.925109	0			0.609834	0.609834
6_137894701_137894701_DUP	0	1	2248	3607	0.925109	0			0.609834	0.609834
16_79144715_79200414_DEL	0	1	2248	3607	0.925109	0			0.609834	0.609834
16_81204081_81291642_DUP	0	1	2248	3607	0.925109	0			0.609834	0.609834
16_82164832_83664582_DUP	1	0	2247	3608	0.518619	inf			0.609834	0.609834
6_128311140_129589507_DUP	0	1	2248	3607	0.925109	0			0.609834	0.609834
6_141428384_142061620_DUP	0	1	2248	3607	0.925109	0			0.609834	0.609834
6_157739931_157956467_DUP	1	0	2247	3608	0.518619	inf			0.609834	0.609834
6_160148982_160322348_DUP	0	1	2248	3607	0.925109	0			0.609834	0.609834
16_18196549_18863882_DUP	0	1	2248	3607	0.925109	0			0.609834	0.609834
7_12789707_12857095_DEL	0	1	2248	3607	0.925109	0			0.609834	0.609834
15_100502494_100537660_DEL	0	1	2248	3607	0.925109	0			0.609834	0.609834
7_6550403_6639234_DEL	0	1	2248	3607	0.925109	0			0.609834	0.609834
16_1521556_1585892_DUP	0	1	2248	3607	0.925109	0			0.609834	0.609834
16_2919929_3301664_DUP	0	1	2248	3607	0.925109	0			0.609834	0.609834
16_2919929_3301664_DEL	0	1	2248	3607	0.925109	0			0.609834	0.609834
16_4002022_4065677_DUP	0	1	2248	3607	0.925109	0			0.609834	0.609834
16_4643452_4764117_DEL	0	1	2248	3607	0.925109	0			0.609834	0.609834
16_5578988_5623455_DEL	1	0	2247	3608	0.518619	inf			0.609834	0.609834
7_6051283_6223280_DUP	0	1	2248	3607	0.925109	0			0.609834	0.609834
9_139925751_139925751_DEL	1	0	2247	3608	0.518619	inf			0.609834	0.609834
7_3826879_3911995_DEL	1	0	2247	3608	0.518619	inf			0.609834	0.609834
7_2921306_2968361_DUP	0	1	2248	3607	0.925109	0			0.609834	0.609834
7_2204400_2377332_DEL	0	1	2248	3607	0.925109	0			0.609834	0.609834
7_2204400_2377332_DUP	1	0	2247	3608	0.518619	inf			0.609834	0.609834
16_8690594_8791426_DEL	1	0	2247	3608	0.518619	inf			0.609834	0.609834
7_1789243_1876081_DEL	0	1	2248	3607	0.925109	0			0.609834	0.609834
16_8862956_9000085_DUP	1	0	2247	3608	0.518619	inf			0.609834	0.609834
16_9253253_9347889_DUP	1	0	2247	3608	0.518619	inf			0.609834	0.609834
16_9515402_9566894_DEL	0	1	2248	3607	0.925109	0			0.609834	0.609834
6_170416288_170572741_DUP	0	1	2248	3607	0.925109	0			0.609834	0.609834
6_168324917_168324917_DUP	1	0	2247	3608	0.518619	inf			0.609834	0.609834
6_166702780_166830696_DUP	0	1	2248	3607	0.925109	0			0.609834	0.609834
14_74801578_74918903_DUP	0	1	2248	3607	0.925109	0			0.609834	0.609834
14_69377265_69438984_DEL	1	0	2247	3608	0.518619	inf			0.609834	0.609834
15_36196925_36474551_DUP	0	1	2248	3607	0.925109	0			0.609834	0.609834
7_135896926_135896926_DUP	0	1	2248	3607	0.925109	0			0.609834	0.609834
7_143166478_143216729_DUP	1	0	2247	3608	0.518619	inf			0.609834	0.609834
7_119643386_119922531_DUP	0	1	2248	3607	0.925109	0			0.609834	0.609834
7_107474189_107504376_DUP	0	1	2248	3607	0.925109	0			0.609834	0.609834
7_140031652_140108096_DEL	0	1	2248	3607	0.925109	0			0.609834	0.609834
14_35531754_35725094_DUP	0	1	2248	3607	0.925109	0			0.609834	0.609834
13_54739139_55570742_DEL	0	1	2248	3607	0.925109	0			0.609834	0.609834
7_108230456_108392688_DEL	0	1	2248	3607	0.925109	0			0.609834	0.609834
7_119536966_119631886_DUP	0	1	2248	3607	0.925109	0			0.609834	0.609834
14_32613062_32729020_DUP	0	1	2248	3607	0.925109	0			0.609834	0.609834
7_121841910_121927932_DUP	0	1	2248	3607	0.925109	0			0.609834	0.609834
7_126162920_126593924_DEL	0	1	2248	3607	0.925109	0			0.609834	0.609834
14_30532417_30706026_DEL	0	1	2248	3607	0.925109	0			0.609834	0.609834
9_139925542_139925542_DEL	1	0	2247	3608	0.518619	inf			0.609834	0.609834
7_109826826_109900921_DUP	0	1	2248	3607	0.925109	0			0.609834	0.609834
14_27803360_27880606_DUP	1	0	2247	3608	0.518619	inf			0.609834	0.609842
14_23154745_23259791_DUP	1	0	2247	3608	0.518619	inf			0.609834	0.609842
13_107372722_107706240_DEL	0	1	2248	3607	0.925109	0			0.609834	0.609842
14_22235578_22429926_DUP	0	1	2248	3607	0.925109	0			0.609834	0.609843
13_64908842_65054431_DEL	0	1	2248	3607	0.925109	0			0.609834	0.609854
14_21284705_21322261_DEL	1	0	2247	3608	0.518619	inf			0.609834	0.609856
13_65094772_65393723_DEL	0	1	2248	3607	0.925109	0			0.609834	0.609856
7_130653616_130753621_DEL	0	1	2248	3607	0.925109	0			0.609834	0.609864
7_133043996_133304716_DEL	0	1	2248	3607	0.925109	0			0.609834	0.609867
13_73882759_74181934_DUP	0	1	2248	3607	0.925109	0			0.609834	0.609889
13_71053976_71178412_DEL	0	1	2248	3607	0.925109	0			0.609834	0.609918
13_112989679_113054784_DUP	1	0	2247	3608	0.518619	inf			0.609834	0.609944
14_27889567_28080806_DUP	1	0	2247	3608	0.518619	inf			0.609834	0.609959
7_101350609_101501549_DUP	1	0	2247	3608	0.518619	inf			0.609834	0.609989
7_106851102_106973031_DEL	1	0	2247	3608	0.518619	inf			0.609834	0.610045
7_101138662_101172459_DUP	0	1	2248	3607	0.925109	0			0.609834	0.610093
14_61852291_61957000_DEL	0	1	2248	3607	0.925109	0			0.609834	0.610189
13_31735759_31872181_DUP	0	1	2248	3607	0.925109	0			0.609834	0.610307
7_151627616_151660298_DEL	0	1	2248	3607	0.925109	0			0.609834	0.610458
14_48447924_48526014_DEL	1	0	2247	3608	0.518619	inf			0.609834	0.610702
7_79495978_79644412_DUP	0	1	2248	3607	0.925109	0			0.609834	0.610919
7_122018945_122099546_DEL	0	1	2248	3607	0.925109	0			0.609834	0.611194
7_145976286_146138818_DEL	1	0	2247	3608	0.518619	inf			0.609834	0.611548
7_82465234_83714273_DUP	0	1	2248	3607	0.925109	0			0.609834	0.612101
13_32959236_33175434_DUP	0	1	2248	3607	0.925109	0			0.609834	0.612622
7_84845546_85149260_DEL	1	0	2247	3608	0.518619	inf			0.609834	0.613278
14_45019356_45161431_DEL	0	1	2248	3607	0.925109	0			0.609834	0.6141
13_87470908_87648657_DEL	0	1	2248	3607	0.925109	0			0.609834	0.614884
7_88096962_90153821_DUP	1	0	2247	3608	0.518619	inf			0.609834	0.615892
14_43474406_43949284_DUP	0	1	2248	3607	0.925109	0			0.609834	0.6169
7_95350860_95972345_DUP	0	1	2248	3607	0.925109	0			0.609834	0.618075
13_85920161_86043214_DEL	0	1	2248	3607	0.925109	0			0.609834	0.619484
14_44165448_44247741_DUP	0	1	2248	3607	0.925109	0			0.609834	0.621024
7_90594055_91149325_DUP	1	0	2247	3608	0.518619	inf			0.609834	0.622424
7_118745424_119502494_DUP	0	1	2248	3607	0.925109	0			0.609834	0.623967
7_121217473_121340319_DEL	0	1	2248	3607	0.925109	0			0.609834	0.625437
13_38756631_38996134_DUP	0	1	2248	3607	0.925109	0			0.609834	0.6271
18_63294237_64079691_DEL	1	3	2247	3605	0.912528	0.237922	0.0170522	3.31961	0.618003	0.628685
7_72745738_76637441_DUP	3	0	2245	3608	0.954594	inf			0.619182	0.630329
15_101669885_102157749_DUP	3	1	2245	3607	0.919774	4.54377	0.282191	73.1627	0.623896	0.631943
7_110527809_111831220_DUP	3	1	2245	3607	0.62905	2.8306	0.313106	25.5898	0.623896	0.633448
6_31360255_31451836_DEL	2	2	2246	3606	0.590003	0.982254	0.144595	6.67258	0.628733	0.635057
5_178731921_178933177_DUP	3	3	2245	3605	0.613877	2.28113	0.414868	12.5427	0.628941	0.636507
8_2290945_2584448_DUP	2	6	2246	3602	0.662832	0.515347	0.103976	2.55427	0.631739	0.637931
2_233215403_233315499_DEL	4	5	2244	3603	0.938021	1.82075	0.453426	7.31133	0.645529	0.63929
7_15399963_15509843_DUP	2	2	2246	3606	0.672507	2.66995	0.3756	18.9793	0.645901	0.640583
2_75164700_75233994_DUP	2	2	2246	3606	0.672507	2.66995	0.3756	18.9793	0.645901	0.641667
14_86924652_86977841_DEL	2	2	2246	3606	0.672507	2.66995	0.3756	18.9793	0.645901	0.642744
7_53471324_53583058_DEL	1	3	2247	3605	0.909017	0.88878	0.0923448	8.55413	0.645901	0.643835
6_161362549_161566405_DUP	1	3	2247	3605	0.909017	0.88878	0.0923448	8.55413	0.645901	0.644782
19_483488_521076_DUP	1	3	2247	3605	0.909017	0.88878	0.0923448	8.55413	0.645901	0.645651
12_5767174_6405578_DUP	1	3	2247	3605	0.909017	0.88878	0.0923448	8.55413	0.645901	0.646506
3_179070168_179272577_DUP	1	3	2247	3605	0.932725	0.241476	0.016136	3.6137	0.646735	0.647238
1_9318591_9400985_DUP	4	10	2244	3598	0.990018	0.617634	0.174454	2.18666	0.650406	0.647887
13_70635120_70950207_DEL	0	2	2248	3606	0.863719	0			0.651676	0.648492
16_80088896_80310222_DEL	0	2	2248	3606	0.863719	0			0.651676	0.649134
6_119728438_119949791_DEL	0	2	2248	3606	0.863719	0			0.651676	0.649647
16_76721960_76860426_DEL	1	1	2247	3607	0.376184	1.37413	0.116832	16.1621	0.651676	0.649993
1_146330584_147825662_DEL	1	1	2247	3607	0.875595	1.72605	0.0672285	44.3153	0.651676	0.650232
2_129864132_130777719_DUP	1	1	2247	3607	0.376184	1.37413	0.116832	16.1621	0.651676	0.650466
16_5404377_5492498_DUP	1	1	2247	3607	0.875595	1.72605	0.0672285	44.3153	0.651676	0.650629
2_78028556_78220806_DEL	1	1	2247	3607	0.875595	1.72605	0.0672285	44.3153	0.651676	0.650844
13_43465453_43537189_DUP	1	1	2247	3607	0.875595	1.72605	0.0672285	44.3153	0.651676	0.65103
1_209182651_210889806_DUP	1	1	2247	3607	0.875595	1.72605	0.0672285	44.3153	0.651676	0.651177
12_80500294_82430283_DEL	1	1	2247	3607	0.376184	1.37413	0.116832	16.1621	0.651676	0.651334
17_33687416_33756756_DEL	0	2	2248	3606	0.863719	0			0.651676	0.651477
17_34815551_36232526_DUP	0	2	2248	3606	0.863719	0			0.651676	0.651651
9_119058748_120243337_DEL	1	1	2247	3607	0.875595	1.72605	0.0672285	44.3153	0.651676	0.651798
10_9511933_9875398_DEL	0	2	2248	3606	0.863719	0			0.651676	0.651899
3_5278346_5389179_DEL	0	2	2248	3606	0.863719	0			0.651676	0.652017
12_16242177_16456822_DEL	0	2	2248	3606	0.863719	0			0.651676	0.652123
12_91372294_91479154_DEL	0	2	2248	3606	0.863719	0			0.651676	0.652272
12_7989403_8123777_DUP	1	1	2247	3607	0.875595	1.72605	0.0672285	44.3153	0.651676	0.652434
7_110463206_110517118_DUP	1	1	2247	3607	0.875595	1.72605	0.0672285	44.3153	0.651676	0.652616
7_109931329_110125420_DUP	1	1	2247	3607	0.875595	1.72605	0.0672285	44.3153	0.651676	0.652851
14_32121501_32568311_DUP	0	2	2248	3606	0.863719	0			0.651676	0.653053
6_26328097_26404958_DUP	0	2	2248	3606	0.863719	0			0.651676	0.653265
2_35090790_36048415_DEL	0	2	2248	3606	0.863719	0			0.651676	0.653557
2_156151355_156348905_DUP	0	2	2248	3606	0.863719	0			0.651676	0.653856
4_45923348_46975116_DUP	1	1	2247	3607	0.875595	1.72605	0.0672285	44.3153	0.651676	0.654164
1_54978948_55224773_DUP	0	2	2248	3606	0.863719	0			0.651676	0.65451
2_34778477_35085350_DEL	0	2	2248	3606	0.863719	0			0.651676	0.654797
10_58457011_59219022_DEL	1	1	2247	3607	0.376184	1.37413	0.116832	16.1621	0.651676	0.655061
12_16477314_16639102_DEL	1	1	2247	3607	0.376184	1.37413	0.116832	16.1621	0.651676	0.655383
9_2288647_2426100_DEL	0	2	2248	3606	0.863719	0			0.651676	0.655773
7_110129428_110443171_DUP	1	1	2247	3607	0.875595	1.72605	0.0672285	44.3153	0.651676	0.65606
4_21644188_21727549_DEL	1	0	2247	3608	0.927493	inf			0.658229	0.65629
7_47500360_47574318_DUP	1	0	2247	3608	0.927493	inf			0.658229	0.656533
8_109000339_109379743_DEL	0	1	2248	3607	0.512936	0			0.658229	0.656747
6_61931053_61931053_DUP	0	1	2248	3607	0.512936	0			0.658229	0.656919
5_142038583_142038583_DUP	1	0	2247	3608	0.927493	inf			0.658229	0.657136
5_11111713_11186685_DUP	1	0	2247	3608	0.927493	inf			0.658229	0.657324
5_12121629_12274892_DUP	1	0	2247	3608	0.927493	inf			0.658229	0.657442
7_104716497_104926129_DUP	1	0	2247	3608	0.927493	inf			0.658229	0.657549
8_3551805_3783762_DUP	1	0	2247	3608	0.927493	inf			0.658229	0.657643
4_32579461_32630801_DEL	0	1	2248	3607	0.512936	0			0.658229	0.657748
7_62140786_62837420_DUP	0	1	2248	3607	0.512936	0			0.658229	0.657841
7_143572286_143874190_DUP	1	0	2247	3608	0.927493	inf			0.658229	0.657952
5_123411626_123545499_DEL	1	0	2247	3608	0.927493	inf			0.658229	0.658014
5_122604925_122697892_DEL	1	0	2247	3608	0.927493	inf			0.658229	0.65807
8_108743227_108783667_DEL	1	0	2247	3608	0.927493	inf			0.658229	0.658111
7_144265616_144473459_DEL	1	0	2247	3608	0.927493	inf			0.658229	0.658142
7_84845546_85149260_DUP	1	0	2247	3608	0.927493	inf			0.658229	0.658164
7_81151903_82448100_DEL	1	0	2247	3608	0.927493	inf			0.658229	0.658183
8_1585661_1721090_DUP	1	0	2247	3608	0.927493	inf			0.658229	0.658196
6_131624690_132218132_DEL	1	0	2247	3608	0.927493	inf			0.658229	0.658203
7_146586139_146753732_DEL	1	0	2247	3608	0.927493	inf			0.658229	0.658205
6_131021812_131114806_DEL	1	0	2247	3608	0.927493	inf			0.658229	0.65821
7_72745738_76637441_DEL	0	1	2248	3607	0.512936	0			0.658229	0.658216
7_90594055_91149325_DEL	1	0	2247	3608	0.927493	inf			0.658229	0.658223
7_47119768_47206621_DUP	1	0	2247	3608	0.927493	inf			0.658229	0.658223
4_184281471_184375868_DUP	1	0	2247	3608	0.927493	inf			0.658229	0.658223
5_173168142_173266547_DEL	1	0	2247	3608	0.927493	inf			0.658229	0.658223
6_76698468_77000409_DEL	1	0	2247	3608	0.927493	inf			0.658229	0.658223
5_78653323_78747114_DUP	1	0	2247	3608	0.927493	inf			0.658229	0.658229
7_122130281_122264411_DEL	0	1	2248	3607	0.512936	0			0.658229	0.658229
4_133884621_133961722_DEL	1	0	2247	3608	0.927493	inf			0.658229	0.658229
8_11705290_11856903_DUP	1	0	2247	3608	0.927493	inf			0.658229	0.658229
9_32203380_32305904_DUP	1	0	2247	3608	0.927493	inf			0.658229	0.658229
8_10086846_10212969_DUP	0	1	2248	3607	0.512936	0			0.658229	0.658229
3_172624328_173523801_DEL	0	1	2248	3607	0.512936	0			0.658229	0.658229
4_120049109_120214277_DEL	1	0	2247	3608	0.927493	inf			0.658229	0.658229
5_53348822_53755199_DUP	0	1	2248	3607	0.512936	0			0.658229	0.658229
7_22007118_22064637_DEL	0	1	2248	3607	0.512936	0			0.658229	0.658229
5_25711728_26072691_DEL	1	0	2247	3608	0.927493	inf			0.658229	0.658229
6_93343207_93437869_DUP	0	1	2248	3607	0.512936	0			0.658229	0.658229
6_11158816_12050839_DUP	1	0	2247	3608	0.927493	inf			0.658229	0.658229
4_182282618_182438604_DEL	1	0	2247	3608	0.927493	inf			0.658229	0.658229
5_33139201_34119847_DEL	1	0	2247	3608	0.927493	inf			0.658229	0.658229
4_7701563_7883943_DEL	0	1	2248	3607	0.512936	0			0.658229	0.658229
7_133749118_133848293_DEL	1	0	2247	3608	0.927493	inf			0.658229	0.658229
3_156215388_156682397_DUP	1	0	2247	3608	0.927493	inf			0.658229	0.658229
6_159029043_159090208_DEL	1	0	2247	3608	0.927493	inf			0.658229	0.658229
8_18484094_18694433_DEL	1	0	2247	3608	0.927493	inf			0.658229	0.658229
7_135386787_135488621_DUP	1	0	2247	3608	0.927493	inf			0.658229	0.658229
6_154815891_155051600_DUP	1	0	2247	3608	0.927493	inf			0.658229	0.658229
8_78601773_78742972_DEL	1	0	2247	3608	0.927493	inf			0.658229	0.658229
7_1144527_1247934_DEL	1	0	2247	3608	0.927493	inf			0.658229	0.658229
4_53789685_54257660_DUP	1	0	2247	3608	0.927493	inf			0.658229	0.658229
1_881627_919927_DUP	1	0	2247	3608	0.927493	inf			0.658229	0.658229
12_9713456_9878047_DUP	1	0	2247	3608	0.927493	inf			0.658229	0.658229
10_78835356_79538774_DUP	1	0	2247	3608	0.927493	inf			0.658229	0.658229
13_32352714_32526778_DUP	1	0	2247	3608	0.927493	inf			0.658229	0.658229
11_103528873_103601376_DUP	1	0	2247	3608	0.927493	inf			0.658229	0.658229
2_140781916_140797961_DEL	1	0	2247	3608	0.927493	inf			0.658229	0.658229
2_140807488_140905471_DEL	1	0	2247	3608	0.927493	inf			0.658229	0.658229
19_54749060_54847587_DEL	0	1	2248	3607	0.512936	0			0.658229	0.658229
2_154410388_154936872_DEL	0	1	2248	3607	0.512936	0			0.658229	0.658229
17_61710010_61925498_DUP	1	0	2247	3608	0.927493	inf			0.658229	0.658229
2_168425549_168576763_DEL	1	0	2247	3608	0.927493	inf			0.658229	0.658229
13_44039990_44183288_DUP	0	1	2248	3607	0.512936	0			0.658229	0.658229
2_184350162_184502493_DEL	1	0	2247	3608	0.927493	inf			0.658229	0.658229
2_193882856_195630511_DUP	1	0	2247	3608	0.927493	inf			0.658229	0.658229
19_53033927_53433779_DUP	1	0	2247	3608	0.927493	inf			0.658229	0.658229
11_103334643_103461459_DUP	1	0	2247	3608	0.927493	inf			0.658229	0.658229
3_94373578_94786646_DUP	0	1	2248	3607	0.512936	0			0.658229	0.658229
12_53384060_53518073_DUP	1	0	2247	3608	0.927493	inf			0.658229	0.658229
2_48694790_48790348_DUP	1	0	2247	3608	0.927493	inf			0.658229	0.658229
10_34935481_35161685_DUP	1	0	2247	3608	0.927493	inf			0.658229	0.658229
2_220285309_220342776_DUP	1	0	2247	3608	0.927493	inf			0.658229	0.658229
2_226946435_227078645_DEL	1	0	2247	3608	0.927493	inf			0.658229	0.658229
19_7218382_7256028_DUP	1	0	2247	3608	0.927493	inf			0.658229	0.658229
19_6887062_6887062_DUP	0	1	2248	3607	0.512936	0			0.658229	0.658229
15_78400640_79019578_DEL	1	0	2247	3608	0.927493	inf			0.658229	0.658229
19_2512038_2603515_DUP	1	0	2247	3608	0.927493	inf			0.658229	0.658229
10_27599357_27637909_DEL	0	1	2248	3607	0.512936	0			0.658229	0.658229
19_2003029_2058244_DEL	1	0	2247	3608	0.927493	inf			0.658229	0.658229
20_36807015_36994821_DEL	1	0	2247	3608	0.927493	inf			0.658229	0.658229
17_67448102_67739667_DUP	1	0	2247	3608	0.927493	inf			0.658229	0.658229
2_196824142_197529542_DEL	1	0	2247	3608	0.927493	inf			0.658229	0.658229
20_59853938_60043365_DEL	1	0	2247	3608	0.927493	inf			0.658229	0.658229
10_83874919_84075164_DEL	0	1	2248	3607	0.512936	0			0.658229	0.658229
10_87251821_87300383_DUP	1	0	2247	3608	0.927493	inf			0.658229	0.658229
11_35602337_35602337_DEL	0	1	2248	3607	0.512936	0			0.658229	0.658229
16_63301476_63461623_DEL	1	0	2247	3608	0.927493	inf			0.658229	0.658229
2_41876799_41947265_DEL	1	0	2247	3608	0.927493	inf			0.658229	0.658229
2_49548375_50871418_DEL	1	0	2247	3608	0.927493	inf			0.658229	0.658229
11_32133448_32302799_DUP	1	0	2247	3608	0.927493	inf			0.658229	0.658229
2_40288568_40454348_DUP	1	0	2247	3608	0.927493	inf			0.658229	0.658229
11_28790003_28790003_DEL	1	0	2247	3608	0.927493	inf			0.658229	0.658229
2_40107756_40231647_DEL	1	0	2247	3608	0.927493	inf			0.658229	0.658229
2_36354424_36569014_DEL	0	1	2248	3607	0.512936	0			0.658229	0.658229
11_27014032_27226591_DUP	0	1	2248	3607	0.512936	0			0.658229	0.658229
13_20588537_20695554_DUP	1	0	2247	3608	0.927493	inf			0.658229	0.658229
11_81192396_81241298_DEL	1	0	2247	3608	0.927493	inf			0.658229	0.658229
16_21601201_21601201_DUP	1	0	2247	3608	0.927493	inf			0.658229	0.658229
13_32267929_32345208_DUP	1	0	2247	3608	0.927493	inf			0.658229	0.658229
11_23547384_24211382_DUP	0	1	2248	3607	0.512936	0			0.658229	0.658229
11_11044357_11084001_DEL	1	0	2247	3608	0.927493	inf			0.658229	0.658229
2_83390541_83485980_DEL	1	0	2247	3608	0.927493	inf			0.658229	0.658229
10_128526023_128597733_DUP	1	0	2247	3608	0.927493	inf			0.658229	0.658229
10_112918176_112999617_DEL	1	0	2247	3608	0.927493	inf			0.658229	0.658229
2_104983267_105201660_DUP	1	0	2247	3608	0.927493	inf			0.658229	0.658229
16_11607797_11650325_DUP	1	0	2247	3608	0.927493	inf			0.658229	0.658229
16_10574796_10732319_DEL	0	1	2248	3607	0.512936	0			0.658229	0.658229
16_8690594_8791426_DUP	1	0	2247	3608	0.927493	inf			0.658229	0.658229
10_110598443_110888212_DEL	1	0	2247	3608	0.927493	inf			0.658229	0.658229
16_6158964_6912595_DUP	1	0	2247	3608	0.927493	inf			0.658229	0.658229
13_32158849_32249677_DUP	1	0	2247	3608	0.927493	inf			0.658229	0.658229
16_1521556_1585892_DEL	1	0	2247	3608	0.927493	inf			0.658229	0.658229
2_123412546_123608935_DEL	1	0	2247	3608	0.927493	inf			0.658229	0.658229
16_19010838_19127347_DUP	1	0	2247	3608	0.927493	inf			0.658229	0.658229
13_105533072_105896297_DEL	1	0	2247	3608	0.927493	inf			0.658229	0.658229
2_48017845_48198145_DUP	1	0	2247	3608	0.927493	inf			0.658229	0.658229
3_19657439_19959756_DEL	0	1	2248	3607	0.512936	0			0.658229	0.658232
1_67689608_67788565_DUP	1	0	2247	3608	0.927493	inf			0.658229	0.658232
1_161955758_162014632_DUP	1	0	2247	3608	0.927493	inf			0.658229	0.658232
12_34809730_34843869_DUP	0	1	2248	3607	0.512936	0			0.658229	0.658234
22_22318346_22563845_DEL	1	0	2247	3608	0.927493	inf			0.658229	0.658234
1_73443365_73890589_DEL	0	1	2248	3607	0.512936	0			0.658229	0.658234
3_22564012_23034520_DUP	1	0	2247	3608	0.927493	inf			0.658229	0.658239
1_90847063_91053707_DUP	0	1	2248	3607	0.512936	0			0.658229	0.65824
1_60274050_60619324_DUP	0	1	2248	3607	0.512936	0			0.658229	0.658256
18_42085122_42209961_DUP	1	0	2247	3608	0.927493	inf			0.658229	0.658258
14_20416848_20417653_DUP	1	0	2247	3608	0.927493	inf			0.658229	0.658283
18_57828637_57974920_DEL	0	1	2248	3607	0.512936	0			0.658229	0.658292
14_102948852_103115008_DUP	1	0	2247	3608	0.927493	inf			0.658229	0.658318
12_575633_612886_DEL	1	0	2247	3608	0.927493	inf			0.658229	0.658369
14_28467299_28516404_DEL	0	1	2248	3607	0.512936	0			0.658229	0.658416
18_61692293_62106616_DUP	0	1	2248	3607	0.512936	0			0.658229	0.658451
18_62279611_62485731_DUP	0	1	2248	3607	0.512936	0			0.658229	0.658513
14_35100835_35425457_DUP	1	0	2247	3608	0.927493	inf			0.658229	0.658594
18_2978535_3059507_DEL	1	0	2247	3608	0.927493	inf			0.658229	0.658733
12_1075536_1848264_DEL	1	0	2247	3608	0.927493	inf			0.658229	0.658989
18_28650804_28711519_DEL	0	1	2248	3607	0.512936	0			0.658229	0.659237
18_28968371_29046967_DUP	1	0	2247	3608	0.927493	inf			0.658229	0.65954
1_3041632_3083712_DUP	0	1	2248	3607	0.512936	0			0.658229	0.65981
12_3375228_3405864_DUP	0	1	2248	3607	0.512936	0			0.658229	0.660143
21_37120987_37291431_DEL	1	0	2247	3608	0.927493	inf			0.658229	0.660623
3_65990618_66119702_DUP	1	0	2247	3608	0.927493	inf			0.658229	0.661123
21_24415880_24469110_DEL	1	0	2247	3608	0.927493	inf			0.658229	0.661776
14_44829276_44903433_DUP	1	0	2247	3608	0.927493	inf			0.658229	0.662438
14_40425105_40591259_DEL	1	0	2247	3608	0.927493	inf			0.658229	0.663198
12_16815287_16897233_DUP	1	0	2247	3608	0.927493	inf			0.658229	0.663971
13_107372722_107706240_DUP	1	0	2247	3608	0.927493	inf			0.658229	0.664908
14_44829276_44903433_DEL	1	0	2247	3608	0.927493	inf			0.658229	0.665716
13_20110195_20448957_DUP	2	3	2246	3605	0.844864	1.05938	0.1259	8.91408	0.659402	0.666667
16_17851431_18165043_DUP	1	2	2247	3606	0.912976	0.808078	0.066262	9.85467	0.65955	0.667706
17_77188549_77234671_DEL	2	3	2246	3605	0.937105	0.939239	0.103436	8.52864	0.660793	0.668765
7_100968363_101131052_DUP	3	11	2245	3597	0.67386	0.620768	0.170207	2.26402	0.665136	0.669773
15_22759530_23279684_DUP	11	14	2237	3594	0.857588	1.35018	0.563934	3.23262	0.669423	0.670817
11_28726454_28786347_DEL	3	1	2245	3607	0.935956	3.11379	0.281059	34.497	0.676227	0.67191
7_9952849_11621741_DEL	1	2	2247	3606	0.848063	1.33366	0.120801	14.7238	0.679907	0.672872
6_6819348_7478803_DUP	0	3	2248	3605	0.949552	0			0.679907	0.673697
8_53406255_53939511_DUP	1	2	2247	3606	0.848063	1.33366	0.120801	14.7238	0.679907	0.674341
6_31360255_31451836_DUP	1	2	2247	3606	0.848063	1.33366	0.120801	14.7238	0.679907	0.674997
10_112517536_112589343_DEL	1	2	2247	3606	0.848063	1.33366	0.120801	14.7238	0.679907	0.675671
5_111239761_111339780_DEL	1	2	2247	3606	0.848063	1.33366	0.120801	14.7238	0.679907	0.676347
3_137250044_137346929_DUP	0	3	2248	3605	0.949552	0			0.679907	0.67684
3_52622086_53822913_DUP	1	2	2247	3606	0.848063	1.33366	0.120801	14.7238	0.679907	0.677303
2_1119669_1843343_DEL	1	2	2247	3606	0.848063	1.33366	0.120801	14.7238	0.679907	0.677736
11_90940537_91036813_DEL	1	2	2247	3606	0.848063	1.33366	0.120801	14.7238	0.679907	0.678175
7_71147866_71459522_DUP	1	2	2247	3606	0.848063	1.33366	0.120801	14.7238	0.679907	0.678452
9_16091817_16136208_DEL	1	2	2247	3606	0.848063	1.33366	0.120801	14.7238	0.679907	0.678743
16_21625020_21742542_DEL	0	3	2248	3605	0.949552	0			0.679907	0.679059
9_12942764_13033449_DEL	0	3	2248	3605	0.949552	0			0.679907	0.679246
17_284614_831667_DUP	1	2	2247	3606	0.848063	1.33366	0.120801	14.7238	0.679907	0.679456
2_61002427_61099420_DUP	1	2	2247	3606	0.848063	1.33366	0.120801	14.7238	0.679907	0.679608
6_137901443_137956465_DUP	0	3	2248	3605	0.949552	0			0.679907	0.679695
17_6758671_6862592_DEL	1	2	2247	3606	0.848063	1.33366	0.120801	14.7238	0.679907	0.679759
18_74432392_74470555_DUP	0	3	2248	3605	0.949552	0			0.679907	0.679838
4_84558656_84604639_DEL	0	3	2248	3605	0.949552	0			0.679907	0.679919
7_110463206_110517118_DEL	0	3	2248	3605	0.949552	0			0.679907	0.680015
1_240806081_241571106_DUP	1	2	2247	3606	0.848063	1.33366	0.120801	14.7238	0.679907	0.680105
4_59284649_59907528_DEL	0	3	2248	3605	0.949552	0			0.679907	0.680292
1_247302002_248435253_DUP	1	2	2247	3606	0.848063	1.33366	0.120801	14.7238	0.679907	0.680389
1_227945366_228174528_DUP	0	3	2248	3605	0.949552	0			0.679907	0.680615
9_104986390_105047696_DEL	1	2	2247	3606	0.848063	1.33366	0.120801	14.7238	0.679907	0.680878
5_175562904_175625948_DEL	0	3	2248	3605	0.949552	0			0.679907	0.681174
21_32949556_33023305_DEL	1	2	2247	3606	0.848063	1.33366	0.120801	14.7238	0.679907	0.681512
10_27099497_27586972_DUP	1	2	2247	3606	0.848063	1.33366	0.120801	14.7238	0.679907	0.681907
15_87882097_88029679_DEL	0	3	2248	3605	0.949552	0			0.679907	0.68231
4_90320570_94439482_DUP	1	2	2247	3606	0.848063	1.33366	0.120801	14.7238	0.679907	0.682891
13_64089258_64650413_DUP	1	2	2247	3606	0.848063	1.33366	0.120801	14.7238	0.679907	0.683462
15_93798732_95402285_DEL	0	3	2248	3605	0.949552	0			0.679907	0.68419
4_28812609_28863159_DUP	1	2	2247	3606	0.848063	1.33366	0.120801	14.7238	0.679907	0.685099
8_83672742_84002117_DUP	1	2	2247	3606	0.848063	1.33366	0.120801	14.7238	0.679907	0.68594
2_216998661_217105695_DUP	1	2	2247	3606	0.848063	1.33366	0.120801	14.7238	0.679907	0.687126
10_6677767_6894846_DEL	0	3	2248	3605	0.949552	0			0.679907	0.688409
8_10451585_10501771_DEL	1	2	2247	3606	0.848063	1.33366	0.120801	14.7238	0.679907	0.689745
22_23921427_23979219_DUP	0	3	2248	3605	0.949552	0			0.679907	0.691194
2_851144_1101127_DUP	2	7	2246	3601	0.998348	0.495417	0.0855279	2.86968	0.689339	0.692833
3_143757190_145797723_DUP	2	0	2246	3608	0.937063	inf			0.691663	0.694528
14_80468673_80570671_DEL	2	0	2246	3608	0.937063	inf			0.691663	0.696363
7_9767725_9905545_DUP	2	0	2246	3608	0.937063	inf			0.691663	0.698459
14_27396676_27635537_DUP	2	0	2246	3608	0.937063	inf			0.691663	0.700492
21_18718170_19087620_DUP	2	0	2246	3608	0.937063	inf			0.691663	0.702843
7_82465234_83714273_DEL	2	0	2246	3608	0.937063	inf			0.691663	0.705205
13_111692994_111752200_DUP	2	4	2246	3604	0.995488	0.939524	0.138132	6.39032	0.691877	0.707808
1_40183242_40291192_DUP	2	4	2246	3604	0.995488	0.939524	0.138132	6.39032	0.691877	0.710398
18_7247606_7935857_DUP	3	4	2245	3604	0.883988	0.981648	0.179671	5.36333	0.69402	0.713089
2_133759852_140700670_DEL	3	4	2245	3604	0.885701	0.977346	0.147876	6.45952	0.69402	0.715871
8_56723557_56876219_DUP	4	3	2244	3605	0.997038	2.19319	0.376184	12.7865	0.69402	0.718461
12_129225749_129266496_DUP	2	3	2246	3605	0.719572	1.1507	0.143763	9.21039	0.718531	0.720939
11_85431756_85465576_DEL	1	4	2247	3604	0.583501	0.453237	0.0576778	3.56158	0.718531	0.723506
16_77169104_78763794_DEL	1	5	2247	3603	0.778542	0.34521	0.0296973	4.01282	0.724196	0.72576
11_25156627_25593848_DEL	2	5	2246	3603	0.898452	1.0668	0.206646	5.50728	0.728244	0.728089
5_17642139_17830266_DEL	3	7	2245	3601	0.823734	0.598648	0.139192	2.57471	0.729518	0.730205
22_49203503_49837653_DUP	4	6	2244	3602	0.634317	0.999452	0.25533	3.91221	0.730691	0.732508
10_81682742_81963144_DUP	3	11	2245	3597	0.833882	0.641056	0.168747	2.43532	0.732143	0.734532
10_68199518_68336295_DEL	3	4	2245	3604	0.442705	1.05272	0.236627	4.6834	0.740304	0.736238
7_153667519_153751348_DUP	2	1	2246	3607	0.872972	3.76105	0.256271	55.1974	0.745822	0.737823
19_51766397_52005986_DUP	1	2	2247	3606	0.995414	0.545833	0.0229315	12.9924	0.745822	0.739277
20_29822571_30735282_DUP	2	1	2246	3607	0.872972	3.76105	0.256271	55.1974	0.745822	0.740573
13_85456040_85510190_DEL	1	2	2247	3606	0.995414	0.545833	0.0229315	12.9924	0.745822	0.741753
7_153906742_153970767_DEL	1	2	2247	3606	0.995414	0.545833	0.0229315	12.9924	0.745822	0.742854
7_149963025_150399714_DUP	2	1	2246	3607	0.872972	3.76105	0.256271	55.1974	0.745822	0.743902
6_147922185_148682423_DUP	2	1	2246	3607	0.872972	3.76105	0.256271	55.1974	0.745822	0.74497
9_74103833_74363668_DUP	1	2	2247	3606	0.389092	0.745851	0.0851506	6.53306	0.745822	0.746027
7_88096962_90153821_DEL	1	2	2247	3606	0.995414	0.545833	0.0229315	12.9924	0.745822	0.746856
2_140712667_140771444_DEL	1	2	2247	3606	0.995414	0.545833	0.0229315	12.9924	0.745822	0.747794
9_73718746_73937299_DUP	1	2	2247	3606	0.389092	0.745851	0.0851506	6.53306	0.745822	0.748587
21_24131095_24265659_DUP	2	1	2246	3607	0.872972	3.76105	0.256271	55.1974	0.745822	0.749329
4_62594419_63345570_DUP	2	1	2246	3607	0.872972	3.76105	0.256271	55.1974	0.745822	0.750045
15_92688981_93071857_DUP	2	1	2246	3607	0.455321	2.77986	0.266032	29.0477	0.748317	0.750837
10_27642191_27703356_DEL	2	2	2246	3606	0.302939	0.832142	0.130613	5.30163	0.752378	0.751663
15_71631173_71801041_DEL	0	2	2248	3606	0.937573	0			0.759733	0.752453
15_62875398_63066806_DEL	1	1	2247	3607	0.78286	2.08647	0.0984538	44.2173	0.759733	0.75325
20_41255249_41476399_DEL	1	1	2247	3607	0.78286	2.08647	0.0984538	44.2173	0.759733	0.753951
16_21956457_22414463_DUP	1	1	2247	3607	0.78286	2.08647	0.0984538	44.2173	0.759733	0.754657
6_103714206_104583607_DEL	1	1	2247	3607	0.446206	1.68756	0.130214	21.8704	0.759733	0.755283
7_125048089_125361627_DEL	0	2	2248	3606	0.937573	0			0.759733	0.7559
13_67258432_67376347_DEL	1	1	2247	3607	0.78286	2.08647	0.0984538	44.2173	0.759733	0.7566
1_74051422_74791954_DUP	1	1	2247	3607	0.78286	2.08647	0.0984538	44.2173	0.759733	0.75717
15_88033667_88129327_DEL	0	2	2248	3606	0.937573	0			0.759733	0.757688
7_141653637_142032983_DUP	1	1	2247	3607	0.78286	2.08647	0.0984538	44.2173	0.759733	0.758195
9_13045827_13120380_DEL	0	2	2248	3606	0.937573	0			0.759733	0.75867
2_110852875_110983320_DEL	1	1	2247	3607	0.446206	1.68756	0.130214	21.8704	0.759733	0.75914
2_51131195_51296045_DEL	1	1	2247	3607	0.78286	2.08647	0.0984538	44.2173	0.759733	0.759563
8_3551805_3783762_DEL	0	2	2248	3606	0.937573	0			0.759733	0.75999
17_41448680_41592920_DUP	0	2	2248	3606	0.937573	0			0.759733	0.760483
2_233215403_233315499_DUP	1	1	2247	3607	0.78286	2.08647	0.0984538	44.2173	0.759733	0.760867
16_825255_1231586_DUP	1	1	2247	3607	0.446206	1.68756	0.130214	21.8704	0.759733	0.761389
10_1581728_1989186_DUP	0	2	2248	3606	0.937573	0			0.759733	0.76183
4_33895298_34097273_DEL	0	2	2248	3606	0.937573	0			0.759733	0.762359
7_15399963_15509843_DEL	1	1	2247	3607	0.78286	2.08647	0.0984538	44.2173	0.759733	0.76285
13_23524030_24927971_DUP	1	1	2247	3607	0.78286	2.08647	0.0984538	44.2173	0.759733	0.763544
12_1075536_1848264_DUP	0	2	2248	3606	0.937573	0			0.759733	0.764177
16_6924915_7745364_DUP	2	2	2246	3606	0.969091	1.40886	0.12451	15.9415	0.764493	0.764867
9_6695472_6910916_DUP	1	3	2247	3605	0.585279	0.377279	0.0360803	3.94507	0.764493	0.765574
10_45221793_45321852_DUP	5	5	2243	3603	0.834563	1.02554	0.276067	3.80973	0.765394	0.766311
6_142073541_142236407_DEL	1	4	2247	3604	0.605514	0.47805	0.0606974	3.7651	0.769589	0.76724
7_70311982_70590260_DUP	1	4	2247	3604	0.964277	0.272917	0.015227	4.89153	0.769589	0.768199
3_20042834_20116077_DUP	2	3	2246	3605	0.987959	1.25303	0.166688	9.41924	0.769589	0.769132
1_145383239_145738979_DUP	2	3	2246	3605	0.987959	1.25303	0.166688	9.41924	0.769589	0.770139
15_100385477_100499365_DEL	2	3	2246	3605	0.987959	1.25303	0.166688	9.41924	0.769589	0.77113
2_77237424_77305906_DEL	2	3	2246	3605	0.315565	1.1659	0.217726	6.24326	0.769589	0.772239
2_50880025_50952363_DEL	3	3	2245	3605	0.986549	1.15343	0.185622	7.16728	0.772863	0.773175
1_12342599_13186871_DUP	3	6	2245	3602	0.420045	1.05622	0.276289	4.03777	0.774226	0.774237
12_5544994_5670501_DUP	3	6	2245	3602	0.420045	1.05622	0.276289	4.03777	0.774226	0.775389
3_5391833_5435957_DEL	2	6	2246	3602	0.943752	0.541174	0.0927163	3.15876	0.774349	0.776472
11_54847856_56009243_DUP	2	5	2246	3603	0.879226	0.878424	0.151725	5.08571	0.780339	0.777635
3_21254021_21345104_DUP	3	2	2245	3606	0.792942	2.126	0.307449	14.7012	0.780664	0.778929
22_18889969_21461607_DEL	3	2	2245	3606	0.090931	1.69893	0.333838	8.64598	0.780664	0.78014
12_52689168_52777513_DUP	3	2	2245	3606	0.980742	2.4264	0.295353	19.9335	0.782881	0.78151
11_83979308_84620053_DEL	3	2	2245	3606	0.980742	2.4264	0.295353	19.9335	0.782881	0.782943
9_529916_884477_DUP	3	2	2245	3606	0.980742	2.4264	0.295353	19.9335	0.782881	0.784446
3_59705954_61022160_DUP	2	2	2246	3606	0.744594	2.37792	0.304849	18.5486	0.784305	0.786058
18_65256173_65680717_DEL	2	2	2246	3606	0.744594	2.37792	0.304849	18.5486	0.784305	0.787849
9_17585896_17633023_DUP	1	3	2247	3605	0.75187	0.69549	0.059695	8.10298	0.784305	0.789604
5_18566841_19272015_DEL	1	3	2247	3605	0.821033	0.744698	0.0819588	6.76652	0.784305	0.791483
1_188826462_189705795_DEL	1	3	2247	3605	0.936081	0.381149	0.0347813	4.17678	0.786952	0.793473
6_140676823_141407819_DUP	2	2	2246	3606	0.776343	1.29699	0.166972	10.0746	0.786952	0.795644
19_52272131_52617369_DUP	6	6	2242	3602	0.722348	1.3997	0.431203	4.5435	0.788209	0.797674
22_22318346_22563845_DUP	4	5	2244	3603	0.9793	1.63145	0.38438	6.9245	0.791303	0.799795
11_60528162_60625899_DEL	3	6	2245	3602	0.93992	0.913979	0.18851	4.43138	0.791303	0.802182
22_49840474_50002290_DUP	4	3	2244	3605	0.589936	1.65571	0.346971	7.90089	0.796185	0.804473
6_159568753_160046257_DUP	3	3	2245	3605	0.780931	1.16509	0.212977	6.37361	0.800957	0.806985
5_6022683_6136714_DEL	2	4	2246	3604	0.788794	0.794535	0.105686	5.97322	0.804891	0.809146
17_64413396_64482151_DEL	2	4	2246	3604	0.788794	0.794535	0.105686	5.97322	0.804891	0.811479
8_4449278_6521838_DUP	4	6	2244	3602	0.460189	1.06777	0.302191	3.77291	0.810864	0.813698
16_17851431_18165043_DEL	3	4	2245	3604	0.996482	1.21271	0.206438	7.12398	0.821216	0.816286
16_29627349_30199713_DEL	1	2	2247	3606	0.86751	0.304551	0.0209381	4.42978	0.821311	0.818927
5_12510729_12867030_DEL	1	2	2247	3606	0.102916	0.517799	0.069419	3.86229	0.821311	0.821748
5_142000535_142033695_DUP	2	1	2246	3607	0.996196	2.18333	0.090045	52.9396	0.821311	0.824344
14_42971788_43290584_DEL	1	2	2247	3606	0.86751	0.304551	0.0209381	4.42978	0.821311	0.827175
4_189260335_189794335_DEL	3	2	2245	3606	0.383015	1.21496	0.223441	6.60637	0.823199	0.829977
16_6158964_6912595_DEL	2	5	2246	3603	0.389394	0.632291	0.129539	3.08627	0.835882	0.832666
2_50959683_51109076_DEL	1	2	2247	3606	0.925068	0.586299	0.0454524	7.56276	0.839696	0.835378
18_65695878_68741416_DEL	1	3	2247	3605	0.485538	0.456059	0.0485561	4.2835	0.846401	0.838303
7_125371980_125739894_DEL	1	3	2247	3605	0.997783	0.304918	0.0173487	5.35919	0.846401	0.841162
12_19991869_20094524_DEL	3	2	2245	3606	0.848876	1.86674	0.283508	12.2915	0.853652	0.844158
7_15054804_15154665_DEL	3	2	2245	3606	0.848876	1.86674	0.283508	12.2915	0.853652	0.84691
7_110527809_111831220_DEL	11	22	2237	3586	0.361101	0.868098	0.408868	1.84312	0.854344	0.849965
7_154908212_155019546_DUP	3	4	2245	3604	0.973141	0.791073	0.131089	4.77384	0.85871	0.852777
14_20347202_20416499_DUP	4	3	2244	3605	0.476729	1.21729	0.240848	6.15243	0.864247	0.855597
16_15064134_16305355_DUP	3	7	2245	3601	0.811998	0.701331	0.173871	2.82891	0.864325	0.858285
4_180887158_180942572_DEL	3	3	2245	3605	0.729565	1.64531	0.315145	8.58984	0.867917	0.861207
1_146330584_147825662_DUP	1	3	2247	3605	0.732889	0.676552	0.0772155	5.92786	0.868099	0.863701
4_90320570_94439482_DEL	2	2	2246	3606	0.359588	1.81422	0.286121	11.5036	0.868099	0.866044
6_161817691_163233409_DEL	5	11	2243	3597	0.464567	0.941883	0.327327	2.71027	0.871767	0.868459
13_94673189_97520107_DUP	3	3	2245	3605	0.979412	1.82894	0.295078	11.3361	0.873864	0.870799
22_49840474_50002290_DEL	3	5	2245	3603	0.794118	0.833922	0.178056	3.90565	0.874981	0.872965
19_20831755_20959563_DUP	3	5	2245	3603	0.909275	0.816292	0.158481	4.20449	0.874981	0.874991
2_231183786_231258450_DUP	2	0	2246	3608	0.954842	inf			0.882583	0.87688
4_38916631_38976583_DEL	2	0	2246	3608	0.954842	inf			0.882583	0.878526
9_118456851_118592791_DEL	2	0	2246	3608	0.954842	inf			0.882583	0.880153
16_29627349_30199713_DUP	2	0	2246	3608	0.954842	inf			0.882583	0.881417
20_41182001_41240080_DEL	3	4	2245	3604	0.763759	1.62041	0.320722	8.1869	0.885073	0.882768
10_52008748_52160862_DUP	5	7	2243	3601	0.346918	1.29249	0.409382	4.08059	0.887678	0.88395
16_59718238_59935397_DUP	0	1	2248	3607	0.797995	0			0.889126	0.884905
16_16633572_16675862_DUP	0	1	2248	3607	0.797995	0			0.889126	0.885713
13_20486123_20572751_DUP	1	0	2247	3608	0.709245	inf			0.889126	0.88647
6_109155545_109417175_DEL	1	0	2247	3608	0.709245	inf			0.889126	0.887039
14_50769649_51317820_DUP	1	0	2247	3608	0.709245	inf			0.889126	0.887509
17_9329109_9445259_DEL	0	1	2248	3607	0.797995	0			0.889126	0.887954
7_105930628_106221448_DUP	0	1	2248	3607	0.797995	0			0.889126	0.888257
12_90993986_91045622_DEL	1	0	2247	3608	0.709245	inf			0.889126	0.888499
16_71997789_72076995_DEL	0	1	2248	3607	0.797995	0			0.889126	0.888676
14_79492739_79599274_DEL	0	1	2248	3607	0.797995	0			0.889126	0.888845
15_97828312_97914283_DEL	0	1	2248	3607	0.797995	0			0.889126	0.888943
15_65562281_65661868_DUP	0	1	2248	3607	0.797995	0			0.889126	0.889003
15_97534176_97628251_DUP	0	1	2248	3607	0.797995	0			0.889126	0.889049
12_63749816_63852162_DUP	1	0	2247	3608	0.709245	inf			0.889126	0.88909
16_71284193_71362644_DUP	0	1	2248	3607	0.797995	0			0.889126	0.889094
13_81612320_81683884_DUP	1	0	2247	3608	0.709245	inf			0.889126	0.889107
12_20529327_20740933_DUP	1	0	2247	3608	0.709245	inf			0.889126	0.889114
6_74309157_74413069_DUP	1	0	2247	3608	0.709245	inf			0.889126	0.889124
12_129587535_129674124_DEL	0	1	2248	3607	0.797995	0			0.889126	0.889126
6_91079060_91773705_DUP	1	0	2247	3608	0.709245	inf			0.889126	0.889126
8_13285702_13463024_DEL	0	1	2248	3607	0.797995	0			0.889126	0.889126
15_59614841_59907586_DEL	0	1	2248	3607	0.797995	0			0.889126	0.889126
17_73513677_73565171_DUP	1	0	2247	3608	0.709245	inf			0.889126	0.889126
12_50297670_50351075_DUP	1	0	2247	3608	0.709245	inf			0.889126	0.889126
12_90161421_90773613_DEL	1	0	2247	3608	0.709245	inf			0.889126	0.889126
15_89716846_89867564_DUP	1	0	2247	3608	0.709245	inf			0.889126	0.889126
2_34264495_34480634_DUP	1	0	2247	3608	0.709245	inf			0.889126	0.889126
6_31355260_31355260_DEL	1	0	2247	3608	0.709245	inf			0.889126	0.889126
2_188480265_188665869_DEL	0	1	2248	3607	0.797995	0			0.889126	0.889126
10_68138358_68178302_DEL	0	1	2248	3607	0.797995	0			0.889126	0.889126
9_78163305_78219081_DUP	0	1	2248	3607	0.797995	0			0.889126	0.889126
2_166647689_166757136_DUP	1	0	2247	3608	0.709245	inf			0.889126	0.889126
2_154410388_154936872_DUP	1	0	2247	3608	0.709245	inf			0.889126	0.889126
9_36367713_36676813_DUP	0	1	2248	3607	0.797995	0			0.889126	0.889126
4_143873005_144021142_DEL	1	0	2247	3608	0.709245	inf			0.889126	0.889126
2_130947000_131145947_DEL	0	1	2248	3607	0.797995	0			0.889126	0.889126
10_84265169_84335691_DEL	1	0	2247	3608	0.709245	inf			0.889126	0.889126
9_28545107_28588081_DEL	0	1	2248	3607	0.797995	0			0.889126	0.889126
10_92064234_92100351_DUP	1	0	2247	3608	0.709245	inf			0.889126	0.889126
10_98125754_98175291_DEL	0	1	2248	3607	0.797995	0			0.889126	0.889126
4_172031172_172475333_DEL	0	1	2248	3607	0.797995	0			0.889126	0.889126
6_34546560_34922439_DUP	1	0	2247	3608	0.709245	inf			0.889126	0.889126
4_181758685_182043881_DUP	0	1	2248	3607	0.797995	0			0.889126	0.889126
2_106874835_108440432_DEL	0	1	2248	3607	0.797995	0			0.889126	0.889126
11_6056807_6090372_DEL	1	0	2247	3608	0.709245	inf			0.889126	0.889126
2_78593474_78965531_DUP	1	0	2247	3608	0.709245	inf			0.889126	0.889126
2_62489874_62555162_DUP	1	0	2247	3608	0.709245	inf			0.889126	0.889126
11_9990080_10188537_DEL	1	0	2247	3608	0.709245	inf			0.889126	0.889126
2_56664281_57574704_DEL	1	0	2247	3608	0.709245	inf			0.889126	0.889126
2_51383069_51584738_DEL	1	0	2247	3608	0.709245	inf			0.889126	0.889126
5_17025201_17091822_DEL	1	0	2247	3608	0.709245	inf			0.889126	0.889126
9_83075900_83075900_DUP	0	1	2248	3607	0.797995	0			0.889126	0.889126
4_97352856_97546995_DEL	1	0	2247	3608	0.709245	inf			0.889126	0.889126
4_88030261_88290265_DUP	1	0	2247	3608	0.709245	inf			0.889126	0.889126
2_215937338_216107350_DEL	0	1	2248	3607	0.797995	0			0.889126	0.889126
3_72071821_72207426_DUP	1	0	2247	3608	0.709245	inf			0.889126	0.889126
1_14205287_15057696_DUP	0	1	2248	3607	0.797995	0			0.889126	0.889126
3_102750065_103245092_DUP	0	1	2248	3607	0.797995	0			0.889126	0.889126
3_62940644_63315149_DUP	0	1	2248	3607	0.797995	0			0.889126	0.889126
3_61400055_61528270_DEL	1	0	2247	3608	0.709245	inf			0.889126	0.889126
3_112832434_112890366_DUP	1	0	2247	3608	0.709245	inf			0.889126	0.889126
1_95387208_96700240_DUP	1	0	2247	3608	0.709245	inf			0.889126	0.889126
1_102322475_102423144_DUP	1	0	2247	3608	0.709245	inf			0.889126	0.889126
3_21254021_21345104_DEL	0	1	2248	3607	0.797995	0			0.889126	0.889126
3_171909101_172026710_DEL	1	0	2247	3608	0.709245	inf			0.889126	0.889126
3_185548683_185686741_DUP	0	1	2248	3607	0.797995	0			0.889126	0.889126
2_50959683_51109076_DUP	1	0	2247	3608	0.709245	inf			0.889126	0.889126
1_188826462_189705795_DUP	1	0	2247	3608	0.709245	inf			0.889126	0.889126
3_196085155_196453467_DUP	0	1	2248	3607	0.797995	0			0.889126	0.889126
21_38168296_38259933_DEL	1	0	2247	3608	0.709245	inf			0.889126	0.889126
21_29514609_29615155_DUP	0	1	2248	3607	0.797995	0			0.889126	0.889126
9_121452775_121729794_DEL	0	1	2248	3607	0.797995	0			0.889126	0.889126
20_41022015_41171759_DEL	1	0	2247	3608	0.709245	inf			0.889126	0.889126
4_23032993_23160597_DEL	0	1	2248	3607	0.797995	0			0.889126	0.889126
10_20140808_20447821_DEL	0	1	2248	3607	0.797995	0			0.889126	0.889126
20_5490828_5618582_DUP	0	1	2248	3607	0.797995	0			0.889126	0.889126
2_234651880_234732816_DEL	1	0	2247	3608	0.709245	inf			0.889126	0.889126
2_231179955_231179955_DEL	0	1	2248	3607	0.797995	0			0.889126	0.889126
10_30781288_30862662_DUP	0	1	2248	3607	0.797995	0			0.889126	0.889126
22_42811919_42906953_DUP	1	0	2247	3608	0.709245	inf			0.889126	0.889126
5_26125639_26210983_DUP	0	1	2248	3607	0.797995	0			0.889126	0.889126
7_93009475_93142186_DUP	1	0	2247	3608	0.709245	inf			0.889126	0.889126
2_49548375_50871418_DUP	1	0	2247	3608	0.709245	inf			0.889126	0.889126
18_74987632_75101373_DUP	1	0	2247	3608	0.709245	inf			0.889126	0.889126
8_131624634_131686649_DEL	1	0	2247	3608	0.709245	inf			0.889126	0.889126
11_126182644_126239697_DUP	0	1	2248	3607	0.797995	0			0.889126	0.889126
5_175656527_175857275_DUP	0	1	2248	3607	0.797995	0			0.889126	0.889126
18_68749559_73955305_DUP	0	1	2248	3607	0.797995	0			0.889126	0.889126
2_34029557_34190769_DUP	1	0	2247	3608	0.709245	inf			0.889126	0.889126
2_34778477_35085350_DUP	1	0	2247	3608	0.709245	inf			0.889126	0.889126
8_97244011_97395976_DUP	1	0	2247	3608	0.709245	inf			0.889126	0.889126
5_101288780_101296370_DEL	0	1	2248	3607	0.797995	0			0.889126	0.889128
2_22079770_22756232_DUP	1	0	2247	3608	0.709245	inf			0.889126	0.88913
5_102708441_104049069_DEL	1	0	2247	3608	0.709245	inf			0.889126	0.889135
5_104542273_105786813_DEL	1	0	2247	3608	0.709245	inf			0.889126	0.889142
8_62689398_63237280_DUP	0	1	2248	3607	0.797995	0			0.889126	0.889156
2_50880025_50952363_DUP	1	0	2247	3608	0.709245	inf			0.889126	0.889168
2_25829003_25931577_DEL	1	0	2247	3608	0.709245	inf			0.889126	0.889191
2_35090790_36048415_DUP	1	0	2247	3608	0.709245	inf			0.889126	0.889226
2_34491664_34760954_DUP	1	0	2247	3608	0.709245	inf			0.889126	0.889286
11_79170555_79232115_DUP	0	1	2248	3607	0.797995	0			0.889126	0.889361
2_45864710_45966098_DUP	1	0	2247	3608	0.709245	inf			0.889126	0.889489
18_41953851_42069669_DEL	1	0	2247	3608	0.709245	inf			0.889126	0.889627
8_139302480_139867430_DUP	1	0	2247	3608	0.709245	inf			0.889126	0.889806
19_51766397_52005986_DEL	1	0	2247	3608	0.709245	inf			0.889126	0.890023
6_1276875_1310984_DUP	1	0	2247	3608	0.709245	inf			0.889126	0.890328
2_37986161_38029028_DUP	0	1	2248	3607	0.797995	0			0.889126	0.890713
5_120096543_120159013_DEL	2	3	2246	3605	0.78137	1.77931	0.296882	10.664	0.891028	0.891194
8_4308969_4446859_DEL	2	3	2246	3605	0.78137	1.77931	0.296882	10.664	0.891028	0.8917
7_21594668_21789069_DEL	1	4	2247	3604	0.938286	0.666339	0.0743888	5.96874	0.891028	0.892315
19_6896380_7090222_DEL	3	4	2245	3604	0.267066	1.43567	0.34313	6.00689	0.89143	0.892999
14_46289579_46560856_DEL	2	5	2246	3603	0.995114	0.751422	0.117617	4.80062	0.89143	0.893815
16_82164832_83664582_DEL	3	1	2245	3607	0.987725	3.275	0.161555	66.3898	0.894445	0.894676
11_134247895_134432080_DUP	2	3	2246	3605	0.286922	0.616281	0.107468	3.5341	0.896188	0.895811
14_41854563_41983588_DEL	1	2	2247	3606	0.697439	0.591722	0.0566136	6.18463	0.899243	0.896949
8_57867899_57976315_DEL	2	4	2246	3604	0.85311	1.33399	0.243964	7.29424	0.900457	0.898141
7_16873213_17383061_DUP	2	3	2246	3605	0.897351	0.702497	0.0998468	4.94259	0.900523	0.899425
3_59705954_61022160_DEL	1	4	2247	3604	0.822807	0.539469	0.064679	4.49955	0.906284	0.900939
16_83677291_84521652_DEL	2	3	2246	3605	0.871203	1.4647	0.214489	10.0021	0.906284	0.902429
8_14543582_16842762_DEL	3	7	2245	3601	0.435449	0.713362	0.171398	2.96903	0.906521	0.904064
11_54847856_56009243_DEL	2	1	2246	3607	0.557592	2.3784	0.209957	26.9426	0.907335	0.90582
7_152117313_152308185_DUP	1	2	2247	3606	0.981944	0.423095	0.0213757	8.37442	0.907335	0.907755
15_42015413_42314362_DUP	2	3	2246	3605	0.13531	0.772832	0.152419	3.9186	0.907933	0.909912
7_153522051_153657480_DUP	9	11	2239	3597	0.579197	1.18893	0.458383	3.08377	0.911569	0.912247
9_23024223_23409568_DEL	2	2	2246	3606	0.716783	1.49478	0.209656	10.6572	0.912449	0.914954
9_9843265_10043014_DEL	1	3	2247	3605	0.950491	0.437335	0.0374089	5.11273	0.912449	0.917752
11_132827720_133261759_DUP	2	2	2246	3606	0.716783	1.49478	0.209656	10.6572	0.912449	0.92064
6_94460977_95676656_DEL	6	11	2242	3597	0.349504	0.840681	0.312386	2.26241	0.917709	0.923726
16_16857605_17843416_DUP	1	3	2247	3605	0.931388	0.581886	0.0536796	6.30763	0.921617	0.926426
2_49099508_49230413_DEL	4	7	2244	3601	0.638963	0.84068	0.217994	3.24202	0.932841	0.929086
11_129445942_129505704_DEL	0	2	2248	3606	0.951054	0			0.94246	0.931569
11_130599854_131331019_DUP	0	2	2248	3606	0.951054	0			0.94246	0.93386
1_72193716_72402880_DEL	0	2	2248	3606	0.951054	0			0.94246	0.935676
8_64656906_64854170_DEL	1	1	2247	3607	0.729746	2.66831	0.166743	42.6996	0.94246	0.937353
12_43937166_44009983_DEL	0	2	2248	3606	0.951054	0			0.94246	0.938663
1_113242122_113627881_DUP	1	1	2247	3607	0.729746	2.66831	0.166743	42.6996	0.94246	0.93972
1_79323774_79772485_DEL	1	1	2247	3607	0.729746	2.66831	0.166743	42.6996	0.94246	0.940638
7_107935578_107994197_DUP	0	2	2248	3606	0.951054	0			0.94246	0.941246
12_42977866_43262242_DUP	0	2	2248	3606	0.951054	0			0.94246	0.941657
1_46314219_46602402_DUP	1	1	2247	3607	0.729746	2.66831	0.166743	42.6996	0.94246	0.941955
14_43474406_43949284_DEL	0	2	2248	3606	0.951054	0			0.94246	0.942187
8_57727744_57864091_DEL	1	1	2247	3607	0.729746	2.66831	0.166743	42.6996	0.94246	0.942291
1_9401282_9401282_DUP	0	2	2248	3606	0.951054	0			0.94246	0.942351
9_138155079_138155079_DUP	1	1	2247	3607	0.729746	2.66831	0.166743	42.6996	0.94246	0.942393
10_2661196_3322625_DEL	1	1	2247	3607	0.729746	2.66831	0.166743	42.6996	0.94246	0.942432
13_57957878_58126228_DEL	1	1	2247	3607	0.729746	2.66831	0.166743	42.6996	0.94246	0.94244
10_3326652_3366193_DUP	1	1	2247	3607	0.729746	2.66831	0.166743	42.6996	0.94246	0.94245
11_25606707_25835890_DUP	1	1	2247	3607	0.729746	2.66831	0.166743	42.6996	0.94246	0.942454
11_25156627_25593848_DUP	1	1	2247	3607	0.729746	2.66831	0.166743	42.6996	0.94246	0.942454
9_6544820_6686479_DEL	0	2	2248	3606	0.951054	0			0.94246	0.942458
11_21637925_21702619_DEL	0	2	2248	3606	0.951054	0			0.94246	0.94246
9_4152102_4162147_DUP	0	2	2248	3606	0.951054	0			0.94246	0.94246
11_4001916_4234786_DUP	0	2	2248	3606	0.951054	0			0.94246	0.94246
7_152945148_153475697_DUP	1	1	2247	3607	0.729746	2.66831	0.166743	42.6996	0.94246	0.94246
10_111202837_111332634_DEL	1	1	2247	3607	0.729746	2.66831	0.166743	42.6996	0.94246	0.94246
10_105294641_105391300_DUP	1	1	2247	3607	0.729746	2.66831	0.166743	42.6996	0.94246	0.94246
7_149365696_149609948_DUP	1	1	2247	3607	0.729746	2.66831	0.166743	42.6996	0.94246	0.94246
13_32267929_32345208_DEL	0	2	2248	3606	0.951054	0			0.94246	0.94246
10_89309048_89387331_DEL	0	2	2248	3606	0.951054	0			0.94246	0.94246
7_146189136_146571958_DEL	1	1	2247	3607	0.729746	2.66831	0.166743	42.6996	0.94246	0.94246
10_88194529_88585926_DUP	0	2	2248	3606	0.951054	0			0.94246	0.94246
12_129761834_130479200_DUP	1	1	2247	3607	0.729746	2.66831	0.166743	42.6996	0.94246	0.94246
14_43975105_44150069_DUP	0	2	2248	3606	0.951054	0			0.94246	0.94246
10_81588967_81682640_DUP	0	2	2248	3606	0.951054	0			0.94246	0.94246
13_37221311_37460648_DUP	1	1	2247	3607	0.729746	2.66831	0.166743	42.6996	0.94246	0.94246
12_109549579_109645816_DUP	1	1	2247	3607	0.729746	2.66831	0.166743	42.6996	0.94246	0.94246
9_73941970_74098631_DEL	1	1	2247	3607	0.729746	2.66831	0.166743	42.6996	0.94246	0.94246
11_93908872_93961421_DUP	0	2	2248	3606	0.951054	0			0.94246	0.94246
10_46019460_46085224_DEL	1	1	2247	3607	0.729746	2.66831	0.166743	42.6996	0.94246	0.94246
8_121468486_122708512_DUP	0	2	2248	3606	0.951054	0			0.94246	0.94246
11_122575669_122684332_DUP	1	1	2247	3607	0.729746	2.66831	0.166743	42.6996	0.94246	0.94246
8_98315090_98526766_DEL	1	1	2247	3607	0.729746	2.66831	0.166743	42.6996	0.94246	0.94246
9_104986390_105047696_DUP	1	1	2247	3607	0.729746	2.66831	0.166743	42.6996	0.94246	0.94246
12_59074758_59238386_DUP	1	1	2247	3607	0.729746	2.66831	0.166743	42.6996	0.94246	0.94246
10_16675168_17030854_DUP	0	2	2248	3606	0.951054	0			0.94246	0.94246
9_115672402_116028559_DUP	0	2	2248	3606	0.951054	0			0.94246	0.94246
13_94673189_97520107_DEL	1	1	2247	3607	0.729746	2.66831	0.166743	42.6996	0.94246	0.94246
9_24543732_24773315_DEL	0	2	2248	3606	0.951054	0			0.94246	0.94246
3_82906760_83329109_DEL	0	2	2248	3606	0.951054	0			0.94246	0.94246
3_143757190_145797723_DEL	1	1	2247	3607	0.729746	2.66831	0.166743	42.6996	0.94246	0.94246
3_5442857_6131326_DUP	0	2	2248	3606	0.951054	0			0.94246	0.94246
6_128311140_129589507_DEL	0	2	2248	3606	0.951054	0			0.94246	0.94246
3_66597260_66845554_DUP	0	2	2248	3606	0.951054	0			0.94246	0.94246
16_78940695_79085534_DEL	1	1	2247	3607	0.729746	2.66831	0.166743	42.6996	0.94246	0.94246
18_49338409_49443835_DEL	0	2	2248	3606	0.951054	0			0.94246	0.94246
16_76617507_76704812_DEL	0	2	2248	3606	0.951054	0			0.94246	0.94246
2_196824142_197529542_DUP	1	1	2247	3607	0.729746	2.66831	0.166743	42.6996	0.94246	0.94246
3_4102091_4250372_DEL	1	1	2247	3607	0.729746	2.66831	0.166743	42.6996	0.94246	0.94246
19_20054823_20700135_DUP	1	1	2247	3607	0.729746	2.66831	0.166743	42.6996	0.94246	0.94246
2_193882856_195630511_DEL	0	2	2248	3606	0.951054	0			0.94246	0.94246
16_7752167_7829393_DUP	1	1	2247	3607	0.729746	2.66831	0.166743	42.6996	0.94246	0.94246
3_116118632_118758169_DUP	1	1	2247	3607	0.729746	2.66831	0.166743	42.6996	0.94246	0.94246
2_56415888_56493830_DEL	1	1	2247	3607	0.729746	2.66831	0.166743	42.6996	0.94246	0.94246
7_4076153_4530940_DUP	1	1	2247	3607	0.729746	2.66831	0.166743	42.6996	0.94246	0.94246
7_4827859_4872614_DEL	1	1	2247	3607	0.729746	2.66831	0.166743	42.6996	0.94246	0.94246
16_5660929_5868700_DEL	1	1	2247	3607	0.729746	2.66831	0.166743	42.6996	0.94246	0.94246
16_15064134_16305355_DEL	1	1	2247	3607	0.729746	2.66831	0.166743	42.6996	0.94246	0.94246
2_49232729_49232729_DEL	0	2	2248	3606	0.951054	0			0.94246	0.94246
3_4015109_4083174_DEL	0	2	2248	3606	0.951054	0			0.94246	0.94246
3_74760682_74961815_DUP	0	2	2248	3606	0.951054	0			0.94246	0.94246
2_34264495_34480634_DEL	0	2	2248	3606	0.951054	0			0.94246	0.94246
5_98425200_99122175_DEL	0	2	2248	3606	0.951054	0			0.94246	0.94246
5_97061761_97354672_DEL	0	2	2248	3606	0.951054	0			0.94246	0.94246
22_23262118_23648478_DUP	1	1	2247	3607	0.729746	2.66831	0.166743	42.6996	0.94246	0.94246
2_1854555_1855666_DUP	1	1	2247	3607	0.729746	2.66831	0.166743	42.6996	0.94246	0.94246
4_8476118_8609153_DEL	1	1	2247	3607	0.729746	2.66831	0.166743	42.6996	0.94246	0.94246
21_16956149_17143899_DUP	1	1	2247	3607	0.729746	2.66831	0.166743	42.6996	0.94246	0.94246
20_61149264_61323883_DUP	1	1	2247	3607	0.729746	2.66831	0.166743	42.6996	0.94246	0.94246
17_64411139_64411139_DEL	0	2	2248	3606	0.951054	0			0.94246	0.94246
6_94460977_95676656_DUP	0	2	2248	3606	0.951054	0			0.94246	0.94246
3_192280086_192355563_DUP	1	1	2247	3607	0.729746	2.66831	0.166743	42.6996	0.94246	0.94246
19_54992832_55180067_DUP	1	1	2247	3607	0.729746	2.66831	0.166743	42.6996	0.94246	0.94246
22_47489470_49109677_DEL	0	2	2248	3606	0.951054	0			0.94246	0.94246
20_23424613_23569186_DUP	0	2	2248	3606	0.951054	0			0.94246	0.94246
19_53974216_54130466_DUP	0	2	2248	3606	0.951054	0			0.94246	0.94246
20_5270034_5397328_DEL	0	2	2248	3606	0.951054	0			0.94246	0.94246
2_46748277_47565795_DUP	0	2	2248	3606	0.951054	0			0.94246	0.94246
22_34144823_34260738_DEL	0	2	2248	3606	0.951054	0			0.94246	0.94246
4_115109995_115830423_DUP	0	2	2248	3606	0.951054	0			0.94246	0.94246
7_7040500_7111258_DEL	0	2	2248	3606	0.951054	0			0.94246	0.94246
2_184121974_184172465_DEL	1	1	2247	3607	0.729746	2.66831	0.166743	42.6996	0.94246	0.94246
15_54864116_54919253_DEL	0	2	2248	3606	0.951054	0			0.94246	0.94246
5_177830769_177965242_DEL	0	2	2248	3606	0.951054	0			0.94246	0.94246
4_149398316_149587756_DEL	1	1	2247	3607	0.729746	2.66831	0.166743	42.6996	0.94246	0.94246
7_51673344_53454919_DUP	1	1	2247	3607	0.729746	2.66831	0.166743	42.6996	0.94246	0.94246
18_74380851_74423495_DUP	0	2	2248	3606	0.951054	0			0.94246	0.94246
7_53471324_53583058_DUP	1	1	2247	3607	0.729746	2.66831	0.166743	42.6996	0.94246	0.94246
18_75155910_76689018_DEL	0	2	2248	3606	0.951054	0			0.94246	0.94246
7_53606937_53636118_DUP	1	1	2247	3607	0.729746	2.66831	0.166743	42.6996	0.94246	0.94246
14_105391005_105480250_DUP	0	2	2248	3606	0.951054	0			0.94246	0.94246
4_152035299_152065197_DUP	0	2	2248	3606	0.951054	0			0.94246	0.94246
2_111399346_113103748_DEL	1	1	2247	3607	0.729746	2.66831	0.166743	42.6996	0.94246	0.94246
4_177191914_177246621_DUP	1	1	2247	3607	0.729746	2.66831	0.166743	42.6996	0.94246	0.94246
4_175656112_175728150_DEL	0	2	2248	3606	0.951054	0			0.94246	0.94246
14_46573875_46721454_DEL	0	2	2248	3606	0.951054	0			0.94246	0.94246
2_118178954_118402694_DEL	1	1	2247	3607	0.729746	2.66831	0.166743	42.6996	0.94246	0.94246
4_168818443_168987754_DEL	0	2	2248	3606	0.951054	0			0.94246	0.94246
4_153967418_154022065_DEL	1	1	2247	3607	0.729746	2.66831	0.166743	42.6996	0.94246	0.94246
7_9952849_11621741_DUP	1	1	2247	3607	0.729746	2.66831	0.166743	42.6996	0.94246	0.94246
18_65695878_68741416_DUP	1	1	2247	3607	0.729746	2.66831	0.166743	42.6996	0.94246	0.94246
2_133759852_140700670_DUP	1	1	2247	3607	0.729746	2.66831	0.166743	42.6996	0.94246	0.94246
15_58629349_58674669_DEL	0	2	2248	3606	0.951054	0			0.94246	0.94246
7_13093951_13239314_DEL	0	2	2248	3606	0.951054	0			0.94246	0.94246
2_56664281_57574704_DUP	1	1	2247	3607	0.729746	2.66831	0.166743	42.6996	0.94246	0.94246
14_43975105_44150069_DEL	1	1	2247	3607	0.729746	2.66831	0.166743	42.6996	0.94246	0.94246
15_95411105_95662785_DEL	1	1	2247	3607	0.729746	2.66831	0.166743	42.6996	0.94246	0.94246
18_75155910_76689018_DUP	1	1	2247	3607	0.729746	2.66831	0.166743	42.6996	0.94246	0.94246
7_16873213_17383061_DEL	0	2	2248	3606	0.951054	0			0.94246	0.942469
2_165631433_165737399_DUP	1	1	2247	3607	0.729746	2.66831	0.166743	42.6996	0.94246	0.942491
15_88970225_89530387_DUP	1	1	2247	3607	0.729746	2.66831	0.166743	42.6996	0.94246	0.942518
7_17582606_17644213_DEL	1	1	2247	3607	0.729746	2.66831	0.166743	42.6996	0.94246	0.942603
2_10540386_10824859_DUP	1	1	2247	3607	0.729746	2.66831	0.166743	42.6996	0.94246	0.942749
15_85460890_85491553_DEL	0	2	2248	3606	0.951054	0			0.94246	0.942987
2_75448529_75510582_DEL	1	1	2247	3607	0.729746	2.66831	0.166743	42.6996	0.94246	0.943361
4_190315679_190777761_DEL	0	2	2248	3606	0.951054	0			0.94246	0.943953
4_132362201_132362201_DUP	0	2	2248	3606	0.951054	0			0.94246	0.944825
15_62046610_62118874_DEL	0	2	2248	3606	0.951054	0			0.94246	0.945793
15_58697362_58785023_DEL	0	2	2248	3606	0.951054	0			0.94246	0.947086
7_17582606_17644213_DUP	1	1	2247	3607	0.729746	2.66831	0.166743	42.6996	0.94246	0.948354
13_43741846_43787647_DUP	3	4	2245	3604	0.768215	1.42978	0.31349	6.52096	0.949121	0.949568
3_6194595_6226611_DEL	0	1	2248	3607	0.713278	0			0.953256	0.950762
1_116240026_116284997_DUP	1	0	2247	3608	0.794689	inf			0.953256	0.951576
1_214648437_214695143_DEL	1	0	2247	3608	0.794689	inf			0.953256	0.952152
3_187908176_187976479_DEL	0	1	2248	3607	0.713278	0			0.953256	0.95262
3_194079943_194111622_DEL	1	0	2247	3608	0.794689	inf			0.953256	0.952876
14_46148494_46274688_DUP	1	0	2247	3608	0.794689	inf			0.953256	0.953071
21_38345003_38461310_DEL	1	0	2247	3608	0.794689	inf			0.953256	0.953172
2_131548941_131755154_DUP	0	1	2248	3607	0.713278	0			0.953256	0.95322
9_30134409_30457594_DEL	1	0	2247	3608	0.794689	inf			0.953256	0.95324
4_148657944_148658108_DEL	1	0	2247	3608	0.794689	inf			0.953256	0.953251
4_138293584_138313173_DUP	1	0	2247	3608	0.794689	inf			0.953256	0.953254
4_137797233_138269679_DUP	1	0	2247	3608	0.794689	inf			0.953256	0.953256
4_117903947_118021467_DUP	1	0	2247	3608	0.794689	inf			0.953256	0.953256
10_67791316_67944580_DUP	1	0	2247	3608	0.794689	inf			0.953256	0.953256
4_104982466_105065029_DEL	1	0	2247	3608	0.794689	inf			0.953256	0.953256
9_92301054_92526756_DUP	0	1	2248	3607	0.713278	0			0.953256	0.953256
3_152333054_153407913_DEL	1	0	2247	3608	0.794689	inf			0.953256	0.953256
9_125154693_125314550_DEL	0	1	2248	3607	0.713278	0			0.953256	0.953256
9_98813768_98852399_DEL	0	1	2248	3607	0.713278	0			0.953256	0.953256
2_215581061_215679686_DEL	1	0	2247	3608	0.794689	inf			0.953256	0.953256
4_78752768_78981448_DUP	1	0	2247	3608	0.794689	inf			0.953256	0.953256
2_241991875_242100062_DUP	0	1	2248	3607	0.713278	0			0.953256	0.953256
9_140219715_140219715_DEL	1	0	2247	3608	0.794689	inf			0.953256	0.953256
20_23920639_24478253_DEL	1	0	2247	3608	0.794689	inf			0.953256	0.953256
9_111597786_111843612_DUP	1	0	2247	3608	0.794689	inf			0.953256	0.953256
20_31760927_31831108_DEL	1	0	2247	3608	0.794689	inf			0.953256	0.953256
20_33501452_33600406_DEL	1	0	2247	3608	0.794689	inf			0.953256	0.953256
10_5133895_5264567_DEL	0	1	2248	3607	0.713278	0			0.953256	0.953256
20_47494232_47606201_DUP	0	1	2248	3607	0.713278	0			0.953256	0.953256
10_35474421_35657506_DUP	1	0	2247	3608	0.794689	inf			0.953256	0.953256
2_200142440_200418595_DUP	0	1	2248	3607	0.713278	0			0.953256	0.953256
1_5374940_5458909_DEL	0	1	2248	3607	0.713278	0			0.953256	0.953256
3_21351637_21351637_DUP	1	0	2247	3608	0.794689	inf			0.953256	0.953256
9_140111714_140111714_DEL	1	0	2247	3608	0.794689	inf			0.953256	0.953256
9_140109453_140109453_DEL	1	0	2247	3608	0.794689	inf			0.953256	0.953256
9_140106361_140106361_DEL	1	0	2247	3608	0.794689	inf			0.953256	0.953256
9_140087121_140087121_DEL	1	0	2247	3608	0.794689	inf			0.953256	0.953256
9_140084863_140084863_DEL	1	0	2247	3608	0.794689	inf			0.953256	0.953256
9_140080434_140080434_DEL	1	0	2247	3608	0.794689	inf			0.953256	0.953256
9_140078472_140078472_DEL	1	0	2247	3608	0.794689	inf			0.953256	0.953256
9_140073120_140073120_DEL	1	0	2247	3608	0.794689	inf			0.953256	0.953256
9_140072573_140072573_DEL	1	0	2247	3608	0.794689	inf			0.953256	0.953256
9_140070638_140070638_DEL	1	0	2247	3608	0.794689	inf			0.953256	0.953256
9_140070612_140070612_DEL	1	0	2247	3608	0.794689	inf			0.953256	0.953256
9_140069024_140069024_DEL	1	0	2247	3608	0.794689	inf			0.953256	0.953256
9_140067838_140067838_DEL	1	0	2247	3608	0.794689	inf			0.953256	0.953256
9_140066122_140066122_DEL	1	0	2247	3608	0.794689	inf			0.953256	0.953256
9_140056456_140056456_DEL	1	0	2247	3608	0.794689	inf			0.953256	0.953256
9_140115554_140115554_DEL	1	0	2247	3608	0.794689	inf			0.953256	0.953256
9_140051376_140051376_DEL	1	0	2247	3608	0.794689	inf			0.953256	0.953256
9_140127157_140127157_DEL	1	0	2247	3608	0.794689	inf			0.953256	0.953256
9_140127809_140127809_DEL	1	0	2247	3608	0.794689	inf			0.953256	0.953256
9_140188578_140188578_DEL	1	0	2247	3608	0.794689	inf			0.953256	0.953256
9_140188225_140188225_DEL	1	0	2247	3608	0.794689	inf			0.953256	0.953256
9_140186866_140186866_DEL	1	0	2247	3608	0.794689	inf			0.953256	0.953256
9_140164255_140164255_DEL	1	0	2247	3608	0.794689	inf			0.953256	0.953256
9_140162664_140162664_DEL	1	0	2247	3608	0.794689	inf			0.953256	0.953256
9_140161526_140161526_DEL	1	0	2247	3608	0.794689	inf			0.953256	0.953256
9_140146560_140146560_DEL	1	0	2247	3608	0.794689	inf			0.953256	0.953256
9_140143470_140143470_DEL	1	0	2247	3608	0.794689	inf			0.953256	0.953256
9_140140111_140140111_DEL	1	0	2247	3608	0.794689	inf			0.953256	0.953256
9_140139184_140139184_DEL	1	0	2247	3608	0.794689	inf			0.953256	0.953256
9_140136802_140136802_DEL	1	0	2247	3608	0.794689	inf			0.953256	0.953256
9_140133622_140133622_DEL	1	0	2247	3608	0.794689	inf			0.953256	0.953256
9_140133600_140133600_DEL	1	0	2247	3608	0.794689	inf			0.953256	0.953256
9_140128088_140128088_DEL	1	0	2247	3608	0.794689	inf			0.953256	0.953256
9_140128085_140128085_DEL	1	0	2247	3608	0.794689	inf			0.953256	0.953256
9_140127247_140127247_DEL	1	0	2247	3608	0.794689	inf			0.953256	0.953256
9_140031920_140031920_DEL	1	0	2247	3608	0.794689	inf			0.953256	0.953256
9_140029474_140029474_DEL	1	0	2247	3608	0.794689	inf			0.953256	0.953256
9_140022392_140022392_DEL	1	0	2247	3608	0.794689	inf			0.953256	0.953256
9_139987350_139987350_DEL	1	0	2247	3608	0.794689	inf			0.953256	0.953256
9_139969400_139969400_DEL	1	0	2247	3608	0.794689	inf			0.953256	0.953256
9_139968812_139968812_DEL	1	0	2247	3608	0.794689	inf			0.953256	0.953256
3_96778204_97063914_DEL	0	1	2248	3607	0.713278	0			0.953256	0.953256
1_5179530_5297887_DEL	0	1	2248	3607	0.713278	0			0.953256	0.953256
1_5307076_5358282_DEL	0	1	2248	3607	0.713278	0			0.953256	0.953256
2_128960351_129455368_DEL	1	0	2247	3608	0.794689	inf			0.953256	0.953256
3_70351922_70479629_DEL	0	1	2248	3607	0.713278	0			0.953256	0.953256
3_67426281_67866836_DEL	1	0	2247	3608	0.794689	inf			0.953256	0.953256
3_103629938_103974324_DEL	1	0	2247	3608	0.794689	inf			0.953256	0.953256
1_48234358_48291425_DUP	1	0	2247	3608	0.794689	inf			0.953256	0.953256
1_49936419_50104642_DEL	1	0	2247	3608	0.794689	inf			0.953256	0.953256
3_54356832_54530927_DEL	1	0	2247	3608	0.794689	inf			0.953256	0.953256
3_52622086_53822913_DEL	0	1	2248	3607	0.713278	0			0.953256	0.953256
3_43284172_43364167_DUP	0	1	2248	3607	0.713278	0			0.953256	0.953256
9_139990813_139990813_DEL	1	0	2247	3608	0.794689	inf			0.953256	0.953256
9_139991889_139991889_DEL	1	0	2247	3608	0.794689	inf			0.953256	0.953256
9_139994411_139994411_DEL	1	0	2247	3608	0.794689	inf			0.953256	0.953256
9_139996099_139996099_DEL	1	0	2247	3608	0.794689	inf			0.953256	0.953256
9_140022321_140022321_DEL	1	0	2247	3608	0.794689	inf			0.953256	0.953256
9_140008443_140008443_DEL	1	0	2247	3608	0.794689	inf			0.953256	0.953256
9_140006202_140006202_DEL	1	0	2247	3608	0.794689	inf			0.953256	0.953256
9_140005916_140005916_DEL	1	0	2247	3608	0.794689	inf			0.953256	0.953256
9_140005383_140005383_DEL	1	0	2247	3608	0.794689	inf			0.953256	0.953256
9_140004341_140004341_DEL	1	0	2247	3608	0.794689	inf			0.953256	0.953256
9_140002989_140002989_DEL	1	0	2247	3608	0.794689	inf			0.953256	0.953256
3_146650207_146899650_DEL	1	0	2247	3608	0.794689	inf			0.953256	0.953256
9_140002934_140002934_DEL	1	0	2247	3608	0.794689	inf			0.953256	0.953256
9_140002856_140002856_DEL	1	0	2247	3608	0.794689	inf			0.953256	0.953256
9_140002754_140002754_DEL	1	0	2247	3608	0.794689	inf			0.953256	0.953256
9_140002187_140002187_DEL	1	0	2247	3608	0.794689	inf			0.953256	0.953256
9_140002007_140002007_DEL	1	0	2247	3608	0.794689	inf			0.953256	0.953256
9_140001036_140001036_DEL	1	0	2247	3608	0.794689	inf			0.953256	0.953256
9_140000751_140000751_DEL	1	0	2247	3608	0.794689	inf			0.953256	0.953256
9_140000373_140000373_DEL	1	0	2247	3608	0.794689	inf			0.953256	0.953256
9_140002875_140002875_DEL	1	0	2247	3608	0.794689	inf			0.953256	0.953256
2_123661246_125774467_DEL	1	0	2247	3608	0.794689	inf			0.953256	0.953256
9_140221582_140221582_DEL	1	0	2247	3608	0.794689	inf			0.953256	0.953256
2_120025936_120166724_DUP	0	1	2248	3607	0.713278	0			0.953256	0.953256
17_4299256_4354348_DEL	1	0	2247	3608	0.794689	inf			0.953256	0.953256
12_99598255_99737009_DEL	0	1	2248	3607	0.713278	0			0.953256	0.953256
17_5457838_5724815_DUP	0	1	2248	3607	0.713278	0			0.953256	0.953256
12_95864641_96029331_DUP	1	0	2247	3608	0.794689	inf			0.953256	0.953256
17_5790379_5939014_DEL	0	1	2248	3607	0.713278	0			0.953256	0.953256
17_8251845_8332598_DUP	1	0	2247	3608	0.794689	inf			0.953256	0.953256
6_100241479_100296024_DUP	1	0	2247	3608	0.794689	inf			0.953256	0.953256
6_91988031_92119129_DEL	0	1	2248	3607	0.713278	0			0.953256	0.953256
6_89830168_90326360_DUP	0	1	2248	3607	0.713278	0			0.953256	0.953256
8_10328677_10450049_DUP	1	0	2247	3608	0.794689	inf			0.953256	0.953256
8_10451585_10501771_DUP	1	0	2247	3608	0.794689	inf			0.953256	0.953256
8_10503545_10848725_DUP	1	0	2247	3608	0.794689	inf			0.953256	0.953256
6_80985539_81515701_DUP	1	0	2247	3608	0.794689	inf			0.953256	0.953256
12_123575742_124029689_DUP	1	0	2247	3608	0.794689	inf			0.953256	0.953256
6_65591554_65663874_DEL	0	1	2248	3607	0.713278	0			0.953256	0.953256
12_27298158_27790632_DEL	1	0	2247	3608	0.794689	inf			0.953256	0.953256
8_17905663_17996495_DEL	0	1	2248	3607	0.713278	0			0.953256	0.953256
8_18037946_18200916_DEL	1	0	2247	3608	0.794689	inf			0.953256	0.953256
18_6865658_7111510_DUP	0	1	2248	3607	0.713278	0			0.953256	0.953256
18_6865658_7111510_DEL	0	1	2248	3607	0.713278	0			0.953256	0.953256
18_12263373_12439879_DUP	1	0	2247	3608	0.794689	inf			0.953256	0.953256
18_13541605_13919154_DEL	1	0	2247	3608	0.794689	inf			0.953256	0.953256
12_7737334_7810299_DUP	0	1	2248	3607	0.713278	0			0.953256	0.953256
18_26570051_26732927_DEL	1	0	2247	3608	0.794689	inf			0.953256	0.953256
12_4468453_4581950_DUP	1	0	2247	3608	0.794689	inf			0.953256	0.953256
6_28963248_29142020_DEL	1	0	2247	3608	0.794689	inf			0.953256	0.953256
4_166908851_167120342_DEL	0	1	2248	3607	0.713278	0			0.953256	0.953256
12_505759_557052_DUP	1	0	2247	3608	0.794689	inf			0.953256	0.953256
18_4548348_4824346_DUP	0	1	2248	3607	0.713278	0			0.953256	0.953256
12_127056023_127108715_DUP	0	1	2248	3607	0.713278	0			0.953256	0.953256
17_3019437_3250405_DUP	0	1	2248	3607	0.713278	0			0.953256	0.953256
6_123096849_123156862_DEL	0	1	2248	3607	0.713278	0			0.953256	0.953256
7_84191346_84603151_DEL	0	1	2248	3607	0.713278	0			0.953256	0.953256
14_46289579_46560856_DUP	1	0	2247	3608	0.794689	inf			0.953256	0.953256
14_41824706_41836456_DEL	0	1	2248	3607	0.713278	0			0.953256	0.953256
14_46573875_46721454_DUP	1	0	2247	3608	0.794689	inf			0.953256	0.953256
14_82060017_83030754_DUP	0	1	2248	3607	0.713278	0			0.953256	0.953256
14_22787541_22884200_DEL	0	1	2248	3607	0.713278	0			0.953256	0.953256
15_29079105_30365463_DEL	1	0	2247	3608	0.794689	inf			0.953256	0.953256
13_114055905_114162403_DUP	0	1	2248	3607	0.713278	0			0.953256	0.953256
15_34895638_35031653_DEL	1	0	2247	3608	0.794689	inf			0.953256	0.953256
15_55171903_55375001_DEL	0	1	2248	3607	0.713278	0			0.953256	0.953256
13_106404762_106467194_DUP	1	0	2247	3608	0.794689	inf			0.953256	0.953256
13_86440058_86740599_DEL	1	0	2247	3608	0.794689	inf			0.953256	0.953256
15_78400640_79019578_DUP	1	0	2247	3608	0.794689	inf			0.953256	0.953256
7_20592679_20727328_DUP	1	0	2247	3608	0.794689	inf			0.953256	0.953256
13_62328348_63482900_DUP	1	0	2247	3608	0.794689	inf			0.953256	0.953256
13_48381991_48583854_DEL	1	0	2247	3608	0.794689	inf			0.953256	0.953256
7_15053485_15053485_DEL	1	0	2247	3608	0.794689	inf			0.953256	0.953256
13_43790913_43798077_DUP	1	0	2247	3608	0.794689	inf			0.953256	0.953256
15_98548857_98712910_DEL	1	0	2247	3608	0.794689	inf			0.953256	0.953256
15_100695954_100868383_DUP	0	1	2248	3607	0.713278	0			0.953256	0.953256
13_25267734_25325622_DUP	1	0	2247	3608	0.794689	inf			0.953256	0.953256
7_4076153_4530940_DEL	1	0	2247	3608	0.794689	inf			0.953256	0.953256
16_10778743_10845991_DEL	1	0	2247	3608	0.794689	inf			0.953256	0.953256
6_155370751_155433769_DEL	1	0	2247	3608	0.794689	inf			0.953256	0.953256
16_28826049_29044745_DEL	1	0	2247	3608	0.794689	inf			0.953256	0.953256
13_20797589_21067163_DEL	1	0	2247	3608	0.794689	inf			0.953256	0.953256
16_80767526_80922944_DEL	1	0	2247	3608	0.794689	inf			0.953256	0.953256
8_519919_845554_DUP	1	0	2247	3608	0.794689	inf			0.953256	0.953256
12_133166317_133223580_DUP	1	0	2247	3608	0.794689	inf			0.953256	0.953256
11_134149641_134150220_DEL	1	0	2247	3608	0.794689	inf			0.953256	0.953256
8_58572471_58694706_DEL	1	0	2247	3608	0.794689	inf			0.953256	0.953256
6_2195078_2331852_DEL	0	1	2248	3607	0.713278	0			0.953256	0.953256
18_74475370_74563164_DUP	0	1	2248	3607	0.713278	0			0.953256	0.953256
2_44327724_44332372_DUP	0	1	2248	3607	0.713278	0			0.953256	0.953256
11_77679933_77823791_DUP	0	1	2248	3607	0.713278	0			0.953256	0.953256
11_73307421_73388875_DUP	1	0	2247	3608	0.794689	inf			0.953256	0.953256
5_64365561_64512071_DUP	0	1	2248	3607	0.713278	0			0.953256	0.953256
11_133270900_133314339_DUP	1	0	2247	3608	0.794689	inf			0.953256	0.953256
2_44437217_44492867_DUP	0	1	2248	3607	0.713278	0			0.953256	0.953256
5_61764866_62030788_DUP	1	0	2247	3608	0.794689	inf			0.953256	0.953256
11_48438526_48876899_DEL	0	1	2248	3607	0.713278	0			0.953256	0.953256
5_44052514_44297010_DUP	1	0	2247	3608	0.794689	inf			0.953256	0.953256
5_32616255_32722499_DUP	1	0	2247	3608	0.794689	inf			0.953256	0.953256
5_28557664_29238503_DEL	0	1	2248	3607	0.713278	0			0.953256	0.953256
5_25086440_25357088_DUP	0	1	2248	3607	0.713278	0			0.953256	0.953256
9_8288518_8480428_DUP	1	0	2247	3608	0.794689	inf			0.953256	0.953256
9_529916_884477_DEL	1	0	2247	3608	0.794689	inf			0.953256	0.953256
5_21235554_21637415_DEL	1	0	2247	3608	0.794689	inf			0.953256	0.953256
9_9794212_9825035_DEL	0	1	2248	3607	0.713278	0			0.953256	0.953256
11_24669006_24740434_DEL	1	0	2247	3608	0.794689	inf			0.953256	0.953256
11_24247531_24346093_DEL	1	0	2247	3608	0.794689	inf			0.953256	0.953256
5_6141688_6184207_DUP	0	1	2248	3607	0.713278	0			0.953256	0.953256
5_6022683_6136714_DUP	0	1	2248	3607	0.713278	0			0.953256	0.953256
4_189184881_189258322_DEL	1	0	2247	3608	0.794689	inf			0.953256	0.953256
4_188934395_189065934_DUP	0	1	2248	3607	0.713278	0			0.953256	0.953256
4_188519569_188657774_DEL	0	1	2248	3607	0.713278	0			0.953256	0.953256
2_95940651_96250068_DUP	0	1	2248	3607	0.713278	0			0.953256	0.953256
4_186518509_186741432_DUP	0	1	2248	3607	0.713278	0			0.953256	0.953256
9_18882338_19640344_DEL	1	0	2247	3608	0.794689	inf			0.953256	0.953256
4_186175197_186504058_DUP	1	0	2247	3608	0.794689	inf			0.953256	0.953256
4_180179576_180772704_DUP	1	0	2247	3608	0.794689	inf			0.953256	0.953256
5_20536822_20781145_DEL	1	0	2247	3608	0.794689	inf			0.953256	0.953256
5_77924020_78123484_DUP	1	0	2247	3608	0.794689	inf			0.953256	0.953256
9_2537934_2815542_DEL	1	0	2247	3608	0.794689	inf			0.953256	0.953256
11_80680409_80767675_DEL	0	1	2248	3607	0.713278	0			0.953256	0.953256
5_160493280_160823247_DUP	0	1	2248	3607	0.713278	0			0.953256	0.953256
19_20989703_20989703_DUP	0	1	2248	3607	0.713278	0			0.953256	0.953256
8_86886950_87055718_DUP	0	1	2248	3607	0.713278	0			0.953256	0.953265
11_125773768_125909581_DEL	1	0	2247	3608	0.794689	inf			0.953256	0.953271
19_54749060_54847587_DUP	1	0	2247	3608	0.794689	inf			0.953256	0.953314
8_144065004_144756386_DEL	0	1	2248	3607	0.713278	0			0.953256	0.953392
5_113603570_113662439_DUP	0	1	2248	3607	0.713278	0			0.953256	0.953581
11_102136320_102321128_DEL	1	0	2247	3608	0.794689	inf			0.953256	0.953848
5_113276728_113596392_DUP	0	1	2248	3607	0.713278	0			0.953256	0.954427
5_113673427_114696262_DUP	0	1	2248	3607	0.713278	0			0.953256	0.955127
2_12166259_12320631_DUP	0	1	2248	3607	0.713278	0			0.953256	0.956458
2_42073356_42108276_DEL	1	0	2247	3608	0.794689	inf			0.953256	0.958145
8_123706155_123784819_DUP	1	0	2247	3608	0.794689	inf			0.953256	0.960215
18_65256173_65680717_DUP	3	6	2245	3602	0.805076	0.72368	0.160541	3.26217	0.958916	0.962804
9_104939023_104977287_DEL	3	5	2245	3603	0.86827	1.41269	0.315289	6.32971	0.961549	0.965477
9_82928913_83051731_DUP	3	6	2245	3602	0.412828	0.775851	0.201602	2.98581	0.9683	0.968213
9_26294087_26426305_DEL	2	3	2246	3605	0.895451	0.52479	0.0590705	4.66231	0.970261	0.971128
20_14678135_14764611_DEL	5	6	2243	3602	0.67195	1.24931	0.363408	4.29482	0.971791	0.973925
13_110198159_110262556_DEL	3	2	2245	3606	0.537113	1.55846	0.258034	9.41271	0.97358	0.976096
1_25413466_25413466_DUP	1	3	2247	3605	0.514949	0.582699	0.0712461	4.7657	0.981798	0.97797
14_63774757_63855760_DUP	2	2	2246	3606	0.958409	1.88003	0.207564	17.0286	0.981798	0.979536
5_180115479_180215399_DUP	1	3	2247	3605	0.985801	0.363889	0.0184136	7.19116	0.981798	0.980702
11_34643721_34778141_DUP	1	3	2247	3605	0.985801	0.363889	0.0184136	7.19116	0.981798	0.981552
1_238651756_238772150_DUP	1	3	2247	3605	0.985801	0.363889	0.0184136	7.19116	0.981798	0.982298
3_36251715_36453013_DEL	1	3	2247	3605	0.985801	0.363889	0.0184136	7.19116	0.981798	0.983141
18_351378_2679139_DEL	2	3	2246	3605	0.780169	1.58495	0.244176	10.288	0.982873	0.984108
18_64344156_65253832_DEL	2	3	2246	3605	0.780169	1.58495	0.244176	10.288	0.982873	0.985272
12_33532804_34808652_DUP	2	3	2246	3605	0.805046	0.615544	0.0846079	4.47825	0.983953	0.986616
10_68348941_68669571_DEL	3	2	2245	3606	0.581081	1.53486	0.251456	9.36865	0.983953	0.988005
5_23814577_24190187_DEL	2	1	2246	3607	0.694495	1.96697	0.188736	20.4994	0.990262	0.989262
2_51604274_51723107_DEL	1	2	2247	3606	0.418916	0.53758	0.054354	5.31685	0.990262	0.990514
5_57563163_58168456_DUP	1	2	2247	3606	0.798131	0.489551	0.0417312	5.74295	0.990262	0.991637
17_71833923_72689024_DUP	9	16	2239	3592	0.630348	0.906648	0.386609	2.12621	0.991576	0.99288
7_81151903_82448100_DUP	1	3	2247	3605	0.684703	0.529479	0.0514549	5.44841	0.995202	0.9939
17_71831938_71831938_DUP	1	3	2247	3605	0.684703	0.529479	0.0514549	5.44841	0.995202	0.994604
1_145383239_145738979_DEL	2	2	2246	3606	0.657709	1.70274	0.227832	12.7257	0.995202	0.995122
17_50515304_50665238_DEL	1	2	2247	3606	0.91371	0.371237	0.020958	6.57588	0.995806	0.995487
2_110852875_110983320_DUP	2	1	2246	3607	0.46797	1.93667	0.190595	19.6788	0.995806	0.995676
11_134152143_134213630_DEL	1	2	2247	3606	0.546165	0.482812	0.0432926	5.38445	0.995806	0.995753
5_9091308_9629295_DUP	1	2	2247	3606	0.91371	0.371237	0.020958	6.57588	0.995806	0.99579
4_22671199_22771502_DEL	1	2	2247	3606	0.546165	0.482812	0.0432926	5.38445	0.995806	0.995804
9_125316850_125427807_DEL	2	1	2246	3607	0.46797	1.93667	0.190595	19.6788	0.995806	0.995806
1_218704179_219018648_DUP	2	1	2246	3607	0.979575	2.81772	0.141636	56.0558	0.995806	0.995806
13_22767492_23513880_DEL	2	1	2246	3607	0.979575	2.81772	0.141636	56.0558	0.995806	0.995806
6_66478480_69167714_DEL	2	1	2246	3607	0.979575	2.81772	0.141636	56.0558	0.995806	0.995936
19_20054823_20700135_DEL	2	1	2246	3607	0.979575	2.81772	0.141636	56.0558	0.995806	0.996249
1_175431064_175757311_DUP	3	3	2245	3605	0.995696	1.61727	0.244555	10.6952	0.996704	0.996992
6_118702621_119141192_DUP	2	4	2246	3604	0.832647	0.673724	0.111907	4.05608	0.996704	0.997733

## Sheet: Table S8
Table S8. extTADA analysis results.
Gene	dn_misD	dn_lof	mut_misD	mut_lof	cc_ocdjhu2020caucasian_lof_ca	cc_nordic_del_ca	cc_nordic_dup_ca	cc_ocdjhu2020caucasian_lof_co	cc_nordic_del_co	cc_nordic_dup_co	BF	PP	qvalue
CHD8	1	2	3.79448e-05	1.19427e-05	0	0	0	0	0	0	1251.35	0.828857	0.171143
ZMYM2	1	1	1.61279e-05	6.56132e-06	1	0	1	0	0	0	303.976	0.540541	0.315301
SCUBE1	1	1	1.96944e-05	4.51719e-06	1	0	0	0	0	0	190.036	0.423795	0.402269
ADIPOR2	1	1	4.36951e-06	1.68262e-06	0	0	0	1	0	0	91.975	0.26252	0.486072
COL4A3	1	1	2.6858e-05	7.70264e-06	0	0	0	0	0	0	79.893	0.236179	0.541622
INO80	1	1	2.60545e-05	8.10855e-06	0	0	0	0	0	0	79.6191	0.235561	0.578758
PNLIP	0	1	5.79808e-06	2.18778e-06	2	0	0	0	0	0	73.9192	0.222448	0.607157
NWD1	1	1	2.31345e-05	5.50822e-06	0	0	0	1	0	0	67.0041	0.205924	0.630522
STARD13	2	0	1.7741e-05	4.60251e-06	0	0	0	0	0	0	40.534	0.135605	0.656508
TLN2	0	1	4.46058e-05	1.10001e-05	1	1	0	0	0	0	29.8844	0.10367	0.68049
UBAP2L	0	1	2.32276e-05	5.0868e-06	1	0	0	0	0	0	26.3702	0.0926085	0.701117
ABCG8	0	1	1.09701e-05	2.77908e-06	1	0	0	1	0	0	22.4182	0.0798376	0.719371
C8orf48	0	1	2.11798e-06	1.1056e-06	0	0	0	0	0	0	17.9499	0.0649584	0.735961
C7orf61	0	1	2.34314e-06	1.06432e-06	0	0	0	0	0	0	17.9342	0.0649051	0.750185
TMEM38B	0	1	3.08577e-06	1.22251e-06	0	0	0	0	0	0	17.7263	0.0642012	0.762559
SFTPA1	0	1	3.74488e-06	1.10297e-06	0	0	0	0	0	0	17.6804	0.0640455	0.773397
SPRY2	0	1	3.65441e-06	1.26712e-06	0	0	0	0	0	0	17.609	0.0638035	0.782973
TUBA4A	0	1	4.44551e-06	1.60031e-06	0	0	0	0	0	0	17.3071	0.0627781	0.791542
HRG	0	1	4.66651e-06	1.9516e-06	0	0	0	0	0	0	17.0919	0.062046	0.799248
DEDD2	0	1	8.60531e-06	1.29078e-06	0	0	0	0	0	0	16.8058	0.0610708	0.806232
GSDMD	0	1	7.50478e-06	2.00643e-06	0	0	0	0	0	0	16.6201	0.0604367	0.812581
LETM2	0	1	6.57886e-06	2.37028e-06	0	0	0	0	0	0	16.583	0.0603101	0.818359
ZKSCAN3	0	1	6.98722e-06	2.32123e-06	0	0	0	0	0	0	16.5444	0.0601782	0.82364
RIOK3	0	1	7.64937e-06	2.43152e-06	0	0	0	0	0	0	16.3894	0.059648	0.828503
ELF1	0	1	7.30957e-06	2.59816e-06	0	0	0	0	0	0	16.3599	0.059547	0.832981
C8A	0	1	7.33931e-06	2.6507e-06	0	0	0	0	0	0	16.3299	0.0594443	0.837119
IGLON5	0	1	1.07706e-05	1.67677e-06	0	0	0	0	0	0	16.2853	0.0592917	0.840955
BRD7	0	1	6.95323e-06	2.93775e-06	0	0	0	0	0	0	16.2494	0.0591685	0.844522
SDCCAG8	0	1	7.33654e-06	3.30625e-06	0	0	0	0	0	0	16.0157	0.0583672	0.847871
RFX5	0	1	9.26045e-06	2.7144e-06	0	0	0	0	0	0	16.012	0.0583547	0.850997
RFWD3	0	1	7.70668e-06	3.50261e-06	0	0	0	0	0	0	15.8682	0.0578608	0.853937
SLC13A2	0	1	1.09897e-05	2.58972e-06	0	0	0	0	0	0	15.8174	0.0576862	0.856699
GRHL1	0	1	1.01491e-05	2.85753e-06	0	0	0	0	0	0	15.814	0.0576746	0.859293
GALNT11	0	1	9.65041e-06	3.0321e-06	0	0	0	0	0	0	15.8047	0.0576428	0.861736
SEMA7A	0	1	1.07078e-05	2.85096e-06	0	0	0	0	0	0	15.7359	0.0574062	0.864047
QRICH1	0	1	9.61556e-06	3.35017e-06	0	0	0	0	0	0	15.6613	0.0571497	0.866236
COPB2	0	1	8.60798e-06	4.2172e-06	0	0	0	0	0	0	15.4068	0.056273	0.86833
AGO4	0	1	9.5469e-06	4.17644e-06	0	0	0	0	0	0	15.2922	0.055878	0.870324
RABEP1	0	1	1.26574e-05	4.15818e-06	0	0	0	0	0	0	14.869	0.0544157	0.872254
ECE1	0	1	1.5787e-05	3.55329e-06	0	0	0	0	0	0	14.711	0.0538686	0.874101
AP2B1	0	1	1.53663e-05	3.82917e-06	0	0	0	0	0	0	14.6473	0.0536478	0.875863
AFF1	0	1	1.64846e-05	5.01412e-06	0	0	0	0	0	0	13.9992	0.051396	0.877595
SF3B3	0	1	1.40078e-05	5.8313e-06	0	0	0	0	0	0	13.9776	0.0513208	0.879248
SOS2	0	1	1.48173e-05	5.98957e-06	0	0	0	0	0	0	13.8099	0.0507364	0.88084
PAXIP1	0	1	1.94684e-05	5.25203e-06	0	0	0	0	0	0	13.5298	0.0497586	0.882382
STAG1	0	1	1.62716e-05	6.35018e-06	0	0	0	0	0	0	13.4839	0.049598	0.883861
CENPH	0	1	1.79018e-06	1.5265e-06	0	0	0	1	0	0	13.4372	0.049435	0.88528
KDM3A	0	1	1.8542e-05	6.12846e-06	0	0	0	0	0	0	13.2953	0.0489383	0.88665
KCTD18	0	1	6.0892e-06	1.60686e-06	0	0	0	1	0	0	12.8782	0.0474759	0.887995
ATP4B	1	0	5.29178e-06	1.20018e-06	1	0	0	0	0	0	12.8388	0.0473374	0.889288
ZNF423	0	1	2.91692e-05	4.12049e-06	0	0	0	0	0	0	12.8255	0.0472907	0.890532
FAM134B	0	1	5.36371e-06	2.03293e-06	0	0	0	1	0	0	12.802	0.0472084	0.891729
CSMD2	0	1	7.25472e-05	1.55014e-05	1	0	0	0	0	0	12.7403	0.0469915	0.892885
SEPT10	0	1	7.31784e-06	2.14815e-06	0	0	0	1	0	0	12.5289	0.0462477	0.894012
IL2RB	0	1	6.84856e-06	2.37197e-06	0	0	0	1	0	0	12.5001	0.0461463	0.8951
GK2	1	0	6.34752e-06	1.77024e-06	1	0	0	0	0	0	12.4903	0.0461118	0.89615
CASP2	0	1	7.82266e-06	2.10134e-06	0	0	0	1	0	0	12.4878	0.0461031	0.897163
KAT5	0	1	1.178e-05	2.74634e-06	0	0	0	1	0	0	11.8118	0.0437166	0.898182
FKBP10	1	0	1.28713e-05	2.34921e-06	1	0	0	0	0	0	11.445	0.0424166	0.899189
SACS	1	0	5.14467e-05	1.63704e-05	2	0	0	0	0	0	11.407	0.0422816	0.900165
ABCC1	0	1	3.56313e-05	6.61338e-06	0	0	0	0	0	0	11.2547	0.0417405	0.901117
HSPA4L	1	0	1.11887e-05	3.74457e-06	1	0	0	0	0	0	11.2127	0.0415914	0.902041
CUL3	1	0	1.25433e-05	3.46174e-06	1	0	0	0	0	0	11.1359	0.0413182	0.90294
LRCH1	1	0	1.3329e-05	3.50417e-06	1	0	0	0	0	0	11.0283	0.0409354	0.903817
LPIN1	0	1	1.62641e-05	4.66686e-06	0	0	0	1	0	0	10.71	0.0398011	0.904685
SYNPO2L	1	0	1.75008e-05	3.92929e-06	1	0	0	0	0	0	10.4187	0.0387602	0.905541
CCDC150	0	1	1.1029e-05	5.58918e-06	0	0	1	1	0	1	10.4118	0.0387357	0.906373
MAN2A2	0	1	1.87187e-05	5.18811e-06	0	0	0	1	0	0	10.3138	0.0383849	0.907186
POLR2B	0	1	1.98109e-05	5.57381e-06	0	0	0	1	0	0	10.0966	0.0376072	0.907986
GRIA1	1	0	2.09288e-05	4.16956e-06	1	0	0	0	0	0	9.97589	0.0371742	0.908769
ADAMTS14	0	1	2.12538e-05	5.79003e-06	0	0	0	1	0	0	9.90256	0.036911	0.909534
SLC22A5	1	0	8.98226e-06	2.2898e-06	0	0	1	0	0	0	9.74743	0.0363538	0.910286
CYP2S1	0	1	9.317e-06	1.99133e-06	0	0	0	2	0	0	9.70028	0.0361843	0.911019
PRRC2A	0	1	3.81961e-05	1.10047e-05	0	0	0	0	0	0	9.6745	0.0360916	0.911734
GIGYF1	1	0	2.10693e-05	5.47397e-06	1	0	0	0	0	0	9.6073	0.0358499	0.912433
LRRC30	0	0	4.23207e-06	9.01096e-07	3	0	0	0	0	0	9.56016	0.0356803	0.913115
AQP4	0	0	3.49058e-06	1.16153e-06	3	0	0	0	0	0	9.55679	0.0356681	0.91378
CCDC77	0	0	5.35894e-06	2.3955e-06	3	0	1	1	0	0	9.54541	0.0356272	0.914429
FN1	2	0	5.97643e-05	1.19656e-05	0	0	0	1	1	0	9.52781	0.0355639	0.915062
MAP3K7	1	0	9.98283e-06	2.94969e-06	0	0	1	0	0	0	9.46599	0.0353413	0.915682
LTN1	1	0	1.89705e-05	7.60068e-06	1	0	0	0	0	0	9.26513	0.0346173	0.916296
CPB1	0	0	5.89133e-06	1.96933e-06	3	0	0	0	0	0	9.13726	0.0341558	0.9169
NBEA	0	1	3.87294e-05	1.3311e-05	0	0	0	0	0	0	9.00344	0.0336725	0.917495
ADAMTS6	0	1	1.58319e-05	5.30775e-06	0	0	0	0	0	1	8.72594	0.0326686	0.918089
PLEKHH3	0	1	1.81913e-05	3.40763e-06	0	0	0	2	0	0	8.5755	0.0321234	0.918674
KMT2B	0	1	5.48402e-05	1.067e-05	0	0	0	0	0	0	8.46822	0.0317343	0.919251
FNDC3B	1	0	1.44768e-05	5.63417e-06	0	1	0	0	0	0	8.32775	0.0312243	0.91982
XYLT1	1	0	2.21762e-05	3.80388e-06	0	0	1	0	0	0	8.10454	0.0304129	0.920386
ZNF92	0	0	4.96322e-06	1.97224e-06	0	11	3	0	4	7	7.79736	0.0292939	0.920951
RIMS1	0	1	3.61982e-05	9.47816e-06	0	0	0	1	0	0	7.77984	0.02923	0.921505
WDR27	1	0	1.30722e-05	4.37498e-06	1	0	0	1	0	0	7.66717	0.0288189	0.922051
ANO7	0	0	1.71975e-05	4.61865e-06	3	0	0	0	0	0	7.65098	0.0287598	0.922585
ABCC8	0	1	2.11697e-05	7.02015e-06	0	0	0	2	0	0	7.50244	0.0282172	0.923114
DLGAP1	1	0	2.75816e-05	4.49722e-06	0	1	0	0	0	0	7.47109	0.0281026	0.923633
HINT1	1	0	1.10672e-06	4.96793e-07	0	0	0	0	0	0	6.83505	0.0257718	0.924166
WWC1	1	0	2.2139e-05	5.30435e-06	1	0	0	1	0	0	6.7779	0.0255618	0.92469
TMEM170B	1	0	1.88608e-06	4.95031e-07	0	0	0	0	0	0	6.77653	0.0255568	0.925203
LRRTM3	0	0	9.29024e-06	2.27603e-06	0	0	5	0	0	1	6.72559	0.0253695	0.925707
TMEM203	1	0	2.95427e-06	4.06036e-07	0	0	0	0	0	0	6.71349	0.0253251	0.926202
POLR2H	1	0	1.47999e-06	1.02405e-06	0	0	0	0	0	0	6.70727	0.0253022	0.926686
HIST1H1D	1	0	2.91439e-06	5.25338e-07	0	0	0	0	0	0	6.6941	0.0252537	0.927162
C2orf40	1	0	2.64547e-06	7.51978e-07	0	0	0	0	0	0	6.67167	0.0251713	0.92763
OR5AS1	1	0	2.64537e-06	8.64557e-07	0	0	0	0	0	0	6.65073	0.0250943	0.928089
ARL14EP	1	0	3.10855e-06	8.81704e-07	0	0	0	0	0	0	6.61356	0.0249575	0.92854
OR51M1	1	0	3.20379e-06	8.60345e-07	0	0	0	0	0	0	6.61054	0.0249464	0.928983
GCA	1	0	2.8429e-06	1.09242e-06	0	0	0	0	0	0	6.59412	0.0248859	0.929418
OR6P1	1	0	3.73159e-06	8.50543e-07	0	0	0	0	0	0	6.57388	0.0248115	0.929846
AGTR2	1	0	3.83317e-06	1.07538e-06	0	0	0	0	0	0	6.52541	0.024633	0.930268
PEMT	1	0	3.96286e-06	1.15141e-06	0	0	0	0	0	0	6.50225	0.0245478	0.930682
EXOSC7	1	0	3.51113e-06	1.36693e-06	0	0	0	0	0	0	6.4956	0.0245233	0.931089
IRAK1BP1	1	0	4.19346e-06	1.11222e-06	0	0	0	0	0	0	6.49282	0.024513	0.931489
DAPP1	1	0	3.80822e-06	1.26932e-06	0	0	0	0	0	0	6.49197	0.0245099	0.931882
APOA1	1	0	4.56704e-06	1.04076e-06	0	0	0	0	0	0	6.47902	0.0244622	0.932268
HRH4	1	0	3.66881e-06	1.4657e-06	0	0	0	0	0	0	6.46645	0.0244159	0.932648
ASIC5	1	0	2.62148e-06	1.90214e-06	0	0	0	0	0	0	6.46268	0.024402	0.933022
SPARC	1	0	4.29999e-06	1.2513e-06	0	0	0	0	0	0	6.46006	0.0243924	0.933389
BCDIN3D	1	0	4.21542e-06	1.31566e-06	0	0	0	0	0	0	6.45449	0.0243719	0.93375
GTF2H3	1	0	4.20258e-06	1.49907e-06	0	0	0	0	0	0	6.42246	0.0242538	0.934106
HOXC9	1	0	6.04502e-06	9.09881e-07	0	0	0	0	0	0	6.39773	0.0241627	0.934457
ZNF117	1	0	4.19981e-06	1.65737e-06	0	0	0	0	0	0	6.39436	0.0241503	0.934802
ELAVL2	1	0	4.8379e-06	1.42497e-06	0	0	0	0	0	0	6.3908	0.0241372	0.935141
FRZB	1	0	5.37985e-06	1.24895e-06	0	0	0	0	0	0	6.38402	0.0241122	0.935475
SLC7A6OS	1	0	5.23466e-06	1.33344e-06	0	0	0	0	0	0	6.37918	0.0240943	0.935804
PRSS27	1	0	5.57472e-06	1.26451e-06	0	0	0	0	0	0	6.36758	0.0240516	0.936127
SRSF9	1	0	6.17438e-06	1.07447e-06	0	0	0	0	0	0	6.35934	0.0240212	0.936446
HSD3B1	1	0	4.8314e-06	1.66152e-06	0	0	0	0	0	0	6.34923	0.0239839	0.93676
CYP2C9	1	0	5.30707e-06	1.68431e-06	0	0	0	0	0	0	6.31202	0.0238467	0.93707
PYHIN1	1	0	5.31665e-06	1.84677e-06	0	0	0	0	0	0	6.28283	0.0237391	0.937377
ALKBH1	1	0	6.05225e-06	1.59127e-06	0	0	0	0	0	0	6.27672	0.0237165	0.937678
ENDOG	1	0	7.61134e-06	1.04902e-06	0	0	0	0	0	0	6.26423	0.0236704	0.937976
CNPPD1	1	0	5.30566e-06	1.96658e-06	0	0	0	0	0	0	6.26265	0.0236646	0.938268
EFNB3	1	0	6.45993e-06	1.5326e-06	0	0	0	0	0	0	6.25889	0.0236507	0.938557
ISL1	1	0	6.93658e-06	1.4416e-06	0	0	0	0	0	0	6.24202	0.0235885	0.938841
GGT6	1	0	6.76601e-06	1.54279e-06	0	0	0	0	0	0	6.2361	0.0235666	0.939122
EDNRA	1	0	7.15934e-06	1.66602e-06	0	0	0	0	0	0	6.18793	0.0233889	0.9394
KDM4E	1	0	6.65376e-06	1.867e-06	0	0	0	0	0	0	6.18761	0.0233877	0.939673
FAM131A	1	0	6.59228e-06	1.89279e-06	0	0	0	0	0	0	6.18734	0.0233867	0.939943
B4GALT1	1	0	7.77453e-06	1.45581e-06	0	0	0	0	0	0	6.18245	0.0233686	0.940209
UBAP1	1	0	6.59666e-06	1.92532e-06	0	0	0	0	0	0	6.18144	0.0233649	0.940471
TOX	1	0	6.44273e-06	2.04763e-06	0	0	0	0	0	0	6.17083	0.0233257	0.940729
EME1	1	0	5.87008e-06	2.3006e-06	0	0	0	0	0	0	6.16621	0.0233087	0.940984
CTGF	1	0	8.05783e-06	1.4713e-06	0	0	0	0	0	0	6.16062	0.0232881	0.941236
MTRF1	1	0	5.69181e-06	2.44969e-06	0	0	0	0	0	0	6.15272	0.0232589	0.941484
GPR61	1	0	7.7822e-06	1.64328e-06	0	0	0	0	0	0	6.14969	0.0232477	0.941729
GOPC	1	0	6.77841e-06	2.11227e-06	0	0	0	0	0	0	6.13705	0.023201	0.941971
EIF3G	1	0	8.79936e-06	1.36579e-06	0	0	0	0	0	0	6.12882	0.0231706	0.94221
FMO3	1	0	7.25881e-06	2.0323e-06	0	0	0	0	0	0	6.11839	0.0231321	0.942446
ZNF613	1	0	6.38576e-06	2.38104e-06	0	0	0	0	0	0	6.11762	0.0231293	0.942678
PLEKHO2	1	0	7.14996e-06	2.12381e-06	0	0	0	0	0	0	6.1101	0.0231015	0.942908
PPP1R15B	1	0	6.62053e-06	2.54705e-06	0	0	0	0	0	0	6.07372	0.0229671	0.943135
RRAD	1	0	1.00843e-05	1.20131e-06	0	0	0	0	0	0	6.07118	0.0229577	0.94336
MAP2K2	1	0	9.08687e-06	1.73492e-06	0	0	0	0	0	0	6.047	0.0228684	0.943582
CNGA1	1	0	5.75632e-06	3.2578e-06	0	0	0	0	0	0	6.01168	0.0227378	0.943802
SAPCD2	1	0	9.64491e-06	1.76427e-06	0	0	0	0	0	0	6.00532	0.0227143	0.94402
KBTBD8	1	0	8.12449e-06	2.38623e-06	0	0	0	0	0	0	6.00114	0.0226989	0.944234
TRAF4	1	0	9.21527e-06	1.9788e-06	0	0	0	0	0	0	5.99761	0.0226858	0.944447
SLC25A23	1	0	8.91771e-06	2.10995e-06	0	0	0	0	0	0	5.99521	0.022677	0.944656
CD2AP	1	0	6.61934e-06	3.0263e-06	0	0	0	0	0	0	5.99335	0.0226701	0.944863
ZNF385A	1	0	9.13959e-06	2.04026e-06	0	0	0	0	0	0	5.9923	0.0226662	0.945067
ADCK2	1	0	8.04058e-06	2.47527e-06	0	0	0	0	0	0	5.99178	0.0226643	0.945269
WFIKKN2	1	0	9.96432e-06	1.91483e-06	0	0	0	0	0	0	5.95935	0.0225444	0.945469
KIF7	1	0	3.25536e-05	6.06193e-06	1	0	0	1	0	0	5.94615	0.0224956	0.945666
ZBTB1	1	0	8.17583e-06	2.72218e-06	0	0	0	0	0	0	5.94194	0.02248	0.945862
ZNF205	1	0	9.97459e-06	2.08852e-06	0	0	0	0	0	0	5.92991	0.0224355	0.946055
USP1	1	0	7.9828e-06	2.8765e-06	0	0	0	0	0	0	5.92901	0.0224322	0.946246
PPHLN1	1	0	8.12061e-06	2.89347e-06	0	0	0	0	0	0	5.91727	0.0223887	0.946435
CSPG5	1	0	1.07435e-05	1.88485e-06	0	0	0	0	0	0	5.91386	0.0223761	0.946622
SPRED2	1	0	1.09409e-05	1.8609e-06	0	0	0	0	0	0	5.90509	0.0223437	0.946806
RBFOX1	0	0	1.51096e-05	2.73999e-06	0	3	2	0	0	1	5.89969	0.0223237	0.946989
COG8	1	0	1.02318e-05	2.20067e-06	0	0	0	0	0	0	5.89485	0.0223058	0.94717
GAN	1	0	8.83289e-06	2.81306e-06	0	0	0	0	0	0	5.88445	0.0222673	0.947348
PUF60	1	0	1.00759e-05	2.34043e-06	0	0	0	0	0	0	5.88194	0.022258	0.947525
POGK	1	0	9.83325e-06	2.447e-06	0	0	0	0	0	0	5.88007	0.0222511	0.9477
FRMD7	1	0	8.85478e-06	2.84726e-06	0	0	0	0	0	0	5.87745	0.0222414	0.947873
FBXW9	1	0	1.08835e-05	2.18382e-06	0	0	0	0	0	0	5.85585	0.0221615	0.948044
KIAA0930	1	0	1.20615e-05	1.77141e-06	0	0	0	0	0	0	5.84808	0.0221328	0.948213
KIAA0895L	1	0	1.18455e-05	1.93741e-06	0	0	0	0	0	0	5.83477	0.0220835	0.948381
TUBB3	1	0	1.27785e-05	1.5972e-06	0	0	0	0	0	0	5.83096	0.0220694	0.948547
LRGUK	1	0	7.78279e-06	3.78015e-06	0	0	0	0	0	0	5.79464	0.0219349	0.948712
CPEB1	1	0	1.01999e-05	2.90419e-06	0	0	0	0	0	0	5.78254	0.0218901	0.948875
ARSD	1	0	1.11556e-05	2.53885e-06	0	0	0	0	0	0	5.78109	0.0218848	0.949037
SLC34A2	1	0	1.10988e-05	2.5643e-06	0	0	0	0	0	0	5.78057	0.0218828	0.949197
SOX13	1	0	1.12673e-05	2.68322e-06	0	0	0	0	0	0	5.75091	0.021773	0.949355
NR1H2	1	0	1.3238e-05	1.91796e-06	0	0	0	0	0	0	5.7503	0.0217708	0.949512
AMDHD2	1	0	1.25677e-05	2.23615e-06	0	0	0	0	0	0	5.74117	0.0217369	0.949668
SH2D3A	1	0	1.25837e-05	2.40814e-06	0	0	0	0	0	0	5.71275	0.0216316	0.949822
CAMK2A	1	0	1.21656e-05	2.66779e-06	0	0	0	0	0	0	5.69743	0.0215749	0.949975
TPX2	1	0	9.83877e-06	3.59313e-06	0	0	0	0	0	0	5.69526	0.0215669	0.950126
PRDM8	1	0	1.34998e-05	2.34747e-06	0	0	0	0	0	0	5.6658	0.0214577	0.950277
CYP2C18	1	0	6.93892e-06	1.75274e-06	0	3	0	0	3	0	5.65975	0.0214353	0.950426
NOA1	1	0	1.26954e-05	2.89981e-06	0	0	0	0	0	0	5.62827	0.0213186	0.950573
QSOX2	1	0	1.2281e-05	3.06329e-06	0	0	0	0	0	0	5.62802	0.0213177	0.95072
AKAP1	1	0	1.13357e-05	3.43407e-06	0	0	0	0	0	0	5.62788	0.0213171	0.950865
TTC27	1	0	1.00123e-05	4.06758e-06	0	0	0	0	0	0	5.6101	0.0212512	0.951008
LARP4B	1	0	1.15986e-05	3.47155e-06	0	0	0	0	0	0	5.60596	0.0212359	0.951151
PIK3CG	1	0	1.06539e-05	4.20449e-06	0	0	0	0	0	0	5.54984	0.0210278	0.951293
TRIM41	1	0	1.45194e-05	2.87493e-06	0	0	0	0	0	0	5.52192	0.0209242	0.951434
CDH16	1	0	1.27376e-05	3.5757e-06	0	0	0	0	0	0	5.52099	0.0209207	0.951573
CTCF	1	0	1.44597e-05	2.94399e-06	0	0	0	0	0	0	5.51488	0.0208981	0.951712
FBN2	1	0	5.54708e-05	1.29842e-05	1	0	0	0	0	0	5.47517	0.0207507	0.951849
JADE2	1	0	1.38473e-05	3.48667e-06	0	0	0	0	0	0	5.46845	0.0207258	0.951986
UBASH3B	1	0	1.05985e-05	3.08009e-06	0	0	1	0	0	1	5.45601	0.0206796	0.952121
SLC6A9	1	0	1.55167e-05	2.94543e-06	0	0	0	0	0	0	5.452	0.0206647	0.952255
AP1G1	1	0	1.20264e-05	4.37054e-06	0	0	0	0	0	0	5.44241	0.0206291	0.952388
SGIP1	1	0	1.391e-05	3.87775e-06	0	0	0	0	0	0	5.4057	0.0204928	0.95252
MMP15	1	0	1.5969e-05	3.07662e-06	0	0	0	0	0	0	5.40569	0.0204928	0.952651
CACNB1	1	0	1.59671e-05	3.17714e-06	0	0	0	0	0	0	5.39072	0.0204372	0.952781
SNX18	1	0	1.74898e-05	2.5886e-06	0	0	0	0	0	0	5.39053	0.0204365	0.95291
BANP	1	0	1.74395e-05	2.63979e-06	0	0	0	0	0	0	5.38577	0.0204188	0.953038
KIFC2	1	0	1.44362e-05	3.8413e-06	0	0	0	0	0	0	5.38043	0.020399	0.953164
C9orf3	1	0	1.48346e-05	3.70754e-06	0	0	0	0	0	0	5.37723	0.0203871	0.95329
ZNRF3	1	0	1.61992e-05	3.29354e-06	0	0	0	0	0	0	5.35986	0.0203226	0.953414
AFAP1L1	1	0	1.49023e-05	3.90907e-06	0	0	0	0	0	0	5.34331	0.0202611	0.953538
PHF20	1	0	1.46225e-05	4.19159e-06	0	0	0	0	0	0	5.31764	0.0201657	0.953661
SNX13	1	0	1.32643e-05	4.78437e-06	0	0	0	0	0	0	5.30848	0.0201317	0.953783
GIT1	1	0	1.62429e-05	3.67659e-06	0	0	0	0	0	0	5.30063	0.0201025	0.953903
FLYWCH1	1	0	1.83834e-05	2.98422e-06	0	0	0	0	0	0	5.28055	0.0200279	0.954024
AFAP1	1	0	1.74737e-05	3.4312e-06	0	0	0	0	0	0	5.2666	0.019976	0.954143
ATP1A1	1	0	1.49496e-05	4.48868e-06	0	0	0	0	0	0	5.25538	0.0199343	0.954261
SH3BP4	1	0	1.82716e-05	3.22015e-06	0	0	0	0	0	0	5.25233	0.019923	0.954379
ZCCHC14	1	0	1.82184e-05	3.39259e-06	0	0	0	0	0	0	5.23021	0.0198407	0.954495
LDB3	1	0	1.89634e-05	3.32215e-06	0	0	0	0	0	0	5.1987	0.0197236	0.954611
AKAP13	0	0	3.51459e-05	1.13202e-05	1	0	3	0	0	0	5.18912	0.0196879	0.954727
PHF20L1	1	0	1.55731e-05	4.72893e-06	0	0	0	0	0	0	5.18544	0.0196743	0.954841
PRPF40A	1	0	1.61915e-05	4.82763e-06	0	0	0	0	0	0	5.13688	0.0194936	0.954955
ZNF592	1	0	1.83918e-05	4.11138e-06	0	0	0	0	0	0	5.1173	0.0194208	0.955068
HECTD3	1	0	1.87842e-05	4.01153e-06	0	0	0	0	0	0	5.10993	0.0193933	0.955181
KIF17	1	0	1.95386e-05	3.81833e-06	0	0	0	0	0	0	5.09601	0.0193415	0.955293
SPINK5	0	0	1.51471e-05	5.71555e-06	1	3	0	1	0	0	5.04696	0.0191589	0.955404
TP53BP2	1	0	1.87198e-05	4.849e-06	0	0	0	0	0	0	4.99607	0.0189694	0.955516
OPA1	1	0	1.71699e-05	5.46052e-06	0	0	0	0	0	0	4.9947	0.0189643	0.955626
BNIP3	1	0	3.58194e-06	9.21614e-07	0	0	0	1	0	0	4.96633	0.0188586	0.955736
LAMB3	1	0	1.83274e-05	5.22038e-06	0	0	0	0	0	0	4.96581	0.0188567	0.955845
MORN3	1	0	4.21332e-06	1.16789e-06	0	0	0	1	0	0	4.89802	0.018604	0.955954
A2M	1	0	1.59601e-05	6.70046e-06	0	0	0	0	0	0	4.88975	0.0185732	0.956063
TCERG1	1	0	1.98133e-05	5.80858e-06	0	0	0	0	0	0	4.80839	0.0182698	0.956171
GBGT1	1	0	5.01469e-06	1.58454e-06	0	0	0	1	0	0	4.79881	0.0182341	0.956279
OPN1SW	1	0	5.89072e-06	1.24492e-06	0	0	0	1	0	0	4.79798	0.018231	0.956386
SNUPN	1	0	4.93306e-06	1.71057e-06	0	0	0	1	0	0	4.78628	0.0181873	0.956493
PACS2	1	0	2.4797e-05	4.13096e-06	0	0	0	0	0	0	4.77652	0.0181509	0.956599
MEP1B	0	0	8.58895e-06	3.21286e-06	2	2	0	2	0	0	4.7759	0.0181486	0.956703
ATP1A3	1	0	2.45328e-05	4.25662e-06	0	0	0	0	0	0	4.77325	0.0181387	0.956807
PITPNC1	1	0	5.30271e-06	1.92367e-06	0	0	0	1	0	0	4.73859	0.0180094	0.956911
DHX34	1	0	2.39282e-05	4.83928e-06	0	0	0	0	0	0	4.72702	0.0179662	0.957014
KIF26A	1	0	3.89297e-05	6.9079e-06	0	0	1	1	0	0	4.71414	0.0179181	0.957116
PDS5B	1	0	1.89679e-05	6.86711e-06	0	0	0	0	0	0	4.71231	0.0179113	0.957218
DGAT2	1	0	6.35559e-06	1.93587e-06	0	0	0	1	0	0	4.68242	0.0177997	0.957319
EPB41L3	1	0	2.4736e-05	4.91746e-06	0	0	0	0	0	0	4.67651	0.0177776	0.957419
PEAK1	1	0	2.15468e-05	6.60635e-06	0	0	0	0	0	0	4.61715	0.0175559	0.95752
SETBP1	1	0	2.45483e-05	5.64966e-06	0	0	0	0	0	0	4.5918	0.0174612	0.95762
EPHB4	1	0	2.78509e-05	4.69744e-06	0	0	0	0	0	0	4.55258	0.0173147	0.95772
MST1R	0	0	2.39362e-05	5.35594e-06	3	0	0	1	0	0	4.53779	0.0172594	0.957819
HDLBP	1	0	2.58229e-05	5.61778e-06	0	0	0	0	0	0	4.53416	0.0172458	0.957918
TMEM102	1	0	1.06579e-05	1.861e-06	0	0	0	1	0	0	4.47633	0.0170296	0.958016
ASPM	0	0	4.4462e-05	1.54962e-05	3	0	0	0	0	0	4.46001	0.0169686	0.958114
KRT2	1	0	9.84017e-06	2.35045e-06	0	0	0	1	0	0	4.45528	0.0169509	0.958212
ABHD16B	1	0	1.2048e-05	1.61351e-06	0	0	0	1	0	0	4.43963	0.0168923	0.958309
BANK1	1	0	7.07962e-06	3.59053e-06	0	0	0	1	0	0	4.4363	0.0168799	0.958405
SLC9A8	1	0	9.79503e-06	2.53215e-06	0	0	0	1	0	0	4.43498	0.016875	0.9585
ERAP2	1	0	6.43758e-06	3.93395e-06	0	0	0	1	0	0	4.4253	0.0168387	0.958595
ABCD2	1	0	9.43608e-06	2.81381e-06	0	0	0	1	0	0	4.41764	0.0168101	0.958689
IRF5	1	0	1.10781e-05	2.22367e-06	0	0	0	1	0	0	4.41109	0.0167856	0.958783
QRICH2	0	0	2.31863e-05	6.64026e-06	3	0	0	1	0	0	4.40907	0.016778	0.958876
KLC3	1	0	1.15042e-05	2.22894e-06	0	0	0	1	0	0	4.39002	0.0167067	0.958968
PGS1	1	0	1.12249e-05	2.40458e-06	0	0	0	1	0	0	4.38191	0.0166764	0.95906
GOLGA3	1	0	2.67183e-05	6.66979e-06	0	0	0	0	0	0	4.36269	0.0166045	0.959152
ZZEF1	1	0	4.4308e-05	1.30763e-05	1	0	0	1	0	0	4.34316	0.0165314	0.959243
DLC1	1	0	2.80878e-05	6.39876e-06	0	0	0	0	0	0	4.33238	0.016491	0.959333
VIT	0	0	1.30726e-05	3.20013e-06	1	1	1	0	0	0	4.27588	0.0162794	0.959424
SYNGAP1	1	0	3.13154e-05	5.82501e-06	0	0	0	0	0	0	4.2548	0.0162005	0.959514
JAG2	1	0	3.19505e-05	5.61405e-06	0	0	0	0	0	0	4.25133	0.0161875	0.959604
SNX25	1	0	1.05893e-05	3.74396e-06	0	0	0	1	0	0	4.25105	0.0161864	0.959693
CAMK2G	1	0	1.39037e-05	3.06686e-06	0	0	0	1	0	0	4.17854	0.0159147	0.959782
CDH5	1	0	1.36771e-05	3.16393e-06	0	0	0	1	0	0	4.17752	0.0159109	0.959871
C9orf152	0	0	1.83927e-06	8.78503e-07	2	0	0	0	0	0	4.17288	0.0158935	0.959959
RNF10	1	0	1.34412e-05	3.38386e-06	0	0	0	1	0	0	4.16269	0.0158553	0.960047
EXT2	1	0	1.33801e-05	3.53095e-06	0	0	0	1	0	0	4.14846	0.015802	0.960134
GPLD1	1	0	1.18549e-05	4.13426e-06	0	0	0	1	0	0	4.14768	0.0157991	0.96022
EIF4G3	1	0	2.98404e-05	7.3404e-06	0	0	0	0	0	0	4.14407	0.0157855	0.960306
RGS9	1	0	1.19927e-05	4.11754e-06	0	0	0	1	0	0	4.14339	0.015783	0.960392
EMILIN2	1	0	1.27001e-05	3.85334e-06	0	0	0	1	0	0	4.14193	0.0157775	0.960477
MYH3	1	0	2.54423e-05	9.06719e-06	0	0	0	0	0	0	4.13942	0.0157681	0.960561
PPFIA3	1	0	3.50443e-05	5.5596e-06	0	0	0	0	0	0	4.12245	0.0157045	0.960645
TMEM190	0	0	3.1766e-06	8.78948e-07	2	0	0	0	0	0	4.12094	0.0156988	0.960728
ABCD3	1	0	1.24063e-05	4.15967e-06	0	0	0	1	0	0	4.11999	0.0156952	0.960811
GPR1	0	0	3.38161e-06	1.05753e-06	2	0	0	0	0	0	4.0926	0.0155925	0.960893
COL4A6	1	0	3.0025e-05	7.73686e-06	0	0	0	0	0	0	4.09109	0.0155869	0.960975
RITA1	0	0	2.98739e-06	1.23325e-06	2	0	0	0	0	0	4.0876	0.0155738	0.961057
PAMR1	0	0	1.32452e-05	3.43068e-06	1	3	0	0	1	0	4.08742	0.0155731	0.961138
NSMF	1	0	1.67417e-05	2.77458e-06	0	0	0	1	0	0	4.08544	0.0155657	0.961218
RNF148	0	0	3.57338e-06	1.07393e-06	2	0	0	0	0	0	4.08341	0.015558	0.961298
ARAP3	1	0	3.27276e-05	6.85926e-06	0	0	0	0	0	0	4.07428	0.0155238	0.961377
TDRD5	1	0	1.20713e-05	4.75914e-06	0	0	0	1	0	0	4.06684	0.0154959	0.961456
DOCK11	1	0	2.60701e-05	9.61056e-06	0	0	0	0	0	0	4.05107	0.0154367	0.961535
PITPNM2	1	0	3.75574e-05	5.36674e-06	0	0	0	0	0	0	4.03778	0.0153869	0.961613
MSANTD4	0	0	2.99157e-06	1.77759e-06	2	0	0	0	0	0	4.02585	0.0153421	0.961691
TM2D3	0	0	5.94569e-06	9.91681e-07	2	0	0	0	0	0	4.00336	0.0152577	0.961768
NANS	0	0	5.12446e-06	1.34701e-06	2	0	0	0	0	0	3.99424	0.0152235	0.961845
KIAA1109	0	1	7.30295e-05	2.19139e-05	0	0	0	1	0	0	3.97406	0.0151477	0.961922
COL9A2	1	0	1.65544e-05	3.93331e-06	0	0	0	1	0	0	3.96397	0.0151099	0.961999
SAMD15	0	0	3.54946e-06	2.29065e-06	2	0	0	0	0	0	3.94808	0.0150502	0.962075
ITM2C	1	0	7.01779e-06	1.27632e-06	0	0	0	0	1	0	3.94494	0.0150384	0.962151
JAK2	1	0	1.40436e-05	5.28307e-06	0	0	0	1	0	0	3.92338	0.0149575	0.962227
NMUR1	0	0	6.75298e-06	1.52624e-06	2	0	0	0	0	0	3.91463	0.0149246	0.962302
GP1BA	0	0	6.23069e-06	1.88122e-06	2	0	0	0	0	0	3.89492	0.0148505	0.962377
GYS1	1	0	1.95018e-05	3.52846e-06	0	0	0	1	0	0	3.88379	0.0148088	0.962451
SIGLEC15	0	0	8.83619e-06	1.22199e-06	2	0	0	0	0	0	3.8726	0.0147667	0.962525
TRIM55	0	0	5.23085e-06	2.4374e-06	2	0	0	0	0	0	3.87084	0.0147601	0.962599
KIAA0391	0	0	5.69078e-06	2.37193e-06	2	0	0	0	0	0	3.86135	0.0147245	0.962673
KRT73	0	0	7.00255e-06	2.00999e-06	2	0	0	0	0	0	3.85327	0.0146941	0.962746
ASB14	0	0	6.51437e-06	2.22298e-06	2	0	0	0	0	0	3.84786	0.0146737	0.962818
SPECC1	1	0	1.88036e-05	4.35384e-06	0	0	0	1	0	0	3.82435	0.0145854	0.962891
C16orf58	0	0	7.21966e-06	2.20831e-06	2	0	0	0	0	0	3.82433	0.0145853	0.962963
SELE	0	0	6.47015e-06	2.59148e-06	2	0	0	0	0	0	3.81014	0.014532	0.963034
SPARCL1	0	0	6.97533e-06	2.48946e-06	2	0	0	0	0	0	3.80311	0.0145056	0.963106
GDAP2	0	0	7.1382e-06	2.64966e-06	2	0	0	0	0	0	3.78048	0.0144205	0.963177
ZNF778	0	0	6.72253e-06	2.84596e-06	2	0	0	0	0	0	3.77441	0.0143977	0.963247
CABIN1	1	0	3.96927e-05	8.90464e-06	1	0	0	2	0	0	3.76583	0.0143654	0.963318
PGM3	0	0	7.13402e-06	2.80585e-06	2	0	0	0	0	0	3.76423	0.0143594	0.963388
CDC14A	0	0	6.94003e-06	2.89447e-06	2	0	0	0	0	0	3.76172	0.01435	0.963457
ZNF16	0	0	7.82735e-06	2.63761e-06	2	0	0	0	0	0	3.75768	0.0143348	0.963527
ZBTB24	0	0	8.82951e-06	2.6453e-06	2	0	0	0	0	0	3.72222	0.0142015	0.963596
MTUS1	0	0	1.39504e-05	5.41854e-06	3	1	0	3	0	0	3.72095	0.0141967	0.963664
EVPL	1	0	3.7682e-05	8.3301e-06	0	0	0	0	0	0	3.71586	0.0141775	0.963733
TMEM161A	0	0	9.9449e-06	2.37951e-06	2	0	0	0	0	0	3.71147	0.014161	0.963801
ABCB10	0	0	8.43245e-06	2.88484e-06	2	0	0	0	0	0	3.71109	0.0141596	0.963868
HCFC1	1	0	4.04803e-05	7.43059e-06	0	0	0	0	0	0	3.70056	0.01412	0.963936
SIN3A	1	0	1.84411e-05	5.75742e-06	0	0	0	1	0	0	3.69287	0.014091	0.964003
SMPD1	0	0	1.03831e-05	2.49713e-06	2	0	0	0	0	0	3.68443	0.0140593	0.964069
NLRP9	0	0	7.15638e-06	3.7022e-06	2	0	0	0	0	0	3.67084	0.0140082	0.964136
MFSD12	0	0	1.22971e-05	2.15404e-06	2	0	0	0	0	0	3.65492	0.0139483	0.964202
PXK	0	0	8.94948e-06	3.26425e-06	2	0	0	0	0	0	3.65464	0.0139472	0.964268
NLRP14	0	0	7.43326e-06	3.82512e-06	2	0	0	0	0	0	3.64896	0.0139258	0.964333
CEP95	0	0	7.51853e-06	3.93841e-06	2	0	0	0	0	0	3.63463	0.0138719	0.964399
BBS1	0	0	1.14651e-05	2.85675e-06	2	0	0	0	0	0	3.61161	0.0137852	0.964464
ZFYVE26	0	0	3.4732e-05	1.03727e-05	3	0	0	1	0	0	3.59101	0.0137077	0.964529
SCNN1D	0	0	1.1461e-05	3.30488e-06	2	0	0	0	0	0	3.56702	0.0136174	0.964594
TBC1D4	1	0	2.29563e-05	5.55908e-06	0	0	0	1	0	0	3.53817	0.0135087	0.964658
POLD1	1	0	2.5926e-05	4.62592e-06	0	0	0	1	0	0	3.51812	0.0134332	0.964723
LRIG2	0	0	9.00242e-06	4.63238e-06	2	0	0	0	0	0	3.51673	0.013428	0.964787
SCRIB	1	0	4.8086e-05	6.57843e-06	0	0	0	0	0	0	3.50501	0.0133838	0.964851
SMTN	1	0	2.48239e-05	5.20059e-06	0	0	0	1	0	0	3.50322	0.0133771	0.964915
PARD3	0	0	3.00164e-05	6.78721e-06	1	0	2	0	0	0	3.48682	0.0133153	0.964978
VPS8	1	0	2.06426e-05	7.1785e-06	0	0	0	1	0	0	3.46793	0.0132441	0.965042
MED12L	1	0	3.93228e-05	1.02562e-05	0	0	0	0	0	0	3.46509	0.0132334	0.965105
RTEL1	1	0	2.27225e-05	6.42518e-06	0	0	0	1	0	0	3.46306	0.0132258	0.965167
ZBTB20	0	0	1.72802e-05	2.50621e-06	2	0	0	0	0	0	3.45829	0.0132078	0.96523
COL5A1	1	0	4.2731e-05	9.18084e-06	0	0	0	0	0	0	3.44587	0.013161	0.965292
APOBR	1	0	8.69888e-06	3.67175e-06	0	0	0	2	0	0	3.41358	0.0130392	0.965354
TSC2	1	0	4.82606e-05	7.55874e-06	0	0	0	0	0	0	3.40544	0.0130086	0.965416
COL18A1	0	0	2.94967e-05	7.48891e-06	1	2	0	0	0	0	3.39699	0.0129767	0.965477
MED12	1	0	4.24448e-05	1.02586e-05	0	0	0	0	0	0	3.35526	0.0128193	0.965539
RHOT2	1	0	1.22709e-05	3.01207e-06	0	0	0	2	0	0	3.34392	0.0127765	0.9656
SPATA5	1	0	1.09969e-05	3.85074e-06	0	0	0	2	0	0	3.31249	0.012658	0.965662
LATS2	0	0	1.84115e-05	3.97875e-06	2	0	0	0	0	0	3.28568	0.0125568	0.965723
CHRNA7	0	0	1.05597e-05	2.12006e-06	0	0	6	0	0	3	3.25199	0.0124297	0.965784
RBM20	1	0	1.46406e-05	4.57634e-06	0	1	0	0	2	0	3.24403	0.0123996	0.965846
NRXN2	1	0	5.49594e-05	6.9528e-06	0	0	0	0	0	0	3.23645	0.012371	0.965906
KIF14	0	0	1.24179e-05	6.9282e-06	2	0	0	0	0	0	3.19822	0.0122267	0.965967
MRVI1	1	0	1.42373e-05	3.99386e-06	0	0	0	2	0	0	3.18527	0.0121778	0.966028
DOCK5	1	0	2.39618e-05	9.12273e-06	0	0	0	1	0	0	3.1729	0.0121311	0.966089
FUK	0	0	2.03994e-05	4.61484e-06	2	0	0	0	0	0	3.17067	0.0121226	0.966149
ABCB4	0	0	1.72227e-05	5.80849e-06	2	0	0	0	0	0	3.15714	0.0120715	0.966209
LPIN2	1	0	1.46564e-05	4.25191e-06	0	0	0	2	0	0	3.14823	0.0120379	0.966268
TMEM261	0	0	2.36579e-06	3.85346e-07	1	1	0	0	0	0	3.12311	0.011943	0.966328
PLEKHG1	1	0	1.80569e-05	5.20477e-06	0	0	0	0	0	1	3.11414	0.011909	0.966388
CACNA1E	1	0	5.00069e-05	1.06522e-05	0	0	0	0	0	0	3.07302	0.0117537	0.966447
OBSL1	1	0	5.77179e-05	8.14967e-06	0	0	0	0	0	0	3.04617	0.0116521	0.966507
SLC22A9	1	0	5.78882e-06	2.09087e-06	0	0	0	3	0	0	2.9927	0.01145	0.966566
GNPTAB	1	0	1.64391e-05	5.42216e-06	0	0	0	2	0	0	2.98967	0.0114385	0.966626
SLC12A4	0	0	2.68234e-05	5.23679e-06	2	0	0	0	0	0	2.94193	0.0112579	0.966685
DNAH10	0	1	6.78273e-05	1.89764e-05	0	0	0	3	0	0	2.87847	0.0110177	0.966745
CALCR	0	0	6.37637e-06	2.52603e-06	1	0	1	0	0	0	2.84777	0.0109015	0.966805
PTPRS	1	0	6.40286e-05	8.37655e-06	0	0	0	0	0	0	2.84343	0.0108851	0.966865
FBN1	1	0	4.97806e-05	1.36073e-05	0	0	0	0	0	0	2.84119	0.0108766	0.966924
SLCO4A1	0	0	7.06098e-06	2.76653e-06	1	0	1	0	0	0	2.81087	0.0107618	0.966984
LRRC17	0	0	5.48542e-06	1.71643e-06	2	0	0	1	0	0	2.65437	0.0101687	0.967044
ZNF431	0	0	4.09856e-06	2.18844e-06	2	0	0	1	0	0	2.65374	0.0101663	0.967105
SLC38A8	0	0	7.05417e-06	1.79379e-06	2	0	0	1	0	0	2.61035	0.0100017	0.967165
FPR3	0	0	3.16787e-06	1.07079e-06	0	0	2	0	0	0	2.60034	0.00996375	0.967225
LMOD2	0	0	7.21774e-06	1.96084e-06	2	0	0	1	0	0	2.59429	0.0099408	0.967285
CDC42BPG	0	0	3.58438e-05	7.10086e-06	2	0	0	0	0	0	2.58003	0.0098867	0.967345
DNTTIP2	0	0	5.35954e-06	2.93962e-06	2	0	0	1	0	0	2.56848	0.00984289	0.967404
SSX2IP	0	0	5.23297e-06	2.99228e-06	2	0	0	1	0	0	2.56774	0.0098401	0.967464
KALRN	1	0	6.25142e-05	1.29454e-05	0	0	0	0	0	0	2.5467	0.00976025	0.967523
LAMB2	0	0	3.38772e-05	8.29371e-06	2	0	0	0	0	0	2.54009	0.00973514	0.967582
ST6GALNAC3	0	0	4.22127e-06	1.33143e-06	0	2	0	0	0	0	2.52738	0.00968692	0.967641
KLHL17	1	0	1.95273e-05	2.85302e-06	0	0	0	3	0	0	2.52379	0.00967329	0.967699
COL6A3	1	0	6.70096e-05	1.23901e-05	0	0	0	0	0	0	2.47355	0.00948254	0.967758
HERC5	0	0	6.2964e-06	4.10284e-06	2	0	0	1	0	0	2.46525	0.00945101	0.967816
CACNA1A	1	0	7.0043e-05	1.19305e-05	0	0	0	0	0	0	2.43152	0.00932292	0.967875
CCDC14	0	0	8.80737e-06	3.91768e-06	2	0	0	1	0	0	2.42099	0.00928291	0.967933
PTPRN2	0	0	1.98362e-05	4.49506e-06	1	0	1	0	0	0	2.38341	0.00914014	0.967991
TTC21B	0	0	1.55588e-05	6.0835e-06	1	0	1	0	0	0	2.37117	0.00909364	0.968049
ECT2	0	0	1.07973e-05	4.41374e-06	2	0	0	1	0	0	2.34448	0.0089922	0.968107
TAS1R3	0	0	1.52147e-05	2.99811e-06	2	0	0	1	0	0	2.34177	0.00898189	0.968165
CHN2	0	0	1.12313e-05	2.22234e-06	0	0	2	0	0	0	2.33683	0.00896313	0.968223
CENPJ	0	0	1.15538e-05	5.66627e-06	3	0	0	3	0	0	2.32132	0.00890417	0.96828
KIAA1462	0	0	1.33191e-05	4.78491e-06	2	0	0	1	0	0	2.26738	0.00869906	0.968338
KIF24	0	0	1.3134e-05	5.16353e-06	2	0	0	1	0	0	2.24753	0.00862355	0.968396
CLCN1	0	0	1.64591e-05	4.19002e-06	2	0	0	1	0	0	2.23996	0.00859477	0.968453
TNC	1	0	3.719e-05	8.42744e-06	0	0	0	2	0	0	2.20975	0.00847984	0.96851
SRBD1	0	0	1.0991e-05	4.45557e-06	0	0	2	0	0	0	2.20106	0.00844676	0.968568
MYO7B	1	0	3.75652e-05	9.49548e-06	0	0	0	2	0	0	2.1375	0.00820483	0.968625
ITSN1	1	0	4.01181e-05	8.70161e-06	0	0	0	2	0	0	2.12776	0.00816777	0.968682
ATP2C2	0	0	1.73056e-05	4.25956e-06	2	1	0	1	1	0	2.12629	0.00816215	0.968739
UGGT2	0	0	1.63156e-05	6.70433e-06	2	0	0	1	0	0	2.09212	0.00803204	0.968797
EVC2	0	0	1.33061e-05	5.86468e-06	0	2	0	0	0	0	2.04893	0.00786755	0.968854
ATP8B2	0	0	2.28557e-05	5.33454e-06	2	0	0	1	0	0	2.04806	0.00786424	0.968911
ATP10A	0	0	2.0272e-05	6.24399e-06	2	0	0	1	0	0	2.04422	0.00784961	0.968967
CD163L1	0	0	2.05315e-05	6.30949e-06	2	0	0	1	0	0	2.03575	0.00781733	0.969024
CNTNAP2	0	0	1.50875e-05	5.65702e-06	0	2	0	0	0	0	2.02745	0.00778571	0.96908
LRRC15	0	0	8.04602e-06	1.88978e-06	1	1	0	1	0	0	2.01748	0.00774772	0.969136
INPPL1	0	0	2.53388e-05	5.23001e-06	2	0	0	1	0	0	2.00878	0.00771456	0.969192
ACYP2	0	0	1.3591e-06	6.31136e-07	0	2	0	1	0	0	2.00052	0.00768308	0.969248
TNK2	0	0	2.78176e-05	4.60288e-06	2	0	0	1	0	0	1.99928	0.00767836	0.969303
SNED1	1	0	3.34851e-05	6.45799e-06	0	0	0	3	0	0	1.97036	0.00756813	0.969359
MT1A	0	0	5.01306e-07	2.89054e-07	1	0	0	0	0	0	1.95824	0.00752194	0.969414
MT1H	0	0	6.13906e-07	3.00813e-07	1	0	0	0	0	0	1.95553	0.0075116	0.969469
CKS1B	0	0	9.97424e-07	3.55042e-07	1	0	0	0	0	0	1.94555	0.00747355	0.969524
CXCL11	0	0	6.72575e-07	4.97778e-07	1	0	0	0	0	0	1.94372	0.00746658	0.969579
KCNE1	0	0	1.40212e-06	3.96502e-07	1	0	0	0	0	0	1.93593	0.00743688	0.969633
NDUFB1	0	0	1.36091e-06	4.3031e-07	1	0	0	0	0	0	1.93485	0.00743276	0.969687
CCL5	0	0	1.37822e-06	4.28111e-07	1	0	0	0	0	0	1.93466	0.00743202	0.969741
TRRAP	1	0	8.00506e-05	1.6775e-05	0	0	0	0	0	0	1.93461	0.00743182	0.969795
XCL2	0	0	1.53705e-06	4.90142e-07	1	0	0	0	0	0	1.92843	0.00740828	0.969849
CYFIP1	1	0	3.17646e-05	5.77803e-06	0	0	2	1	0	3	1.92597	0.00739889	0.969902
C12orf60	0	0	1.15151e-06	6.70842e-07	1	0	0	0	0	0	1.92567	0.00739774	0.969955
RNASE13	0	0	1.5914e-06	5.55759e-07	1	0	0	0	0	0	1.92392	0.00739107	0.970008
TMEM252	0	0	1.2766e-06	6.98607e-07	1	0	0	0	0	0	1.92192	0.00738344	0.97006
CISD3	0	0	1.90883e-06	5.01881e-07	1	0	0	0	0	0	1.9211	0.0073803	0.970113
HIST1H2AA	0	0	2.10371e-06	4.58493e-07	1	0	0	0	0	0	1.91992	0.00737582	0.970165
RNF11	0	0	1.61104e-06	6.28052e-07	1	0	0	0	0	0	1.91968	0.00737492	0.970217
CST7	0	0	1.71683e-06	6.30902e-07	1	0	0	0	0	0	1.91763	0.00736708	0.970268
OXLD1	0	0	1.85034e-06	6.0726e-07	1	0	0	0	0	0	1.9165	0.00736277	0.97032
PLA2G2E	0	0	2.07538e-06	5.66444e-07	1	0	0	0	0	0	1.91464	0.0073557	0.970371
C9orf116	0	0	2.24553e-06	5.43466e-07	1	0	0	0	0	0	1.91283	0.00734876	0.970422
HINT3	0	0	1.83793e-06	6.83441e-07	1	0	0	0	0	0	1.91264	0.00734807	0.970473
FTHL17	0	0	2.2006e-06	5.68534e-07	1	0	0	0	0	0	1.91229	0.00734672	0.970523
METTL23	0	0	1.93021e-06	7.53382e-07	1	0	0	0	0	0	1.90726	0.00732755	0.970573
TUSC5	0	0	2.29194e-06	6.43303e-07	1	0	0	0	0	0	1.90667	0.00732528	0.970624
CYTL1	0	0	2.37463e-06	6.22391e-07	1	0	0	0	0	0	1.90631	0.0073239	0.970673
AMTN	0	0	1.45089e-06	9.38704e-07	1	0	0	0	0	0	1.90596	0.00732257	0.970723
MANF	0	0	2.00907e-06	7.57487e-07	1	0	0	0	0	0	1.90564	0.00732134	0.970773
CNIH1	0	0	1.84315e-06	8.21737e-07	1	0	0	0	0	0	1.90518	0.00731959	0.970822
SPATA25	0	0	1.97634e-06	7.93416e-07	1	0	0	0	0	0	1.90431	0.00731628	0.970871
NPM3	0	0	2.1406e-06	7.47177e-07	1	0	0	0	0	0	1.90384	0.00731449	0.97092
NKIRAS1	0	0	2.05711e-06	7.89798e-07	1	0	0	0	0	0	1.90306	0.00731152	0.970968
SH3BGR	0	0	1.75164e-06	9.22657e-07	1	0	0	0	0	0	1.90144	0.00730536	0.971017
OR4C46	0	0	2.12449e-06	8.05728e-07	1	0	0	0	0	0	1.90101	0.00730371	0.971065
OR5B3	0	0	2.05253e-06	8.37736e-07	1	0	0	0	0	0	1.90059	0.00730212	0.971113
POP7	0	0	2.99768e-06	5.41238e-07	1	0	0	0	0	0	1.89953	0.00729807	0.971161
KRTAP10-10	0	0	2.16985e-06	8.21892e-07	1	0	0	0	0	0	1.89935	0.00729736	0.971208
CPLX3	0	0	2.60979e-06	6.74734e-07	1	0	0	0	0	0	1.89934	0.00729732	0.971255
EVI2A	0	0	1.90719e-06	9.11871e-07	1	0	0	0	0	0	1.89925	0.00729698	0.971303
FDX1	0	0	2.67946e-06	6.69493e-07	1	0	0	0	0	0	1.89838	0.00729366	0.97135
CSN1S1	0	0	1.042e-06	1.23519e-06	1	0	0	0	0	0	1.89751	0.00729035	0.971396
UPK2	0	0	2.71951e-06	6.78138e-07	1	0	0	0	0	0	1.89721	0.0072892	0.971443
PGPEP1L	0	0	2.40236e-06	7.97832e-07	1	0	0	0	0	0	1.89649	0.00728648	0.971489
OR5K3	0	0	2.03426e-06	9.28068e-07	1	0	0	0	0	0	1.89613	0.00728509	0.971535
DNHD1	0	1	5.14719e-05	1.92316e-05	0	0	0	7	0	0	1.89588	0.00728412	0.971581
PAEP	0	0	2.67378e-06	7.35679e-07	1	0	0	0	0	0	1.89497	0.00728067	0.971627
MRPL13	0	0	1.79638e-06	1.04437e-06	1	0	0	0	0	0	1.8942	0.00727772	0.971673
FERD3L	0	0	3.24525e-06	5.80272e-07	1	0	0	0	0	0	1.89308	0.00727345	0.971718
MRPS28	0	0	3.00902e-06	6.77471e-07	1	0	0	0	0	0	1.89212	0.00726978	0.971763
PDCL2	0	0	2.2525e-06	9.83416e-07	1	0	0	0	0	0	1.88934	0.00725918	0.971808
PSPH	0	0	2.34771e-06	9.73381e-07	1	0	0	0	0	0	1.88818	0.00725478	0.971853
TMEM229B	0	0	3.57456e-06	5.75343e-07	1	0	0	0	0	0	1.88753	0.00725227	0.971898
ULBP3	0	0	2.58412e-06	9.09311e-07	1	0	0	0	0	0	1.88739	0.00725174	0.971942
FCF1	0	0	1.63441e-06	1.24146e-06	1	0	0	0	0	0	1.88667	0.007249	0.971986
PEBP4	0	0	2.28576e-06	1.04987e-06	1	0	0	0	0	0	1.88525	0.00724359	0.97203
APIP	0	0	2.45458e-06	1.01171e-06	1	0	0	0	0	0	1.88428	0.00723989	0.972074
DKK4	0	0	2.35696e-06	1.05266e-06	1	0	0	0	0	0	1.88385	0.00723824	0.972118
BPIFA1	0	0	2.46014e-06	1.02306e-06	1	0	0	0	0	0	1.88358	0.00723724	0.972162
MS4A6A	0	0	2.36512e-06	1.07276e-06	1	0	0	0	0	0	1.88265	0.00723366	0.972205
MRPL35	0	0	2.54434e-06	1.01508e-06	1	0	0	0	0	0	1.88252	0.00723318	0.972248
CMTM7	0	0	3.50774e-06	6.95897e-07	1	0	0	0	0	0	1.88235	0.00723254	0.972291
C9orf47	0	0	2.90532e-06	9.03559e-07	1	0	0	0	0	0	1.88203	0.0072313	0.972334
SPRYD7	0	0	2.77769e-06	9.5451e-07	1	0	0	0	0	0	1.8816	0.00722965	0.972377
MANSC4	0	0	2.3968e-06	1.08885e-06	1	0	0	0	0	0	1.88124	0.0072283	0.972419
MIS18A	0	0	2.85604e-06	9.40509e-07	1	0	0	0	0	0	1.88095	0.0072272	0.972462
MRPS25	0	0	3.36731e-06	7.94005e-07	1	0	0	0	0	0	1.87966	0.00722228	0.972504
NDUFV2	0	0	2.33421e-06	1.14028e-06	1	0	0	0	0	0	1.87964	0.00722221	0.972546
OR1A2	0	0	3.09801e-06	8.93062e-07	1	0	0	0	0	0	1.87919	0.00722048	0.972587
RAB23	0	0	2.35305e-06	1.16646e-06	1	0	0	0	0	0	1.87794	0.00721571	0.972629
BPIFA3	0	0	2.25502e-06	1.22281e-06	1	0	0	0	0	0	1.87671	0.00721101	0.972671
LGALS3	0	0	3.19714e-06	9.14915e-07	1	0	0	0	0	0	1.87631	0.00720948	0.972712
KCTD6	0	0	3.06138e-06	9.60686e-07	1	0	0	0	0	0	1.87629	0.00720941	0.972753
CEACAM4	0	0	2.5381e-06	1.14091e-06	1	0	0	0	0	0	1.87603	0.00720841	0.972794
YIPF4	0	0	2.81426e-06	1.05154e-06	1	0	0	0	0	0	1.87586	0.00720779	0.972835
OR6F1	0	0	3.40549e-06	8.56614e-07	1	0	0	0	0	0	1.87571	0.0072072	0.972875
OR2V2	0	0	3.5394e-06	8.15456e-07	1	0	0	0	0	0	1.87552	0.00720648	0.972916
GSTM4	0	0	3.00539e-06	9.99968e-07	1	0	0	0	0	0	1.87521	0.00720531	0.972956
TMEM9B	0	0	3.22154e-06	9.28156e-07	1	0	0	0	0	0	1.87519	0.0072052	0.972996
RAB28	0	0	2.46235e-06	1.22399e-06	1	0	0	0	0	0	1.87301	0.0071969	0.973036
GIMAP2	0	0	2.75018e-06	1.13427e-06	1	0	0	0	0	0	1.87266	0.00719556	0.973076
EMC9	0	0	3.41256e-06	9.21133e-07	1	0	0	0	0	0	1.87221	0.00719385	0.973116
RERG	0	0	2.81374e-06	1.12237e-06	1	0	0	0	0	0	1.87217	0.00719369	0.973156
HNRNPA1L2	0	0	3.09046e-06	1.03924e-06	1	0	0	0	0	0	1.87167	0.00719179	0.973195
TMEM176B	0	0	2.63692e-06	1.1924e-06	1	0	0	0	0	0	1.8716	0.00719154	0.973234
METTL6	0	0	2.8856e-06	1.12065e-06	1	0	0	0	0	0	1.871	0.00718923	0.973273
TSSK3	0	0	3.83899e-06	8.3641e-07	1	0	0	0	0	0	1.86919	0.00718233	0.973312
APRT	0	0	3.20283e-06	1.05306e-06	1	0	0	0	0	0	1.86899	0.00718154	0.973351
GJC3	0	0	3.39582e-06	9.89256e-07	1	0	0	0	0	0	1.86895	0.00718139	0.97339
KRTCAP3	0	0	3.77596e-06	8.64285e-07	1	0	0	0	0	0	1.86884	0.00718097	0.973428
CCDC103	0	0	3.17595e-06	1.06649e-06	1	0	0	0	0	0	1.86875	0.00718066	0.973466
LRRC70	0	0	3.34199e-06	2.1961e-06	2	0	0	2	0	0	1.86866	0.00718031	0.973505
CDK5RAP2	0	0	2.36419e-05	8.41763e-06	2	0	0	1	0	0	1.86776	0.00717688	0.973543
OR5A1	0	0	3.32915e-06	1.05275e-06	1	0	0	0	0	0	1.8668	0.0071732	0.97358
FAM60A	0	0	3.51501e-06	9.93524e-07	1	0	0	0	0	0	1.86664	0.00717261	0.973618
NKAIN4	0	0	3.67214e-06	9.4545e-07	1	0	0	0	0	0	1.86641	0.00717173	0.973656
WDR5B	0	0	3.41342e-06	1.03508e-06	1	0	0	0	0	0	1.86625	0.00717111	0.973693
CD3E	0	0	2.92447e-06	1.19993e-06	1	0	0	0	0	0	1.86619	0.00717087	0.973731
PRPS1L1	0	0	3.18172e-06	1.12529e-06	1	0	0	0	0	0	1.86559	0.00716859	0.973768
HDHD3	0	0	3.70104e-06	9.52964e-07	1	0	0	0	0	0	1.86552	0.00716831	0.973805
MRRF	0	0	3.56437e-06	1.00526e-06	1	0	0	0	0	0	1.86517	0.007167	0.973842
MTX2	0	0	2.84877e-06	1.25142e-06	1	0	0	0	0	0	1.86483	0.00716568	0.973878
TMED4	0	0	3.59411e-06	1.01395e-06	1	0	0	0	0	0	1.8642	0.0071633	0.973915
SULT1B1	0	0	2.64171e-06	1.35087e-06	1	0	0	0	0	0	1.86326	0.00715971	0.973951
AKR1B10	0	0	2.82721e-06	1.29091e-06	1	0	0	0	0	0	1.86315	0.00715927	0.973988
NMNAT1	0	0	3.63158e-06	1.02319e-06	1	0	0	0	0	0	1.86307	0.00715898	0.974024
OR51V1	0	0	3.61843e-06	1.0286e-06	1	0	0	0	0	0	1.86302	0.00715878	0.97406
C1QA	0	0	3.58314e-06	1.04434e-06	1	0	0	0	0	0	1.86281	0.007158	0.974096
OR2K2	0	0	4.11944e-06	8.85048e-07	1	0	0	0	0	0	1.86178	0.00715405	0.974132
ATG4C	0	0	3.90509e-06	2.15206e-06	2	0	0	2	0	0	1.86115	0.00715164	0.974167
LRAT	0	0	4.5875e-06	7.59158e-07	1	0	0	0	0	0	1.8602	0.00714804	0.974203
SERPINA12	0	0	3.04777e-06	1.28428e-06	1	0	0	0	0	0	1.85965	0.00714595	0.974238
LAPTM4A	0	0	3.63394e-06	1.10597e-06	1	0	0	0	0	0	1.85873	0.00714241	0.974273
CEACAM21	0	0	3.26529e-06	1.24422e-06	1	0	0	0	0	0	1.85795	0.00713946	0.974309
FGF5	0	0	3.77631e-06	1.07656e-06	1	0	0	0	0	0	1.85779	0.00713882	0.974344
KATNBL1	0	0	2.7572e-06	1.41967e-06	1	0	0	0	0	0	1.85768	0.00713842	0.974379
FITM2	0	0	4.01862e-06	9.98091e-07	1	0	0	0	0	0	1.85766	0.00713832	0.974413
IL20RB	0	0	3.06861e-06	1.32331e-06	1	0	0	0	0	0	1.85727	0.00713684	0.974448
RHOU	0	0	4.22418e-06	9.44063e-07	1	0	0	0	0	0	1.8569	0.00713543	0.974482
GPR15	0	0	3.81127e-06	1.08534e-06	1	0	0	0	0	0	1.85672	0.00713477	0.974517
TTC9C	0	0	3.92421e-06	1.05334e-06	1	0	0	0	0	0	1.85643	0.00713363	0.974551
LRG1	0	0	3.709e-06	1.15534e-06	1	0	0	0	0	0	1.85487	0.00712769	0.974585
PCED1B	0	0	6.6416e-06	1.3784e-06	2	0	0	2	0	0	1.85392	0.00712406	0.974619
C1orf131	0	0	3.87741e-06	1.1222e-06	1	0	0	0	0	0	1.85367	0.00712312	0.974653
C3orf38	0	0	3.1078e-06	1.39086e-06	1	0	0	0	0	0	1.85309	0.00712091	0.974687
LZTFL1	0	0	2.23351e-06	1.68907e-06	1	0	0	0	0	0	1.85283	0.00711992	0.97472
TRUB1	0	0	2.9612e-06	1.4571e-06	1	0	0	0	0	0	1.85221	0.00711753	0.974754
C1QTNF3	0	0	3.19226e-06	1.38038e-06	1	0	0	0	0	0	1.85217	0.0071174	0.974787
RDM1	0	0	3.77263e-06	1.19419e-06	1	0	0	0	0	0	1.85176	0.00711582	0.97482
STX17	0	0	3.1249e-06	1.41571e-06	1	0	0	0	0	0	1.85151	0.00711488	0.974854
CDV3	0	0	4.34993e-06	1.01681e-06	1	0	0	0	0	0	1.85096	0.00711277	0.974887
ABHD14A	0	0	4.00362e-06	1.14413e-06	1	0	0	0	0	0	1.85036	0.00711047	0.97492
FAHD1	0	0	4.81042e-06	8.75692e-07	1	0	0	0	0	0	1.85031	0.0071103	0.974952
CTSO	0	0	3.15926e-06	1.44421e-06	1	0	0	0	0	0	1.84945	0.007107	0.974985
GTPBP8	0	0	3.96585e-06	1.17693e-06	1	0	0	0	0	0	1.84931	0.0071065	0.975018
AIMP1	0	0	3.46394e-06	1.38063e-06	1	0	0	0	0	0	1.84747	0.00709944	0.97505
MMADHC	0	0	3.25957e-06	1.47111e-06	1	0	0	0	0	0	1.84633	0.00709511	0.975082
NSMCE1	0	0	4.21156e-06	1.16986e-06	1	0	0	0	0	0	1.84545	0.00709174	0.975115
ARMCX3	0	0	4.54675e-06	1.07873e-06	1	0	0	0	0	0	1.84438	0.00708765	0.975147
TP53TG5	0	0	3.21349e-06	1.52587e-06	1	0	0	0	0	0	1.8443	0.00708738	0.975179
TACO1	0	0	4.12025e-06	1.23233e-06	1	0	0	0	0	0	1.8438	0.00708546	0.975211
DPH6	0	0	3.349e-06	1.49412e-06	1	0	0	0	0	0	1.8436	0.00708471	0.975242
F3	0	0	3.81666e-06	1.33931e-06	1	0	0	0	0	0	1.84352	0.00708438	0.975274
ZNF843	0	0	3.42442e-06	1.48067e-06	1	0	0	0	0	0	1.843	0.00708239	0.975306
WDR82	0	0	3.78403e-06	1.36352e-06	1	0	0	0	0	0	1.84283	0.00708177	0.975337
AKR1C4	0	0	3.10771e-06	1.59033e-06	1	0	0	0	0	0	1.84281	0.00708169	0.975368
PRDX3	0	0	3.74488e-06	1.37913e-06	1	0	0	0	0	0	1.8427	0.00708128	0.9754
CYB5D2	0	0	5.00187e-06	9.6588e-07	1	0	0	0	0	0	1.84237	0.00708	0.975431
NEUROG1	0	0	5.96956e-06	6.45592e-07	1	0	0	0	0	0	1.84227	0.00707963	0.975462
CHCHD3	0	0	4.15685e-06	1.27071e-06	1	0	0	0	0	0	1.8412	0.00707553	0.975493
GOSR1	0	0	3.76076e-06	1.40983e-06	1	0	0	0	0	0	1.84085	0.00707422	0.975524
PON3	0	0	4.01615e-06	1.32655e-06	1	0	0	0	0	0	1.84074	0.0070738	0.975554
HSD17B3	0	0	3.90057e-06	1.37405e-06	1	0	0	0	0	0	1.84029	0.00707206	0.975585
SDCBP2	0	0	4.68032e-06	1.11405e-06	1	0	0	0	0	0	1.84027	0.00707197	0.975615
NGRN	0	0	4.09604e-06	1.31539e-06	1	0	0	0	0	0	1.83995	0.00707075	0.975646
MNAT1	0	0	3.58372e-06	1.49042e-06	1	0	0	0	0	0	1.83976	0.00707003	0.975676
GPN2	0	0	4.01467e-06	1.34966e-06	1	0	0	0	0	0	1.83958	0.00706937	0.975706
KRBA2	0	0	3.07317e-06	1.6649e-06	1	0	0	0	0	0	1.83958	0.00706935	0.975736
SERPINA3	0	0	4.07944e-06	1.37256e-06	1	0	0	0	0	0	1.8373	0.00706065	0.975766
MYH2	0	0	2.5631e-05	8.3781e-06	2	0	0	1	0	0	1.83678	0.00705868	0.975796
PQLC1	0	0	5.13116e-06	1.04704e-06	1	0	0	0	0	0	1.83599	0.00705565	0.975826
CYB5RL	0	0	4.45213e-06	1.2787e-06	1	0	0	0	0	0	1.83573	0.00705465	0.975855
HSD3B2	0	0	4.19237e-06	1.37469e-06	1	0	0	0	0	0	1.83526	0.00705285	0.975885
DECR1	0	0	4.34313e-06	1.32478e-06	1	0	0	0	0	0	1.83523	0.00705276	0.975914
FKBPL	0	0	3.53372e-06	1.6104e-06	1	0	0	0	0	0	1.83447	0.00704984	0.975944
NDUFAF6	0	0	3.56916e-06	1.60184e-06	1	0	0	0	0	0	1.8343	0.0070492	0.975973
SERPINA10	0	0	4.25657e-06	1.38052e-06	1	0	0	0	0	0	1.83386	0.00704752	0.976002
FN3KRP	0	0	4.62944e-06	1.2586e-06	1	0	0	0	0	0	1.83373	0.00704701	0.976031
FGF4	0	0	5.96264e-06	8.20245e-07	1	0	0	0	0	0	1.83342	0.00704586	0.97606
ELF5	0	0	4.22257e-06	1.41416e-06	1	0	0	0	0	0	1.83272	0.00704318	0.976089
PRSS54	0	0	4.15413e-06	1.44876e-06	1	0	0	0	0	0	1.83212	0.00704089	0.976118
RASD2	0	0	6.16275e-06	7.82013e-07	1	0	0	0	0	0	1.83197	0.00704033	0.976147
ZDHHC12	0	0	5.08338e-06	1.16566e-06	1	0	0	0	0	0	1.83073	0.0070356	0.976175
FGFBP3	0	0	5.8716e-06	9.1363e-07	1	0	0	0	0	0	1.8302	0.00703354	0.976204
ADH1B	0	0	4.61317e-06	1.33337e-06	1	0	0	0	0	0	1.83018	0.00703349	0.976232
TPSG1	0	0	5.2065e-06	1.17025e-06	1	0	0	0	0	0	1.8284	0.0070267	0.976261
ZNF587B	0	0	4.39758e-06	1.44321e-06	1	0	0	0	0	0	1.82825	0.00702612	0.976289
TGDS	0	0	3.91547e-06	1.60501e-06	1	0	0	0	0	0	1.82822	0.007026	0.976317
B3GNT5	0	0	4.78361e-06	1.31575e-06	1	0	0	0	0	0	1.82818	0.00702584	0.976345
PLEK	0	0	4.01452e-06	1.58126e-06	1	0	0	0	0	0	1.82774	0.00702417	0.976373
WDR31	0	0	3.95053e-06	1.6222e-06	1	0	0	0	0	0	1.82674	0.00702037	0.976401
SNX11	0	0	4.16298e-06	1.56046e-06	1	0	0	0	0	0	1.82627	0.00701856	0.976429
PEF1	0	0	5.45043e-06	1.1311e-06	1	0	0	0	0	0	1.82625	0.0070185	0.976456
SLC25A18	0	0	4.79103e-06	1.37055e-06	1	0	0	0	0	0	1.82526	0.0070147	0.976484
CPSF4	0	0	5.09157e-06	1.2706e-06	1	0	0	0	0	0	1.82524	0.00701464	0.976511
AKR1A1	0	0	4.63065e-06	1.44021e-06	1	0	0	0	0	0	1.82444	0.00701157	0.976539
ZNF620	0	0	3.13781e-06	1.94007e-06	1	0	0	0	0	0	1.82442	0.0070115	0.976566
C17orf97	0	0	5.3771e-06	1.20074e-06	1	0	0	0	0	0	1.82395	0.00700971	0.976593
PGLYRP4	0	0	4.41768e-06	1.52485e-06	1	0	0	0	0	0	1.82375	0.00700895	0.97662
PLEKHG7	0	0	3.13855e-06	1.96137e-06	1	0	0	0	0	0	1.82332	0.00700732	0.976648
ING4	0	0	5.4257e-06	1.21069e-06	1	0	0	0	0	0	1.82262	0.00700463	0.976675
GPR35	0	0	5.78862e-06	1.09524e-06	1	0	0	0	0	0	1.82234	0.00700358	0.976701
IMPA2	0	0	4.9571e-06	1.37329e-06	1	0	0	0	0	0	1.8223	0.0070034	0.976728
CD244	0	0	3.86147e-06	1.74392e-06	1	0	0	0	0	0	1.82207	0.00700253	0.976755
KRT8	0	0	3.18656e-06	1.97841e-06	1	0	0	0	0	0	1.82164	0.0070009	0.976782
SLC25A16	0	0	4.01254e-06	1.70289e-06	1	0	0	0	0	0	1.82159	0.00700069	0.976808
FAM173A	0	0	6.01324e-06	1.05956e-06	1	0	0	0	0	0	1.82036	0.00699599	0.976835
PROX2	0	0	3.77063e-06	1.82735e-06	1	0	0	0	0	0	1.81938	0.00699226	0.976861
F11R	0	0	4.75643e-06	1.52032e-06	1	0	0	0	0	0	1.81823	0.00698789	0.976887
C3AR1	0	0	4.62537e-06	1.56424e-06	1	0	0	0	0	0	1.81823	0.00698786	0.976913
BOLL	0	0	4.76257e-06	1.52359e-06	1	0	0	0	0	0	1.81796	0.00698686	0.97694
UPP1	0	0	6.00165e-06	1.11211e-06	1	0	0	0	0	0	1.81788	0.00698656	0.976966
SDS	0	0	5.65558e-06	1.24235e-06	1	0	0	0	0	0	1.81712	0.00698365	0.976992
HOGA1	0	0	5.28743e-06	1.38898e-06	1	0	0	0	0	0	1.81591	0.00697902	0.977018
PTGFR	0	0	5.03485e-06	1.52854e-06	1	0	0	0	0	0	1.81311	0.00696834	0.977043
TOR1AIP2	0	0	3.80876e-06	1.94768e-06	1	0	0	0	0	0	1.81264	0.00696655	0.977069
RNF113B	0	0	6.58932e-06	1.02303e-06	1	0	0	0	0	0	1.81249	0.00696599	0.977095
KRT40	0	0	4.3282e-06	1.79604e-06	1	0	0	0	0	0	1.81152	0.00696228	0.97712
MR1	0	0	4.81694e-06	1.63364e-06	1	0	0	0	0	0	1.81147	0.0069621	0.977146
UBQLN3	0	0	3.76244e-06	1.99002e-06	1	0	0	0	0	0	1.81129	0.00696138	0.977171
RBM48	0	0	5.14206e-06	1.54746e-06	1	0	0	0	0	0	1.81035	0.00695779	0.977197
MMP3	0	0	4.37438e-06	1.81652e-06	1	0	0	0	0	0	1.80971	0.00695536	0.977222
C21orf33	0	0	5.8701e-06	1.31883e-06	1	0	0	0	0	0	1.80964	0.00695508	0.977247
ANGPTL3	0	0	3.97003e-06	1.95473e-06	1	0	0	0	0	0	1.80956	0.00695479	0.977272
ANKRD23	0	0	5.3283e-06	1.50125e-06	1	0	0	0	0	0	1.80954	0.00695473	0.977297
STRADB	0	0	4.28473e-06	1.86517e-06	1	0	0	0	0	0	1.80877	0.00695176	0.977322
ZNF529	0	0	3.83087e-06	2.02475e-06	1	0	0	0	0	0	1.80838	0.00695028	0.977347
ZNF506	0	0	5.31638e-06	1.53141e-06	1	0	0	0	0	0	1.80822	0.00694968	0.977372
ZNF561	0	0	4.53749e-06	1.80384e-06	1	0	0	0	0	0	1.8076	0.0069473	0.977397
AKR1D1	0	0	5.25707e-06	1.57124e-06	1	0	0	0	0	0	1.80721	0.00694583	0.977421
ABHD11	0	0	5.30832e-06	1.56266e-06	1	0	0	0	0	0	1.80678	0.00694419	0.977446
METTL1	0	0	5.20066e-06	1.60248e-06	1	0	0	0	0	0	1.80659	0.00694344	0.97747
PIGW	0	0	4.48336e-06	1.85207e-06	1	0	0	0	0	0	1.80608	0.00694151	0.977495
DRAXIN	0	0	5.69371e-06	1.45941e-06	1	0	0	0	0	0	1.80551	0.00693933	0.977519
ZNF141	0	0	5.15872e-06	1.64306e-06	1	0	0	0	0	0	1.80525	0.00693833	0.977543
ALLC	0	0	4.88292e-06	1.73543e-06	1	0	0	0	0	0	1.80523	0.00693827	0.977568
NAP1L4	0	0	4.23086e-06	2.01983e-06	1	0	0	0	0	0	1.80189	0.00692552	0.977592
RASD1	0	0	7.39293e-06	9.74226e-07	1	0	0	0	0	0	1.80149	0.006924	0.977616
GCNT3	0	0	5.48611e-06	1.61787e-06	1	0	0	0	0	0	1.80102	0.0069222	0.97764
RPUSD3	0	0	5.24443e-06	1.70115e-06	1	0	0	0	0	0	1.80089	0.00692169	0.977664
LRRC42	0	0	4.66585e-06	1.90027e-06	1	0	0	0	0	0	1.80059	0.00692056	0.977688
BCAT1	0	0	4.79041e-06	1.86363e-06	1	0	0	0	0	0	1.80034	0.00691961	0.977712
PGAP3	0	0	6.39635e-06	1.3322e-06	1	0	0	0	0	0	1.80014	0.00691884	0.977735
AGMO	0	0	3.72769e-06	2.05182e-06	1	1	3	1	1	2	1.79977	0.00691743	0.977759
LANCL1	0	0	5.18364e-06	1.77386e-06	1	0	0	0	0	0	1.79826	0.00691165	0.977782
HMCES	0	0	5.54668e-06	1.65489e-06	1	0	0	0	0	0	1.79815	0.00691124	0.977806
CLMP	0	0	4.73106e-06	1.93198e-06	1	0	0	0	0	0	1.79791	0.00691032	0.977829
TM6SF1	0	0	5.48268e-06	1.68569e-06	1	0	0	0	0	0	1.79768	0.00690943	0.977853
GPR22	0	0	4.71576e-06	1.95035e-06	1	0	0	0	0	0	1.79724	0.00690778	0.977876
PRRX2	0	0	8.15295e-06	8.12605e-07	1	0	0	0	0	0	1.79695	0.00690667	0.977899
ALS2CR12	0	0	4.0926e-06	2.16761e-06	1	0	0	0	0	0	1.7968	0.0069061	0.977922
DMRTC2	0	0	6.1262e-06	1.50252e-06	1	0	0	0	0	0	1.79611	0.00690345	0.977946
PDHA2	0	0	6.56115e-06	1.37793e-06	1	0	0	0	0	0	1.7951	0.00689959	0.977969
CCNA1	0	0	3.88669e-06	2.27436e-06	1	0	0	0	0	0	1.79491	0.00689888	0.977992
SYT8	0	0	6.02052e-06	1.57793e-06	1	0	0	0	0	0	1.79409	0.00689576	0.978014
SKAP1	0	0	4.67325e-06	2.03015e-06	1	0	0	0	0	0	1.79396	0.00689526	0.978037
RFC4	0	0	4.62294e-06	2.04827e-06	1	0	0	0	0	0	1.7939	0.00689501	0.97806
C1orf198	0	0	6.52808e-06	1.413e-06	1	0	0	0	0	0	1.79389	0.00689499	0.978083
ZFP69B	0	0	5.3225e-06	1.8177e-06	1	0	0	0	0	0	1.79374	0.00689442	0.978105
TES	0	0	5.54718e-06	1.762e-06	1	0	0	0	0	0	1.79278	0.00689074	0.978128
NXPE2	0	0	4.89638e-06	1.98317e-06	1	0	0	0	0	0	1.79258	0.00688999	0.97815
HAUS3	0	0	4.09234e-06	2.2594e-06	1	0	0	0	0	0	1.79222	0.0068886	0.978173
SCG3	0	0	5.18927e-06	1.89799e-06	1	0	0	0	0	0	1.79195	0.00688758	0.978195
FAM47E	0	0	5.54707e-06	1.78077e-06	1	0	0	0	0	0	1.79184	0.00688717	0.978218
SIGLEC9	0	0	4.79788e-06	2.0319e-06	1	0	0	0	0	0	1.79179	0.00688698	0.97824
ZNF70	0	0	5.80074e-06	1.70442e-06	1	0	0	0	0	0	1.79143	0.0068856	0.978262
CYP39A1	0	0	4.72115e-06	2.07694e-06	1	0	0	0	0	0	1.79083	0.00688329	0.978284
VRK1	0	0	5.18504e-06	1.94384e-06	1	0	0	0	0	0	1.78973	0.00687912	0.978306
RNF14	0	0	5.15237e-06	1.95834e-06	1	0	0	0	0	0	1.78955	0.00687843	0.978328
SYNE4	0	0	5.14915e-06	1.96006e-06	1	0	0	0	0	0	1.78952	0.00687831	0.97835
CCR10	0	0	7.17998e-06	1.30192e-06	1	0	0	0	0	0	1.78861	0.00687484	0.978372
ZNF732	0	0	5.2518e-06	1.97189e-06	1	0	0	0	0	0	1.78723	0.00686954	0.978394
SIRT3	0	0	6.83488e-06	1.45425e-06	1	0	0	0	0	0	1.78674	0.00686768	0.978415
FOXD4L1	0	0	7.22079e-06	1.35449e-06	1	0	0	0	0	0	1.78532	0.00686226	0.978437
SLC9B1	0	0	5.11834e-06	2.05762e-06	1	0	0	0	0	0	1.78518	0.00686172	0.978459
STAMBP	0	0	4.92855e-06	2.15327e-06	1	0	0	0	0	0	1.78357	0.0068556	0.97848
KCNJ16	0	0	6.21187e-06	1.72595e-06	1	0	0	0	0	0	1.78353	0.00685544	0.978502
CCKAR	0	0	7.37691e-06	1.3552e-06	1	0	0	0	0	0	1.7827	0.00685227	0.978523
PUSL1	0	0	7.5151e-06	1.31471e-06	1	0	0	0	0	0	1.78243	0.00685125	0.978545
MB21D1	0	0	6.05987e-06	1.79922e-06	1	0	0	0	0	0	1.78241	0.00685115	0.978566
TMEM184A	0	0	6.41442e-06	1.6849e-06	1	0	0	0	0	0	1.78222	0.00685043	0.978587
ADAM21	0	0	4.86742e-06	2.20346e-06	1	0	0	0	0	0	1.7821	0.00684996	0.978608
COX15	0	0	5.06737e-06	2.14399e-06	1	0	0	0	0	0	1.78173	0.00684857	0.978629
ZSCAN5A	0	0	5.92931e-06	1.85825e-06	1	0	0	0	0	0	1.78164	0.00684821	0.978651
GPBP1L1	0	0	5.26676e-06	2.09527e-06	1	0	0	0	0	0	1.78084	0.00684518	0.978672
RFNG	0	0	7.96358e-06	1.2054e-06	1	0	0	0	0	0	1.78047	0.00684376	0.978693
ACTL6A	0	0	5.68802e-06	1.96617e-06	1	0	0	0	0	0	1.78027	0.006843	0.978713
DNAJB14	0	0	5.38992e-06	2.06932e-06	1	0	0	0	0	0	1.78009	0.00684231	0.978734
OSCP1	0	0	5.50596e-06	2.0328e-06	1	0	0	0	0	0	1.77998	0.00684189	0.978755
CDK15	0	0	5.53326e-06	2.04752e-06	1	0	0	0	0	0	1.7788	0.00683738	0.978776
SAAL1	0	0	5.56087e-06	2.05443e-06	1	0	0	0	0	0	1.778	0.00683433	0.978796
CIAO1	0	0	7.2065e-06	1.51042e-06	1	0	0	0	0	0	1.7778	0.00683357	0.978817
TMEM130	0	0	6.7418e-06	1.66682e-06	1	0	0	0	0	0	1.77771	0.00683322	0.978838
KATNAL2	0	0	5.46238e-06	2.11015e-06	1	0	0	0	0	0	1.77687	0.00683001	0.978858
FAM227B	0	0	4.22328e-06	2.5284e-06	1	0	0	0	0	0	1.77667	0.00682927	0.978879
ZNF578	0	0	6.03523e-06	1.92595e-06	1	0	0	0	0	0	1.77653	0.00682871	0.978899
SLC39A13	0	0	7.32496e-06	1.49725e-06	1	0	0	0	0	0	1.77651	0.00682862	0.978919
UGP2	0	0	6.42247e-06	1.81057e-06	1	0	0	0	0	0	1.77585	0.00682613	0.97894
PELI1	0	0	7.03499e-06	1.60801e-06	1	0	0	0	0	0	1.77579	0.0068259	0.97896
GXYLT1	0	0	5.35461e-06	2.17348e-06	1	0	0	0	0	0	1.77552	0.00682484	0.97898
ZNF527	0	0	5.0752e-06	2.27391e-06	1	0	0	0	0	0	1.77517	0.0068235	0.979
BFAR	0	0	5.93425e-06	1.99576e-06	1	0	0	0	0	0	1.77474	0.00682188	0.97902
MS4A14	0	0	3.97908e-06	2.68469e-06	1	0	0	0	0	0	1.773	0.00681522	0.97904
GPR142	0	0	6.70026e-06	1.78191e-06	1	0	0	0	0	0	1.7727	0.00681408	0.97906
SLC24A5	0	0	6.47591e-06	1.85717e-06	1	0	0	0	0	0	1.77267	0.00681397	0.97908
IL11RA	0	0	5.92622e-06	2.07547e-06	1	0	0	0	0	0	1.77093	0.00680735	0.9791
KLRG2	0	0	7.36257e-06	1.62208e-06	1	0	0	0	0	0	1.76971	0.00680269	0.97912
DXO	0	0	7.10801e-06	1.71073e-06	1	0	0	0	0	0	1.76952	0.00680193	0.979139
DEPTOR	0	0	7.36879e-06	1.65131e-06	1	0	0	0	0	0	1.76817	0.0067968	0.979159
TRIM22	0	0	6.19094e-06	2.06274e-06	1	0	0	0	0	0	1.76721	0.00679314	0.979179
AAMP	0	0	7.00239e-06	1.81063e-06	1	0	0	0	0	0	1.76632	0.00678974	0.979198
ETV3	0	0	6.90204e-06	1.84811e-06	1	0	0	0	0	0	1.76612	0.00678897	0.979218
P2RX6	0	0	6.76277e-06	1.91618e-06	1	0	0	0	0	0	1.76505	0.00678489	0.979237
CYP4Z1	0	0	6.46144e-06	2.01941e-06	1	0	0	0	0	0	1.76491	0.00678435	0.979257
FAR1	0	0	5.51443e-06	2.33615e-06	1	0	0	0	0	0	1.76486	0.00678418	0.979276
CPVL	0	0	6.13576e-06	2.15422e-06	1	0	0	0	0	0	1.76362	0.00677941	0.979296
STK38L	0	0	6.36462e-06	2.08106e-06	1	0	0	0	0	0	1.76346	0.00677883	0.979315
GBP7	0	0	5.00038e-06	2.53721e-06	1	0	0	0	0	0	1.76343	0.00677869	0.979334
STEAP4	0	0	6.32382e-06	2.10678e-06	1	0	0	0	0	0	1.76287	0.00677655	0.979353
TC2N	0	0	5.65025e-06	2.33713e-06	1	0	0	0	0	0	1.76259	0.00677549	0.979372
GAB4	0	0	6.46578e-06	2.0657e-06	1	0	0	0	0	0	1.76256	0.00677539	0.979391
CANT1	0	0	8.43617e-06	1.41679e-06	1	0	0	0	0	0	1.76228	0.00677431	0.979411
SCML4	0	0	7.24038e-06	1.81567e-06	1	0	0	0	0	0	1.76218	0.00677394	0.979429
TNFRSF1B	0	0	7.09784e-06	1.87105e-06	1	0	0	0	0	0	1.76179	0.00677244	0.979448
C11orf49	0	0	6.70081e-06	2.00429e-06	1	0	0	0	0	0	1.76174	0.00677223	0.979467
RASSF2	0	0	7.32992e-06	1.81326e-06	1	0	0	0	0	0	1.76084	0.00676881	0.979486
CTAGE1	0	0	5.3348e-06	2.47869e-06	1	0	0	0	0	0	1.76081	0.00676871	0.979505
GRSF1	0	0	6.06241e-06	2.23682e-06	1	0	0	0	0	0	1.76076	0.00676852	0.979524
RGMB	0	0	7.75016e-06	1.68051e-06	1	0	0	0	0	0	1.7605	0.00676752	0.979542
KPRP	0	0	5.85966e-06	2.31046e-06	1	0	0	0	0	0	1.76047	0.0067674	0.979561
SLC16A5	0	0	7.53772e-06	1.7534e-06	1	0	0	0	0	0	1.76039	0.00676709	0.979579
BSPRY	0	0	8.03348e-06	1.61462e-06	1	0	0	0	0	0	1.75912	0.00676225	0.979598
ADHFE1	0	0	6.39437e-06	2.16452e-06	1	0	0	0	0	0	1.75888	0.00676134	0.979617
FAH	0	0	7.08754e-06	1.9523e-06	1	0	0	0	0	0	1.75797	0.00675787	0.979635
CYP1A2	0	0	7.87844e-06	1.69934e-06	1	0	0	0	0	0	1.75749	0.00675602	0.979653
RARB	0	0	5.88266e-06	2.37155e-06	1	0	0	0	0	0	1.7571	0.00675453	0.979672
CARD8	0	0	6.52829e-06	2.16003e-06	1	0	0	0	0	0	1.75692	0.00675383	0.97969
SIRT2	0	0	7.0896e-06	1.97863e-06	1	0	0	0	0	0	1.75665	0.00675281	0.979708
CEACAM1	0	0	6.31884e-06	2.24531e-06	1	0	0	0	0	0	1.75616	0.00675094	0.979726
DNAJC3	0	0	5.51467e-06	2.5139e-06	1	0	0	0	0	0	1.75615	0.0067509	0.979745
ATAD3C	0	0	7.70194e-06	1.85479e-06	1	0	0	0	0	0	1.75275	0.00673793	0.979763
KRT72	0	0	7.62504e-06	1.88512e-06	1	0	0	0	0	0	1.75252	0.00673704	0.979781
SLC22A15	0	0	6.26038e-06	2.34058e-06	1	0	0	0	0	0	1.75246	0.00673681	0.979799
KMO	0	0	6.159e-06	2.40123e-06	1	0	0	0	0	0	1.75115	0.00673181	0.979817
METTL25	0	0	5.55127e-06	2.61136e-06	1	0	0	0	0	0	1.75079	0.00673046	0.979835
MAEL	0	0	6.00454e-06	2.4638e-06	1	0	0	0	0	0	1.75061	0.00672975	0.979853
SURF6	0	0	8.6429e-06	1.5954e-06	1	0	0	0	0	0	1.75017	0.00672808	0.97987
TYR	0	0	7.29772e-06	2.0563e-06	1	0	0	0	0	0	1.74947	0.00672541	0.979888
FNDC1	0	0	3.24298e-05	7.56476e-06	1	0	3	0	0	2	1.74902	0.00672368	0.979906
CYTH3	0	0	7.61517e-06	1.98237e-06	1	0	0	0	0	0	1.74793	0.00671954	0.979924
SLC43A3	0	0	6.78059e-06	2.26964e-06	1	0	0	0	0	0	1.74747	0.00671775	0.979941
PIP5KL1	0	0	7.92498e-06	1.89148e-06	1	0	0	0	0	0	1.74735	0.0067173	0.979959
TBXAS1	0	0	9.67697e-06	2.51316e-06	2	0	0	2	0	0	1.74647	0.00671396	0.979977
ZNF471	0	0	7.08391e-06	2.19545e-06	1	0	0	0	0	0	1.74616	0.00671277	0.979994
TNNT1	0	0	9.33387e-06	1.46113e-06	1	0	0	0	0	0	1.74557	0.00671049	0.980012
OSGIN2	0	0	6.41364e-06	2.46173e-06	1	0	0	0	0	0	1.74407	0.00670479	0.980029
CDK10	0	0	7.71808e-06	2.03861e-06	1	0	0	0	0	0	1.74354	0.00670274	0.980046
DNTT	0	0	6.80486e-06	2.34659e-06	1	0	0	0	0	0	1.74333	0.00670196	0.980064
FANCC	0	0	5.31588e-06	2.85937e-06	1	0	0	0	0	0	1.74256	0.00669903	0.980081
FBXO3	0	0	6.11221e-06	2.63382e-06	1	0	0	0	0	0	1.7406	0.00669154	0.980098
ATP12A	0	0	1.77345e-05	4.18197e-06	1	0	1	1	0	0	1.74041	0.00669081	0.980116
UTP14C	0	0	6.05382e-06	2.66556e-06	1	0	0	0	0	0	1.74001	0.00668927	0.980133
TCTE1	0	0	8.55427e-06	1.83405e-06	1	0	0	0	0	0	1.73999	0.00668921	0.98015
FAM83E	0	0	8.27421e-06	1.9655e-06	1	0	0	0	0	0	1.73812	0.00668207	0.980167
CETP	0	0	6.73003e-06	2.48214e-06	1	0	0	0	0	0	1.73797	0.00668149	0.980184
SLC22A4	0	0	7.57254e-06	2.2111e-06	1	0	0	0	0	0	1.73752	0.00667976	0.980201
ACPT	0	0	8.68433e-06	1.84206e-06	1	0	0	0	0	0	1.73751	0.00667974	0.980218
FAM198A	0	0	7.63394e-06	2.19408e-06	1	0	0	0	0	0	1.73735	0.00667913	0.980235
ALDH9A1	0	0	7.539e-06	2.23566e-06	1	0	0	0	0	0	1.73687	0.00667728	0.980252
YES1	0	0	5.89014e-06	2.78631e-06	1	0	0	0	0	0	1.73681	0.00667706	0.980269
SPATA2	0	0	8.87148e-06	1.81153e-06	1	0	0	0	0	0	1.73599	0.00667392	0.980286
ENOSF1	0	0	7.23082e-06	2.36193e-06	1	0	0	0	0	0	1.73572	0.00667289	0.980303
ZNF569	0	0	7.22658e-06	2.36907e-06	1	0	0	0	0	0	1.73544	0.00667184	0.980319
EIF2A	0	0	6.56668e-06	2.5992e-06	1	0	0	0	0	0	1.73495	0.00666993	0.980336
PCED1A	0	0	9.25144e-06	1.7086e-06	1	0	0	0	0	0	1.73488	0.00666968	0.980353
ZNF17	0	0	7.89967e-06	2.16355e-06	1	0	0	0	0	0	1.73456	0.00666846	0.980369
MAP2K5	0	0	6.28382e-06	2.7059e-06	1	0	0	0	0	0	1.73435	0.00666766	0.980386
NMD3	0	0	6.73376e-06	2.55652e-06	1	0	0	0	0	0	1.73432	0.00666753	0.980402
NRROS	0	0	8.12456e-06	2.09684e-06	1	0	0	0	0	0	1.73417	0.00666698	0.980419
CCNK	0	0	6.87678e-06	2.53923e-06	1	0	0	0	0	0	1.73285	0.00666194	0.980435
CYP2A7	0	0	8.67981e-06	1.96972e-06	1	0	0	0	0	0	1.73141	0.00665645	0.980452
CERK	0	0	7.13747e-06	2.51597e-06	1	0	0	0	0	0	1.72979	0.00665024	0.980468
IPPK	0	0	7.83019e-06	2.28734e-06	1	0	0	0	0	0	1.7297	0.0066499	0.980485
ZNF267	0	0	5.95946e-06	2.92796e-06	1	0	0	0	0	0	1.72887	0.00664672	0.980501
NARFL	0	0	7.77729e-06	2.33248e-06	1	0	0	0	0	0	1.72837	0.00664484	0.980517
WDR25	0	0	8.52189e-06	2.11936e-06	1	0	0	0	0	0	1.72673	0.00663856	0.980533
DAPK3	0	0	9.81184e-06	1.74527e-06	1	0	0	0	0	0	1.72417	0.00662878	0.98055
COCH	0	0	8.01061e-06	2.34251e-06	1	0	0	0	0	0	1.72416	0.00662876	0.980566
THEMIS	0	0	8.01799e-06	2.34673e-06	1	0	0	0	0	0	1.72384	0.00662754	0.980582
SETD6	0	0	9.01579e-06	2.017e-06	1	0	0	0	0	0	1.72378	0.00662728	0.980598
LFNG	0	0	9.35241e-06	1.91599e-06	1	0	0	0	0	0	1.72327	0.00662536	0.980614
CSRNP1	0	0	8.96512e-06	2.07777e-06	1	0	0	0	0	0	1.72167	0.00661922	0.98063
CTTNBP2NL	0	0	8.33896e-06	2.30535e-06	1	0	0	0	0	0	1.72071	0.00661559	0.980646
SLC47A1	0	0	7.65559e-06	2.54125e-06	1	0	0	0	0	0	1.72029	0.00661398	0.980662
FASTKD2	0	0	6.9661e-06	2.78411e-06	1	0	0	0	0	0	1.71966	0.00661155	0.980678
GPD2	0	0	6.39271e-06	2.97628e-06	1	0	0	0	0	0	1.71961	0.00661138	0.980694
SPINT1	0	0	9.29726e-06	2.03001e-06	1	0	0	0	0	0	1.71868	0.00660782	0.98071
CD93	0	0	8.29806e-06	2.37848e-06	1	0	0	0	0	0	1.71786	0.0066047	0.980725
CEP68	0	0	8.25778e-06	2.41188e-06	1	0	0	0	0	0	1.71691	0.00660104	0.980741
CYP27B1	0	0	8.47845e-06	2.34193e-06	1	0	0	0	0	0	1.71675	0.00660043	0.980757
LCA5	0	0	6.37698e-06	3.04217e-06	1	0	0	0	0	0	1.71672	0.00660031	0.980773
ZYG11A	0	0	5.49021e-06	3.3519e-06	1	0	0	0	0	0	1.71608	0.00659788	0.980788
SLITRK1	0	0	7.27529e-06	2.79405e-06	1	0	0	0	0	0	1.71426	0.00659094	0.980804
CORO2A	0	0	8.31648e-06	2.45859e-06	1	0	0	0	0	0	1.71374	0.00658896	0.980819
CRISPLD1	0	0	7.48302e-06	2.79909e-06	1	0	0	0	0	0	1.71073	0.00657744	0.980835
APBB3	0	0	9.04261e-06	2.28428e-06	1	0	0	0	0	0	1.71057	0.00657682	0.980851
PPP2R5B	0	0	9.61506e-06	2.09671e-06	1	0	0	0	0	0	1.71047	0.00657644	0.980866
CHST5	0	0	1.12356e-05	1.58113e-06	1	0	0	0	0	0	1.70952	0.00657284	0.980881
ZNF555	0	0	7.3262e-06	2.87968e-06	1	0	0	0	0	0	1.70938	0.00657228	0.980897
SLC34A3	0	0	9.35224e-06	2.22242e-06	1	0	0	0	0	0	1.70862	0.00656941	0.980912
ADRA1A	0	0	1.03476e-05	1.90982e-06	1	0	0	0	0	0	1.70783	0.00656636	0.980928
PPM1J	0	0	8.84162e-06	2.41575e-06	1	0	0	0	0	0	1.70748	0.00656504	0.980943
CRELD1	0	0	8.25748e-06	2.61986e-06	1	0	0	0	0	0	1.707	0.0065632	0.980958
NOX3	0	0	8.15982e-06	2.66057e-06	1	0	0	0	0	0	1.70661	0.0065617	0.980973
FLAD1	0	0	8.39872e-06	2.58595e-06	1	0	0	0	0	0	1.70638	0.00656084	0.980989
UGT1A4	0	0	1.04768e-05	1.93356e-06	1	0	0	0	0	0	1.70467	0.0065543	0.981004
LILRB2	0	0	7.97889e-06	2.78e-06	1	0	0	0	0	0	1.70379	0.00655096	0.981019
GTSE1	0	0	8.56905e-06	2.59025e-06	1	0	0	0	0	0	1.70349	0.00654981	0.981034
MMP19	0	0	8.59663e-06	2.58421e-06	1	0	0	0	0	0	1.70334	0.00654924	0.981049
SMOC2	0	0	1.02486e-05	2.067e-06	1	0	0	0	0	0	1.70192	0.00654378	0.981064
CATSPER1	0	0	8.01352e-06	2.81142e-06	1	0	0	0	0	0	1.70176	0.00654319	0.981079
SENP5	0	0	7.8111e-06	2.92057e-06	1	0	0	0	0	0	1.69978	0.00653564	0.981094
GPR135	0	0	1.20588e-05	1.51912e-06	1	0	0	0	0	0	1.69958	0.00653487	0.981109
ARHGAP18	0	0	6.85499e-06	3.267e-06	1	0	0	0	0	0	1.69847	0.00653061	0.981124
GEN1	0	0	5.75533e-06	3.63514e-06	1	0	0	0	0	0	1.69844	0.00653049	0.981139
FAAH	0	0	8.65885e-06	2.67091e-06	1	0	0	0	0	0	1.69826	0.00652983	0.981154
TEAD2	0	0	9.71669e-06	2.3342e-06	1	0	0	0	0	0	1.6976	0.00652729	0.981168
MYNN	0	0	9.83842e-06	2.32296e-06	1	0	0	0	0	0	1.69622	0.00652204	0.981183
NDRG4	0	0	9.56438e-06	2.4192e-06	1	0	0	0	0	0	1.69596	0.00652105	0.981198
SLC24A2	0	0	9.05852e-06	2.61145e-06	1	0	0	0	0	0	1.69481	0.00651663	0.981213
MYLK3	0	0	7.63434e-06	3.09879e-06	1	0	0	0	0	0	1.69415	0.00651412	0.981227
EZR	0	0	9.23099e-06	2.59182e-06	1	0	0	0	0	0	1.69303	0.00650986	0.981242
WDR43	0	0	7.52427e-06	3.21421e-06	1	0	0	0	0	0	1.69044	0.00649996	0.981257
FUT11	0	0	1.16977e-05	1.83638e-06	1	0	0	0	0	0	1.69021	0.00649905	0.981271
NOS1AP	0	0	1.05487e-05	2.22605e-06	1	0	0	0	0	0	1.68971	0.00649717	0.981286
SLC3A1	0	0	9.45551e-06	2.58962e-06	1	0	0	0	0	0	1.68963	0.00649687	0.9813
SLC1A5	0	0	1.16264e-05	1.88411e-06	1	0	0	0	0	0	1.68907	0.0064947	0.981315
CCNT1	0	0	8.58108e-06	2.90299e-06	1	0	0	0	0	0	1.68855	0.00649271	0.981329
RIC8A	0	0	1.10683e-05	2.12941e-06	1	0	0	0	0	0	1.68619	0.0064837	0.981344
GRK4	0	0	9.39131e-06	2.68445e-06	1	0	0	0	0	0	1.68618	0.00648367	0.981358
FBXO30	0	0	8.96087e-06	2.8446e-06	1	0	0	0	0	0	1.68537	0.00648056	0.981373
LRRC8B	0	0	9.54808e-06	2.67737e-06	1	0	0	0	0	0	1.68407	0.00647563	0.981387
RASGRP3	0	0	8.4276e-06	3.07485e-06	1	0	0	0	0	0	1.68288	0.00647107	0.981401
CRISPLD2	0	0	1.05088e-05	2.39071e-06	1	0	0	0	0	0	1.6826	0.00647	0.981416
VWA5A	0	0	8.09694e-06	3.20881e-06	1	0	0	0	0	0	1.68176	0.00646678	0.98143
EGR4	0	0	1.18997e-05	1.9539e-06	1	0	0	0	0	0	1.68156	0.00646602	0.981444
SAMHD1	0	0	7.17536e-06	3.5233e-06	1	0	0	0	0	0	1.68141	0.00646546	0.981458
ALAS1	0	0	9.7731e-06	2.6659e-06	1	0	0	0	0	0	1.68112	0.00646434	0.981472
ZNF235	0	0	9.52743e-06	2.76805e-06	1	0	0	0	0	0	1.68015	0.00646064	0.981486
ZNF268	0	0	7.31105e-06	3.51435e-06	1	0	0	0	0	0	1.67972	0.00645898	0.981501
ANKK1	0	0	1.00322e-05	2.64377e-06	1	0	0	0	0	0	1.67814	0.00645296	0.981515
LRRC43	0	0	1.01547e-05	2.62402e-06	1	0	0	0	0	0	1.67717	0.00644925	0.981529
ADAM10	0	0	7.6643e-06	3.45231e-06	1	0	0	0	0	0	1.67712	0.00644905	0.981543
TMCO3	0	0	9.703e-06	2.79641e-06	1	0	0	0	0	0	1.67611	0.00644519	0.981557
PNPLA8	0	0	8.23469e-06	3.29323e-06	1	0	0	0	0	0	1.67568	0.00644356	0.981571
PRKG2	0	0	7.39417e-06	3.59381e-06	1	0	0	0	0	0	1.67472	0.0064399	0.981585
MARCH7	0	0	8.82405e-06	3.12664e-06	1	0	0	0	0	0	1.67431	0.00643833	0.981598
RRN3	0	0	9.24598e-06	2.99931e-06	1	0	0	0	0	0	1.67372	0.00643606	0.981612
CHRNB2	0	0	1.26236e-05	1.89452e-06	1	0	0	0	0	0	1.67319	0.00643405	0.981626
EPS8	0	0	6.92475e-06	3.85659e-06	1	0	0	0	0	0	1.6698	0.00642108	0.98164
TRMT1L	0	0	8.84507e-06	3.2434e-06	1	0	0	0	0	0	1.66856	0.00641636	0.981654
TRIM72	0	0	1.35795e-05	1.6812e-06	1	0	0	0	0	0	1.6685	0.00641611	0.981668
SIGLEC11	0	0	1.01536e-05	2.82081e-06	1	0	0	0	0	0	1.66803	0.00641432	0.981681
ARFGAP2	0	0	1.10186e-05	2.57671e-06	1	0	0	0	0	0	1.66608	0.00640687	0.981695
ATP6V1B1	0	0	1.12818e-05	2.49656e-06	1	0	0	0	0	0	1.66576	0.00640566	0.981709
PHF1	0	0	1.0359e-05	2.81617e-06	1	0	0	0	0	0	1.66509	0.0064031	0.981722
SV2B	0	0	1.00338e-05	2.95197e-06	1	0	0	0	0	0	1.66379	0.00639812	0.981736
DLGAP5	0	0	6.34405e-06	4.19812e-06	1	0	0	0	0	0	1.66298	0.00639503	0.98175
MKS1	0	0	9.50323e-06	3.14779e-06	1	0	0	0	0	0	1.66287	0.00639461	0.981763
COL23A1	0	0	9.51752e-06	3.18578e-06	1	0	0	0	0	0	1.66089	0.00638707	0.981777
EFCAB13	0	0	7.71756e-06	3.79016e-06	1	0	0	0	0	0	1.66063	0.00638607	0.98179
NARS	0	0	9.10356e-06	3.3329e-06	1	0	0	0	0	0	1.66045	0.00638536	0.981804
ILVBL	0	0	1.15421e-05	2.53121e-06	1	0	0	0	0	0	1.66018	0.00638433	0.981817
SLC6A2	0	0	1.08897e-05	2.74802e-06	1	0	0	0	0	0	1.66012	0.00638411	0.98183
GPRC6A	0	0	1.00116e-05	3.07109e-06	1	0	0	0	0	0	1.65863	0.0063784	0.981844
MDM1	0	0	9.01168e-06	3.42528e-06	1	0	0	0	0	0	1.6576	0.00637447	0.981857
CLCA4	0	0	9.18058e-06	3.42422e-06	1	0	0	0	0	0	1.65506	0.00636478	0.981871
SCNN1G	0	0	1.13642e-05	2.70094e-06	1	0	0	0	0	0	1.65506	0.00636476	0.981884
RGS14	0	0	1.16402e-05	2.61792e-06	1	0	0	0	0	0	1.65468	0.00636334	0.981897
GPI	0	0	1.13327e-05	2.73843e-06	1	0	0	0	0	0	1.65381	0.00636	0.98191
KIF9	0	0	9.54294e-06	3.34761e-06	1	0	0	0	0	0	1.65305	0.0063571	0.981924
FGA	0	0	9.41652e-06	3.40944e-06	1	0	0	0	0	0	1.65214	0.00635362	0.981937
LRP10	0	0	1.17081e-05	2.65574e-06	1	0	0	0	0	0	1.65191	0.00635275	0.98195
MMP17	0	0	1.27058e-05	2.3598e-06	1	0	0	0	0	0	1.6504	0.00634696	0.981963
INTU	0	0	8.85145e-06	3.66187e-06	1	0	0	0	0	0	1.64918	0.00634229	0.981976
DRC1	0	0	9.6525e-06	3.41629e-06	1	0	0	0	0	0	1.64823	0.00633869	0.98199
KCNA3	0	0	1.41725e-05	1.93402e-06	1	0	0	0	0	0	1.64782	0.0063371	0.982003
CHDH	0	0	1.29952e-05	2.34121e-06	1	0	0	0	0	0	1.64688	0.00633351	0.982016
PPEF2	0	0	1.06675e-05	3.15134e-06	1	0	0	0	0	0	1.64496	0.00632618	0.982029
XPNPEP1	0	0	1.04645e-05	3.22999e-06	1	0	0	0	0	0	1.64444	0.00632418	0.982042
SLC26A4	0	0	1.04997e-05	3.23751e-06	1	0	0	0	0	0	1.64356	0.00632083	0.982055
AOC2	0	0	1.12882e-05	2.97671e-06	1	0	0	0	0	0	1.64356	0.00632082	0.982068
UVSSA	0	0	1.20516e-05	2.72903e-06	1	0	0	0	0	0	1.64336	0.00632005	0.982081
LRRN2	0	0	1.35984e-05	2.30405e-06	1	0	0	0	0	0	1.6395	0.00630533	0.982094
KIFC1	0	0	1.2346e-05	2.72903e-06	1	0	0	0	0	0	1.63892	0.00630311	0.982106
UBASH3A	0	0	1.16401e-05	3.00717e-06	1	0	0	0	0	0	1.63686	0.00629524	0.982119
EEF1D	0	0	1.25008e-05	2.72408e-06	1	0	0	0	0	0	1.63682	0.00629508	0.982132
KIF2A	0	0	1.06266e-05	3.40648e-06	1	0	0	0	0	0	1.63395	0.00628411	0.982145
N4BP2L2	0	0	8.03596e-06	4.32586e-06	1	0	0	0	0	0	1.63131	0.00627402	0.982158
TAP1	0	0	1.05547e-05	3.49564e-06	1	0	0	0	0	0	1.63099	0.00627278	0.982171
PNPT1	0	0	8.26526e-06	4.27671e-06	1	0	0	0	0	0	1.63008	0.0062693	0.982183
ARHGEF16	0	0	1.21385e-05	2.99368e-06	1	0	0	0	0	0	1.63	0.00626901	0.982196
CD44	0	0	1.11926e-05	3.30769e-06	1	0	0	0	0	0	1.62994	0.00626876	0.982209
SLC27A4	0	0	1.37592e-05	2.51371e-06	1	0	0	0	0	0	1.62757	0.0062597	0.982221
DMGDH	0	0	1.00457e-05	3.75645e-06	1	0	0	0	0	0	1.62682	0.00625687	0.982234
SMARCD2	0	0	1.24092e-05	2.99612e-06	1	0	0	0	0	0	1.62585	0.00625313	0.982247
HIF1A	0	0	9.80642e-06	3.86038e-06	1	0	0	0	0	0	1.62572	0.00625264	0.982259
DAGLB	0	0	1.26464e-05	2.93188e-06	1	0	0	0	0	0	1.62522	0.00625072	0.982272
LMF2	0	0	1.1762e-05	3.23051e-06	1	0	0	0	0	0	1.62491	0.00624955	0.982285
BCAM	0	0	1.28324e-05	2.90037e-06	1	0	0	0	0	0	1.62387	0.00624558	0.982297
GTPBP3	0	0	1.4103e-05	2.49906e-06	1	0	0	0	0	0	1.62312	0.0062427	0.98231
ZNF836	0	0	1.25984e-05	3.00313e-06	1	0	0	0	0	0	1.62271	0.00624115	0.982322
XKR7	0	0	1.60942e-05	1.86963e-06	1	0	0	0	0	0	1.62209	0.00623876	0.982335
PLA2G4E	0	0	8.89006e-06	4.26123e-06	1	0	0	0	0	0	1.62139	0.00623609	0.982347
L3MBTL3	0	0	1.14608e-05	3.43125e-06	1	0	0	0	0	0	1.62035	0.00623211	0.982359
NTN3	0	0	1.56203e-05	2.10297e-06	1	0	0	0	0	0	1.61855	0.00622523	0.982372
GOLGA1	0	0	9.84366e-06	4.01075e-06	1	0	0	0	0	0	1.61839	0.00622463	0.982384
WHAMM	0	0	1.18785e-05	3.34623e-06	1	0	0	0	0	0	1.61796	0.00622299	0.982396
GGA3	0	0	1.27461e-05	3.06327e-06	1	0	0	0	0	0	1.61781	0.00622241	0.982409
GFM2	0	0	1.1045e-05	3.6426e-06	1	0	0	0	0	0	1.61703	0.00621944	0.982421
CSF3R	0	0	1.07379e-05	3.74732e-06	1	0	0	0	0	0	1.6169	0.00621893	0.982433
STOX1	0	0	1.05571e-05	3.81555e-06	1	0	0	0	0	0	1.61652	0.0062175	0.982446
MTMR11	0	0	1.02236e-05	3.92687e-06	1	0	0	0	0	0	1.61649	0.00621738	0.982458
ZSCAN29	0	0	1.25311e-05	3.16528e-06	1	0	0	0	0	0	1.61641	0.00621706	0.98247
C2orf71	0	0	9.17433e-06	4.33251e-06	1	0	0	0	0	0	1.61394	0.00620763	0.982482
PDE9A	0	0	1.17614e-05	3.50041e-06	1	0	0	0	0	0	1.61278	0.00620318	0.982494
ASCC2	0	0	1.23351e-05	3.33653e-06	1	0	0	0	0	0	1.61163	0.00619879	0.982506
TARSL2	0	0	1.14196e-05	3.7114e-06	1	0	0	0	0	0	1.6084	0.00618643	0.982519
PNISR	0	0	1.03945e-05	4.05887e-06	1	0	0	0	0	0	1.60805	0.0061851	0.982531
ZNF185	0	0	1.12334e-05	3.7902e-06	1	0	0	0	0	0	1.60763	0.0061835	0.982543
FAM129A	0	0	1.11648e-05	3.83591e-06	1	0	0	0	0	0	1.6066	0.00617958	0.982555
WDR60	0	0	1.10536e-05	5.091e-06	2	0	0	2	0	0	1.60535	0.00617479	0.982567
PHTF1	0	0	1.15385e-05	3.7652e-06	1	0	0	0	0	0	1.60424	0.00617054	0.982579
DSG2	0	0	1.11065e-05	3.92832e-06	1	0	0	0	0	0	1.60335	0.00616712	0.982591
AMPH	0	0	1.27859e-05	3.39702e-06	1	0	0	0	0	0	1.60228	0.00616307	0.982603
CCDC146	0	0	9.46937e-06	4.52146e-06	1	0	0	0	0	0	1.60114	0.0061587	0.982615
SH3BP2	0	0	1.49147e-05	2.73352e-06	1	0	0	0	0	0	1.60065	0.00615681	0.982627
F12	0	0	1.47049e-05	2.84844e-06	1	0	0	0	0	0	1.5986	0.00614898	0.982639
NYAP2	0	0	1.57797e-05	2.57577e-06	1	0	0	0	0	0	1.59506	0.00613544	0.98265
PIWIL3	0	0	1.10828e-05	4.2125e-06	1	0	0	0	0	0	1.5911	0.0061203	0.982662
COX7C	0	0	1.10799e-06	2.34346e-07	0	0	1	0	0	0	1.58931	0.00611347	0.982674
CEP104	0	0	1.41963e-05	4.45543e-06	2	0	0	2	0	0	1.58747	0.00610643	0.982686
GTF3C3	0	0	1.16145e-05	4.12356e-06	1	0	0	0	0	0	1.58725	0.0061056	0.982698
ORC1	0	0	1.1459e-05	4.20504e-06	1	0	0	0	0	0	1.58593	0.00610055	0.98271
MCM10	0	0	1.21354e-05	3.98549e-06	1	0	0	0	0	0	1.58574	0.00609983	0.982721
STAT5B	0	0	1.28043e-05	3.77023e-06	1	0	0	0	0	0	1.58549	0.00609887	0.982733
LUZP1	0	0	1.17092e-05	4.13606e-06	1	0	0	0	0	0	1.58532	0.00609822	0.982745
USP53	0	0	1.06505e-05	4.5303e-06	1	0	0	0	0	0	1.58342	0.00609095	0.982757
GNG7	0	0	1.54908e-06	2.41349e-07	0	0	1	0	0	0	1.58244	0.00608721	0.982768
NAT1	0	0	3.16696e-06	1.33307e-06	1	1	0	2	0	0	1.58166	0.00608422	0.98278
BMPER	0	0	1.06193e-05	3.11411e-06	1	1	0	0	1	0	1.57892	0.00607374	0.982792
NSUN7	0	0	7.14885e-06	2.98168e-06	2	0	0	1	0	1	1.57707	0.00606666	0.982803
SP140	0	0	1.18055e-05	4.30678e-06	1	0	0	0	0	0	1.57644	0.00606425	0.982815
EXD3	0	0	1.40862e-05	3.59749e-06	1	0	0	0	0	0	1.57453	0.00605696	0.982827
TMPRSS15	0	0	1.09414e-05	4.63802e-06	1	0	0	0	0	0	1.57448	0.00605676	0.982838
TCHH	0	0	3.98475e-05	9.45705e-06	2	0	0	1	0	0	1.57304	0.00605125	0.98285
TMTC1	0	0	1.30115e-05	4.00578e-06	1	0	0	0	0	0	1.57217	0.00604793	0.982861
MCM4	0	0	1.43449e-05	3.57251e-06	1	0	0	0	0	0	1.5719	0.00604691	0.982873
TMC5	0	0	1.15922e-05	4.50703e-06	1	0	0	0	0	0	1.57078	0.00604262	0.982884
MSH2	0	0	1.32126e-05	3.99383e-06	1	0	0	0	0	0	1.5698	0.00603886	0.982896
SEMA4B	0	0	1.44738e-05	3.63711e-06	1	0	0	0	0	0	1.56724	0.00602908	0.982907
L3MBTL1	0	0	1.35861e-05	3.93494e-06	1	0	0	0	0	0	1.567	0.00602816	0.982919
TMC2	0	0	1.29365e-05	4.15252e-06	1	0	0	0	0	0	1.56686	0.00602762	0.98293
TRAPPC12	0	0	1.67754e-05	2.89966e-06	1	0	0	0	0	0	1.56648	0.00602619	0.982941
HCN2	0	0	1.69704e-05	2.83919e-06	1	0	0	0	0	0	1.56634	0.00602565	0.982953
ARHGEF26	0	0	1.36501e-05	3.93142e-06	1	0	0	0	0	0	1.56623	0.00602523	0.982964
BUB1	0	0	1.15489e-05	4.63047e-06	1	0	0	0	0	0	1.56604	0.00602448	0.982975
ARHGEF19	0	0	1.41051e-05	3.8092e-06	1	0	0	0	0	0	1.56503	0.00602064	0.982987
MAP4K3	0	0	1.23095e-05	4.40298e-06	1	0	0	0	0	0	1.56498	0.00602043	0.982998
AP4E1	0	0	1.11916e-05	4.82893e-06	1	0	0	0	0	0	1.56257	0.00601122	0.983009
MKI67	0	0	3.61757e-05	1.09541e-05	2	0	0	1	0	0	1.55894	0.00599734	0.983021
HPS3	0	0	1.35451e-05	4.14793e-06	1	0	0	0	0	0	1.55835	0.00599508	0.983032
CR1	1	0	4.33395e-05	1.12959e-05	0	0	0	3	0	0	1.55784	0.00599312	0.983043
RASGRP4	0	0	1.58665e-05	3.40916e-06	1	0	0	0	0	0	1.55728	0.00599101	0.983054
ZNF341	0	0	1.54645e-05	3.54701e-06	1	0	0	0	0	0	1.55702	0.00599001	0.983065
SPACA7	0	0	1.12057e-06	9.82609e-07	0	0	1	0	0	0	1.55624	0.00598703	0.983077
PDPR	0	0	1.42719e-05	3.95747e-06	1	0	0	0	0	0	1.55623	0.00598697	0.983088
MPHOSPH6	0	0	1.29508e-06	7.55991e-07	0	1	0	0	0	0	1.55607	0.00598638	0.983099
C2	0	0	1.54114e-05	3.59898e-06	1	0	0	0	0	0	1.55553	0.00598431	0.98311
ULK4	0	0	1.31492e-05	5.55029e-06	2	0	0	2	0	0	1.55487	0.00598178	0.983121
ZNF568	0	0	1.15062e-05	4.90603e-06	1	0	0	0	0	0	1.55473	0.00598125	0.983132
SAMD4A	0	0	1.64134e-05	3.30134e-06	1	0	0	0	0	0	1.5542	0.00597921	0.983143
CATSPERB	0	0	1.19795e-05	4.76605e-06	1	0	0	0	0	0	1.554	0.00597847	0.983154
SNAP91	0	0	1.51797e-05	3.73272e-06	1	0	0	0	0	0	1.55304	0.00597479	0.983165
LRP1B	1	0	6.39906e-05	2.03598e-05	0	0	0	1	0	0	1.55166	0.00596952	0.983176
TRPC3	0	0	1.60096e-05	3.5483e-06	1	0	0	0	0	0	1.54925	0.0059603	0.983187
TGM1	0	0	1.57693e-05	3.67372e-06	1	0	0	0	0	0	1.54725	0.00595263	0.983198
KIAA1324L	0	0	1.40815e-05	4.2425e-06	1	0	0	0	0	0	1.54666	0.00595037	0.983209
FNBP4	0	0	1.27925e-05	4.68948e-06	1	0	0	0	0	0	1.54573	0.00594684	0.98322
TP73	0	0	1.79005e-05	3.09402e-06	1	0	0	0	0	0	1.5422	0.00593332	0.983231
MAP7	0	0	1.54037e-05	3.92727e-06	1	0	0	0	0	0	1.54152	0.00593073	0.983242
GGTLC1	0	0	2.23687e-06	8.01625e-07	0	1	0	0	0	0	1.54044	0.00592658	0.983253
MAML1	0	0	1.69055e-05	3.4726e-06	1	0	0	0	0	0	1.53991	0.00592456	0.983263
ELAC2	0	0	1.55658e-05	3.91303e-06	1	0	0	0	0	0	1.53985	0.00592435	0.983274
ITGA9	0	0	1.35642e-05	4.58274e-06	1	0	0	0	0	0	1.5394	0.0059226	0.983285
PDCL3	0	0	2.38936e-06	9.47485e-07	0	0	1	0	0	0	1.53936	0.00592247	0.983296
RAG1	0	0	1.76304e-05	3.28335e-06	1	0	0	0	0	0	1.53787	0.00591675	0.983307
TMEM67	0	0	1.22812e-05	5.04309e-06	1	0	0	0	0	0	1.53786	0.00591672	0.983317
LITAF	0	0	3.49095e-06	6.58196e-07	0	0	1	0	0	0	1.53595	0.00590944	0.983328
DNM3	0	0	1.50801e-05	4.21119e-06	1	0	0	0	0	0	1.53394	0.00590176	0.983339
DIS3L	0	0	1.36011e-05	4.70967e-06	1	0	0	0	0	0	1.53347	0.00589994	0.983349
XRN2	0	0	1.34767e-05	4.81294e-06	1	0	0	0	0	0	1.53083	0.00588985	0.98336
SEMA4G	0	0	1.64422e-05	3.91168e-06	1	0	0	0	0	0	1.52767	0.00587775	0.983371
PCDHGA12	0	0	1.88331e-05	3.14897e-06	1	0	0	0	0	0	1.52688	0.00587473	0.983381
USP4	0	0	1.42639e-05	4.6482e-06	1	0	0	0	0	0	1.5268	0.00587444	0.983392
TMEM65	0	0	3.39315e-06	9.05875e-07	0	0	1	0	0	0	1.52676	0.00587427	0.983403
NFAM1	0	0	2.70163e-06	1.19939e-06	0	0	1	0	0	0	1.52412	0.00586416	0.983413
NXPH1	0	0	3.37218e-06	1.00507e-06	0	0	1	0	0	0	1.52283	0.00585925	0.983424
MATN2	0	0	1.65488e-05	4.027e-06	1	0	0	0	0	0	1.52131	0.00585343	0.983434
PARP10	0	0	1.66111e-05	4.03291e-06	1	0	0	0	0	0	1.5202	0.00584918	0.983445
AXL	0	0	1.76907e-05	3.78849e-06	1	0	0	0	0	0	1.51561	0.00583161	0.983456
TBC1D2B	0	0	1.69702e-05	4.03e-06	1	0	0	0	0	0	1.51536	0.00583068	0.983466
ABLIM2	0	0	1.80596e-05	3.67497e-06	1	0	0	0	0	0	1.51531	0.00583048	0.983477
PCDHGB7	0	0	1.87695e-05	3.44475e-06	1	0	0	0	0	0	1.51525	0.00583025	0.983487
RAP2B	0	0	5.21851e-06	6.06521e-07	0	0	1	0	0	0	1.5136	0.00582395	0.983498
GARNL3	0	0	1.48046e-05	4.78773e-06	1	0	0	0	0	0	1.51342	0.00582324	0.983508
SAMD9L	0	0	1.24173e-05	5.57693e-06	1	0	0	0	0	0	1.5134	0.00582319	0.983518
CEP135	0	0	1.1379e-05	5.92394e-06	1	0	0	0	0	0	1.51331	0.00582282	0.983529
TRAM1L1	0	0	3.59376e-06	1.16792e-06	0	0	1	0	0	0	1.51279	0.00582085	0.983539
DENND2A	0	0	1.62741e-05	4.33699e-06	1	0	0	0	0	0	1.51206	0.00581803	0.98355
SNRPA1	0	0	3.71829e-06	1.15076e-06	0	0	1	0	0	0	1.51176	0.00581689	0.98356
OAS3	0	0	1.61289e-05	4.40588e-06	1	0	0	0	0	0	1.51117	0.00581463	0.98357
TPK1	0	0	3.58753e-06	1.03764e-06	0	1	0	0	0	0	1.51112	0.00581444	0.983581
ZFR2	0	0	1.62132e-05	4.40367e-06	1	0	0	0	0	0	1.5101	0.00581054	0.983591
CBLB	0	0	1.63184e-05	4.4355e-06	1	0	0	0	0	0	1.50732	0.00579992	0.983601
FGF12	0	0	4.19287e-06	1.113e-06	0	0	1	0	0	0	1.50667	0.00579742	0.983612
KCNIP4	0	0	3.19494e-06	1.31706e-06	0	1	0	0	0	0	1.50489	0.0057906	0.983622
NTRK1	0	0	1.93147e-05	3.54031e-06	1	0	0	0	0	0	1.50379	0.00578641	0.983632
RAB11FIP1	0	0	1.78473e-05	4.01964e-06	1	0	0	0	0	0	1.50377	0.00578634	0.983642
HFM1	0	0	1.3356e-05	6.7206e-06	2	0	0	2	0	0	1.50253	0.00578159	0.983653
TMPRSS6	0	0	1.85123e-05	3.83708e-06	1	0	0	0	0	0	1.50232	0.0057808	0.983663
ANO6	0	0	1.51893e-05	4.95666e-06	1	0	0	0	0	0	1.50107	0.00577601	0.983673
ANKIB1	0	0	1.5567e-05	4.84577e-06	1	0	0	0	0	0	1.50051	0.00577387	0.983683
GRID1	0	0	1.88847e-05	3.77138e-06	1	0	0	0	0	0	1.5	0.0057719	0.983693
ITGA2	0	0	1.39367e-05	5.42048e-06	1	0	0	0	0	0	1.49897	0.00576795	0.983703
TNPO3	0	0	1.56077e-05	4.93454e-06	1	0	0	0	0	0	1.49627	0.00575764	0.983714
ITGA8	0	0	1.48097e-05	5.20876e-06	1	0	0	0	0	0	1.4958	0.00575584	0.983724
GTF3C2	0	0	1.53586e-05	5.08544e-06	1	0	0	0	0	0	1.49342	0.00574673	0.983734
DOCK4	0	0	3.24071e-05	9.82715e-06	0	1	1	0	0	0	1.49153	0.0057395	0.983744
FRMPD2	0	0	1.45217e-05	5.4265e-06	1	0	0	0	0	0	1.49072	0.00573642	0.983754
AQP2	0	0	5.54981e-06	1.05204e-06	0	0	1	0	0	0	1.49029	0.00573474	0.983764
TBC1D32	0	0	1.33098e-05	5.89274e-06	1	0	0	0	0	0	1.48802	0.00572608	0.983774
CCDC158	0	0	1.63047e-05	4.91809e-06	1	0	0	0	0	0	1.48748	0.00572401	0.983784
SUPT16H	0	0	1.49131e-05	5.40375e-06	1	0	0	0	0	0	1.48634	0.00571965	0.983794
PRSS36	0	0	1.95194e-05	3.91659e-06	1	0	0	0	0	0	1.48541	0.00571607	0.983804
REV1	0	0	1.513e-05	5.35926e-06	1	0	0	0	0	0	1.48523	0.0057154	0.983814
SH3TC2	0	0	1.70255e-05	4.78128e-06	1	0	0	0	0	0	1.48337	0.00570829	0.983824
TBC1D9	0	0	1.56851e-05	5.2465e-06	1	0	0	0	0	0	1.48235	0.00570439	0.983834
FILIP1	0	0	1.66946e-05	5.13187e-06	1	0	0	0	0	0	1.47346	0.00567036	0.983844
PDGFRA	0	0	1.8251e-05	4.62476e-06	1	0	0	0	0	0	1.47334	0.00566989	0.983854
COL9A1	0	0	1.68874e-05	5.09089e-06	1	0	0	0	0	0	1.47255	0.00566688	0.983864
NRXN1	0	0	3.64533e-05	7.01424e-06	0	2	1	0	1	0	1.46918	0.005654	0.983874
HOMER1	0	0	5.17739e-06	1.7471e-06	0	0	1	0	0	0	1.46674	0.00564464	0.983884
KCNH3	0	0	1.94597e-05	4.39837e-06	1	0	0	0	0	0	1.46647	0.00564363	0.983893
LILRB4	0	0	4.93763e-06	1.88258e-06	0	0	1	0	0	0	1.46447	0.00563598	0.983903
MSH6	0	0	1.61567e-05	5.65076e-06	1	0	0	0	0	0	1.45958	0.00561723	0.983913
CDKN2AIP	0	0	5.08449e-06	2.06882e-06	0	0	1	0	0	0	1.4549	0.00559935	0.983923
FGFR4	0	0	2.22376e-05	3.84684e-06	1	0	0	0	0	0	1.45223	0.00558913	0.983933
XPO5	0	0	1.58493e-05	6.05941e-06	1	0	0	0	0	0	1.44722	0.00556994	0.983943
AKNA	0	0	1.6858e-05	5.77248e-06	1	0	0	0	0	0	1.44542	0.00556304	0.983953
HECTD1	0	0	4.05531e-05	1.23351e-05	2	0	0	1	0	0	1.44493	0.00556118	0.983962
MAP2K6	0	0	5.63283e-06	2.13564e-06	0	0	1	0	0	0	1.44481	0.00556072	0.983972
TTC21A	0	0	1.76035e-05	5.56299e-06	1	0	0	0	0	0	1.444	0.00555763	0.983982
SUCLG2	0	0	5.74534e-06	1.98337e-06	0	1	0	0	0	0	1.44249	0.00555184	0.983992
CLSTN1	0	0	2.21258e-05	4.16164e-06	1	0	0	0	0	0	1.44105	0.00554632	0.984002
METTL22	0	0	6.24074e-06	1.87355e-06	0	1	0	0	0	0	1.44027	0.00554333	0.984011
GCC2	0	0	1.2215e-05	7.4752e-06	1	0	0	0	0	0	1.43877	0.00553761	0.984021
SUCLA2	0	0	5.69123e-06	2.10392e-06	0	1	0	0	0	0	1.43838	0.00553609	0.984031
SLC12A6	0	0	1.70007e-05	5.91548e-06	1	0	0	0	0	0	1.43785	0.00553406	0.984041
ITGA7	0	0	2.1203e-05	5.75659e-06	2	0	0	2	0	0	1.43691	0.0055305	0.98405
TEX14	0	0	1.47755e-05	6.72685e-06	1	0	0	0	0	0	1.43476	0.00552226	0.98406
WDR11	0	0	1.8482e-05	5.50789e-06	1	0	0	0	0	0	1.43473	0.00552213	0.98407
RAB3GAP2	0	0	1.48501e-05	6.71341e-06	1	0	0	0	0	0	1.43432	0.00552056	0.984079
MNS1	0	0	5.08156e-06	2.4254e-06	0	1	0	0	0	0	1.43366	0.00551805	0.984089
ANO1	0	0	2.10591e-05	4.7484e-06	1	0	0	0	0	0	1.43148	0.0055097	0.984099
TOPBP1	0	0	1.57387e-05	6.57021e-06	1	0	0	0	0	0	1.42838	0.00549782	0.984108
YWHAE	0	0	2.92644e-06	1.14867e-06	0	0	2	0	0	1	1.42817	0.00549704	0.984118
TEK	0	0	2.07255e-05	4.96805e-06	1	0	0	0	0	0	1.42708	0.00549287	0.984127
SPNS3	0	0	6.79439e-06	2.02502e-06	0	1	0	0	0	0	1.42685	0.00549198	0.984137
ITGAX	0	0	1.97484e-05	5.35611e-06	1	0	0	0	0	0	1.42434	0.00548239	0.984147
HDAC5	0	0	2.13928e-05	4.83812e-06	1	0	0	0	0	0	1.42364	0.00547967	0.984156
NEIL3	0	0	7.03445e-06	2.20004e-06	0	0	1	0	0	0	1.42357	0.00547943	0.984166
BMP4	0	0	8.99024e-06	1.60377e-06	0	0	1	0	0	0	1.42147	0.00547138	0.984175
MICALCL	0	0	5.50979e-06	2.80281e-06	0	0	1	0	0	0	1.41984	0.00546516	0.984185
WDR17	0	0	1.77803e-05	6.11948e-06	1	0	0	0	0	0	1.41967	0.00546449	0.984194
HIPK1	0	0	2.15644e-05	4.98955e-06	1	0	0	0	0	0	1.41548	0.00544847	0.984204
FAM114A1	0	0	7.16017e-06	2.2176e-06	0	1	0	0	0	0	1.41441	0.00544436	0.984213
RIOK2	0	0	7.03918e-06	2.33688e-06	0	1	0	0	0	0	1.4113	0.00543245	0.984223
BAG3	0	0	7.83257e-06	2.25367e-06	0	0	1	0	0	0	1.41098	0.00543122	0.984232
AIM1	0	0	1.57785e-05	7.00944e-06	1	0	0	0	0	0	1.41065	0.00542996	0.984242
CDK14	0	0	8.01405e-06	2.1104e-06	0	1	0	0	0	0	1.40747	0.00541777	0.984251
ATAD2	0	0	1.57243e-05	7.12854e-06	1	0	0	0	0	0	1.40672	0.00541491	0.98426
SLC12A2	0	0	2.13768e-05	5.27845e-06	1	0	0	0	0	0	1.40658	0.00541438	0.98427
ATRNL1	0	0	1.86742e-05	6.20833e-06	1	0	0	0	0	0	1.40475	0.00540739	0.984279
LRRTM4	0	0	8.28764e-06	2.19944e-06	0	1	0	0	0	0	1.40043	0.00539084	0.984289
KNG1	0	0	6.54277e-06	2.96462e-06	0	0	1	0	0	0	1.39997	0.00538907	0.984298
DNAH9	1	0	5.60773e-05	1.82052e-05	0	0	0	2	0	0	1.39651	0.00537583	0.984307
CLEC16A	0	0	2.44501e-05	4.54637e-06	1	0	0	0	0	0	1.3963	0.00537504	0.984317
DHX57	0	0	1.94865e-05	6.23841e-06	1	0	0	0	0	0	1.3933	0.00536355	0.984326
PDZRN3	0	0	2.72627e-05	3.74843e-06	1	0	0	0	0	0	1.39214	0.00535909	0.984335
ESYT1	0	0	2.03023e-05	6.03532e-06	1	0	0	0	0	0	1.39085	0.00535416	0.984345
CDYL2	0	0	9.10759e-06	2.21591e-06	0	1	0	0	0	0	1.38922	0.00534792	0.984354
PIAS2	0	0	7.3882e-06	2.80512e-06	0	1	0	0	0	0	1.38853	0.00534526	0.984363
CPS1	0	0	2.02681e-05	6.30913e-06	1	0	0	0	0	0	1.38079	0.00531564	0.984373
TNP2	0	0	1.17039e-06	4.5502e-07	1	0	0	1	0	0	1.37575	0.00529632	0.984382
THBS2	0	0	2.49812e-05	4.93752e-06	1	0	0	0	0	0	1.3747	0.0052923	0.984391
CNKSR3	0	0	9.30167e-06	2.74135e-06	0	0	1	0	0	0	1.37318	0.00528648	0.9844
PXDNL	0	0	2.02765e-05	6.50673e-06	1	0	0	0	0	0	1.37317	0.00528646	0.98441
NXN	0	0	1.15656e-05	2.01342e-06	0	0	1	0	0	0	1.37238	0.00528344	0.984419
KRTAP4-4	0	0	1.16033e-06	5.82858e-07	1	0	0	1	0	0	1.37097	0.00527802	0.984428
POLG	0	0	2.32098e-05	5.61042e-06	1	0	0	0	0	0	1.37092	0.00527784	0.984437
ATP10B	0	0	2.18039e-05	6.10277e-06	1	0	0	0	0	0	1.36959	0.00527274	0.984447
ATL2	0	0	7.47086e-06	3.30122e-06	0	1	0	0	0	0	1.36846	0.0052684	0.984456
PYY	0	0	1.9777e-06	3.91275e-07	1	0	0	1	0	0	1.36781	0.00526593	0.984465
PLEKHH2	0	0	1.92736e-05	7.00414e-06	1	0	0	0	0	0	1.36678	0.00526199	0.984474
SYMPK	0	0	2.47239e-05	5.29659e-06	1	0	0	0	0	0	1.36423	0.00525223	0.984483
FBXW11	0	0	9.23123e-06	3.00016e-06	0	0	1	0	0	0	1.36421	0.00525216	0.984493
NCAN	0	0	2.43373e-05	5.43642e-06	1	0	0	0	0	0	1.36367	0.00525009	0.984502
GEMIN6	0	0	1.75973e-06	6.47087e-07	1	0	0	1	0	0	1.36084	0.00523924	0.984511
NPR3	0	0	1.11467e-05	2.45799e-06	0	0	1	0	0	0	1.36072	0.00523879	0.98452
A1CF	0	0	9.01516e-06	3.18771e-06	0	0	1	0	0	0	1.35983	0.00523536	0.984529
TNS3	0	0	2.39719e-05	5.68677e-06	1	0	0	0	0	0	1.3587	0.00523106	0.984538
MED23	0	0	2.17721e-05	6.41495e-06	1	0	0	0	0	0	1.35821	0.00522917	0.984547
FGFBP2	0	0	1.69932e-06	8.22747e-07	1	0	0	1	0	0	1.35495	0.00521667	0.984556
SAPCD1	0	0	1.29839e-06	9.87576e-07	1	0	0	1	0	0	1.3538	0.00521228	0.984565
CHSY1	0	0	1.02736e-05	2.98491e-06	0	0	1	0	0	0	1.35174	0.00520437	0.984574
TMEM253	0	0	2.00958e-06	8.50857e-07	1	0	0	1	0	0	1.34995	0.00519754	0.984583
IL23A	0	0	2.40348e-06	7.3929e-07	1	0	0	1	0	0	1.34918	0.00519459	0.984592
CLDN6	0	0	2.54972e-06	6.98568e-07	1	0	0	1	0	0	1.34887	0.0051934	0.984601
LGR5	0	0	8.80155e-06	3.55644e-06	0	0	1	0	0	0	1.34862	0.00519244	0.98461
FAM208B	0	0	1.56869e-05	8.67881e-06	1	0	0	0	0	0	1.34837	0.00519148	0.984619
APOB	0	0	3.77397e-05	1.58089e-05	2	0	0	1	0	0	1.34719	0.00518695	0.984628
OR51A7	0	0	2.3299e-06	8.73812e-07	1	0	0	1	0	0	1.34505	0.00517876	0.984637
INSR	0	0	2.3287e-05	6.35545e-06	1	0	0	0	0	0	1.34204	0.00516723	0.984646
HDAC4	0	0	2.87171e-05	4.63307e-06	1	0	0	0	0	0	1.34092	0.00516294	0.984655
MAP3K6	0	0	2.60141e-05	5.50725e-06	1	0	0	0	0	0	1.34074	0.00516225	0.984664
SLC6A19	0	0	1.11076e-05	3.00406e-06	0	0	1	0	0	0	1.34069	0.00516205	0.984673
TBCD	0	0	2.44564e-05	6.07071e-06	1	0	0	0	0	0	1.33853	0.00515378	0.984682
C17orf51	0	0	2.81911e-06	9.08942e-07	1	0	0	1	0	0	1.3376	0.00515021	0.984691
FGF6	0	0	3.20119e-06	7.96691e-07	1	0	0	1	0	0	1.33701	0.00514797	0.9847
ADAMTS12	0	0	2.37567e-05	6.37923e-06	1	0	0	0	0	0	1.33552	0.00514224	0.984709
CLEC12A	0	0	2.41423e-06	1.11425e-06	1	0	0	1	0	0	1.335	0.00514025	0.984717
OR5H6	0	0	2.78649e-06	1.00183e-06	1	0	0	1	0	0	1.33454	0.00513849	0.984726
SSC5D	0	0	2.52543e-05	5.95099e-06	1	0	0	0	0	0	1.33341	0.00513417	0.984735
PLCG2	0	0	2.35298e-05	6.52229e-06	1	0	0	0	0	0	1.33296	0.00513245	0.984744
CCDC59	0	0	2.57507e-06	1.12014e-06	1	0	0	1	0	0	1.33277	0.00513172	0.984753
TIPIN	0	0	2.1386e-06	1.34586e-06	1	0	0	1	0	0	1.32982	0.00512042	0.984761
LIMCH1	0	0	2.4388e-05	6.33211e-06	1	0	0	0	0	0	1.32971	0.00511999	0.98477
ARHGDIG	0	0	3.31337e-06	9.67264e-07	1	0	0	1	0	0	1.32927	0.0051183	0.984779
CYB561D2	0	0	3.30893e-06	1.01592e-06	1	0	0	1	0	0	1.32752	0.00511159	0.984788
NMI	0	0	2.46621e-06	1.30485e-06	1	0	0	1	0	0	1.32727	0.00511064	0.984796
OR10A3	0	0	3.03653e-06	1.11379e-06	1	0	0	1	0	0	1.32727	0.00511064	0.984805
LY6G6F	0	0	2.72081e-06	1.2474e-06	1	0	0	1	0	0	1.32624	0.00510669	0.984814
EXO5	0	0	2.89024e-06	1.20493e-06	1	0	0	1	0	0	1.32571	0.00510466	0.984823
RFPL3	0	0	3.26445e-06	1.12483e-06	1	0	0	1	0	0	1.32404	0.00509826	0.984831
SLC35G5	0	0	3.85173e-06	9.93003e-07	1	0	0	1	0	0	1.32165	0.00508913	0.98484
MAST3	0	0	2.74126e-05	5.58506e-06	1	0	0	0	0	0	1.32127	0.00508767	0.984849
RWDD2B	0	0	2.88577e-06	1.33068e-06	1	0	0	1	0	0	1.32112	0.00508708	0.984857
NLRC5	0	0	2.06866e-05	7.80326e-06	1	0	0	0	0	0	1.32003	0.00508292	0.984866
CD1C	0	0	2.64824e-06	1.47787e-06	1	0	0	1	0	0	1.31863	0.00507755	0.984875
ODF3L1	0	0	3.5616e-06	1.20247e-06	1	0	0	1	0	0	1.31751	0.00507326	0.984883
ROBO2	0	0	2.4595e-05	6.62762e-06	1	0	0	0	0	0	1.31646	0.00506922	0.984892
SFI1	0	0	2.39504e-05	6.86477e-06	1	0	0	0	0	0	1.31544	0.00506534	0.9849
WBP2NL	0	0	3.01559e-06	1.44274e-06	1	0	0	1	0	0	1.3154	0.00506517	0.984909
ZNF670	0	0	3.03335e-06	1.44247e-06	1	0	0	1	0	0	1.31519	0.00506437	0.984918
MURC	0	0	3.947e-06	1.16917e-06	1	0	0	1	0	0	1.314	0.00505981	0.984926
HCAR1	0	0	4.4294e-06	1.10973e-06	1	0	0	1	0	0	1.31027	0.00504554	0.984935
SLC25A33	0	0	3.88131e-06	1.31284e-06	1	0	0	1	0	0	1.30954	0.00504274	0.984943
GPR151	0	0	3.58065e-06	1.41907e-06	1	0	0	1	0	0	1.30934	0.00504195	0.984952
STX6	0	0	3.84754e-06	1.33854e-06	1	0	0	1	0	0	1.30902	0.00504072	0.98496
ART5	0	0	3.99604e-06	1.29448e-06	1	0	0	1	0	0	1.30881	0.00503994	0.984969
CUBN	0	0	4.55789e-05	1.55402e-05	3	0	0	3	0	0	1.30877	0.00503976	0.984977
ZNF804A	0	0	9.68916e-06	4.1758e-06	0	1	0	0	0	0	1.30851	0.0050388	0.984986
FAM166A	0	0	4.21957e-06	1.25646e-06	1	0	0	1	0	0	1.30747	0.00503481	0.984994
KIF25	0	0	5.57028e-06	1.71666e-06	0	0	3	0	0	2	1.30746	0.00503475	0.985003
LRRC2	0	0	3.99244e-06	1.40845e-06	1	0	0	1	0	0	1.3047	0.00502419	0.985011
MPHOSPH8	0	0	1.28441e-05	3.43497e-06	0	0	1	0	0	0	1.30377	0.00502062	0.98502
PON1	0	0	3.47764e-06	1.63242e-06	1	0	0	1	0	0	1.30282	0.00501698	0.985028
DTNB	0	0	1.18089e-05	3.64257e-06	0	1	0	0	0	0	1.30237	0.00501526	0.985036
WISP3	0	0	4.02101e-06	1.4772e-06	1	0	0	1	0	0	1.30186	0.00501328	0.985045
YIF1A	0	0	5.06619e-06	1.15914e-06	1	0	0	1	0	0	1.30073	0.00500898	0.985053
ZNF646	0	0	2.73438e-05	6.19689e-06	1	0	0	0	0	0	1.2999	0.0050058	0.985062
YIPF2	0	0	4.69668e-06	1.31245e-06	1	0	0	1	0	0	1.29964	0.0050048	0.98507
CCDC3	0	0	5.53407e-06	1.04162e-06	1	0	0	1	0	0	1.29934	0.00500364	0.985078
IFIT3	0	0	3.5671e-06	1.69891e-06	1	0	0	1	0	0	1.29932	0.00500358	0.985087
TKT	0	0	1.59083e-05	2.5827e-06	0	0	1	0	0	0	1.29818	0.0049992	0.985095
CLDN16	0	0	5.02883e-06	1.27576e-06	1	0	0	1	0	0	1.29696	0.00499451	0.985103
NEDD9	0	0	1.31316e-05	3.52939e-06	0	0	1	0	0	0	1.29693	0.00499443	0.985112
B3GNT4	0	0	5.08688e-06	1.31447e-06	1	0	0	1	0	0	1.29486	0.00498646	0.98512
RGS12	0	0	2.94891e-05	5.67481e-06	1	0	0	0	0	0	1.29389	0.00498275	0.985128
ZNF547	0	0	5.30878e-06	1.27552e-06	1	0	0	1	0	0	1.29359	0.00498161	0.985136
SULT1A1	0	0	4.66354e-06	1.51318e-06	1	0	0	1	0	0	1.29278	0.00497852	0.985145
SFXN4	0	0	3.15124e-06	2.02747e-06	1	0	0	1	0	0	1.29249	0.00497739	0.985153
FAM221B	0	0	4.23361e-06	1.69158e-06	1	0	0	1	0	0	1.29153	0.00497373	0.985161
ZNF577	0	0	4.04813e-06	1.75392e-06	1	0	0	1	0	0	1.29152	0.00497368	0.985169
MC3R	0	0	6.71797e-06	8.80499e-07	1	0	0	1	0	0	1.29092	0.00497139	0.985178
PSD3	0	0	1.07784e-05	4.3034e-06	0	1	0	0	0	0	1.29087	0.0049712	0.985186
GPR182	0	0	5.60306e-06	1.26551e-06	1	0	0	1	0	0	1.29042	0.00496945	0.985194
SSTR4	0	0	6.21588e-06	1.09506e-06	1	0	0	1	0	0	1.28921	0.00496482	0.985202
GPR63	0	0	5.27444e-06	1.41048e-06	1	0	0	1	0	0	1.28914	0.00496456	0.98521
KNOP1	0	0	4.66662e-06	1.62322e-06	1	0	0	1	0	0	1.28879	0.0049632	0.985218
WDR72	0	0	9.75732e-06	4.70221e-06	0	1	0	0	0	0	1.28874	0.00496303	0.985227
PITPNM1	0	0	3.13312e-05	5.30455e-06	1	0	0	0	0	0	1.28606	0.00495276	0.985235
IGFN1	0	0	1.39099e-05	1.23694e-05	2	0	0	2	0	0	1.28016	0.00493014	0.985243
ZSCAN1	0	0	5.60197e-06	1.57562e-06	1	0	0	1	0	0	1.27931	0.0049269	0.985251
SLC18B1	0	0	4.54379e-06	1.95082e-06	1	0	0	1	0	0	1.27853	0.00492391	0.985259
FBXO39	0	0	5.80175e-06	1.54724e-06	1	0	0	1	0	0	1.27795	0.00492168	0.985267
FAM175A	0	0	4.50668e-06	1.98164e-06	1	0	0	1	0	0	1.27788	0.00492139	0.985275
OAT	0	0	4.37283e-06	2.03756e-06	1	0	0	1	0	0	1.27748	0.00491987	0.985283
NGDN	0	0	5.3441e-06	1.72e-06	1	0	0	1	0	0	1.27723	0.00491893	0.985291
BLZF1	0	0	5.29714e-06	1.74179e-06	1	0	0	1	0	0	1.27701	0.00491809	0.985299
KRR1	0	0	5.02521e-06	1.86083e-06	1	0	0	1	0	0	1.27601	0.00491424	0.985307
SLC17A1	0	0	4.47349e-06	2.05844e-06	1	0	0	1	0	0	1.27554	0.00491243	0.985315
C9orf24	0	0	5.6422e-06	1.68089e-06	1	0	0	1	0	0	1.27509	0.0049107	0.985324
NCEH1	0	0	6.02231e-06	1.55546e-06	1	0	0	1	0	0	1.27504	0.00491053	0.985332
PIPOX	0	0	5.07972e-06	1.91574e-06	1	0	0	1	0	0	1.27341	0.00490428	0.98534
PNPLA7	0	0	3.0593e-05	5.92791e-06	1	0	0	0	0	0	1.27235	0.00490023	0.985347
KIAA0430	0	0	2.83013e-05	6.68821e-06	1	0	0	0	0	0	1.2715	0.00489695	0.985355
CCDC84	0	0	5.5594e-06	1.81073e-06	1	0	0	1	0	0	1.27146	0.00489679	0.985363
GLT8D1	0	0	5.47649e-06	1.85351e-06	1	0	0	1	0	0	1.27092	0.00489474	0.985371
ALDH3B2	0	0	6.71713e-06	1.49498e-06	1	0	0	1	0	0	1.26898	0.00488731	0.985379
CTSE	0	0	6.10395e-06	1.7201e-06	1	0	0	1	0	0	1.26824	0.00488446	0.985387
DBT	0	0	5.23727e-06	2.03702e-06	1	0	0	1	0	0	1.26725	0.00488069	0.985395
ZNF695	0	0	4.80479e-06	2.1887e-06	1	0	0	1	0	0	1.267	0.00487972	0.985403
DKK3	0	0	6.56182e-06	1.6126e-06	1	0	0	1	0	0	1.26665	0.00487837	0.985411
DGKZ	0	0	2.76416e-05	7.07079e-06	1	0	0	0	0	0	1.26555	0.00487415	0.985419
SIGLEC7	0	0	5.9058e-06	1.87098e-06	1	0	0	1	0	0	1.26524	0.00487298	0.985427
TCP11	0	0	5.54981e-06	2.00728e-06	1	0	0	1	0	0	1.26462	0.00487061	0.985435
HSPBAP1	0	0	5.02259e-06	2.21029e-06	1	0	0	1	0	0	1.26367	0.00486697	0.985443
TERF2IP	0	0	7.06233e-06	1.53897e-06	1	0	0	1	0	0	1.26338	0.00486582	0.98545
ZNF256	0	0	5.18665e-06	2.18289e-06	1	0	0	1	0	0	1.26271	0.00486327	0.985458
AK8	0	0	5.89705e-06	1.9629e-06	1	0	0	1	0	0	1.26211	0.00486097	0.985466
ARHGEF40	0	0	2.65001e-05	7.54411e-06	1	0	0	0	0	0	1.26191	0.00486021	0.985474
ZNF878	0	0	5.819e-06	1.99668e-06	1	0	0	1	0	0	1.26184	0.00485992	0.985482
VAT1L	0	0	6.90297e-06	1.68359e-06	1	0	0	1	0	0	1.26015	0.00485346	0.985489
PYROXD2	0	0	4.29756e-06	2.55373e-06	1	0	0	1	0	0	1.26013	0.00485338	0.985497
DSEL	0	0	1.26252e-05	4.56118e-06	0	1	0	0	0	0	1.26012	0.00485334	0.985505
UGDH	0	0	6.36052e-06	1.8749e-06	1	0	0	1	0	0	1.25977	0.00485201	0.985513
SLC7A9	0	0	6.38793e-06	1.89819e-06	1	0	0	1	0	0	1.25863	0.00484765	0.98552
UGT2A3	0	0	5.45777e-06	2.29256e-06	1	0	0	1	0	0	1.25569	0.00483636	0.985528
KDM4D	0	0	6.88596e-06	1.83006e-06	1	0	0	1	0	0	1.25521	0.00483454	0.985536
CCSER1	0	0	1.04621e-05	3.68991e-06	0	1	1	0	0	1	1.25404	0.00483004	0.985544
UTP18	0	0	5.74533e-06	2.29183e-06	1	0	0	1	0	0	1.25236	0.0048236	0.985551
DPH1	0	0	6.31814e-06	2.14323e-06	1	0	0	1	0	0	1.25088	0.00481793	0.985559
NFE2L3	0	0	5.72671e-06	2.35737e-06	1	0	0	1	0	0	1.25029	0.00481568	0.985567
SUSD5	0	0	6.72849e-06	2.0256e-06	1	0	0	1	0	0	1.25022	0.00481539	0.985575
ATCAY	0	0	8.0886e-06	1.58702e-06	1	0	0	1	0	0	1.24975	0.00481359	0.985582
ZNF551	0	0	5.57186e-06	2.43163e-06	1	0	0	1	0	0	1.24951	0.00481267	0.98559
KCNAB3	0	0	5.29383e-06	2.52815e-06	1	0	0	1	0	0	1.24938	0.00481218	0.985598
IGSF10	0	0	2.46026e-05	8.52389e-06	1	0	0	0	0	0	1.24933	0.004812	0.985605
CFHR5	0	0	5.27437e-06	2.54715e-06	1	0	0	1	0	0	1.24895	0.00481052	0.985613
BTN2A1	0	0	6.82418e-06	2.03697e-06	1	0	0	1	0	0	1.24871	0.00480962	0.98562
BBS4	0	0	5.76446e-06	2.39251e-06	1	0	0	1	0	0	1.24863	0.00480931	0.985628
PCBP3	0	0	7.76622e-06	1.80046e-06	1	0	0	1	0	0	1.24605	0.0047994	0.985636
HABP2	0	0	6.32076e-06	2.28738e-06	1	0	0	1	0	0	1.24584	0.0047986	0.985643
BCS1L	0	0	6.24487e-06	2.36161e-06	1	0	0	1	0	0	1.24414	0.0047921	0.985651
MFSD10	0	0	7.93915e-06	1.86731e-06	1	0	0	1	0	0	1.24174	0.00478288	0.985658
ZNF549	0	0	6.3685e-06	2.41322e-06	1	0	0	1	0	0	1.24093	0.00477979	0.985666
ZNF106	0	0	2.45915e-05	8.77356e-06	1	0	0	0	0	0	1.24091	0.0047797	0.985673
VRK3	0	0	7.0014e-06	2.21345e-06	1	0	0	1	0	0	1.24055	0.00477832	0.985681
NEK3	0	0	6.28342e-06	2.45847e-06	1	0	0	1	0	0	1.24035	0.00477755	0.985689
LGALS3BP	0	0	7.20487e-06	2.16963e-06	1	0	0	1	0	0	1.23972	0.00477516	0.985696
GIGYF2	0	0	2.67925e-05	8.11023e-06	1	0	0	0	0	0	1.23915	0.00477295	0.985704
CASP10	0	0	6.80066e-06	2.33264e-06	1	0	0	1	0	0	1.23874	0.00477139	0.985711
TANC1	0	0	2.95227e-05	7.25096e-06	1	0	0	0	0	0	1.2384	0.00477008	0.985719
ARSG	0	0	7.71207e-06	2.04372e-06	1	0	0	1	0	0	1.23825	0.0047695	0.985726
USP30	0	0	6.8094e-06	2.37857e-06	1	0	0	1	0	0	1.23706	0.00476494	0.985734
ZNF600	0	0	7.55592e-06	2.16712e-06	1	0	0	1	0	0	1.23578	0.00476006	0.985741
LIMD1	0	0	6.28528e-06	2.59349e-06	1	0	0	1	0	0	1.23567	0.00475963	0.985749
ZNF528	0	0	6.79678e-06	2.43662e-06	1	0	0	1	0	0	1.2352	0.00475783	0.985756
TINAG	0	0	6.47775e-06	2.57642e-06	1	0	0	1	0	0	1.23405	0.00475342	0.985763
CTSF	0	0	7.5476e-06	2.30547e-06	1	0	0	1	0	0	1.23112	0.0047422	0.985771
SPAG4	0	0	8.07621e-06	2.13246e-06	1	0	0	1	0	0	1.23103	0.00474185	0.985778
GP6	0	0	6.19352e-06	2.76677e-06	1	0	0	1	0	0	1.23078	0.00474086	0.985786
ZNF433	0	0	6.94664e-06	2.56211e-06	1	0	0	1	0	0	1.22919	0.00473477	0.985793
DDX52	0	0	6.24328e-06	2.80273e-06	1	0	0	1	0	0	1.22898	0.00473397	0.9858
C2CD3	0	0	2.27253e-05	9.73688e-06	1	0	0	0	0	0	1.2289	0.00473369	0.985808
MKNK1	0	0	8.00476e-06	2.22802e-06	1	0	0	1	0	0	1.22857	0.00473242	0.985815
CKMT2	0	0	8.34406e-06	2.12467e-06	1	0	0	1	0	0	1.22825	0.00473119	0.985823
OXA1L	0	0	7.93424e-06	2.2774e-06	1	0	0	1	0	0	1.22768	0.00472901	0.98583
DUS2	0	0	6.52676e-06	2.7841e-06	1	0	0	1	0	0	1.22638	0.00472402	0.985837
SLC8A1	0	0	1.91693e-05	3.56457e-06	0	0	1	0	0	0	1.22636	0.00472393	0.985845
SLC2A7	0	0	8.4186e-06	2.15572e-06	1	0	0	1	0	0	1.22635	0.00472388	0.985852
ZNF28	0	0	7.74232e-06	2.38193e-06	1	0	0	1	0	0	1.22629	0.00472368	0.985859
TGFB1I1	0	0	8.78344e-06	2.078e-06	1	0	0	1	0	0	1.22487	0.00471821	0.985867
ANKRD53	0	0	8.43431e-06	2.20269e-06	1	0	0	1	0	0	1.22456	0.00471705	0.985874
SESN1	0	0	8.08475e-06	2.3232e-06	1	0	0	1	0	0	1.22441	0.00471647	0.985881
ZNF544	0	0	6.75252e-06	2.79255e-06	1	0	0	1	0	0	1.22353	0.00471308	0.985888
NDC80	0	0	5.70138e-06	3.14692e-06	1	0	0	1	0	0	1.22341	0.00471263	0.985896
UPF3A	0	0	8.13696e-06	2.34982e-06	1	0	0	1	0	0	1.22292	0.00471073	0.985903
HPSE	0	0	7.98359e-06	2.43931e-06	1	0	0	1	0	0	1.2216	0.0047057	0.98591
ZP1	0	0	6.45257e-06	2.97678e-06	1	0	0	1	0	0	1.22067	0.00470211	0.985917
NUDCD1	0	0	7.35388e-06	2.69436e-06	1	0	0	1	0	0	1.22006	0.00469976	0.985925
RIMS2	0	0	2.87379e-05	8.06071e-06	1	0	0	0	0	0	1.21954	0.00469777	0.985932
ARHGAP28	0	0	7.21461e-06	2.7587e-06	1	0	0	1	0	0	1.21945	0.00469743	0.985939
GSTCD	0	0	7.54074e-06	2.73928e-06	1	0	0	1	0	0	1.21642	0.00468584	0.985946
KIDINS220	0	0	3.14449e-05	7.29465e-06	1	0	0	0	0	0	1.21603	0.00468433	0.985953
TRMT44	0	0	6.15568e-06	3.223e-06	1	0	0	1	0	0	1.21569	0.00468301	0.985961
FSHR	0	0	9.37024e-06	2.34846e-06	0	4	0	0	3	0	1.21436	0.00467793	0.985968
FAM161B	0	0	7.17319e-06	2.97802e-06	1	0	0	1	0	0	1.21249	0.00467077	0.985975
EFS	0	0	1.01498e-05	2.01575e-06	1	0	0	1	0	0	1.21162	0.00466743	0.985982
ARHGAP10	0	0	1.26268e-05	3.9661e-06	0	2	0	0	1	0	1.21017	0.00466186	0.985989
NUP214	0	0	2.94322e-05	8.12715e-06	1	0	0	0	0	0	1.20982	0.00466054	0.985996
ZNF14	0	0	7.22712e-06	3.0424e-06	1	0	0	1	0	0	1.20972	0.00466014	0.986004
MTUS2	0	0	1.61868e-05	4.86922e-06	0	1	0	0	0	0	1.2094	0.00465891	0.986011
C15orf52	0	0	8.7786e-06	2.57707e-06	1	0	0	1	0	0	1.20802	0.0046536	0.986018
KIAA0368	0	0	2.11951e-05	1.0876e-05	1	0	0	0	0	0	1.20764	0.00465217	0.986025
PGLYRP2	0	0	9.78161e-06	2.26775e-06	1	0	0	1	0	0	1.20724	0.00465061	0.986032
CBX2	0	0	1.00403e-05	2.20379e-06	1	0	0	1	0	0	1.20651	0.00464782	0.986039
ZFPM1	0	0	2.11942e-05	3.50383e-06	0	0	1	0	0	0	1.20616	0.0046465	0.986046
ZNF365	0	0	8.05246e-06	2.8802e-06	1	0	0	1	0	0	1.20594	0.00464563	0.986053
TCTN2	0	0	7.00707e-06	3.27703e-06	1	0	0	1	0	0	1.20431	0.00463939	0.98606
FBXO40	0	0	9.30617e-06	2.51334e-06	1	0	0	1	0	0	1.20428	0.00463927	0.986067
ABCG2	0	0	7.45354e-06	3.13403e-06	1	0	0	1	0	0	1.20411	0.00463864	0.986074
GPR107	0	0	8.60519e-06	2.76079e-06	1	0	0	1	0	0	1.20378	0.00463737	0.986082
WRAP53	0	0	8.56417e-06	2.80743e-06	1	0	0	1	0	0	1.20268	0.00463313	0.986089
ADCY2	0	0	1.8505e-05	4.53049e-06	0	0	1	0	0	0	1.20113	0.00462718	0.986096
C10orf90	0	0	9.49386e-06	2.5555e-06	1	0	0	1	0	0	1.20079	0.00462588	0.986103
HMMR	0	0	7.01206e-06	3.39154e-06	1	0	0	1	0	0	1.20043	0.0046245	0.98611
PANK1	0	0	9.95101e-06	2.42948e-06	1	0	0	1	0	0	1.19994	0.00462262	0.986117
MCTP2	0	0	1.26205e-05	4.20362e-06	0	0	2	0	0	1	1.19918	0.00461971	0.986124
FRMD3	0	0	8.67947e-06	2.87597e-06	1	0	0	1	0	0	1.19911	0.00461944	0.986131
CPAMD8	0	0	3.10242e-05	9.16034e-06	2	0	0	2	0	0	1.19836	0.00461658	0.986138
NOLC1	0	0	8.45404e-06	2.9839e-06	1	0	0	1	0	0	1.19801	0.00461522	0.986144
PREX1	0	0	3.37041e-05	7.14805e-06	1	0	0	0	0	0	1.19687	0.00461086	0.986151
DHX32	0	0	9.20344e-06	2.82671e-06	1	0	0	1	0	0	1.19496	0.00460352	0.986158
MTMR7	0	0	8.53717e-06	3.06604e-06	1	0	0	1	0	0	1.19436	0.00460122	0.986165
PCCB	0	0	1.0279e-05	2.5524e-06	1	0	0	1	0	0	1.19223	0.00459306	0.986172
BNC2	0	0	2.01515e-05	4.09806e-06	0	1	0	0	0	0	1.1919	0.00459182	0.986179
ANKEF1	0	0	9.31275e-06	2.91672e-06	1	0	0	1	0	0	1.19077	0.00458745	0.986186
SLC15A2	0	0	8.12476e-06	3.39315e-06	1	0	0	1	0	0	1.18807	0.0045771	0.986193
ABCA1	0	0	2.5676e-05	1.00093e-05	1	0	0	0	0	0	1.18791	0.00457652	0.9862
FANCI	0	0	1.49351e-05	5.93735e-06	0	1	0	0	0	0	1.18764	0.00457548	0.986207
ZNF546	0	0	8.52352e-06	3.28679e-06	1	0	0	1	0	0	1.1872	0.00457377	0.986214
NPBWR1	0	0	1.03833e-05	9.324e-07	1	0	1	1	0	1	1.18666	0.00457171	0.986221
MEFV	0	0	9.08391e-06	3.13325e-06	1	0	0	1	0	0	1.18612	0.00456964	0.986227
COL5A3	0	0	2.98721e-05	8.76558e-06	1	0	0	0	0	0	1.18413	0.004562	0.986234
SLC4A1AP	0	0	8.9469e-06	3.26972e-06	1	0	0	1	0	0	1.18312	0.00455815	0.986241
ZNF226	0	0	9.33338e-06	3.19429e-06	1	0	0	1	0	0	1.18138	0.00455148	0.986248
SP110	0	0	8.02493e-06	3.72731e-06	1	0	0	1	0	0	1.17818	0.00453917	0.986255
GLB1L	0	0	1.01788e-05	3.04853e-06	1	0	0	1	0	0	1.17697	0.00453455	0.986262
RINT1	0	0	8.42146e-06	3.77127e-06	1	0	0	1	0	0	1.17243	0.00451714	0.986269
NLRP13	0	0	7.95735e-06	3.97323e-06	1	0	0	1	0	0	1.17089	0.00451123	0.986275
CHRNE	0	0	1.27223e-05	2.43348e-06	1	0	0	1	0	0	1.16962	0.00450637	0.986282
CEP85	0	0	9.57411e-06	3.49249e-06	1	0	0	1	0	0	1.16903	0.00450411	0.986289
TGFBRAP1	0	0	1.03314e-05	3.25641e-06	1	0	0	1	0	0	1.16854	0.00450223	0.986296
DSC3	0	0	9.9593e-06	3.41764e-06	1	0	0	1	0	0	1.16732	0.00449752	0.986303
DIP2A	0	0	3.8281e-05	6.62614e-06	1	0	0	0	0	0	1.16651	0.00449441	0.986309
TBC1D5	0	0	8.66694e-06	3.97017e-06	1	0	0	1	0	0	1.16333	0.00448224	0.986316
MON1B	0	0	1.37614e-05	2.30247e-06	1	0	0	1	0	0	1.16278	0.00448013	0.986323
CYLC2	0	0	3.22029e-06	1.21723e-06	1	0	0	0	0	1	1.16263	0.00447955	0.98633
DCTD	0	0	3.09254e-06	7.99025e-07	0	0	1	1	0	0	1.1605	0.00447136	0.986337
ANKLE1	0	0	1.29706e-05	2.65221e-06	1	0	0	1	0	0	1.15988	0.004469	0.986343
SSH3	0	0	1.13231e-05	3.19896e-06	1	0	0	1	0	0	1.15978	0.00446862	0.98635
TAS2R41	0	0	2.15256e-06	1.14253e-06	0	0	1	1	0	0	1.15957	0.0044678	0.986357
SEMA3E	0	0	9.76063e-06	3.7241e-06	1	0	0	1	0	0	1.15954	0.0044677	0.986364
PRSS58	0	0	2.68668e-06	9.92192e-07	0	0	1	1	0	0	1.15864	0.00446424	0.98637
EML5	0	0	3.02017e-05	9.46385e-06	1	0	0	0	0	0	1.15824	0.00446269	0.986377
CHAT	0	0	1.11709e-05	3.30032e-06	1	0	0	1	0	0	1.15814	0.00446231	0.986384
CCDC66	0	0	7.66679e-06	4.46943e-06	1	0	0	1	0	0	1.15799	0.00446176	0.986391
TGM3	0	0	1.22821e-05	3.0184e-06	1	0	0	1	0	0	1.1554	0.0044518	0.986397
METTL13	0	0	1.18788e-05	3.17987e-06	1	0	0	1	0	0	1.15449	0.00444831	0.986404
HDAC9	0	0	1.8935e-05	5.6597e-06	0	1	0	0	0	0	1.15406	0.00444667	0.986411
SEMA3C	0	0	1.12892e-05	3.47181e-06	1	0	0	1	0	0	1.15138	0.00443638	0.986417
MAN1B1	0	0	1.36549e-05	2.76529e-06	1	0	0	1	0	0	1.14902	0.00442732	0.986424
DLG2	0	0	1.98849e-05	5.75758e-06	0	2	0	2	0	0	1.1483	0.00442457	0.986431
MYLK	0	0	3.6199e-05	7.85895e-06	1	0	0	0	0	0	1.14822	0.00442426	0.986437
TRMT1	0	0	1.24984e-05	3.20447e-06	1	0	0	1	0	0	1.14716	0.00442019	0.986444
DDX10	0	0	1.08757e-05	3.84618e-06	1	0	0	1	0	0	1.14381	0.00440735	0.986451
COL27A1	0	0	3.371e-05	8.81135e-06	1	0	0	0	0	0	1.14322	0.00440509	0.986457
ARHGAP11A	0	0	1.08478e-05	3.96113e-06	1	0	0	1	0	0	1.14046	0.00439449	0.986464
MAGEF1	0	0	3.72547e-06	1.06076e-06	0	1	0	1	0	0	1.13977	0.00439184	0.986471
NEK4	0	0	1.00534e-05	4.25302e-06	1	0	0	1	0	0	1.13956	0.00439106	0.986477
PDE6A	0	0	1.1321e-05	3.87688e-06	1	0	0	1	0	0	1.13816	0.00438569	0.986484
DDX58	0	0	1.07365e-05	4.08678e-06	1	0	0	1	0	0	1.13765	0.00438373	0.98649
GANC	0	0	9.11635e-06	4.77473e-06	1	0	0	1	0	0	1.13295	0.00436568	0.986497
MANBA	0	0	1.16131e-05	3.94693e-06	1	0	0	1	0	0	1.13291	0.00436553	0.986504
ANKAR	0	0	6.71008e-06	5.62894e-06	1	0	0	1	0	0	1.13138	0.00435967	0.98651
RAD54L	0	0	1.26161e-05	3.6684e-06	1	0	0	1	0	0	1.13124	0.00435913	0.986517
KLC1	0	0	1.44953e-05	3.1208e-06	1	0	0	1	0	0	1.129	0.00435055	0.986523
ASAH1	0	0	4.51165e-06	2.18441e-06	1	0	0	0	1	0	1.12642	0.00434063	0.98653
LUZP2	0	0	3.52087e-06	1.73008e-06	0	0	1	1	0	0	1.12622	0.00433986	0.986537
DSC1	0	0	1.23962e-05	3.94155e-06	1	0	0	1	0	0	1.12496	0.00433503	0.986543
MYCBPAP	0	0	1.15157e-05	4.24296e-06	1	0	0	1	0	0	1.12464	0.00433382	0.98655
CCDC80	0	0	1.39504e-05	3.53205e-06	1	0	0	1	0	0	1.12174	0.0043227	0.986556
STAT2	0	0	1.16181e-05	4.31911e-06	1	0	0	1	0	0	1.12122	0.00432067	0.986563
GNA14	0	0	5.79512e-06	1.65926e-06	1	0	0	0	0	1	1.12116	0.00432045	0.986569
PIGQ	0	0	1.54029e-05	3.09616e-06	1	0	0	1	0	0	1.12046	0.00431775	0.986576
SH3PXD2B	0	0	1.37092e-05	3.75176e-06	1	0	0	1	0	0	1.11738	0.00430596	0.986583
HSPH1	0	0	1.26497e-05	4.14414e-06	1	0	0	1	0	0	1.11606	0.00430087	0.986589
PCDHGA3	0	0	1.58277e-05	3.11733e-06	1	0	0	1	0	0	1.11547	0.00429862	0.986596
IMPG2	0	0	1.03298e-05	4.96835e-06	1	0	0	1	0	0	1.11435	0.00429431	0.986602
PRG4	0	0	1.25314e-05	4.24326e-06	1	0	0	1	0	0	1.1142	0.00429374	0.986609
ZNF208	0	0	1.25424e-05	4.27113e-06	1	0	0	1	0	0	1.11323	0.00429001	0.986615
ERBB4	0	0	2.21904e-05	6.08348e-06	0	0	1	0	0	0	1.11291	0.00428882	0.986622
VPS13B	0	0	5.66398e-05	1.68781e-05	2	0	0	1	0	0	1.11284	0.00428855	0.986628
POMGNT1	0	0	1.3683e-05	3.91318e-06	1	0	0	1	0	0	1.11265	0.00428781	0.986635
PMS2	0	0	1.37344e-05	3.90082e-06	1	0	0	1	0	0	1.11251	0.00428727	0.986641
MYH10	0	0	3.48164e-05	9.46759e-06	1	0	0	0	0	0	1.11192	0.00428501	0.986648
CCSER2	0	0	1.26008e-05	4.34934e-06	1	0	0	1	0	0	1.11022	0.00427847	0.986654
GRAP2	0	0	6.18136e-06	1.89728e-06	1	0	0	0	0	1	1.10976	0.00427669	0.98666
MARK3	0	0	1.44063e-05	3.77154e-06	1	0	0	1	0	0	1.10967	0.00427638	0.986667
ERICH1	0	0	5.37669e-06	1.6866e-06	0	0	1	1	0	0	1.10825	0.00427092	0.986673
CASQ2	0	0	5.45883e-06	1.67919e-06	0	0	1	1	0	0	1.10763	0.00426855	0.98668
DOCK10	0	0	3.41597e-05	9.90067e-06	1	0	0	0	0	0	1.10514	0.004259	0.986686
MYT1L	0	0	2.64923e-05	4.96989e-06	0	0	1	0	0	0	1.10434	0.00425592	0.986693
ABCC4	0	0	1.64244e-05	5.946e-06	0	0	2	0	0	1	1.10366	0.00425329	0.986699
RANBP17	0	0	1.16219e-05	4.88769e-06	1	0	0	1	0	0	1.10364	0.00425324	0.986705
PLEKHB1	0	0	7.30043e-06	1.20275e-06	0	0	1	1	0	0	1.10343	0.0042524	0.986712
BCKDHB	0	0	5.52171e-06	1.84521e-06	0	0	1	1	0	0	1.10187	0.00424644	0.986718
LEPR	0	0	1.20744e-05	4.84494e-06	1	0	0	1	0	0	1.10037	0.00424068	0.986725
TANGO6	0	0	1.32686e-05	4.47896e-06	1	0	0	1	0	0	1.09949	0.00423728	0.986731
ZSCAN20	0	0	1.4778e-05	4.02523e-06	1	0	0	1	0	0	1.09815	0.00423216	0.986737
ZRANB3	0	0	1.24047e-05	4.82783e-06	1	0	0	1	0	0	1.09756	0.00422989	0.986744
SLC9C1	0	0	1.2415e-05	4.85705e-06	1	0	0	1	0	0	1.09657	0.00422609	0.98675
MICU1	0	0	5.66693e-06	2.50835e-06	1	0	0	0	0	1	1.09625	0.00422488	0.986756
PWP2	0	0	1.54638e-05	3.96564e-06	1	0	0	1	0	0	1.09311	0.00421281	0.986763
SGSM1	0	0	2.71597e-05	5.12709e-06	0	0	1	0	0	0	1.09302	0.00421247	0.986769
RGL3	0	0	1.5985e-05	3.80982e-06	1	0	0	1	0	0	1.09264	0.00421103	0.986775
INTS8	0	0	1.29866e-05	4.80279e-06	1	0	0	1	0	0	1.09248	0.00421039	0.986782
TBC1D31	0	0	1.20382e-05	5.12065e-06	1	0	0	1	0	0	1.09236	0.00420994	0.986788
SLC4A9	0	0	1.58272e-05	3.89588e-06	1	0	0	1	0	0	1.09161	0.00420704	0.986794
MYOM2	0	0	2.22427e-05	6.34093e-06	1	2	0	2	1	0	1.09155	0.00420683	0.986801
CMTR2	0	0	6.64847e-06	2.38484e-06	1	0	0	0	0	1	1.09005	0.00420106	0.986807
GLI1	0	0	1.5285e-05	4.15242e-06	1	0	0	1	0	0	1.08923	0.00419793	0.986813
TCIRG1	0	0	1.70311e-05	3.67214e-06	1	0	0	1	0	0	1.08644	0.00418722	0.98682
ITGA1	0	0	1.21437e-05	5.39463e-06	1	0	0	1	0	0	1.08306	0.00417423	0.986826
TEP1	0	0	3.62354e-05	1.12464e-05	2	0	0	2	0	0	1.081	0.00416634	0.986832
ZPLD1	0	0	6.32371e-06	2.09879e-06	0	1	0	1	0	0	1.08079	0.00416552	0.986838
MLYCD	0	0	1.00088e-05	1.84183e-06	1	0	0	0	1	0	1.08074	0.00416535	0.986845
ANKRD27	0	0	1.44126e-05	4.73645e-06	1	0	0	1	0	0	1.0803	0.00416366	0.986851
PLD2	0	0	1.57242e-05	4.37785e-06	1	0	0	1	0	0	1.07811	0.00415527	0.986857
INPP5J	0	0	1.67209e-05	4.1238e-06	1	0	0	1	0	0	1.07593	0.00414689	0.986863
SASH1	0	0	2.1597e-05	5.18414e-06	0	0	2	0	0	1	1.0756	0.0041456	0.98687
LIG3	0	0	1.51622e-05	4.65649e-06	1	0	0	1	0	0	1.07531	0.00414451	0.986876
ALPK1	0	0	1.48199e-05	4.79869e-06	1	0	0	1	0	0	1.07443	0.00414114	0.986882
CTNND2	0	0	2.7807e-05	5.67378e-06	0	0	1	0	0	0	1.07042	0.00412571	0.986888
ECE2	0	0	2.11182e-05	4.76536e-06	2	0	0	3	0	0	1.07036	0.00412551	0.986895
PLA2G6	0	0	1.95146e-05	3.42556e-06	1	0	0	1	0	0	1.06955	0.00412239	0.986901
PKN3	0	0	1.74293e-05	4.1843e-06	1	0	0	1	0	0	1.06723	0.0041135	0.986907
MBTPS1	0	0	1.58229e-05	4.73855e-06	1	0	0	1	0	0	1.06643	0.00411041	0.986913
GALNT13	0	0	7.29995e-06	2.48427e-06	0	0	1	1	0	0	1.06471	0.00410381	0.98692
TMEM232	0	0	5.54483e-06	2.90293e-06	0	1	0	1	0	0	1.06454	0.00410315	0.986926
FBN3	1	0	5.16531e-05	1.28135e-05	0	0	0	2	1	0	1.06417	0.00410173	0.986932
TTLL4	0	0	1.45781e-05	5.28785e-06	1	0	0	1	0	0	1.06232	0.00409463	0.986938
NEMF	0	0	1.31878e-05	5.77478e-06	1	0	0	1	0	0	1.06151	0.00409154	0.986944
TRIM37	0	0	1.52744e-05	5.09742e-06	1	0	0	1	0	0	1.06117	0.00409022	0.98695
KCNMA1	0	0	2.84944e-05	5.79479e-06	0	0	1	0	0	0	1.06034	0.00408702	0.986957
CPZ	0	0	1.39084e-05	2.48316e-06	1	1	0	3	0	0	1.05951	0.00408386	0.986963
ATM	1	0	3.00031e-05	1.41071e-05	0	0	0	6	0	0	1.05946	0.00408368	0.986969
THSD7A	0	0	1.92629e-05	8.69483e-06	0	1	0	0	0	0	1.05823	0.00407894	0.986975
HEATR6	0	0	1.52757e-05	5.20037e-06	1	0	0	1	0	0	1.05814	0.00407858	0.986981
DDX54	0	0	1.76688e-05	4.44526e-06	1	0	0	1	0	0	1.05724	0.00407512	0.986987
AHI1	0	0	1.37496e-05	5.75371e-06	1	0	0	1	0	0	1.05668	0.004073	0.986994
CD163	0	0	1.7342e-05	4.6646e-06	1	0	0	1	0	0	1.05395	0.0040625	0.987
ZFYVE16	0	0	1.36057e-05	5.89566e-06	1	0	0	1	0	0	1.05393	0.00406243	0.987006
NRP1	0	0	1.90228e-05	4.13844e-06	1	0	0	1	0	0	1.05326	0.00405987	0.987012
RNF20	0	0	1.58073e-05	5.25324e-06	1	0	0	1	0	0	1.05148	0.00405303	0.987018
SP140L	0	0	5.91194e-06	2.86795e-06	0	0	2	0	2	0	1.05008	0.00404765	0.987024
MCPH1	0	0	1.06789e-05	3.26497e-06	2	0	0	1	0	2	1.04637	0.0040334	0.98703
NFX1	0	0	1.61753e-05	5.3148e-06	1	0	0	1	0	0	1.04618	0.00403267	0.987036
ARSB	0	0	9.3048e-06	2.50355e-06	0	0	1	1	0	0	1.04459	0.00402658	0.987042
ACAD10	0	0	1.75254e-05	4.99913e-06	1	0	0	1	0	0	1.04249	0.0040185	0.987048
USP42	0	0	1.82659e-05	4.80771e-06	1	0	0	1	0	0	1.04101	0.00401283	0.987055
PAN2	0	0	1.71078e-05	5.20365e-06	1	0	0	1	0	0	1.04054	0.00401101	0.987061
TGS1	0	0	7.33962e-06	3.34545e-06	0	0	1	1	0	0	1.03913	0.0040056	0.987067
A2ML1	0	0	1.36782e-05	6.39022e-06	1	0	0	1	0	0	1.03893	0.00400485	0.987073
MICAL3	0	0	4.2266e-05	9.58851e-06	1	0	0	0	0	0	1.03854	0.00400335	0.987079
ATP2A1	0	0	1.92641e-05	4.61482e-06	1	0	0	1	0	0	1.03717	0.00399809	0.987085
IMPG1	0	0	6.29374e-06	3.62689e-06	0	1	0	1	0	0	1.0361	0.00399396	0.987091
RPGRIP1	0	0	1.48738e-05	6.1005e-06	1	0	0	1	0	0	1.0359	0.00399322	0.987097
NAV3	0	0	4.1707e-05	9.90032e-06	1	0	0	0	0	0	1.03469	0.00398856	0.987103
SHROOM3	0	0	2.6396e-05	7.21024e-06	0	1	0	0	0	0	1.03394	0.00398569	0.987109
NOTCH2	0	0	4.24632e-05	9.7116e-06	1	0	0	0	0	0	1.03327	0.00398312	0.987115
UBE3B	0	0	1.76694e-05	5.36104e-06	1	0	0	1	0	0	1.03074	0.0039734	0.987121
MTR	0	0	1.74818e-05	5.49768e-06	1	0	0	1	0	0	1.0286	0.00396519	0.987127
SBF2	0	0	2.39154e-05	8.35195e-06	0	1	0	0	0	0	1.02441	0.00394909	0.987133
ABCB11	0	0	1.75883e-05	5.64662e-06	1	0	0	1	0	0	1.02338	0.00394514	0.987139
RP1	0	0	1.45508e-05	6.66179e-06	1	0	0	1	0	0	1.02298	0.00394359	0.987145
ZFP64	0	0	2.37013e-05	3.72236e-06	1	0	0	1	0	0	1.0215	0.00393793	0.987151
ABCC11	0	0	1.79794e-05	5.67904e-06	1	0	0	1	0	0	1.01884	0.00392771	0.987157
BARD1	0	0	9.84966e-06	3.08517e-06	0	1	0	1	0	0	1.01777	0.0039236	0.987163
EXPH5	0	0	1.43619e-05	6.94306e-06	1	0	0	1	0	0	1.01682	0.00391994	0.987169
C2CD5	0	0	1.97187e-05	5.19192e-06	1	0	0	1	0	0	1.01653	0.00391883	0.987175
PLEKHG4	0	0	1.87845e-05	5.54662e-06	1	0	0	1	0	0	1.01514	0.00391351	0.987181
MYO1G	0	0	2.11181e-05	4.81067e-06	1	0	0	1	0	0	1.01442	0.00391074	0.987187
FRMPD1	0	0	1.77422e-05	5.95293e-06	1	0	0	1	0	0	1.01333	0.00390655	0.987193
ATP8A2	0	0	1.81477e-05	5.84563e-06	1	0	0	1	0	0	1.01261	0.00390378	0.987199
PTPRT	0	0	2.95392e-05	6.99502e-06	0	1	0	0	0	0	1.01141	0.00389918	0.987205
MAP4K4	0	0	3.05087e-05	6.72885e-06	0	1	0	0	0	0	1.01015	0.00389435	0.987211
MYO18A	0	0	4.78928e-05	8.94517e-06	1	0	0	0	0	0	1.00706	0.00388246	0.987217
CEP85L	0	0	9.74469e-06	3.74274e-06	0	0	1	1	0	0	1.00513	0.00387504	0.987223
LZTR1	0	0	2.53398e-05	3.79761e-06	1	0	0	1	0	0	1.00452	0.00387271	0.987229
ATAD5	0	0	1.60715e-05	7.10909e-06	1	0	0	1	0	0	0.996507	0.00384194	0.987235
OLFML2B	0	0	1.26516e-05	3.10465e-06	0	0	1	1	0	0	0.996123	0.00384047	0.987241
TJP3	0	0	2.35686e-05	4.68028e-06	1	0	0	1	0	0	0.995897	0.0038396	0.987247
TNKS	0	0	2.17005e-05	5.33733e-06	1	0	0	1	0	0	0.994498	0.00383423	0.987253
MAGI1	0	0	3.13123e-05	7.257e-06	0	0	1	0	0	0	0.993243	0.00382941	0.987258
MYPN	0	0	2.1499e-05	5.48481e-06	1	0	0	1	0	0	0.992247	0.00382558	0.987264
PLOD2	0	0	1.12896e-05	3.70326e-06	0	0	1	1	0	0	0.992017	0.0038247	0.98727
OR7G3	0	0	2.63576e-06	7.79884e-07	1	0	0	2	0	0	0.991962	0.00382449	0.987276
CD83	0	0	2.04195e-06	9.89976e-07	1	0	0	2	0	0	0.991655	0.00382331	0.987282
OR5M10	0	0	2.55552e-06	8.30697e-07	1	0	0	2	0	0	0.991299	0.00382194	0.987288
DGKB	0	0	1.26964e-05	4.0761e-06	1	0	0	0	1	0	0.990844	0.00382019	0.987294
XIRP1	0	0	1.97715e-05	6.19749e-06	1	0	0	1	0	0	0.988169	0.00380992	0.9873
SPATA31A7	0	0	9.72194e-08	4.05926e-08	0	0	0	0	0	0	0.986546	0.00380368	0.987306
SPATA31A6	0	0	2.34146e-07	3.87191e-08	0	0	0	0	0	0	0.985328	0.00379901	0.987312
LLGL2	0	0	2.52448e-05	4.55925e-06	1	0	0	1	0	0	0.98435	0.00379525	0.987317
SKIV2L	0	0	2.22422e-05	5.57409e-06	1	0	0	1	0	0	0.983197	0.00379082	0.987323
KRTAP20-3	0	0	1.79228e-07	1.56048e-07	0	0	0	0	0	0	0.982607	0.00378855	0.987329
HMHB1	0	0	1.44644e-07	1.82342e-07	0	0	0	0	0	0	0.982204	0.00378701	0.987335
KRTAP22-1	0	0	1.98739e-07	1.84454e-07	0	0	0	0	0	0	0.981647	0.00378487	0.987341
SLN	0	0	4.87463e-07	9.14372e-08	0	0	0	0	0	0	0.981537	0.00378445	0.987347
SPHAR	0	0	2.52937e-07	1.77536e-07	0	0	0	0	0	0	0.981337	0.00378367	0.987353
TMSB15A	0	0	2.99281e-07	1.89395e-07	0	0	0	0	0	0	0.980584	0.00378078	0.987358
ZNF714	0	0	2.44937e-07	2.13755e-07	0	0	0	0	0	0	0.980417	0.00378014	0.987364
KRTAP23-1	0	0	2.90567e-07	2.04204e-07	0	0	0	0	0	0	0.980258	0.00377953	0.98737
RPL41	0	0	1.9967e-07	2.43163e-07	0	0	0	0	0	0	0.980028	0.00377865	0.987376
C7orf73	0	0	3.59581e-07	2.16124e-07	0	0	0	0	0	0	0.979296	0.00377584	0.987382
KRTAP19-6	0	0	4.05004e-07	2.07295e-07	0	0	0	0	0	0	0.97912	0.00377516	0.987388
RPL39L	0	0	2.71428e-07	2.53396e-07	0	0	0	0	0	0	0.979087	0.00377503	0.987393
DEFB4A	0	0	3.81625e-07	2.16807e-07	0	0	0	0	0	0	0.979075	0.00377499	0.987399
ZNF787	0	0	6.96849e-07	1.19446e-07	0	0	0	0	0	0	0.978842	0.00377409	0.987405
IFI27	0	0	3.03158e-07	2.54603e-07	0	0	0	0	0	0	0.978762	0.00377379	0.987411
HTN3	0	0	2.70806e-07	2.67382e-07	0	0	0	0	0	0	0.97871	0.00377359	0.987416
GNG5	0	0	3.36497e-07	2.45964e-07	0	0	0	0	0	0	0.978692	0.00377352	0.987422
CD52	0	0	4.68438e-07	2.08923e-07	0	0	0	0	0	0	0.978492	0.00377275	0.987428
IGIP	0	0	6.42586e-07	1.52538e-07	0	0	0	0	0	0	0.978435	0.00377253	0.987434
GEMIN5	0	0	1.95902e-05	6.6174e-06	1	0	0	1	0	0	0.978375	0.0037723	0.987439
DEFB131	0	0	3.93331e-07	2.45954e-07	0	0	0	0	0	0	0.97817	0.00377151	0.987445
TMSB4X	0	0	5.57557e-07	1.90955e-07	0	0	0	0	0	0	0.978165	0.00377149	0.987451
KRTAP20-1	0	0	4.62277e-07	2.23207e-07	0	0	0	0	0	0	0.978158	0.00377147	0.987457
DEFB108B	0	0	4.41312e-07	2.34491e-07	0	0	0	0	0	0	0.978042	0.00377102	0.987462
DEFB106B	0	0	5.17761e-07	2.09802e-07	0	0	0	0	0	0	0.978015	0.00377092	0.987468
RPL39	0	0	1.23673e-07	3.47337e-07	0	0	0	0	0	0	0.977876	0.00377038	0.987474
CTTNBP2	0	0	2.0183e-05	6.44549e-06	1	0	0	1	0	0	0.977778	0.00377	0.987479
TOMM7	0	0	3.22411e-07	2.84416e-07	0	0	0	0	0	0	0.97777	0.00376997	0.987485
SPRR2G	0	0	4.01393e-07	2.73769e-07	0	0	0	0	0	0	0.977335	0.0037683	0.987491
DEFB107B	0	0	5.35937e-07	2.2902e-07	0	0	0	0	0	0	0.977323	0.00376826	0.987496
DEFB134	0	0	4.56297e-07	2.5608e-07	0	0	0	0	0	0	0.977314	0.00376823	0.987502
KRTAP20-2	0	0	5.18613e-07	2.35313e-07	0	0	0	0	0	0	0.97731	0.00376821	0.987508
PRAC1	0	0	3.71157e-07	2.86693e-07	0	0	0	0	0	0	0.97726	0.00376801	0.987513
LCE6A	0	0	3.96925e-07	2.82222e-07	0	0	0	0	0	0	0.977145	0.00376758	0.987519
SPRR2D	0	0	4.93484e-07	2.52064e-07	0	0	0	0	0	0	0.977083	0.00376734	0.987525
SEC61G	0	0	4.53356e-07	2.6755e-07	0	0	0	0	0	0	0.977028	0.00376713	0.98753
KRTAP19-7	0	0	5.57248e-07	2.35257e-07	0	0	0	0	0	0	0.976957	0.00376685	0.987536
LENEP	0	0	4.45063e-07	2.79345e-07	0	0	0	0	0	0	0.976782	0.00376618	0.987541
PPP1R21	0	0	1.17806e-05	4.09868e-06	0	0	1	1	0	0	0.97677	0.00376613	0.987547
HSBP1	0	0	3.11655e-07	3.27053e-07	0	0	0	0	0	0	0.976703	0.00376588	0.987553
HEPN1	0	0	3.95946e-07	3.01352e-07	0	0	0	0	0	0	0.976632	0.0037656	0.987558
CYCS	0	0	2.72274e-07	3.45817e-07	0	0	0	0	0	0	0.976552	0.0037653	0.987564
SPRR2F	0	0	4.89123e-07	2.73e-07	0	0	0	0	0	0	0.976551	0.00376529	0.987569
SCGB2B2	0	0	2.71301e-07	3.47127e-07	0	0	0	0	0	0	0.976526	0.0037652	0.987575
DEC1	0	0	2.95538e-07	3.39906e-07	0	0	0	0	0	0	0.9765	0.0037651	0.98758
DEFB121	0	0	4.88938e-07	2.75306e-07	0	0	0	0	0	0	0.97649	0.00376506	0.987586
RPS27	0	0	1.98008e-07	3.74381e-07	0	0	0	0	0	0	0.976454	0.00376492	0.987591
ATP5E	0	0	4.25195e-07	2.98561e-07	0	0	0	0	0	0	0.97644	0.00376486	0.987597
COX7B2	0	0	5.79587e-07	2.47571e-07	0	0	0	0	0	0	0.976416	0.00376477	0.987603
KRTAP25-1	0	0	4.2085e-07	3.01477e-07	0	0	0	0	0	0	0.9764	0.00376471	0.987608
C2orf15	0	0	6.13833e-07	2.38559e-07	0	0	0	0	0	0	0.976348	0.00376451	0.987614
DEFB1	0	0	6.55734e-07	2.31985e-07	0	0	0	0	0	0	0.976143	0.00376373	0.987619
DEFB114	0	0	6.06118e-07	2.4877e-07	0	0	0	0	0	0	0.97614	0.00376371	0.987625
C8orf59	0	0	5.33818e-07	2.73716e-07	0	0	0	0	0	0	0.976122	0.00376364	0.98763
SFTA2	0	0	5.0806e-07	2.88797e-07	0	0	0	0	0	0	0.975946	0.00376297	0.987636
S100A10	0	0	4.71823e-07	3.01871e-07	0	0	0	0	0	0	0.975922	0.00376288	0.987641
S100A6	0	0	5.04372e-07	2.93973e-07	0	0	0	0	0	0	0.975839	0.00376256	0.987646
SPANXN5	0	0	6.10011e-07	2.61669e-07	0	0	0	0	0	0	0.975752	0.00376222	0.987652
POLR2K	0	0	3.61778e-07	3.46553e-07	0	0	0	0	0	0	0.975711	0.00376207	0.987657
S100G	0	0	5.99476e-07	2.71049e-07	0	0	0	0	0	0	0.975593	0.00376161	0.987663
KRTAP21-1	0	0	6.56009e-07	2.53627e-07	0	0	0	0	0	0	0.97555	0.00376145	0.987668
DIRC1	0	0	5.12996e-07	3.01852e-07	0	0	0	0	0	0	0.975545	0.00376143	0.987674
RPS27L	0	0	2.61329e-07	3.91448e-07	0	0	0	0	0	0	0.975408	0.0037609	0.987679
SPRR4	0	0	4.39562e-07	3.3267e-07	0	0	0	0	0	0	0.975377	0.00376078	0.987685
COX6C	0	0	4.42062e-07	3.34456e-07	0	0	0	0	0	0	0.975306	0.00376051	0.98769
HTN1	0	0	3.53155e-07	3.64902e-07	0	0	0	0	0	0	0.97529	0.00376045	0.987695
DEFB104B	0	0	6.17266e-07	2.77784e-07	0	0	0	0	0	0	0.975246	0.00376028	0.987701
FAM72B	0	0	1.01324e-06	1.47382e-07	0	0	0	0	0	0	0.975177	0.00376002	0.987706
SMR3B	0	0	6.65573e-07	2.6752e-07	0	0	0	0	0	0	0.975083	0.00375966	0.987712
SPANXN1	0	0	6.53657e-07	2.72268e-07	0	0	0	0	0	0	0.975063	0.00375958	0.987717
MT1G	0	0	5.87357e-07	2.9596e-07	0	0	0	0	0	0	0.975024	0.00375943	0.987722
SPRR2B	0	0	6.62616e-07	2.73052e-07	0	0	0	0	0	0	0.97496	0.00375918	0.987728
SUMO4	0	0	3.35713e-07	3.85878e-07	0	0	0	0	0	0	0.974878	0.00375887	0.987733
FCGR1B	0	0	6.34182e-07	2.86022e-07	0	0	0	0	0	0	0.974866	0.00375882	0.987738
C2orf88	0	0	6.06588e-07	2.96077e-07	0	0	0	0	0	0	0.974845	0.00375874	0.987744
MUCL1	0	0	4.82974e-07	3.38272e-07	0	0	0	0	0	0	0.974827	0.00375867	0.987749
DEFB105B	0	0	5.33087e-07	3.21726e-07	0	0	0	0	0	0	0.974819	0.00375864	0.987755
TMEM257	0	0	4.92921e-07	3.38344e-07	0	0	0	0	0	0	0.974734	0.00375831	0.98776
SMCO4	0	0	9.81652e-07	1.75081e-07	0	0	0	0	0	0	0.974711	0.00375822	0.987765
KRTAP19-4	0	0	6.74346e-07	2.7907e-07	0	0	0	0	0	0	0.974688	0.00375814	0.98777
RPL36AL	0	0	2.98294e-07	4.06843e-07	0	0	0	0	0	0	0.97465	0.00375799	0.987776
SPRR2A	0	0	6.85814e-07	2.76876e-07	0	0	0	0	0	0	0.974643	0.00375796	0.987781
MT1B	0	0	6.50896e-07	2.89184e-07	0	0	0	0	0	0	0.974627	0.0037579	0.987786
PCP4	0	0	6.80648e-07	2.80522e-07	0	0	0	0	0	0	0.974591	0.00375776	0.987792
MT1M	0	0	6.96823e-07	2.75235e-07	0	0	0	0	0	0	0.974587	0.00375775	0.987797
ARMS2	0	0	5.16639e-07	3.36541e-07	0	0	0	0	0	0	0.974566	0.00375767	0.987802
MCF2L	0	0	2.34744e-05	5.49594e-06	1	0	0	1	0	0	0.974474	0.00375732	0.987808
KRTAP19-5	0	0	6.20551e-07	3.06275e-07	0	0	0	0	0	0	0.974439	0.00375718	0.987813
KRTAP19-3	0	0	6.08846e-07	3.10641e-07	0	0	0	0	0	0	0.974427	0.00375714	0.987818
USMG5	0	0	5.96293e-07	3.14858e-07	0	0	0	0	0	0	0.974427	0.00375714	0.987823
GNG12	0	0	7.65215e-07	2.58891e-07	0	0	0	0	0	0	0.974407	0.00375706	0.987829
POLR2L	0	0	7.91758e-07	2.51028e-07	0	0	0	0	0	0	0.974378	0.00375695	0.987834
LCE4A	0	0	6.2543e-07	3.07929e-07	0	0	0	0	0	0	0.97435	0.00375684	0.987839
MORN2	0	0	7.02817e-07	2.82113e-07	0	0	0	0	0	0	0.974345	0.00375682	0.987844
DEFB115	0	0	6.35021e-07	3.0496e-07	0	0	0	0	0	0	0.974343	0.00375681	0.987849
STATH	0	0	4.81053e-07	3.57569e-07	0	0	0	0	0	0	0.974319	0.00375672	0.987855
KRTAP8-1	0	0	9.22211e-07	2.09782e-07	0	0	0	0	0	0	0.974309	0.00375668	0.98786
IAPP	0	0	7.17772e-07	2.78824e-07	0	0	0	0	0	0	0.974298	0.00375664	0.987865
ST20	0	0	5.41298e-07	3.3812e-07	0	0	0	0	0	0	0.974297	0.00375663	0.98787
DYNLL1	0	0	2.80919e-07	4.25924e-07	0	0	0	0	0	0	0.974289	0.0037566	0.987875
GTF2H5	0	0	5.78348e-07	3.26372e-07	0	0	0	0	0	0	0.974278	0.00375656	0.987881
S100P	0	0	6.93831e-07	2.88047e-07	0	0	0	0	0	0	0.974265	0.00375651	0.987886
CMC4	0	0	6.73596e-07	2.98525e-07	0	0	0	0	0	0	0.974165	0.00375613	0.987891
MT2A	0	0	6.77632e-07	2.98372e-07	0	0	0	0	0	0	0.974132	0.003756	0.987896
WFDC6	0	0	5.43387e-07	3.43707e-07	0	0	0	0	0	0	0.974126	0.00375598	0.987901
LCE3A	0	0	7.27044e-07	2.83124e-07	0	0	0	0	0	0	0.974096	0.00375586	0.987906
GNG2	0	0	8.82564e-07	2.31052e-07	0	0	0	0	0	0	0.974092	0.00375585	0.987912
CCL8	0	0	4.6654e-07	3.71106e-07	0	0	0	0	0	0	0.974083	0.00375581	0.987917
MLLT11	0	0	7.86314e-07	2.63908e-07	0	0	0	0	0	0	0.974077	0.00375579	0.987922
TMEM133	0	0	4.78138e-07	3.68033e-07	0	0	0	0	0	0	0.97406	0.00375573	0.987927
MT1X	0	0	7.33341e-07	2.82425e-07	0	0	0	0	0	0	0.974057	0.00375571	0.987932
KRTAP21-2	0	0	6.61752e-07	3.08741e-07	0	0	0	0	0	0	0.973995	0.00375548	0.987937
C18orf32	0	0	7.66447e-07	2.75312e-07	0	0	0	0	0	0	0.973948	0.00375529	0.987942
SPANXN4	0	0	5.76271e-07	3.40499e-07	0	0	0	0	0	0	0.973912	0.00375516	0.987947
DEFB113	0	0	6.20443e-07	3.25862e-07	0	0	0	0	0	0	0.973907	0.00375514	0.987953
DEFB128	0	0	6.99682e-07	3.02386e-07	0	0	0	0	0	0	0.973821	0.00375481	0.987958
GNG10	0	0	8.619e-07	2.50068e-07	0	0	0	0	0	0	0.973763	0.00375458	0.987963
S100A11	0	0	5.40299e-07	3.59029e-07	0	0	0	0	0	0	0.973737	0.00375448	0.987968
GNGT2	0	0	8.68451e-07	2.49003e-07	0	0	0	0	0	0	0.973732	0.00375446	0.987973
BLID	0	0	4.56741e-07	3.90201e-07	0	0	0	0	0	0	0.973653	0.00375416	0.987978
HMGN4	0	0	6.42638e-07	3.28529e-07	0	0	0	0	0	0	0.973631	0.00375408	0.987983
COX14	0	0	7.54892e-07	2.91816e-07	0	0	0	0	0	0	0.973604	0.00375397	0.987988
EIF1	0	0	2.39514e-07	4.66007e-07	0	0	0	0	0	0	0.973577	0.00375387	0.987993
ZNF706	0	0	6.92887e-07	3.15914e-07	0	0	0	0	0	0	0.973515	0.00375363	0.987998
PMAIP1	0	0	1.06928e-06	1.90842e-07	0	0	0	0	0	0	0.973481	0.0037535	0.988003
FAM229B	0	0	8.56832e-07	2.64239e-07	0	0	0	0	0	0	0.973423	0.00375328	0.988008
UBL5	0	0	6.61155e-07	3.30963e-07	0	0	0	0	0	0	0.973396	0.00375317	0.988013
CLLU1OS	0	0	5.08559e-07	3.8256e-07	0	0	0	0	0	0	0.973387	0.00375314	0.988018
SCGB1A1	0	0	6.4752e-07	3.36763e-07	0	0	0	0	0	0	0.973363	0.00375305	0.988023
GNGT1	0	0	5.72276e-07	3.62507e-07	0	0	0	0	0	0	0.97335	0.003753	0.988028
C9orf153	0	0	6.03499e-07	3.54487e-07	0	0	0	0	0	0	0.973283	0.00375274	0.988033
DEFB123	0	0	7.41018e-07	3.08417e-07	0	0	0	0	0	0	0.973279	0.00375273	0.988038
S100A12	0	0	7.60509e-07	3.068e-07	0	0	0	0	0	0	0.973145	0.00375221	0.988043
KRTAP19-8	0	0	6.31393e-07	3.50337e-07	0	0	0	0	0	0	0.973141	0.00375219	0.988048
DYNLL2	0	0	4.474e-07	4.12484e-07	0	0	0	0	0	0	0.973132	0.00375216	0.988053
SMIM15	0	0	6.27611e-07	3.52766e-07	0	0	0	0	0	0	0.973109	0.00375207	0.988058
SMIM5	0	0	8.96612e-07	2.63167e-07	0	0	0	0	0	0	0.973089	0.003752	0.988063
SCGB3A1	0	0	6.36034e-07	3.51453e-07	0	0	0	0	0	0	0.973068	0.00375191	0.988068
KRTAP6-2	0	0	9.19022e-07	2.56583e-07	0	0	0	0	0	0	0.973064	0.0037519	0.988073
SFTA3	0	0	3.99158e-07	4.32197e-07	0	0	0	0	0	0	0.973036	0.00375179	0.988078
DEFB127	0	0	6.42873e-07	3.50405e-07	0	0	0	0	0	0	0.973034	0.00375178	0.988083
ATOX1	0	0	8.90816e-07	2.68009e-07	0	0	0	0	0	0	0.97301	0.00375169	0.988088
COX17	0	0	1.02104e-06	2.26053e-07	0	0	0	0	0	0	0.972963	0.00375151	0.988093
TIAF1	0	0	6.58478e-07	3.5035e-07	0	0	0	0	0	0	0.972893	0.00375124	0.988098
CCL13	0	0	6.3269e-07	3.61663e-07	0	0	0	0	0	0	0.972821	0.00375096	0.988103
ADIRF	0	0	7.02547e-07	3.3966e-07	0	0	0	0	0	0	0.972781	0.00375081	0.988107
S100A4	0	0	7.47375e-07	3.24608e-07	0	0	0	0	0	0	0.972781	0.00375081	0.988112
CTXN2	0	0	7.59357e-07	3.2136e-07	0	0	0	0	0	0	0.97276	0.00375073	0.988117
DEFB132	0	0	6.30061e-07	3.65111e-07	0	0	0	0	0	0	0.972751	0.0037507	0.988122
GNG13	0	0	9.15856e-07	2.69523e-07	0	0	0	0	0	0	0.972741	0.00375066	0.988127
CCL4L2	0	0	9.37136e-07	2.62915e-07	0	0	0	0	0	0	0.972726	0.0037506	0.988132
GNG11	0	0	9.3758e-07	2.62773e-07	0	0	0	0	0	0	0.972726	0.0037506	0.988137
SCGB2A1	0	0	6.3419e-07	3.64851e-07	0	0	0	0	0	0	0.97272	0.00375058	0.988142
COX8C	0	0	1.03185e-06	2.3142e-07	0	0	0	0	0	0	0.972718	0.00375057	0.988146
S100Z	0	0	7.39311e-07	3.3006e-07	0	0	0	0	0	0	0.972706	0.00375052	0.988151
SCGB3A2	0	0	8.01841e-07	3.10271e-07	0	0	0	0	0	0	0.972673	0.0037504	0.988156
ENHO	0	0	1.07215e-06	2.20708e-07	0	0	0	0	0	0	0.972642	0.00375028	0.988161
KRTAP12-3	0	0	8.07141e-07	3.09754e-07	0	0	0	0	0	0	0.972639	0.00375027	0.988166
DEFB124	0	0	9.28543e-07	2.70359e-07	0	0	0	0	0	0	0.972602	0.00375012	0.988171
TRIAP1	0	0	8.75519e-07	2.89601e-07	0	0	0	0	0	0	0.972563	0.00374997	0.988176
MT1E	0	0	8.58207e-07	2.9676e-07	0	0	0	0	0	0	0.972526	0.00374983	0.98818
LEAP2	0	0	8.40686e-07	3.04403e-07	0	0	0	0	0	0	0.972478	0.00374965	0.988185
COX7B	0	0	6.67684e-07	3.67267e-07	0	0	0	0	0	0	0.972349	0.00374915	0.98819
ANAPC13	0	0	6.23759e-07	3.82737e-07	0	0	0	0	0	0	0.972329	0.00374908	0.988195
UQCR11	0	0	1.05036e-06	2.41447e-07	0	0	0	0	0	0	0.972277	0.00374887	0.9882
LCE3D	0	0	9.11124e-07	2.88251e-07	0	0	0	0	0	0	0.972275	0.00374887	0.988204
CMC2	0	0	6.49441e-07	3.76235e-07	0	0	0	0	0	0	0.972271	0.00374885	0.988209
FAM24A	0	0	8.59838e-07	3.10594e-07	0	0	0	0	0	0	0.972135	0.00374833	0.988214
DEFB136	0	0	9.59739e-07	2.78094e-07	0	0	0	0	0	0	0.972107	0.00374822	0.988219
TCEAL7	0	0	8.81616e-07	3.04408e-07	0	0	0	0	0	0	0.972105	0.00374821	0.988223
MT3	0	0	8.19975e-07	3.25411e-07	0	0	0	0	0	0	0.972096	0.00374818	0.988228
TMEM167A	0	0	5.76583e-07	4.08582e-07	0	0	0	0	0	0	0.972058	0.00374803	0.988233
SMAGP	0	0	7.1628e-07	3.62397e-07	0	0	0	0	0	0	0.972037	0.00374795	0.988238
LCE3C	0	0	9.47102e-07	2.90741e-07	0	0	0	0	0	0	0.971879	0.00374735	0.988243
CSAG1	0	0	3.28626e-07	4.99207e-07	0	0	0	0	0	0	0.97186	0.00374727	0.988247
MT4	0	0	9.67479e-07	2.86211e-07	0	0	0	0	0	0	0.971816	0.0037471	0.988252
SERP2	0	0	9.68201e-07	2.86093e-07	0	0	0	0	0	0	0.971813	0.00374709	0.988257
SPINK7	0	0	7.51228e-07	3.59897e-07	0	0	0	0	0	0	0.971786	0.00374699	0.988261
S100A7	0	0	9.12321e-07	3.05824e-07	0	0	0	0	0	0	0.971786	0.00374699	0.988266
S100A13	0	0	8.55896e-07	3.25638e-07	0	0	0	0	0	0	0.971762	0.0037469	0.988271
S100A8	0	0	8.99875e-07	3.12597e-07	0	0	0	0	0	0	0.971716	0.00374672	0.988276
APOC1	0	0	8.36124e-07	3.34986e-07	0	0	0	0	0	0	0.971689	0.00374662	0.98828
PHGR1	0	0	9.53627e-07	2.95874e-07	0	0	0	0	0	0	0.97168	0.00374658	0.988285
PKIA	0	0	7.27823e-07	3.71935e-07	0	0	0	0	0	0	0.971673	0.00374655	0.98829
RPL36	0	0	5.45748e-07	4.34038e-07	0	0	0	0	0	0	0.971647	0.00374646	0.988294
APOC3	0	0	6.51381e-07	3.98556e-07	0	0	0	0	0	0	0.971647	0.00374646	0.988299
BEX5	0	0	9.26485e-07	3.07726e-07	0	0	0	0	0	0	0.971605	0.00374629	0.988304
FAM24B	0	0	9.19128e-07	3.1061e-07	0	0	0	0	0	0	0.971594	0.00374625	0.988308
CCL1	0	0	7.04904e-07	3.83139e-07	0	0	0	0	0	0	0.971578	0.00374619	0.988313
CCL2	0	0	7.32718e-07	3.74039e-07	0	0	0	0	0	0	0.971571	0.00374616	0.988318
C12orf75	0	0	8.26562e-07	3.42645e-07	0	0	0	0	0	0	0.971568	0.00374615	0.988322
WFDC12	0	0	6.45383e-07	4.05044e-07	0	0	0	0	0	0	0.971526	0.00374599	0.988327
KRTAP19-1	0	0	7.9072e-07	3.58427e-07	0	0	0	0	0	0	0.971466	0.00374576	0.988332
S100A7A	0	0	9.35112e-07	3.12419e-07	0	0	0	0	0	0	0.971399	0.0037455	0.988336
RPS29	0	0	5.31684e-07	4.49326e-07	0	0	0	0	0	0	0.971361	0.00374536	0.988341
AHSP	0	0	6.11857e-07	4.23021e-07	0	0	0	0	0	0	0.971343	0.00374529	0.988346
SPINK1	0	0	8.29097e-07	3.52392e-07	0	0	0	0	0	0	0.97128	0.00374505	0.98835
GNG4	0	0	1.15106e-06	2.44921e-07	0	0	0	0	0	0	0.971264	0.00374498	0.988355
SNRPF	0	0	7.17338e-07	3.90578e-07	0	0	0	0	0	0	0.971262	0.00374498	0.988359
C2orf66	0	0	8.39649e-07	3.50341e-07	0	0	0	0	0	0	0.97124	0.00374489	0.988364
RPL32	0	0	2.8971e-07	5.35269e-07	0	0	0	0	0	0	0.971236	0.00374487	0.988369
CT62	0	0	6.08355e-07	4.2915e-07	0	0	0	0	0	0	0.971209	0.00374477	0.988373
DEFB116	0	0	5.17694e-07	4.61602e-07	0	0	0	0	0	0	0.971155	0.00374457	0.988378
ATP5I	0	0	8.8838e-07	3.37519e-07	0	0	0	0	0	0	0.971144	0.00374452	0.988382
DEFB135	0	0	8.00113e-07	3.69017e-07	0	0	0	0	0	0	0.971093	0.00374433	0.988387
CCL7	0	0	7.6202e-07	3.82275e-07	0	0	0	0	0	0	0.97108	0.00374428	0.988392
TMEM258	0	0	8.92545e-07	3.38909e-07	0	0	0	0	0	0	0.971068	0.00374423	0.988396
WFDC9	0	0	7.57326e-07	3.87399e-07	0	0	0	0	0	0	0.970984	0.00374391	0.988401
BRK1	0	0	9.51493e-07	3.23903e-07	0	0	0	0	0	0	0.970938	0.00374373	0.988405
C16orf74	0	0	1.05079e-06	2.91624e-07	0	0	0	0	0	0	0.97091	0.00374362	0.98841
SVIP	0	0	8.36052e-07	3.63831e-07	0	0	0	0	0	0	0.970906	0.00374361	0.988414
HSPE1	0	0	3.97296e-07	5.12387e-07	0	0	0	0	0	0	0.970875	0.00374349	0.988419
NDUFA1	0	0	1.02362e-06	3.02693e-07	0	0	0	0	0	0	0.970857	0.00374342	0.988423
FDCSP	0	0	6.51262e-07	4.28014e-07	0	0	0	0	0	0	0.970849	0.00374339	0.988428
SCGB2A2	0	0	8.47629e-07	3.62927e-07	0	0	0	0	0	0	0.970825	0.0037433	0.988432
NCMAP	0	0	9.5101e-07	3.28415e-07	0	0	0	0	0	0	0.97082	0.00374328	0.988437
MINOS1	0	0	7.66007e-07	3.91259e-07	0	0	0	0	0	0	0.9708	0.0037432	0.988442
TMEM167B	0	0	9.9372e-07	3.15974e-07	0	0	0	0	0	0	0.970768	0.00374308	0.988446
C9orf16	0	0	1.05848e-06	2.95247e-07	0	0	0	0	0	0	0.970741	0.00374298	0.988451
ANP32D	0	0	8.30016e-07	3.72609e-07	0	0	0	0	0	0	0.970723	0.00374291	0.988455
PXT1	0	0	2.49969e-07	5.6835e-07	0	0	0	0	0	0	0.970701	0.00374282	0.98846
SS18L2	0	0	9.38732e-07	3.39105e-07	0	0	0	0	0	0	0.970642	0.00374259	0.988464
COX8A	0	0	1.28387e-06	2.23403e-07	0	0	0	0	0	0	0.970639	0.00374258	0.988469
KRTAP3-2	0	0	1.11027e-06	2.8228e-07	0	0	0	0	0	0	0.970621	0.00374252	0.988473
XPA	0	0	3.52044e-06	1.26309e-06	1	0	0	2	0	0	0.970612	0.00374248	0.988477
C14orf2	0	0	8.34781e-07	3.75556e-07	0	0	0	0	0	0	0.9706	0.00374243	0.988482
SPANXB1	0	0	1.37523e-06	1.97342e-07	0	0	0	0	0	0	0.970515	0.00374211	0.988486
CT83	0	0	6.7872e-07	4.31542e-07	0	0	0	0	0	0	0.970503	0.00374206	0.988491
WFDC10A	0	0	7.86008e-07	3.95686e-07	0	0	0	0	0	0	0.970498	0.00374204	0.988495
RPS15A	0	0	2.13132e-07	5.88378e-07	0	0	0	0	0	0	0.970493	0.00374202	0.9885
DAPL1	0	0	6.74144e-07	4.33621e-07	0	0	0	0	0	0	0.970488	0.003742	0.988504
PLGLB1	0	0	8.48909e-07	3.74933e-07	0	0	0	0	0	0	0.970488	0.003742	0.988509
CCL16	0	0	6.58106e-07	4.40146e-07	0	0	0	0	0	0	0.970457	0.00374188	0.988513
S100B	0	0	1.07088e-06	3.01598e-07	0	0	0	0	0	0	0.970456	0.00374188	0.988518
CNPY1	0	0	8.83465e-07	3.64777e-07	0	0	0	0	0	0	0.970449	0.00374185	0.988522
TMA7	0	0	9.51918e-07	3.42911e-07	0	0	0	0	0	0	0.970418	0.00374174	0.988526
COA5	0	0	9.59135e-07	3.407e-07	0	0	0	0	0	0	0.970413	0.00374171	0.988531
S100A3	0	0	8.02105e-07	3.93577e-07	0	0	0	0	0	0	0.970408	0.0037417	0.988535
SCGB1D1	0	0	9.57831e-07	3.41413e-07	0	0	0	0	0	0	0.970405	0.00374168	0.98854
KRTAP12-4	0	0	9.70078e-07	3.37431e-07	0	0	0	0	0	0	0.970402	0.00374167	0.988544
DPH3	0	0	9.88255e-07	3.32052e-07	0	0	0	0	0	0	0.970382	0.0037416	0.988548
TNP1	0	0	1.14804e-06	2.79925e-07	0	0	0	0	0	0	0.970341	0.00374144	0.988553
WFDC13	0	0	8.94041e-07	3.6728e-07	0	0	0	0	0	0	0.970284	0.00374122	0.988557
KRTAP15-1	0	0	7.27066e-07	4.23606e-07	0	0	0	0	0	0	0.970277	0.00374119	0.988562
TIMM8A	0	0	7.45394e-07	4.20015e-07	0	0	0	0	0	0	0.970208	0.00374093	0.988566
SPINK6	0	0	9.30616e-07	3.58708e-07	0	0	0	0	0	0	0.970184	0.00374083	0.98857
SPRR1B	0	0	1.02705e-06	3.27507e-07	0	0	0	0	0	0	0.970152	0.00374071	0.988575
SPTSSA	0	0	1.08683e-06	3.09854e-07	0	0	0	0	0	0	0.970087	0.00374046	0.988579
C12orf73	0	0	1.00187e-06	3.39273e-07	0	0	0	0	0	0	0.970062	0.00374037	0.988583
SNURF	0	0	7.00385e-07	4.4104e-07	0	0	0	0	0	0	0.970048	0.00374031	0.988588
RPLP1	0	0	7.61316e-07	4.22438e-07	0	0	0	0	0	0	0.969997	0.00374012	0.988592
CDC42SE2	0	0	7.35303e-07	4.3379e-07	0	0	0	0	0	0	0.969926	0.00373984	0.988596
RPL30	0	0	5.7066e-07	4.8951e-07	0	0	0	0	0	0	0.969915	0.0037398	0.988601
SPINK9	0	0	8.75145e-07	3.87275e-07	0	0	0	0	0	0	0.969914	0.0037398	0.988605
SUMO1	0	0	6.24218e-07	4.71656e-07	0	0	0	0	0	0	0.969911	0.00373979	0.988609
SPTSSB	0	0	1.00046e-06	3.45963e-07	0	0	0	0	0	0	0.969894	0.00373972	0.988614
CCL18	0	0	8.96574e-07	3.8135e-07	0	0	0	0	0	0	0.96988	0.00373967	0.988618
TMEM155	0	0	6.51377e-07	4.63877e-07	0	0	0	0	0	0	0.969875	0.00373965	0.988622
SCGB1D4	0	0	7.10377e-07	4.4483e-07	0	0	0	0	0	0	0.969854	0.00373957	0.988627
APOA2	0	0	8.55549e-07	3.96436e-07	0	0	0	0	0	0	0.969844	0.00373953	0.988631
PKIB	0	0	1.00913e-06	3.46189e-07	0	0	0	0	0	0	0.969809	0.00373939	0.988635
LELP1	0	0	1.04083e-06	3.38906e-07	0	0	0	0	0	0	0.969718	0.00373904	0.98864
PPY	0	0	9.13893e-07	3.82735e-07	0	0	0	0	0	0	0.969684	0.00373892	0.988644
LCE2D	0	0	1.09386e-06	3.22644e-07	0	0	0	0	0	0	0.969676	0.00373888	0.988648
WFDC11	0	0	6.28361e-07	4.81104e-07	0	0	0	0	0	0	0.969617	0.00373866	0.988652
GNG3	0	0	1.34805e-06	2.40254e-07	0	0	0	0	0	0	0.969598	0.00373858	0.988657
C14orf177	0	0	7.78955e-07	4.31267e-07	0	0	0	0	0	0	0.969597	0.00373858	0.988661
LSM5	0	0	8.37837e-07	4.14478e-07	0	0	0	0	0	0	0.969516	0.00373827	0.988665
CKS2	0	0	5.72956e-07	5.04787e-07	0	0	0	0	0	0	0.96948	0.00373813	0.98867
S100A14	0	0	9.08783e-07	3.92733e-07	0	0	0	0	0	0	0.96946	0.00373805	0.988674
TRIQK	0	0	7.5407e-07	4.45427e-07	0	0	0	0	0	0	0.96944	0.00373798	0.988678
COA4	0	0	1.05484e-06	3.45522e-07	0	0	0	0	0	0	0.969411	0.00373787	0.988682
LCE2B	0	0	1.13457e-06	3.20493e-07	0	0	0	0	0	0	0.969364	0.00373769	0.988687
FAU	0	0	5.68267e-07	5.11091e-07	0	0	0	0	0	0	0.969352	0.00373764	0.988691
LCE2A	0	0	8.78489e-07	4.06926e-07	0	0	0	0	0	0	0.969351	0.00373764	0.988695
DEFA3	0	0	1.08663e-06	3.37063e-07	0	0	0	0	0	0	0.969351	0.00373764	0.988699
TSACC	0	0	7.02613e-07	4.66643e-07	0	0	0	0	0	0	0.969333	0.00373757	0.988703
HIST1H2BL	0	0	1.07537e-06	3.42329e-07	0	0	0	0	0	0	0.969311	0.00373748	0.988708
HIGD1C	0	0	6.50736e-07	4.85612e-07	0	0	0	0	0	0	0.969292	0.00373741	0.988712
SMIM8	0	0	9.34635e-07	3.9042e-07	0	0	0	0	0	0	0.969287	0.00373739	0.988716
SYCE3	0	0	1.1624e-06	3.14729e-07	0	0	0	0	0	0	0.969267	0.00373731	0.98872
HIST1H2BM	0	0	1.09634e-06	3.38598e-07	0	0	0	0	0	0	0.969221	0.00373714	0.988724
LCE1A	0	0	1.06578e-06	3.48865e-07	0	0	0	0	0	0	0.969221	0.00373713	0.988729
SPINT4	0	0	7.31259e-07	4.61526e-07	0	0	0	0	0	0	0.969211	0.0037371	0.988733
SMPX	0	0	1.07275e-06	3.49705e-07	0	0	0	0	0	0	0.969135	0.0037368	0.988737
ATP5L	0	0	6.62697e-07	4.87461e-07	0	0	0	0	0	0	0.969133	0.0037368	0.988741
RAB42	0	0	1.16134e-06	3.22836e-07	0	0	0	0	0	0	0.969057	0.00373651	0.988745
PCP4L1	0	0	1.05322e-06	3.59964e-07	0	0	0	0	0	0	0.969034	0.00373642	0.98875
SPINK8	0	0	7.13722e-07	4.73973e-07	0	0	0	0	0	0	0.969034	0.00373642	0.988754
HMGN1	0	0	5.945e-07	5.15304e-07	0	0	0	0	0	0	0.968999	0.00373628	0.988758
XAGE1B	0	0	8.72386e-07	4.23058e-07	0	0	0	0	0	0	0.96897	0.00373617	0.988762
SMIM21	0	0	5.1273e-07	5.44077e-07	0	0	0	0	0	0	0.968964	0.00373615	0.988766
DEFA1	0	0	1.08494e-06	3.52728e-07	0	0	0	0	0	0	0.968942	0.00373606	0.98877
SPINK4	0	0	9.65974e-07	3.9299e-07	0	0	0	0	0	0	0.968933	0.00373603	0.988775
PBOV1	0	0	7.04593e-07	4.82096e-07	0	0	0	0	0	0	0.968897	0.00373589	0.988779
S100A2	0	0	9.37768e-07	4.04837e-07	0	0	0	0	0	0	0.968868	0.00373578	0.988783
SPINK14	0	0	7.82595e-07	4.5711e-07	0	0	0	0	0	0	0.968864	0.00373576	0.988787
CCL4	0	0	1.04643e-06	3.68708e-07	0	0	0	0	0	0	0.968859	0.00373575	0.988791
TFF1	0	0	1.16667e-06	3.30001e-07	0	0	0	0	0	0	0.968815	0.00373557	0.988795
ENY2	0	0	7.23378e-07	4.7883e-07	0	0	0	0	0	0	0.968814	0.00373557	0.988799
ACBD7	0	0	9.16027e-07	4.15065e-07	0	0	0	0	0	0	0.968789	0.00373548	0.988803
SMCP	0	0	8.57146e-07	4.35834e-07	0	0	0	0	0	0	0.968762	0.00373537	0.988808
SPRR1A	0	0	1.16822e-06	3.31574e-07	0	0	0	0	0	0	0.968758	0.00373536	0.988812
TIMM10	0	0	9.61282e-07	4.0244e-07	0	0	0	0	0	0	0.96872	0.00373521	0.988816
SCGB1C1	0	0	8.27993e-07	4.47554e-07	0	0	0	0	0	0	0.96871	0.00373517	0.98882
CXCL10	0	0	9.66216e-07	4.01666e-07	0	0	0	0	0	0	0.968696	0.00373512	0.988824
MANBAL	0	0	1.35358e-06	2.72528e-07	0	0	0	0	0	0	0.968673	0.00373503	0.988828
ATXN7L3B	0	0	1.27406e-06	3.00093e-07	0	0	0	0	0	0	0.968649	0.00373494	0.988832
LCE3E	0	0	1.06802e-06	3.7003e-07	0	0	0	0	0	0	0.968627	0.00373485	0.988836
PATE4	0	0	7.65405e-07	4.7256e-07	0	0	0	0	0	0	0.968602	0.00373476	0.98884
ZNF2	0	0	9.63573e-07	4.06091e-07	0	0	0	0	0	0	0.9686	0.00373475	0.988844
S100A5	0	0	1.32832e-06	2.84696e-07	0	0	0	0	0	0	0.968573	0.00373465	0.988848
RPS12	0	0	5.16165e-07	5.58591e-07	0	0	0	0	0	0	0.96854	0.00373452	0.988852
SMR3A	0	0	9.63998e-07	4.09275e-07	0	0	0	0	0	0	0.96851	0.0037344	0.988856
RPL38	0	0	4.03225e-07	5.98111e-07	0	0	0	0	0	0	0.968498	0.00373436	0.988861
BLCAP	0	0	1.38853e-06	2.67937e-07	0	0	0	0	0	0	0.96848	0.00373429	0.988865
CCL15	0	0	8.17208e-07	4.59828e-07	0	0	0	0	0	0	0.968476	0.00373427	0.988869
CDC42SE1	0	0	9.59805e-07	4.12559e-07	0	0	0	0	0	0	0.968459	0.00373421	0.988873
HSBP1L1	0	0	1.11603e-06	3.60324e-07	0	0	0	0	0	0	0.968454	0.00373419	0.988877
KRTAP5-6	0	0	1.08055e-06	3.73756e-07	0	0	0	0	0	0	0.968412	0.00373403	0.988881
GTF2A2	0	0	8.20727e-07	4.61421e-07	0	0	0	0	0	0	0.9684	0.00373398	0.988885
USP6	0	0	2.02537e-05	6.77139e-06	1	0	0	1	0	0	0.968399	0.00373398	0.988889
NDUFA4	0	0	7.56449e-07	4.83708e-07	0	0	0	0	0	0	0.968382	0.00373391	0.988893
NOP10	0	0	7.28253e-07	4.93834e-07	0	0	0	0	0	0	0.968364	0.00373384	0.988897
SNRPG	0	0	2.62103e-07	6.50952e-07	0	0	0	0	0	0	0.968352	0.0037338	0.988901
SCRG1	0	0	1.23771e-06	3.23475e-07	0	0	0	0	0	0	0.968346	0.00373377	0.988905
DYNLRB2	0	0	5.96688e-07	5.38708e-07	0	0	0	0	0	0	0.968346	0.00373377	0.988909
C5orf46	0	0	9.77409e-07	4.12489e-07	0	0	0	0	0	0	0.968301	0.0037336	0.988913
PDE6H	0	0	1.24077e-06	3.24879e-07	0	0	0	0	0	0	0.96828	0.00373352	0.988917
COX7A2	0	0	8.01681e-07	4.73636e-07	0	0	0	0	0	0	0.968243	0.00373338	0.988921
TIMM9	0	0	7.40469e-07	4.94626e-07	0	0	0	0	0	0	0.968231	0.00373333	0.988925
C8orf22	0	0	5.70888e-07	5.51824e-07	0	0	0	0	0	0	0.968225	0.00373331	0.988929
C14orf178	0	0	9.36868e-07	4.29725e-07	0	0	0	0	0	0	0.968203	0.00373322	0.988933
CCL11	0	0	8.73893e-07	4.51599e-07	0	0	0	0	0	0	0.968183	0.00373315	0.988937
PTH	0	0	8.73501e-07	4.52169e-07	0	0	0	0	0	0	0.968171	0.0037331	0.988941
OTOS	0	0	1.12075e-06	3.71179e-07	0	0	0	0	0	0	0.968117	0.00373289	0.988945
IFITM1	0	0	9.91706e-07	4.1551e-07	0	0	0	0	0	0	0.968089	0.00373279	0.988949
SPINK13	0	0	7.77304e-07	4.88521e-07	0	0	0	0	0	0	0.968062	0.00373268	0.988953
SPATA8	0	0	6.93705e-07	5.16768e-07	0	0	0	0	0	0	0.968057	0.00373267	0.988956
PF4	0	0	1.1524e-06	3.62942e-07	0	0	0	0	0	0	0.968052	0.00373265	0.98896
IFITM3	0	0	1.02029e-06	4.07628e-07	0	0	0	0	0	0	0.968043	0.00373261	0.988964
SNRPE	0	0	4.31197e-07	6.06281e-07	0	0	0	0	0	0	0.968023	0.00373253	0.988968
ABRACL	0	0	1.14645e-06	3.67289e-07	0	0	0	0	0	0	0.967989	0.0037324	0.988972
RPL37A	0	0	7.16728e-07	5.13475e-07	0	0	0	0	0	0	0.967937	0.0037322	0.988976
C10orf55	0	0	8.51075e-07	4.68766e-07	0	0	0	0	0	0	0.967926	0.00373216	0.98898
NDUFB3	0	0	1.14981e-06	3.69119e-07	0	0	0	0	0	0	0.967909	0.0037321	0.988984
CTXN3	0	0	1.35263e-06	3.01551e-07	0	0	0	0	0	0	0.967896	0.00373205	0.988988
RETNLB	0	0	9.84112e-07	4.25785e-07	0	0	0	0	0	0	0.96788	0.00373199	0.988992
TMEM211	0	0	1.01112e-06	4.17328e-07	0	0	0	0	0	0	0.967864	0.00373192	0.988996
RPL37	0	0	4.56798e-07	6.05418e-07	0	0	0	0	0	0	0.967813	0.00373173	0.989
COX6B1	0	0	1.02938e-06	4.13233e-07	0	0	0	0	0	0	0.967809	0.00373171	0.989003
IFITM2	0	0	7.58198e-07	5.04775e-07	0	0	0	0	0	0	0.967796	0.00373166	0.989007
DEFB110	0	0	9.08478e-07	4.54611e-07	0	0	0	0	0	0	0.967787	0.00373163	0.989011
TAL2	0	0	1.34363e-06	3.08584e-07	0	0	0	0	0	0	0.967787	0.00373163	0.989015
SUMO2	0	0	4.10284e-07	6.22142e-07	0	0	0	0	0	0	0.967784	0.00373161	0.989019
KAAG1	0	0	1.54369e-06	2.44448e-07	0	0	0	0	0	0	0.967708	0.00373132	0.989023
LCE3B	0	0	1.0789e-06	4.00402e-07	0	0	0	0	0	0	0.967706	0.00373132	0.989027
GNG8	0	0	1.58619e-06	2.34043e-07	0	0	0	0	0	0	0.967604	0.00373092	0.989031
SERP1	0	0	1.43459e-06	2.85362e-07	0	0	0	0	0	0	0.96759	0.00373087	0.989035
DEFB118	0	0	6.68658e-07	5.42556e-07	0	0	0	0	0	0	0.967587	0.00373086	0.989038
KCNE3	0	0	1.49088e-06	2.66845e-07	0	0	0	0	0	0	0.967581	0.00373083	0.989042
CD59	0	0	8.64238e-07	4.79508e-07	0	0	0	0	0	0	0.967516	0.00373059	0.989046
MLN	0	0	7.69287e-07	5.13014e-07	0	0	0	0	0	0	0.967472	0.00373042	0.98905
DPY30	0	0	7.16464e-07	5.32399e-07	0	0	0	0	0	0	0.967428	0.00373025	0.989054
BET1	0	0	8.46684e-07	4.8933e-07	0	0	0	0	0	0	0.96741	0.00373018	0.989058
UCN2	0	0	1.06878e-06	4.1587e-07	0	0	0	0	0	0	0.96738	0.00373006	0.989061
CARD17	0	0	8.47422e-07	4.90881e-07	0	0	0	0	0	0	0.967361	0.00372999	0.989065
TIMM8B	0	0	1.0601e-06	4.21139e-07	0	0	0	0	0	0	0.967316	0.00372982	0.989069
PPBP	0	0	1.03601e-06	4.29976e-07	0	0	0	0	0	0	0.967296	0.00372974	0.989073
FMN1	0	0	1.98191e-05	6.95514e-06	1	0	0	1	0	0	0.967292	0.00372972	0.989077
PKIG	0	0	1.51322e-06	2.71097e-07	0	0	0	0	0	0	0.967263	0.00372961	0.989081
ANAPC16	0	0	1.02249e-06	4.36921e-07	0	0	0	0	0	0	0.967231	0.00372949	0.989084
IGFL4	0	0	7.09978e-07	5.42958e-07	0	0	0	0	0	0	0.967201	0.00372938	0.989088
HMGN2	0	0	9.53591e-07	4.61501e-07	0	0	0	0	0	0	0.967191	0.00372934	0.989092
CLPSL1	0	0	8.57692e-07	4.93926e-07	0	0	0	0	0	0	0.967185	0.00372932	0.989096
LCE1D	0	0	1.27302e-06	3.55363e-07	0	0	0	0	0	0	0.967163	0.00372923	0.9891
DCD	0	0	7.86021e-07	5.19829e-07	0	0	0	0	0	0	0.967136	0.00372913	0.989103
DPM2	0	0	9.74816e-07	4.56553e-07	0	0	0	0	0	0	0.967133	0.00372911	0.989107
FXYD6	0	0	8.85549e-07	4.88518e-07	0	0	0	0	0	0	0.967079	0.00372891	0.989111
C11orf94	0	0	1.09362e-06	4.19123e-07	0	0	0	0	0	0	0.967066	0.00372886	0.989115
EIF1B	0	0	8.96224e-07	4.85757e-07	0	0	0	0	0	0	0.967056	0.00372882	0.989119
CAMK2N1	0	0	1.54052e-06	2.70064e-07	0	0	0	0	0	0	0.967043	0.00372877	0.989122
MRPL33	0	0	9.60872e-07	4.64565e-07	0	0	0	0	0	0	0.967043	0.00372877	0.989126
PRM1	0	0	1.11963e-06	4.11479e-07	0	0	0	0	0	0	0.967037	0.00372875	0.98913
TXN	0	0	8.69601e-07	4.96489e-07	0	0	0	0	0	0	0.967008	0.00372864	0.989134
S100A1	0	0	1.4182e-06	3.13281e-07	0	0	0	0	0	0	0.966984	0.00372854	0.989137
FAM136A	0	0	8.63522e-07	4.99896e-07	0	0	0	0	0	0	0.966971	0.00372849	0.989141
CORT	0	0	9.9755e-07	4.55088e-07	0	0	0	0	0	0	0.966966	0.00372847	0.989145
S100A16	0	0	1.31199e-06	3.5052e-07	0	0	0	0	0	0	0.96694	0.00372837	0.989149
SMIM4	0	0	1.28554e-06	3.60129e-07	0	0	0	0	0	0	0.96692	0.0037283	0.989152
PRR15L	0	0	1.47771e-06	2.95881e-07	0	0	0	0	0	0	0.966915	0.00372828	0.989156
MYCBP	0	0	8.79584e-07	4.97353e-07	0	0	0	0	0	0	0.966894	0.0037282	0.98916
NPFF	0	0	9.29838e-07	4.81022e-07	0	0	0	0	0	0	0.966879	0.00372814	0.989164
LCE1B	0	0	1.28221e-06	3.65197e-07	0	0	0	0	0	0	0.966813	0.00372789	0.989167
HIST1H2BH	0	0	1.37687e-06	3.34624e-07	0	0	0	0	0	0	0.966782	0.00372777	0.989171
KRTAP3-3	0	0	1.31244e-06	3.57765e-07	0	0	0	0	0	0	0.96674	0.00372761	0.989175
PRCD	0	0	8.2193e-07	5.22873e-07	0	0	0	0	0	0	0.966728	0.00372756	0.989178
C3orf36	0	0	9.95979e-07	4.64494e-07	0	0	0	0	0	0	0.966726	0.00372755	0.989182
C2orf91	0	0	7.55013e-07	5.45694e-07	0	0	0	0	0	0	0.966719	0.00372752	0.989186
SMIM13	0	0	1.42686e-06	3.20213e-07	0	0	0	0	0	0	0.966718	0.00372752	0.98919
FXYD4	0	0	8.00219e-07	5.30609e-07	0	0	0	0	0	0	0.966716	0.00372751	0.989193
SLC51B	0	0	1.00826e-06	4.61366e-07	0	0	0	0	0	0	0.966699	0.00372745	0.989197
KRTAP3-1	0	0	1.55172e-06	2.79943e-07	0	0	0	0	0	0	0.966675	0.00372736	0.989201
PATE2	0	0	1.0442e-06	4.5127e-07	0	0	0	0	0	0	0.966646	0.00372724	0.989204
BANF2	0	0	9.28008e-07	4.90282e-07	0	0	0	0	0	0	0.966646	0.00372724	0.989208
AHSA2	0	0	7.32426e-07	5.56465e-07	0	0	0	0	0	0	0.966633	0.00372719	0.989212
LYRM7	0	0	9.48429e-07	4.8494e-07	0	0	0	0	0	0	0.966605	0.00372709	0.989215
SCGB1D2	0	0	1.05042e-06	4.52407e-07	0	0	0	0	0	0	0.966559	0.00372691	0.989219
HIGD1A	0	0	8.45145e-07	5.2166e-07	0	0	0	0	0	0	0.96655	0.00372688	0.989223
S100A9	0	0	1.05925e-06	4.56654e-07	0	0	0	0	0	0	0.966364	0.00372616	0.989226
SMIM14	0	0	1.18398e-06	4.14973e-07	0	0	0	0	0	0	0.966359	0.00372614	0.98923
APLN	0	0	1.59307e-06	2.77775e-07	0	0	0	0	0	0	0.966359	0.00372614	0.989234
CXCL17	0	0	6.80309e-07	5.86416e-07	0	0	0	0	0	0	0.966297	0.0037259	0.989237
GLRX	0	0	1.04977e-06	4.63537e-07	0	0	0	0	0	0	0.966264	0.00372578	0.989241
INSL4	0	0	8.06528e-07	5.45402e-07	0	0	0	0	0	0	0.966259	0.00372576	0.989245
MLANA	0	0	9.63622e-07	4.93235e-07	0	0	0	0	0	0	0.966243	0.0037257	0.989248
CCL20	0	0	1.14373e-06	4.34733e-07	0	0	0	0	0	0	0.96619	0.00372549	0.989252
HRCT1	0	0	1.62159e-06	2.77926e-07	0	0	0	0	0	0	0.966097	0.00372513	0.989256
LCE1E	0	0	1.37575e-06	3.61403e-07	0	0	0	0	0	0	0.966068	0.00372502	0.989259
TMEM105	0	0	8.98359e-07	5.23334e-07	0	0	0	0	0	0	0.966022	0.00372485	0.989263
DEFA5	0	0	1.24961e-06	4.05639e-07	0	0	0	0	0	0	0.966016	0.00372483	0.989266
COX6A1	0	0	1.2234e-06	4.14561e-07	0	0	0	0	0	0	0.966013	0.00372481	0.98927
LYRM2	0	0	1.34217e-06	3.75041e-07	0	0	0	0	0	0	0.966004	0.00372478	0.989274
ERH	0	0	7.05858e-07	5.89013e-07	0	0	0	0	0	0	0.965995	0.00372474	0.989277
KDM4B	0	0	2.74199e-05	4.53793e-06	1	0	0	1	0	0	0.965993	0.00372474	0.989281
DSCR4	0	0	1.19678e-06	4.25662e-07	0	0	0	0	0	0	0.965954	0.00372459	0.989284
UTS2B	0	0	5.47509e-07	6.43946e-07	0	0	0	0	0	0	0.965948	0.00372456	0.989288
PAGE4	0	0	8.36173e-07	5.48033e-07	0	0	0	0	0	0	0.965919	0.00372445	0.989292
LCE1C	0	0	1.37961e-06	3.65883e-07	0	0	0	0	0	0	0.965912	0.00372443	0.989295
MEIG1	0	0	1.33914e-06	3.80888e-07	0	0	0	0	0	0	0.965874	0.00372428	0.989299
RPS25	0	0	8.40185e-07	5.48409e-07	0	0	0	0	0	0	0.965873	0.00372427	0.989302
TEX12	0	0	7.95243e-07	5.64571e-07	0	0	0	0	0	0	0.965844	0.00372416	0.989306
SPINT3	0	0	9.1812e-07	5.24209e-07	0	0	0	0	0	0	0.965819	0.00372407	0.98931
RPL34	0	0	3.40447e-07	7.19279e-07	0	0	0	0	0	0	0.965794	0.00372397	0.989313
PSORS1C1	0	0	8.19295e-07	5.59287e-07	0	0	0	0	0	0	0.965768	0.00372387	0.989317
APOC2	0	0	8.82961e-07	5.38188e-07	0	0	0	0	0	0	0.965761	0.00372384	0.98932
SNTN	0	0	8.70615e-07	5.42438e-07	0	0	0	0	0	0	0.965758	0.00372383	0.989324
NDUFA3	0	0	1.36945e-06	3.76295e-07	0	0	0	0	0	0	0.965723	0.0037237	0.989327
PAGE2B	0	0	1.08708e-06	4.71485e-07	0	0	0	0	0	0	0.965711	0.00372365	0.989331
INSL5	0	0	1.0617e-06	4.80964e-07	0	0	0	0	0	0	0.965685	0.00372355	0.989335
CSTA	0	0	9.28285e-07	5.27409e-07	0	0	0	0	0	0	0.965641	0.00372338	0.989338
SNRPD2	0	0	1.03272e-06	4.94e-07	0	0	0	0	0	0	0.965596	0.00372321	0.989342
TMEM14C	0	0	1.01159e-06	5.01478e-07	0	0	0	0	0	0	0.965586	0.00372317	0.989345
XAGE3	0	0	7.59253e-07	5.86422e-07	0	0	0	0	0	0	0.96558	0.00372315	0.989349
ATP6V1G1	0	0	1.09276e-06	4.74804e-07	0	0	0	0	0	0	0.96557	0.00372311	0.989352
RPL27	0	0	7.42143e-07	5.92669e-07	0	0	0	0	0	0	0.965567	0.0037231	0.989356
C1orf189	0	0	7.91763e-07	5.7764e-07	0	0	0	0	0	0	0.965523	0.00372293	0.989359
NDUFA2	0	0	1.03891e-06	4.95434e-07	0	0	0	0	0	0	0.965501	0.00372285	0.989363
PATE3	0	0	1.05628e-06	4.897e-07	0	0	0	0	0	0	0.965499	0.00372284	0.989366
HIST3H2BB	0	0	1.49303e-06	3.44104e-07	0	0	0	0	0	0	0.965473	0.00372274	0.98937
DEFB103B	0	0	1.25751e-06	4.26255e-07	0	0	0	0	0	0	0.965388	0.00372241	0.989373
PATE1	0	0	9.16091e-07	5.41363e-07	0	0	0	0	0	0	0.965375	0.00372236	0.989377
TCEAL8	0	0	1.41765e-06	3.74396e-07	0	0	0	0	0	0	0.965338	0.00372222	0.98938
IFNA4	0	0	7.65558e-07	5.93755e-07	0	0	0	0	0	0	0.965325	0.00372217	0.989384
CST9	0	0	9.65174e-07	5.26754e-07	0	0	0	0	0	0	0.965324	0.00372217	0.989387
WFDC10B	0	0	8.97306e-07	5.49927e-07	0	0	0	0	0	0	0.965314	0.00372213	0.989391
ISCA1	0	0	8.04787e-07	5.81303e-07	0	0	0	0	0	0	0.965306	0.0037221	0.989394
C1D	0	0	8.73625e-07	5.58306e-07	0	0	0	0	0	0	0.965302	0.00372208	0.989398
LCE5A	0	0	1.18554e-06	4.53728e-07	0	0	0	0	0	0	0.965299	0.00372207	0.989401
HCST	0	0	1.35796e-06	3.96802e-07	0	0	0	0	0	0	0.965274	0.00372197	0.989405
CCL14	0	0	8.58808e-07	5.64411e-07	0	0	0	0	0	0	0.965272	0.00372197	0.989408
C6orf201	0	0	9.68135e-07	5.28233e-07	0	0	0	0	0	0	0.965258	0.00372191	0.989412
CCL27	0	0	1.01644e-06	5.12081e-07	0	0	0	0	0	0	0.965256	0.0037219	0.989415
LST1	0	0	8.49505e-07	5.69921e-07	0	0	0	0	0	0	0.965208	0.00372172	0.989419
NUPR1	0	0	1.33872e-06	4.0629e-07	0	0	0	0	0	0	0.965192	0.00372166	0.989422
COMMD6	0	0	1.13591e-06	4.74816e-07	0	0	0	0	0	0	0.965179	0.00372161	0.989426
C1orf210	0	0	1.23449e-06	4.41757e-07	0	0	0	0	0	0	0.965178	0.00372161	0.989429
LYRM9	0	0	1.2238e-06	4.45724e-07	0	0	0	0	0	0	0.965168	0.00372157	0.989433
C11orf45	0	0	9.43167e-07	5.4038e-07	0	0	0	0	0	0	0.965156	0.00372152	0.989436
TSHB	0	0	1.29018e-06	4.23923e-07	0	0	0	0	0	0	0.965155	0.00372152	0.98944
SPANXN3	0	0	1.0318e-06	5.10897e-07	0	0	0	0	0	0	0.965149	0.00372149	0.989443
RNASE8	0	0	1.12939e-06	4.78815e-07	0	0	0	0	0	0	0.96513	0.00372142	0.989446
RPL36A	0	0	4.97249e-07	6.9216e-07	0	0	0	0	0	0	0.965104	0.00372132	0.98945
IFNA17	0	0	8.14254e-07	5.85811e-07	0	0	0	0	0	0	0.965098	0.0037213	0.989453
TMEM244	0	0	7.23e-07	6.16522e-07	0	0	0	0	0	0	0.965097	0.00372129	0.989457
PAGE2	0	0	1.15915e-06	4.70309e-07	0	0	0	0	0	0	0.96509	0.00372127	0.98946
PRLH	0	0	1.50975e-06	3.53962e-07	0	0	0	0	0	0	0.965056	0.00372114	0.989464
CST8	0	0	9.79738e-07	5.32359e-07	0	0	0	0	0	0	0.965041	0.00372108	0.989467
NDUFS5	0	0	9.80805e-07	5.32306e-07	0	0	0	0	0	0	0.965033	0.00372105	0.98947
CMC1	0	0	1.25354e-06	4.40766e-07	0	0	0	0	0	0	0.965033	0.00372105	0.989474
MRPS36	0	0	1.30104e-06	4.24901e-07	0	0	0	0	0	0	0.965031	0.00372104	0.989477
OR4F29	0	0	8.22322e-07	5.86407e-07	0	0	0	0	0	0	0.965009	0.00372096	0.989481
ZMYM5	0	0	3.33599e-06	1.53285e-06	1	0	0	2	0	0	0.964995	0.0037209	0.989484
HIGD1B	0	0	1.14314e-06	4.79685e-07	0	0	0	0	0	0	0.964982	0.00372085	0.989487
[truncated: 15,571 more rows]

## Sheet: Table S9
Table S10. Deleterious CNV carrier status and PRS.
prs	cnv_type	lm_est	lm_95ci_l	lm_95ci_u	lm_p
height	del	0.197343	-0.108655	0.50334	0.206112
height	dup	-0.065336	-0.253004	0.122332	0.494853
OCD	del	-0.130263	-0.437972	0.177445	0.406533
OCD	dup	-0.0112259	-0.199924	0.177473	0.907137
CDG	del	-0.453187	-0.755804	-0.15057	0.00335056
CDG	dup	0.0491759	-0.136718	0.23507	0.603977

[truncated: 1 more sheets: Table S10]
